# Supplementary material for: Transposable element variants and their potential adaptive impact in urban populations of the malaria vector Anopheles coluzzii
Source: HighWire-hosted journal article supplement (doi:10.1101/gr.275761.121), 2021-12-29
Supplement: Supplemental_Table_S1.xlsx [file Supplemental_Table_S1.xlsx]

## Sheet: S1. General statistics
Table S1. General statistics, linear models, and euchromatin coordinates for all the genomes analyzed in this work. A) General statistics for the assembled genomes from the six sampled breeding sites. Whenever available, these statistics are also shown for the reference genome AcolN1. Scaffolding was performed using the AgamP4 chromosome level genome assembly. B) Linear models testing for signifi…
A)
Sample	City	Latitude (dd)	Longitude (dd)	Long read technology	Number of long reads	Long reads coverage	Long reads mean size	Long reads N50	Illumina read pairs	Illumina coverage	Assembly size (bp)	Number of contigs	N50 of contigs (Kb)	Number of scaffolds	N50 of scaffolds (Kb)	Complete BUSCO	Duplicated BUSCO	Missing BUSCO	Transferred genes	Total 1kb upstream bases	Total exon bases	Total intron bases	Total 1kb downstream bases	Total intergenic bases
DLA112	Douala	4.07923	9.6786	Nanopore	7164664	55X	1933	4302	49527453	59×	252369346	3917	234	107	54591	96.6	1.9	1.8	13469	13469000	32383547	70549879	13469000	122497920
DLA155B	Douala	3.99951	9.82401	Nanopore	3614710	28X	1910	4646	15682095	19×	236561446	2081	330	24	52031	89.5	0.9	4.9	13303	13303000	31920965	69126483	13303000	108907998
DLA146	Douala	4.02783	9.77046	Nanopore	2316221	28X	2722	6644	35451824	42×	246885699	2036	363	14	54960	95.1	1.1	3.1	13314	13314000	32026721	70058723	13314000	118172255
LBV88	Libreville	0.37626	9.49005	Nanopore	4249511	31X	1825	3905	34011736	41×	244905343	2576	332	19	54450	94.5	1.8	3.5	13328	13328000	31938911	68847892	13328000	117462540
LBV136	Libreville	0.39397	9.45317	Nanopore	6944106	34X	1224	2495	108727862	130×	236320436	2911	254	28	52053	95.2	1.4	2.7	13307	13307000	31968931	68396278	13307000	109341227
LBV11	Libreville	0.51429	9.36343	Pacbio	6296665	89X	3546	4069	51356681	61×	243008527	2608	259	20	53712	94.2	1.1	3.5	13393	13393000	32068477	69388646	13393000	114765404
AcolN1	Yaounde	-	-	Pacbio	-	~270X	~8,100	~13,000	-	-	251418820	205	3469	5	53057	98.9	2.5	0.5	13487	13487000	32736294	73032521	13487000	118676005
B)
	Long reads coverage			Long reads N50			Number of contigs			N50 of contigs (Kb)			Complete BUSCO			Transferred genes
	slope	p-value	FDR	slope	p-value	FDR	slope	p-value	FDR	slope	p-value	FDR	slope	p-value	FDR	slope	p-value	FDR
Number of contigs	-9.67763	0.0496284	0.328285	-0.40159	0.0189323	0.162818	-	-	-	-	-	-	-	-	-	-	-	-
N50 of contigs (Kb)	13.0853	0.000564123	0.00808576	0.484011	0.00110175	0.0154663	-	-	-	-	-	-	-	-	-	-	-	-
Number of scaffolds	-0.10645	0.552814	0.742844	-0.00565374	0.39	0.6708	0.0228326	0.0513157	0.245175	-0.0102329	0.430394	0.685442	-	-	-	-	-	-
N50 of scaffolds (Kb)	-1.88228	0.768238	0.84919	-0.0202136	0.932978	0.932978	0.269009	0.585041	0.812578	-0.173298	0.711044	0.890635	-	-	-	-	-	-
Complete BUSCO	0.0211469	0.111301	0.403272	0.000457926	0.189993	0.628439	-0.000605122	0.604709	0.812578	0.00145147	0.145062	0.602739	-	-	-	-	-	-
Transferred genes	0.672216	0.0516457	0.328285	0.022657	0.0956315	0.453473	-0.0129205	0.691309	0.866418	0.0409816	0.134643	0.602739	-	-	-	-	-	-
Total number of TE families discoverd	0.259758	0.264208	0.527912	0.00439726	0.471359	0.681657	-0.0113231	0.552498	0.763748	0.0141449	0.423025	0.63118	1.64374	0.830528	0.960003	0.312059	0.224282	0.501963
Total number of families discoverd in only one genome	0.0475387	0.0505373	0.133924	0.00089392	0.189537	0.279041	-0.00148549	0.510883	0.660409	0.00265568	0.178687	0.278541	1.29609	0.103464	0.182787	0.0604586	0.0136134	0.0611787
Total TE copies	5.7084	0.549201	0.740228	0.00564635	0.437068	0.700974	0.259284	0.730874	0.901246	0.13889	0.845464	0.93938	322.56	0.248326	0.641509	15.1007	0.111587	0.288267
% of genome spanned by TEs	0.00980578	0.0604748	0.296111	0.000207813	0.140373	0.568792	-0.000360903	0.447048	0.816629	0.000587128	0.15591	0.587512	0.306166	0.0565914	0.425585	0.0121862	0.0251421	0.165112
Number of insertions in Euchromatin	5.7084	0.549201	0.726556	0.0776817	0.750088	0.914337	0.259284	0.730874	0.860661	0.13889	0.845464	0.918719	322.56	0.248326	0.519227	15.1007	0.111587	0.25665
Number of insertions in Heterochromatin	32.8562	0.00831485	0.0764966	0.766043	0.0249401	0.191207	-1.41387	0.267394	0.768759	2.21183	0.0272032	0.208558	964.004	0.0183335	0.281114	37.816	0.00441064	0.0721463
CACTA	0.147566	0.447413	0.740228	-0.0044279	0.367079	0.657683	0.00525022	0.735684	0.901246	0.00481334	0.742338	0.93938	7.02681	0.218293	0.641509	0.374984	0.0359476	0.163937
copia	-0.089163	0.504927	0.740228	-0.0298866	0.303605	0.579999	0.0178835	0.0362581	0.451574	-0.0091108	0.34144	0.823068	2.20561	0.596987	0.771109	0.108318	0.466384	0.602413
CR1	-0.795778	0.304999	0.69945	0.0057306	0.489052	0.700974	0.108366	0.0330341	0.451574	-0.0782437	0.146554	0.823068	3.86427	0.878966	0.878966	0.343055	0.706562	0.780918
gambol	0.172231	0.432574	0.740228	-0.0488126	0.17928	0.453473	0.00279595	0.874473	0.934782	0.003927	0.813283	0.93938	4.42848	0.518463	0.771109	0.290684	0.212462	0.387431
gypsy	-1.3021	0.179665	0.591414	0.0142572	0.310232	0.579999	0.136458	0.0437007	0.451574	-0.112451	0.0978041	0.823068	-15.9019	0.626059	0.776313	0.000913895	0.99939	0.99939
hAT	0.376655	0.315881	0.69945	0.00301722	0.149496	0.453473	0.000966694	0.975104	0.975104	0.0184811	0.516335	0.842442	17.912	0.0887354	0.556862	0.736278	0.0384808	0.163937
helitron	0.0719436	0.209856	0.591414	0.0038152	0.270357	0.579999	-0.0041649	0.372235	0.825539	0.00358443	0.418055	0.823068	1.3631	0.467479	0.771109	0.0567571	0.397795	0.552384
I	0.099981	0.280522	0.69945	0.00242167	0.798925	0.858845	-0.00208591	0.785821	0.902238	0.00553291	0.429737	0.823068	1.11378	0.713168	0.80244	0.181204	0.0421011	0.163937
Jockey	0.0683998	0.78743	0.817138	0.00137912	0.695376	0.786872	0.0163762	0.390805	0.825539	-0.00284935	0.878774	0.93938	6.67535	0.375887	0.685441	0.410675	0.0939808	0.264855
L1	0.0384297	0.682494	0.817138	-0.00112853	0.656418	0.781742	0.00489042	0.497819	0.825539	0.000515279	0.941004	0.972371	2.83624	0.305263	0.675939	0.164765	0.0620605	0.192387
L2	-0.0185885	0.785156	0.817138	-0.00165583	0.447655	0.700974	0.00621997	0.203781	0.825539	-0.00162168	0.745648	0.93938	1.16353	0.575868	0.771109	0.0795509	0.265786	0.439456
Loner	-0.0527946	0.35734	0.738504	0.00386419	0.200318	0.478537	0.0058821	0.163782	0.825539	-0.00485264	0.235122	0.823068	-0.58703	0.75067	0.80244	0.0229774	0.730536	0.780918
LTR	0.116015	0.138153	0.583542	0.0115648	0.60521	0.743543	-0.0004962	0.942426	0.97384	0.00656208	0.279261	0.823068	5.11881	0.0082892	0.256965	0.190067	0.0047052	0.145861
m2bp	0.272812	0.648909	0.817138	0.0602611	0.159584	0.453473	0.0106719	0.82103	0.908998	0.000674058	0.98792	0.98792	6.45997	0.728526	0.80244	0.699753	0.269344	0.439456
m3bp	1.51183	0.192718	0.591414	0.0116841	0.0464027	0.285045	-0.053225	0.585866	0.825539	0.0743186	0.408949	0.823068	43.1968	0.235724	0.641509	1.8083	0.15642	0.308879
m4bp	0.297358	0.0643721	0.583542	0.0304584	0.0400453	0.285045	-0.0156307	0.264985	0.825539	0.0168446	0.190662	0.823068	5.78222	0.302468	0.675939	0.271729	0.159421	0.308879
m8bp	0.782656	0.0534418	0.583542	0.000780693	0.55971	0.743543	-0.0434054	0.219899	0.825539	0.0514477	0.100304	0.823068	22.0221	0.0925184	0.556862	0.726761	0.136518	0.308879
Maque	0.0290941	0.406502	0.740228	0.0612466	0.116479	0.453473	-0.00245576	0.365961	0.825539	0.00214717	0.404031	0.823068	-0.403547	0.717988	0.80244	-0.00334585	0.934438	0.965586
mTA	1.52797	0.150591	0.583542	-0.00682806	0.826027	0.866321	-0.066247	0.461573	0.825539	0.086139	0.294361	0.823068	46.2393	0.161669	0.556862	1.71864	0.147156	0.308879
otherMITEs	-0.228303	0.782752	0.817138	0.00494041	0.172299	0.453473	0.0675637	0.265063	0.825539	-0.0407743	0.49311	0.842442	13.6703	0.588765	0.771109	0.737437	0.409833	0.552384
Outcast	0.147336	0.115578	0.583542	0.0142851	0.11449	0.453473	-0.0033372	0.686388	0.901246	0.0084617	0.245888	0.823068	1.97062	0.542544	0.771109	0.215178	0.0162026	0.163937
P	0.389048	0.104904	0.583542	-0.0127218	0.672661	0.781742	-0.0129902	0.537916	0.825539	0.0232549	0.211687	0.823068	10.7424	0.16159	0.556862	0.504933	0.0430726	0.163937
Pao_Bel	-0.214541	0.790779	0.817138	0.0188502	0.164974	0.453473	0.0815297	0.150266	0.825539	-0.0339492	0.561803	0.870795	23.0832	0.3327	0.685441	0.790359	0.36162	0.552384
PIF	0.560139	0.110645	0.583542	-0.00249767	0.585564	0.743543	-0.0097058	0.755884	0.901246	0.0300521	0.277777	0.823068	18.715	0.0753435	0.556862	0.755122	0.0346464	0.163937
piggyBac	-0.0843512	0.485756	0.740228	0.0032772	0.294171	0.579999	0.00953494	0.296793	0.825539	-0.00666345	0.45136	0.823068	0.89986	0.814296	0.84144	0.0587875	0.668979	0.780918
R1	0.0586416	0.497068	0.740228	-0.00616686	0.766095	0.844669	-0.00375662	0.580499	0.825539	0.00297132	0.643983	0.93938	1.89863	0.475723	0.771109	0.0834283	0.379054	0.552384
RTE	-0.206106	0.708764	0.817138	0.0124451	0.595117	0.743543	0.0351363	0.399791	0.825539	-0.0147159	0.716629	0.93938	15.1671	0.35495	0.685441	0.384	0.527462	0.654053
Tc1.mar	0.37849	0.542916	0.740228	-0.000183233	0.859092	0.879546	0.0300703	0.535358	0.825539	0.00824102	0.85951	0.93938	24.9371	0.156957	0.556862	1.14681	0.0475946	0.163937
Transib	-0.00253911	0.926668	0.926668	0.0677887	0.0806241	0.433355	0.00154527	0.459585	0.825539	-0.000476191	0.813707	0.93938	1.24634	0.0884311	0.556862	0.0116283	0.703855	0.780918
tSINE	1.65606	0.121919	0.583542	0.223405	0.530701	0.736133	-0.064356	0.486348	0.825539	0.0966292	0.244289	0.823068	49.7132	0.136565	0.556862	2.231	0.0423678	0.163937
C)
DLA112	DLA155B	DLA146	LBV88	LBV136	LBV11	AcolN1
X:1-21285642	X:1-19424863	X:1-20658803	X:1-21127719	X:1-20094235	X:1-20030071	X:1-20731736
2R:1-60408878	2R:1-59395246	2R:1-61801365	2R:1-59503284	2R:1-59017406	2R:1-58498762	2R:1-58541151
2L:4588395-7280648	2L:3797150-6411965	2L:4416540-6959887	2L:4478760-6785765	2L:4189683-6637383	2L:3800099-6162745	2L:5760252-8426396
2L:9005512	2L:7437230	2L:8713781	2L:7976186	2L:7801420	2L:7666482	2L:11792740
3R:1-39388906	3R:1-38572553	3R:1-39829533	3R:1-39951924	3R:1-37676684	3R:1-39595339	3R:1-39586438
3R:42788419-52733764	3R:41896014-50457026	3R:43890516-53248339	3R:43601917-53829164	3R:40945136-50542831	3R:42854336-52712429	3R:43033089-52503153
3L:2403821-4751543	3L:1915465-4167586	3L:2487327-4722420	3L:1919570-3339976	3L:1970116-4299001	3L:1945438-4448586	3L:1465599-3664096
3L:6166683	3L:5138889	3L:5760199	3L:4479930	3L:5351256	3L:5534322	3L:4997744
