# Supplementary material for: Transposable element variants and their potential adaptive impact in urban populations of the malaria vector Anopheles coluzzii
Source: HighWire-hosted journal article supplement (doi:10.1101/gr.275761.121), 2021-12-29
Supplement: Supplemental_Table_S2.xlsx [file Supplemental_Table_S2.xlsx]

## Sheet: S2. TEs identified by REPET
Table S2. TEs identified using REPET. A) Number of TEs identified in each stage of the annotation process. TEs with MAP > 1 correspond to TEs annotated using more than one sequence. TEs with FC >3 correspond to TEs with more than three complete copies in the genome in a single or multiple blocks. TEs with FF >1 correspond to TEs with more than one complete copy in the genome in a single block. Re…
A)										B)
Strain	Raw identified TEs	TEs with Map > 1	TEs with FC > 3 and FF > 1	Reliable TEs	TEs consensus manually corrected	Total annotated TEs	Total TEs after clustering			DLA112	DLA155B	DLA146	LBV88	LBV136	LBV11	AcolN1
DLA112	3771	2888	533	303	13	316	244			Acol_gambol_Ele15#DNA/Gambol	Acol_Jockey_Ele10#LINE/Jockey	Acol_gypsy_Ele62#LTR/Gypsy	Acol_RTE_Ele3#LINE/RTE	Acol_Tc1_Ele15#DNA/Tc1-Mariner	Acol_otherMITEs_Eles8#DNA	Acol_otherMITEs_Eles26#DNA
DLA155B	2883	2082	403	297	16	313	243			Acol_gambol_Ele6#DNA/Gambol	Acol_Transib_Ele2#DNA/Transib	Acol_hAT_Ele13#DNA/hAT	Acol_otherMITEs_Eles26#DNA	Acol_hAT_Ele13#DNA/hAT	Acol_otherMITEs_Eles9#DNA	Acol_otherMITEs_Eles8#DNA
DLA146	3302	2397	270	211	4	215	193			Acol_m8bp_Ele6#DNA/m8bp	Acol_Tc1_Ele19#DNA/Tc1-Mariner	Acol_otherMITEs_Eles12#DNA	Acol_Tc1_Ele15#DNA/Tc1-Mariner	Acol_Transib_Ele2#DNA/Transib	Acol_tSINE_Ele2#SINE/tSINE	Acol_otherMITEs_Eles9#DNA
LBV88	3367	2476	472	349	26	375	280			Acol_PIF_Ele7#DNA/PIF-Harbinger	Acol_Tc1_Ele4#DNA/Tc1-Mariner	Acol_otherMITEs_Eles30#LINE	Acol_PIF_Ele9#DNA/PIF-Harbinger	Acol_PIF_Ele9#DNA/PIF-Harbinger	Acol_otherMITEs_Eles1#DNA	Acol_otherMITEs_Eles14#DNA
LBV136	3018	2171	229	195	7	202	172			Acol_otherMITEs_Eles6#DNA	Acol_otherMITEs_Eles15#DNA	Acol_R1_Ele1#LINE/R1	Acol_PIF_Ele10#DNA/PIF-Harbinger	Acol_PIF_Ele10#DNA/PIF-Harbinger	Acol_m2bp_Ele10#DNA/mTA	Acol_Transib_Ele2#DNA/Transib
LBV11	3396	2501	543	397	29	426	294			Acol_piggyBac_Ele4#DNA/PiggyBac	Acol_Tc1-mar_Ele2#DNA/Tc1-Mariner	Acol_hAT_Ele11#DNA/hAT	Acol_m3bp_Ele1#DNA/m3bp	Acol_m3bp_Ele1#DNA/m3bp	Acol_mTA_Ele29#DNA/mTA	Acol_mTA_Ele23#DNA/mTA
AcolN1	3638	2654	597	374	33	407	283			Acol_m4bp_Ele3#DNA/m4bp	Acol_otherMITEs_Eles30#LINE	Acol_hAT_Ele12#DNA/hAT	Acol_Transib_Ele2#DNA/Transib	Acol_PIF_Ele8#DNA/PIF-Harbinger	Acol_otherMITEs_Eles3#DNA	Acol_otherMITEs_Eles18#DNA
										Acol_piggyBac_Ele2#DNA/PiggyBac	Acol_otherMITEs_Eles6#DNA	Acol_PIF_Ele8#DNA/PIF-Harbinger	Acol_otherMITEs_Eles24#DNA	Acol_PIF_Ele4#DNA/PIF-Harbinger	Acol_otherMITEs_Eles6#DNA	Acol_PIF_Ele11#DNA/PIF-Harbinger
										Acol_otherMITEs_Eles30#LINE	Acol_otherMITEs_Eles5#DNA	Acol_PIF_Ele4#DNA/PIF-Harbinger	Acol_piggyBac_Ele4#DNA/PiggyBac	Acol_otherMITEs_Eles13#DNA	Acol_gypsy_Ele10#LTR/Gypsy	Acol_PIF_Ele10#DNA/PIF-Harbinger
										Acol_Tc1_Ele1#DNA/Tc1-Mariner	Acol_otherMITEs_Eles10#DNA	Acol_mar_Ele15#DNA/Tc1-Mariner	Acol_m4bp_Ele3#DNA/m4bp	Acol_R1_Ele17#LINE/R1	Acol_piggyBac_Ele4#DNA/PiggyBac	Acol_PIF_Ele7#DNA/PIF-Harbinger
										Acol_Maque_Ele1#Undetermined/Maque	Acol_otherMITEs_Eles11#DNA	Acol_mar_Ele23#DNA/Tc1-Mariner	Acol_piggyBac_Ele2#DNA/PiggyBac	Acol_otherMITEs_Eles23#DNA	Acol_m4bp_Ele3#DNA/m4bp	Acol_m3bp_Ele1#DNA/m3bp
										Acol_I_Ele4#LINE/I	Acol_mar_Ele15#DNA/Tc1-Mariner	Acol_mar_Ele14#DNA/Tc1-Mariner	Acol_otherMITEs_Eles3#DNA	Acol_gambol_Ele3#DNA/Gambol	Acol_piggyBac_Ele2#DNA/PiggyBac	Acol_PIF_Ele9#DNA/PIF-Harbinger
										Acol_PIF_Ele8#DNA/PIF-Harbinger	Acol_mar_Ele23#DNA/Tc1-Mariner	Acol_mar_Ele17#DNA/Tc1-Mariner	Acol_R1_Ele1#LINE/R1	Acol_Tc1-mar_Ele8#DNA/Tc1-Mariner	Acol_PIF_Ele9#DNA/PIF-Harbinger	Acol_otherMITEs_Eles6#DNA
										Acol_PIF_Ele4#DNA/PIF-Harbinger	Acol_mar_Ele14#DNA/Tc1-Mariner	Acol_hAT_Ele10#DNA/hAT	Acol_m3bp_Ele9#DNA/m3bp	Acol_Jockey_Ele27#LINE/Jockey	Acol_PIF_Ele10#DNA/PIF-Harbinger	Acol_otherMITEs_Eles30#LINE
										Acol_Pao_Bel_Ele35#LTR/Bel-Pao	Acol_mar_Ele17#DNA/Tc1-Mariner	Acol_Jockey_Ele27#LINE/Jockey	Acol_Tc1-mar_Ele10#DNA/Tc1-Mariner	Acol_Jockey_Ele11#LINE/Jockey	Acol_m3bp_Ele1#DNA/m3bp	Acol_hAT_Ele13#DNA/hAT
										Acol_gambol_Ele3#DNA/Gambol	Acol_PIF_Ele4#DNA/PIF-Harbinger	Acol_Jockey_Ele11#LINE/Jockey	Acol_otherMITEs_Eles6#DNA	Acol_Jockey_Ele28#LINE/Jockey	Acol_helitron_Ele1#DNA/Helitron	Acol_helitron_Ele1#DNA/Helitron
										Acol_Tc1_Ele15#DNA/Tc1-Mariner	Acol_Jockey_Ele28#LINE/Jockey	Acol_Jockey_Ele28#LINE/Jockey	Acol_hAT_Ele9#DNA/hAT	Acol_Tc1_Ele17#DNA/Tc1-Mariner	Acol_RTE_Ele2#LINE/RTE	Acol_RTE_Ele2#LINE/RTE
										Acol_RTE_Ele2#LINE/RTE	Acol_Jockey_Ele27#LINE/Jockey	Acol_Tc1_Ele15#DNA/Tc1-Mariner	Acol_gypsy_Ele85#LTR/Gypsy	Acol_hAT_Ele11#DNA/hAT	Acol_otherMITEs_Eles23#DNA	Acol_otherMITEs_Eles10#DNA
										Acol_tSINE_Ele1#SINE/tSINE	Acol_PIF_Ele8#DNA/PIF-Harbinger	Acol_otherMITEs_Eles20#DNA	Acol_Jockey_Ele11#LINE/Jockey	Acol_hAT_Ele10#DNA/hAT	Acol_hAT_Ele8#DNA/hAT	Acol_otherMITEs_Eles11#DNA
										Acol_hAT_Ele11#DNA/hAT	Acol_mTA_Ele17#DNA/mTA	Acol_otherMITEs_Eles1#DNA	Acol_Jockey_Ele28#LINE/Jockey	Acol_hAT_Ele12#DNA/hAT	Acol_P_Ele5#DNA/P	Acol_Jockey_Ele1#LINE/Jockey
										Acol_hAT_Ele10#DNA/hAT	Acol_CR1_Ele9#LINE/CR1	Acol_CR1_Ele7#LINE/CR1	Acol_Jockey_Ele27#LINE/Jockey	Acol_gypsy_Ele14#LTR/Gypsy	Acol_tSINE_Ele1#SINE/tSINE	Acol_otherMITEs_Eles24#DNA
										Acol_otherMITEs_Eles12#DNA	Acol_gambol_Ele3#DNA/Gambol	Acol_hAT_Ele7#DNA/hAT	Acol_gypsy_Ele68#LTR/Gypsy	Acol_m2bp_Ele1#DNA/mTA	Acol_gambol_Ele2#DNA/Gambol	Acol_mar_Ele15#DNA/Tc1-Mariner
										Acol_hAT_Ele12#DNA/hAT	Acol_Pao_Bel_Ele35#LTR/Bel-Pao	Acol_m8bp_Ele8#DNA/m8bp	Acol_gypsy_Ele4#LTR/Gypsy	Acol_otherMITEs_Eles12#DNA	Acol_Jockey_Ele28#LINE/Jockey	Acol_mar_Ele23#DNA/Tc1-Mariner
										Acol_m4bp_Ele1#DNA/m4bp	Acol_hAT_Ele12#DNA/hAT	Acol_Pao_Bel_Ele53#LTR/Bel-Pao	Acol_tSINE_Ele1#SINE/tSINE	Acol_otherMITEs_Eles29#DNA	Acol_Jockey_Ele27#LINE/Jockey	Acol_mar_Ele14#DNA/Tc1-Mariner
										Acol_gypsy_Ele53#LTR/Gypsy	Acol_hAT_Ele11#DNA/hAT	Acol_tSINE_Ele1#SINE/tSINE	Acol_m4bp_Ele2#DNA/m4bp	Acol_tSINE_Ele1#SINE/tSINE	Acol_R1_Ele16#LINE/R1	Acol_mar_Ele17#DNA/Tc1-Mariner
										Acol_tSINE_Ele2#SINE/tSINE	Acol_Tc1_Ele1#DNA/Tc1-Mariner	Acol_otherMITEs_Eles17#DNA	Acol_gambol_Ele3#DNA/Gambol	Acol_otherMITEs_Eles19#DNA	Acol_Tc1-mar_Ele3#DNA/Tc1-Mariner	Acol_PIF_Ele4#DNA/PIF-Harbinger
										Acol_Tc1_Ele3#DNA/Tc1-Mariner	Acol_Maque_Ele1#Undetermined/Maque	Acol_RTE_Ele3#LINE/RTE	Acol_otherMITEs_Eles13#DNA	Acol_mTA_Ele10#DNA/mTA	Acol_PIF_Ele12#DNA/PIF-Harbinger	Acol_otherMITEs_Eles5#DNA
										Acol_otherMITEs_Eles21#DNA	Acol_I_Ele4#LINE/I	Acol_gambol_Ele5#DNA/Gambol	Acol_PIF_Ele8#DNA/PIF-Harbinger	Acol_CACTA_Ele5#DNA/CACTA	Acol_Tc1_Ele15#DNA/Tc1-Mariner	Acol_hAT_Ele11#DNA/hAT
										Acol_P_Ele5#DNA/P	Acol_hAT_Ele10#DNA/hAT	Acol_CR1_Ele19#LINE/CR1	Acol_PIF_Ele4#DNA/PIF-Harbinger	Acol_PIF_Ele11#DNA/PIF-Harbinger	Acol_Tc1-mar_Ele1#DNA/Tc1-Mariner	Acol_hAT_Ele12#DNA/hAT
										Acol_hAT_Ele8#DNA/hAT	Acol_CR1_Ele3#LINE/CR1	Acol_copia_Ele24#LTR/Copia	Acol_otherMITEs_Eles12#DNA	Acol_CACTA_Ele8#DNA/CACTA	Acol_Tc1_Ele1#DNA/Tc1-Mariner	Acol_hAT_Ele9#DNA/hAT
										Acol_L1_Ele6#LINE/L1	Acol_otherMITEs_Eles12#DNA	Acol_copia_Ele4#LTR/Copia	Acol_hAT_Ele10#DNA/hAT	Acol_RTE_Ele1#LINE/RTE	Acol_Maque_Ele1#Undetermined/Maque	Acol_Pao_Bel_Ele53#LTR/Bel-Pao
										Acol_R1_Ele12#LINE/R1	Acol_gambol_Ele1#DNA/Gambol	Acol_CR1_Ele9#LINE/CR1	Acol_hAT_Ele11#DNA/hAT	Acol_CR1_Ele7#LINE/CR1	Acol_I_Ele4#LINE/I	Acol_gypsy_Ele82#LTR/Gypsy
										Acol_R1_Ele14#LINE/R1	Acol_Tc1-mar_Ele5#DNA/Tc1-Mariner	Acol_mTA_Ele9#DNA/mTA	Acol_otherMITEs_Eles11#DNA	Acol_CR1_Ele9#LINE/CR1	Acol_otherMITEs_Eles14#DNA	Acol_Tc1_Ele15#DNA/Tc1-Mariner
										Acol_R1_Ele13#LINE/R1	Acol_hAT_Ele13#DNA/hAT	Acol_L1_Ele7#LINE/L1	Acol_otherMITEs_Eles10#DNA	Acol_gypsy_Ele69#LTR/Gypsy	Acol_hAT_Ele11#DNA/hAT	Acol_PIF_Ele8#DNA/PIF-Harbinger
										Acol_L1_Ele7#LINE/L1	Acol_RTE_Ele2#LINE/RTE	Acol_Jockey_Ele1#LINE/Jockey	Acol_mTA_Ele3#DNA/mTA	Acol_Jockey_Ele19#LINE/Jockey	Acol_hAT_Ele12#DNA/hAT	Acol_Tc1_Ele4#DNA/Tc1-Mariner
										Acol_CR1_Ele22#LINE/CR1	Acol_helitron_Ele1#DNA/Helitron	Acol_Pao_Bel_Ele70#LTR/Bel-Pao	Acol_RTE_Ele2#LINE/RTE	Acol_gypsy_Ele35#LTR/Gypsy	Acol_otherMITEs_Eles5#DNA	Acol_Tc1_Ele19#DNA/Tc1-Mariner
										Acol_Jockey_Ele19#LINE/Jockey	Acol_tSINE_Ele1#SINE/tSINE	Acol_LTR_Ele3#LTR	Acol_helitron_Ele1#DNA/Helitron	Acol_CR1_Ele28#LINE/CR1	Acol_CR1_Ele9#LINE/CR1	Acol_Tc1_Ele1#DNA/Tc1-Mariner
										Acol_CR1_Ele7#LINE/CR1	Acol_tSINE_Ele2#SINE/tSINE	Acol_hAT_Ele6#DNA/hAT	Acol_Pao_Bel_Ele3#LTR/Bel-Pao	Acol_R1_Ele12#LINE/R1	Acol_LTR_Ele4#LTR	Acol_Maque_Ele1#Undetermined/Maque
										Acol_Pao_Bel_Ele77#LTR/Bel-Pao	Acol_Tc1_Ele18#DNA/Tc1-Mariner	Acol_Jockey_Ele25#LINE/Jockey	Acol_Tc1_Ele5#DNA/Tc1-Mariner	Acol_R1_Ele14#LINE/R1	Acol_hAT_Ele10#DNA/hAT	Acol_I_Ele4#LINE/I
										Acol_Pao_Bel_Ele64#LTR/Bel-Pao	Acol_mTA_Ele15#DNA/mTA	Acol_CR1_Ele2#LINE/CR1	Acol_Tc1_Ele4#DNA/Tc1-Mariner	Acol_R1_Ele13#LINE/R1	Acol_m3bp_Ele7#DNA/m3bp	Acol_mTA_Ele31#DNA/mTA
										Acol_CR1_Ele13#LINE/CR1	Acol_m3bp_Ele1#DNA/m3bp	Acol_gypsy_Ele35#LTR/Gypsy	Acol_Tc1_Ele19#DNA/Tc1-Mariner	Acol_CR1_Ele30#LINE/CR1	Acol_m4bp_Ele1#DNA/m4bp	Acol_CR1_Ele3#LINE/CR1
										Acol_CR1_Ele20#LINE/CR1	Acol_PIF_Ele10#DNA/PIF-Harbinger	Acol_copia_Ele5#LTR/Copia	Acol_Tc1_Ele18#DNA/Tc1-Mariner	Acol_gypsy_Ele90#LTR/Gypsy	Acol_mTA_Ele15#DNA/mTA	Acol_hAT_Ele10#DNA/hAT
										Acol_Loner_Ele3#LINE/Loner	Acol_PIF_Ele9#DNA/PIF-Harbinger	Acol_P_Ele10#DNA/P	Acol_CR1_Ele6#LINE/CR1	Acol_copia_Ele10#LTR/Copia	Acol_mTA_Ele6#DNA/mTA	Acol_tSINE_Ele1#SINE/tSINE
										Acol_copia_Ele20#LTR/Copia	Acol_copia_Ele24#LTR/Copia	Acol_PIF_Ele3#DNA/PIF-Harbinger	Acol_mar_Ele14#DNA/Tc1-Mariner	Acol_copia_Ele5#LTR/Copia	Acol_mTA_Ele28#DNA/mTA	Acol_m2bp_Ele2#DNA/mTA
										Acol_gypsy_Ele35#LTR/Gypsy	Acol_copia_Ele4#LTR/Copia	Acol_L1_Ele5#LINE/L1	Acol_otherMITEs_Eles5#DNA	Acol_copia_Ele8#LTR/Copia	Acol_Pao_Bel_Ele35#LTR/Bel-Pao	Acol_hAT_Ele8#DNA/hAT
										Acol_CR1_Ele9#LINE/CR1	Acol_P_Ele4#DNA/P	Acol_R1_Ele3#LINE/R1	Acol_Pao_Bel_Ele35#LTR/Bel-Pao	Acol_gypsy_Ele13#LTR/Gypsy	Acol_gypsy_Ele53#LTR/Gypsy	Acol_Pao_Bel_Ele35#LTR/Bel-Pao
										Acol_gypsy_Ele38#LTR/Gypsy	Acol_m8bp_Ele6#DNA/m8bp	Acol_R1_Ele7#LINE/R1	Acol_tSINE_Ele2#SINE/tSINE	Acol_gypsy_Ele12#LTR/Gypsy	Acol_otherMITEs_Eles17#DNA	Acol_Tc1_Ele3#DNA/Tc1-Mariner
										Acol_copia_Ele14#LTR/Copia	Acol_P_Ele13#DNA/P	Acol_R1_Ele5#LINE/R1	Acol_gypsy_Ele23#LTR/Gypsy	Acol_Pao_Bel_Ele38#LTR/Bel-Pao	Acol_gambol_Ele1#DNA/Gambol	Acol_copia_Ele24#LTR/Copia
										Acol_gypsy_Ele65#LTR/Gypsy	Acol_CR1_Ele21#LINE/CR1	Acol_CR1_Ele30#LINE/CR1	Acol_CR1_Ele30#LINE/CR1	Acol_gypsy_Ele41#LTR/Gypsy	Acol_Tc1-mar_Ele5#DNA/Tc1-Mariner	Acol_copia_Ele4#LTR/Copia
										Acol_CR1_Ele30#LINE/CR1	Acol_CR1_Ele7#LINE/CR1	Acol_copia_Ele21#LTR/Copia	Acol_L1_Ele8#LINE/L1	Acol_R1_Ele5#LINE/R1	Acol_LTR_Ele3#LTR	Acol_otherMITEs_Eles1#DNA
										Acol_gypsy_Ele21#LTR/Gypsy	Acol_LTR_Ele3#LTR	Acol_copia_Ele8#LTR/Copia	Acol_CR1_Ele7#LINE/CR1	Acol_R1_Ele3#LINE/R1	Acol_Tc1_Ele3#DNA/Tc1-Mariner	Acol_P_Ele5#DNA/P
										Acol_CR1_Ele28#LINE/CR1	Acol_Jockey_Ele24#LINE/Jockey	Acol_CR1_Ele13#LINE/CR1	Acol_Pao_Bel_Ele77#LTR/Bel-Pao	Acol_Pao_Bel_Ele9#LTR/Bel-Pao	Acol_gypsy_Ele87#LTR/Gypsy	Acol_RTE_Ele1#LINE/RTE
										Acol_gypsy_Ele94#LTR/Gypsy	Acol_gypsy_Ele85#LTR/Gypsy	Acol_gypsy_Ele61#LTR/Gypsy	Acol_Jockey_Ele24#LINE/Jockey	Acol_I_Ele2#LINE/I	Acol_LTR_Ele2#LTR	Acol_L1_Ele7#LINE/L1
										Acol_gypsy_Ele90#LTR/Gypsy	Acol_gypsy_Ele68#LTR/Gypsy	Acol_gypsy_Ele79#LTR/Gypsy	Acol_gypsy_Ele8#LTR/Gypsy	Acol_Pao_Bel_Ele18#LTR/Bel-Pao	Acol_gypsy_Ele20#LTR/Gypsy	Acol_gypsy_Ele16#LTR/Gypsy
										Acol_helitron_Ele1#DNA/Helitron	Acol_gypsy_Ele8#LTR/Gypsy	Acol_gypsy_Ele83#LTR/Gypsy	Acol_Jockey_Ele19#LINE/Jockey	Acol_m2bp_Ele8#DNA/mTA	Acol_P_Ele3#DNA/P	Acol_Jockey_Ele19#LINE/Jockey
										Acol_Pao_Bel_Ele80#LTR/Bel-Pao	Acol_gypsy_Ele4#LTR/Gypsy	Acol_Pao_Bel_Ele80#LTR/Bel-Pao	Acol_gypsy_Ele73#LTR/Gypsy	Acol_Pao_Bel_Ele66#LTR/Bel-Pao	Acol_P_Ele2#DNA/P	Acol_CR1_Ele23#LINE/CR1
										Acol_Pao_Bel_Ele53#LTR/Bel-Pao	Acol_gypsy_Ele3#LTR/Gypsy	Acol_Pao_Bel_Ele50#LTR/Bel-Pao	Acol_Tc1-mar_Ele5#DNA/Tc1-Mariner	Acol_Pao_Bel_Ele10#LTR/Bel-Pao	Acol_P_Ele12#DNA/P	Acol_Jockey_Ele24#LINE/Jockey
										Acol_CR1_Ele27#LINE/CR1	Acol_gypsy_Ele67#LTR/Gypsy	Acol_Pao_Bel_Ele9#LTR/Bel-Pao	Acol_gambol_Ele1#DNA/Gambol	Acol_m2bp_Ele5#DNA/mTA	Acol_m2bp_Ele2#DNA/mTA	Acol_L2_Ele3#LINE/L2
										Acol_copia_Ele10#LTR/Copia	Acol_Pao_Bel_Ele79#LTR/Bel-Pao	Acol_Pao_Bel_Ele66#LTR/Bel-Pao	Acol_CR1_Ele5#LINE/CR1	Acol_mTA_Ele21#DNA/mTA	Acol_Pao_Bel_Ele45#LTR/Bel-Pao	Acol_L2_Ele4#LINE/L2
										Acol_gypsy_Ele95#LTR/Gypsy	Acol_L2_Ele1#LINE/L2	Acol_Pao_Bel_Ele49#LTR/Bel-Pao	Acol_L1_Ele2#LINE/L1	Acol_mTA_Ele9#DNA/mTA	Acol_P_Ele13#DNA/P	Acol_Jockey_Ele15#LINE/Jockey
										Acol_I_Ele3#LINE/I	Acol_gypsy_Ele94#LTR/Gypsy	Acol_Pao_Bel_Ele18#LTR/Bel-Pao	Acol_gypsy_Ele92#LTR/Gypsy	Acol_Tc1-mar_Ele10#DNA/Tc1-Mariner	Acol_PIF_Ele11#DNA/PIF-Harbinger	Acol_Pao_Bel_Ele77#LTR/Bel-Pao
										Acol_gypsy_Ele57#LTR/Gypsy	Acol_gypsy_Ele35#LTR/Gypsy	Acol_m3bp_Ele12#DNA/m3bp	Acol_copia_Ele6#LTR/Copia	Acol_Pao_Bel_Ele35#LTR/Bel-Pao	Acol_CACTA_Ele8#DNA/CACTA	Acol_Pao_Bel_Ele64#LTR/Bel-Pao
										Acol_gypsy_Ele78#LTR/Gypsy	Acol_gypsy_Ele90#LTR/Gypsy	Acol_m3bp_Ele15#DNA/m3bp	Acol_CR1_Ele20#LINE/CR1	Acol_mTA_Ele20#DNA/mTA	Acol_m2bp_Ele1#DNA/mTA	Acol_gambol_Ele4#DNA/Gambol
										Acol_Jockey_Ele15#LINE/Jockey	Acol_gypsy_Ele51#LTR/Gypsy	Acol_m2bp_Ele11#DNA/mTA	Acol_gypsy_Ele88#LTR/Gypsy	Acol_P_Ele14#DNA/P	Acol_L1_Ele8#LINE/L1	Acol_CR1_Ele8#LINE/CR1
										Acol_Jockey_Ele10#LINE/Jockey	Acol_CR1_Ele20#LINE/CR1	Acol_Tc1-mar_Ele4#DNA/Tc1-Mariner	Acol_gypsy_Ele76#LTR/Gypsy	Acol_mTA_Ele12#DNA/mTA	Acol_Outcast_Ele2#LINE/Outcast	Acol_gypsy_Ele46#LTR/Gypsy
										Acol_gypsy_Ele12#LTR/Gypsy	Acol_CR1_Ele12#LINE/CR1	Acol_Tc1-mar_Ele11#DNA/Tc1-Mariner	Acol_copia_Ele21#LTR/Copia	Acol_m3bp_Ele15#DNA/m3bp	Acol_CR1_Ele23#LINE/CR1	Acol_Jockey_Ele14#LINE/Jockey
										Acol_gypsy_Ele42#LTR/Gypsy	Acol_L1_Ele2#LINE/L1	Acol_mTA_Ele20#DNA/mTA	Acol_gypsy_Ele75#LTR/Gypsy	Acol_m8bp_Ele12#DNA/m8bp	Acol_otherMITEs_Eles28#DNA	Acol_CR1_Ele27#LINE/CR1
										Acol_R1_Ele19#LINE/R1	Acol_CR1_Ele13#LINE/CR1	Acol_Pao_Bel_Ele35#LTR/Bel-Pao	Acol_CR1_Ele12#LINE/CR1	Acol_mTA_Ele6#DNA/mTA	Acol_CR1_Ele7#LINE/CR1	Acol_gypsy_Ele21#LTR/Gypsy
										Acol_R1_Ele6#LINE/R1	Acol_copia_Ele15#LTR/Copia	Acol_mTA_Ele31#DNA/mTA	Acol_gypsy_Ele38#LTR/Gypsy	Acol_mTA_Ele28#DNA/mTA	Acol_copia_Ele13#LTR/Copia	Acol_CR1_Ele28#LINE/CR1
										Acol_m3bp_Ele2#DNA/m3bp	Acol_gypsy_Ele83#LTR/Gypsy	Acol_mTA_Ele21#DNA/mTA	Acol_gypsy_Ele18#LTR/Gypsy	Acol_m3bp_Ele12#DNA/m3bp	Acol_CR1_Ele1#LINE/CR1	Acol_CR1_Ele19#LINE/CR1
										Acol_Pao_Bel_Ele13#LTR/Bel-Pao	Acol_gypsy_Ele18#LTR/Gypsy	Acol_gypsy_Ele85#LTR/Gypsy	Acol_L2_Ele4#LINE/L2	Acol_otherMITEs_Eles7#DNA	Acol_Pao_Bel_Ele79#LTR/Bel-Pao	Acol_CR1_Ele12#LINE/CR1
										Acol_R1_Ele9#LINE/R1	Acol_CACTA_Ele1#DNA/CACTA	Acol_gypsy_Ele4#LTR/Gypsy	Acol_L2_Ele3#LINE/L2	Acol_mTA_Ele3#DNA/mTA	Acol_Jockey_Ele12#LINE/Jockey	Acol_copia_Ele8#LTR/Copia
										Acol_Pao_Bel_Ele59#LTR/Bel-Pao	Acol_mTA_Ele28#DNA/mTA	Acol_gypsy_Ele68#LTR/Gypsy	Acol_gypsy_Ele12#LTR/Gypsy	Acol_P_Ele6#DNA/P	Acol_CR1_Ele31#LINE/CR1	Acol_copia_Ele6#LTR/Copia
										Acol_Pao_Bel_Ele18#LTR/Bel-Pao	Acol_mTA_Ele6#DNA/mTA	Acol_gypsy_Ele8#LTR/Gypsy	Acol_gypsy_Ele15#LTR/Gypsy	Acol_m8bp_Ele11#DNA/m8bp	Acol_gypsy_Ele85#LTR/Gypsy	Acol_gambol_Ele10#DNA/Gambol
										Acol_Pao_Bel_Ele21#LTR/Bel-Pao	Acol_gypsy_Ele82#LTR/Gypsy	Acol_gypsy_Ele3#LTR/Gypsy	Acol_R1_Ele14#LINE/R1	Acol_m3bp_Ele23#DNA/m3bp	Acol_gypsy_Ele68#LTR/Gypsy	Acol_otherMITEs_Eles2#DNA
										Acol_Pao_Bel_Ele26#LTR/Bel-Pao	Acol_gypsy_Ele45#LTR/Gypsy	Acol_gypsy_Ele67#LTR/Gypsy	Acol_R1_Ele12#LINE/R1	Acol_otherMITEs_Eles27#DNA	Acol_gypsy_Ele8#LTR/Gypsy	Acol_Jockey_Ele10#LINE/Jockey
										Acol_Pao_Bel_Ele55#LTR/Bel-Pao	Acol_gypsy_Ele93#LTR/Gypsy	Acol_mTA_Ele13#DNA/mTA	Acol_R1_Ele13#LINE/R1	Acol_gambol_Ele16#DNA/Gambol	Acol_gypsy_Ele4#LTR/Gypsy	Acol_copia_Ele21#LTR/Copia
										Acol_gypsy_Ele36#LTR/Gypsy	Acol_Pao_Bel_Ele70#LTR/Bel-Pao	Acol_otherMITEs_Eles25#DNA	Acol_Pao_Bel_Ele57#LTR/Bel-Pao	Acol_m8bp_Ele6#DNA/m8bp	Acol_copia_Ele26#LTR/Copia	Acol_CR1_Ele13#LINE/CR1
										Acol_gypsy_Ele37#LTR/Gypsy	Acol_Pao_Bel_Ele52#LTR/Bel-Pao	Acol_PIF_Ele11#DNA/PIF-Harbinger	Acol_P_Ele5#DNA/P	Acol_m4bp_Ele3#DNA/m4bp	Acol_Jockey_Ele21#LINE/Jockey	Acol_gypsy_Ele88#LTR/Gypsy
										Acol_gypsy_Ele8#LTR/Gypsy	Acol_Pao_Bel_Ele58#LTR/Bel-Pao	Acol_PIF_Ele5#DNA/PIF-Harbinger	Acol_Pao_Bel_Ele18#LTR/Bel-Pao	Acol_piggyBac_Ele4#DNA/PiggyBac	Acol_CR1_Ele3#LINE/CR1	Acol_gypsy_Ele75#LTR/Gypsy
										Acol_gypsy_Ele4#LTR/Gypsy	Acol_Pao_Bel_Ele13#LTR/Bel-Pao	Acol_PIF_Ele10#DNA/PIF-Harbinger	Acol_R1_Ele6#LINE/R1	Acol_P_Ele2#DNA/P	Acol_gypsy_Ele23#LTR/Gypsy	Acol_gypsy_Ele65#LTR/Gypsy
										Acol_gypsy_Ele3#LTR/Gypsy	Acol_Pao_Bel_Ele38#LTR/Bel-Pao	Acol_CACTA_Ele8#DNA/CACTA	Acol_gypsy_Ele34#LTR/Gypsy	Acol_P_Ele3#DNA/P	Acol_gypsy_Ele92#LTR/Gypsy	Acol_gypsy_Ele49#LTR/Gypsy
										Acol_gypsy_Ele68#LTR/Gypsy	Acol_Pao_Bel_Ele72#LTR/Bel-Pao	Acol_otherMITEs_Eles8#DNA	Acol_Pao_Bel_Ele10#LTR/Bel-Pao	Acol_P_Ele12#DNA/P	Acol_CR1_Ele22#LINE/CR1	Acol_gypsy_Ele58#LTR/Gypsy
										Acol_gypsy_Ele67#LTR/Gypsy	Acol_Pao_Bel_Ele25#LTR/Bel-Pao	Acol_otherMITEs_Eles9#DNA	Acol_Pao_Bel_Ele58#LTR/Bel-Pao	Acol_Tc1_Ele16#DNA/Tc1-Mariner	Acol_copia_Ele6#LTR/Copia	Acol_gypsy_Ele80#LTR/Gypsy
										Acol_gypsy_Ele85#LTR/Gypsy	Acol_gypsy_Ele36#LTR/Gypsy	Acol_Tc1_Ele1#DNA/Tc1-Mariner	Acol_Pao_Bel_Ele2#LTR/Bel-Pao	Acol_mTA_Ele27#DNA/mTA	Acol_gypsy_Ele76#LTR/Gypsy	Acol_gypsy_Ele18#LTR/Gypsy
										Acol_m3bp_Ele7#DNA/m3bp	Acol_Pao_Bel_Ele53#LTR/Bel-Pao	Acol_otherMITEs_Eles27#DNA	Acol_Pao_Bel_Ele72#LTR/Bel-Pao	Acol_otherMITEs_Eles22#DNA	Acol_copia_Ele5#LTR/Copia	Acol_gypsy_Ele57#LTR/Gypsy
										Acol_m2bp_Ele10#DNA/mTA	Acol_Loner_Ele2#LINE/Loner	Acol_m2bp_Ele3#DNA/mTA	Acol_gambol_Ele7#DNA/Gambol	Acol_gambol_Ele15#DNA/Gambol	Acol_gambol_Ele10#DNA/Gambol	Acol_gypsy_Ele39#LTR/Gypsy
										Acol_mTA_Ele29#DNA/mTA	Acol_Pao_Bel_Ele11#LTR/Bel-Pao	Acol_Tc1-mar_Ele2#DNA/Tc1-Mariner	Acol_Pao_Bel_Ele49#LTR/Bel-Pao	Acol_gambol_Ele6#DNA/Gambol	Acol_otherMITEs_Eles2#DNA	Acol_L1_Ele2#LINE/L1
										Acol_mTA_Ele31#DNA/mTA	Acol_Pao_Bel_Ele62#LTR/Bel-Pao	Acol_otherMITEs_Eles21#DNA	Acol_Pao_Bel_Ele64#LTR/Bel-Pao	Acol_otherMITEs_Eles21#DNA	Acol_Jockey_Ele10#LINE/Jockey	Acol_gypsy_Ele12#LTR/Gypsy
										Acol_mTA_Ele27#DNA/mTA	Acol_gypsy_Ele24#LTR/Gypsy	Acol_Tc1_Ele19#DNA/Tc1-Mariner	Acol_gypsy_Ele5#LTR/Gypsy	Acol_Tc1_Ele1#DNA/Tc1-Mariner	Acol_CR1_Ele20#LINE/CR1	Acol_gypsy_Ele15#LTR/Gypsy
										Acol_Tc1-mar_Ele10#DNA/Tc1-Mariner	Acol_m3bp_Ele2#DNA/m3bp	Acol_Tc1_Ele4#DNA/Tc1-Mariner	Acol_gypsy_Ele67#LTR/Gypsy	Acol_RTE_Ele2#LINE/RTE	Acol_copia_Ele21#LTR/Copia	Acol_L2_Ele5#LINE/L2
										Acol_mTA_Ele12#DNA/mTA	Acol_mTA_Ele1#DNA/mTA	Acol_otherMITEs_Eles7#DNA	Acol_gypsy_Ele3#LTR/Gypsy	Acol_helitron_Ele1#DNA/Helitron	Acol_CR1_Ele13#LINE/CR1	Acol_gypsy_Ele50#LTR/Gypsy
										Acol_Tc1-mar_Ele11#DNA/Tc1-Mariner	Acol_mTA_Ele9#DNA/mTA	Acol_otherMITEs_Eles18#DNA	Acol_PIF_Ele12#DNA/PIF-Harbinger	Acol_m3bp_Ele6#DNA/m3bp	Acol_Pao_Bel_Ele31#LTR/Bel-Pao	Acol_gypsy_Ele52#LTR/Gypsy
										Acol_Tc1-mar_Ele4#DNA/Tc1-Mariner	Acol_m3bp_Ele15#DNA/m3bp	Acol_Transib_Ele2#DNA/Transib	Acol_mTA_Ele1#DNA/mTA	Acol_m3bp_Ele9#DNA/m3bp	Acol_gypsy_Ele65#LTR/Gypsy	Acol_Outcast_Ele7#LINE/Outcast
										Acol_m3bp_Ele15#DNA/m3bp	Acol_mTA_Ele20#DNA/mTA	Acol_m3bp_Ele2#DNA/m3bp	Acol_mTA_Ele21#DNA/mTA	Acol_mTA_Ele31#DNA/mTA	Acol_gypsy_Ele51#LTR/Gypsy	Acol_gypsy_Ele59#LTR/Gypsy
										Acol_mTA_Ele6#DNA/mTA	Acol_mTA_Ele13#DNA/mTA	Acol_mTA_Ele12#DNA/mTA	Acol_m3bp_Ele2#DNA/m3bp	Acol_otherMITEs_Eles4#DNA	Acol_gypsy_Ele38#LTR/Gypsy	Acol_gypsy_Ele11#LTR/Gypsy
										Acol_mTA_Ele28#DNA/mTA	Acol_gambol_Ele15#DNA/Gambol	Acol_m3bp_Ele23#DNA/m3bp	Acol_Jockey_Ele10#LINE/Jockey	Acol_Tc1-mar_Ele2#DNA/Tc1-Mariner	Acol_gypsy_Ele57#LTR/Gypsy	Acol_R1_Ele6#LINE/R1
										Acol_mTA_Ele21#DNA/mTA	Acol_m8bp_Ele12#DNA/m8bp	Acol_gambol_Ele15#DNA/Gambol	Acol_m3bp_Ele15#DNA/m3bp	Acol_mTA_Ele23#DNA/mTA	Acol_gypsy_Ele56#LTR/Gypsy	Acol_Pao_Bel_Ele72#LTR/Bel-Pao
										Acol_mTA_Ele20#DNA/mTA	Acol_mTA_Ele30#DNA/mTA	Acol_gambol_Ele6#DNA/Gambol	Acol_mTA_Ele9#DNA/mTA	Acol_Pao_Bel_Ele45#LTR/Bel-Pao	Acol_gypsy_Ele16#LTR/Gypsy	Acol_I_Ele3#LINE/I
										Acol_m3bp_Ele24#DNA/m3bp	Acol_PIF_Ele11#DNA/PIF-Harbinger	Acol_mTA_Ele6#DNA/mTA	Acol_mTA_Ele31#DNA/mTA	Acol_Maque_Ele1#Undetermined/Maque	Acol_gypsy_Ele39#LTR/Gypsy	Acol_R1_Ele5#LINE/R1
										Acol_gypsy_Ele39#LTR/Gypsy	Acol_PIF_Ele5#DNA/PIF-Harbinger	Acol_mTA_Ele28#DNA/mTA	Acol_mTA_Ele12#DNA/mTA	Acol_I_Ele4#LINE/I	Acol_gypsy_Ele14#LTR/Gypsy	Acol_R1_Ele3#LINE/R1
										Acol_mTA_Ele9#DNA/mTA	Acol_P_Ele6#DNA/P	Acol_otherMITEs_Eles2#DNA	Acol_otherMITEs_Eles2#DNA	Acol_R1_Ele1#LINE/R1	Acol_gypsy_Ele13#LTR/Gypsy	Acol_R1_Ele19#LINE/R1
										Acol_mTA_Ele13#DNA/mTA	Acol_m3bp_Ele25#DNA/m3bp	Acol_Jockey_Ele10#LINE/Jockey	Acol_gambol_Ele10#DNA/Gambol	Acol_Tc1-mar_Ele4#DNA/Tc1-Mariner	Acol_gypsy_Ele42#LTR/Gypsy	Acol_Pao_Bel_Ele74#LTR/Bel-Pao
										Acol_mTA_Ele30#DNA/mTA	Acol_mTA_Ele23#DNA/mTA	Acol_gambol_Ele10#DNA/Gambol	Acol_gypsy_Ele69#LTR/Gypsy	Acol_Tc1-mar_Ele11#DNA/Tc1-Mariner	Acol_gypsy_Ele15#LTR/Gypsy	Acol_R1_Ele9#LINE/R1
										Acol_P_Ele6#DNA/P	Acol_m3bp_Ele6#DNA/m3bp	Acol_CR1_Ele12#LINE/CR1	Acol_PIF_Ele5#DNA/PIF-Harbinger	Acol_PIF_Ele12#DNA/PIF-Harbinger	Acol_gypsy_Ele41#LTR/Gypsy	Acol_Pao_Bel_Ele58#LTR/Bel-Pao
										Acol_otherMITEs_Eles27#DNA	Acol_Pao_Bel_Ele60#LTR/Bel-Pao	Acol_m8bp_Ele12#DNA/m8bp	Acol_m3bp_Ele24#DNA/m3bp	Acol_CR1_Ele3#LINE/CR1	Acol_CACTA_Ele3#DNA/CACTA	Acol_Pao_Bel_Ele13#LTR/Bel-Pao
										Acol_otherMITEs_Eles4#DNA	Acol_m3bp_Ele9#DNA/m3bp	Acol_P_Ele8#DNA/P	Acol_mTA_Ele20#DNA/mTA	Acol_gypsy_Ele21#LTR/Gypsy	Acol_gypsy_Ele52#LTR/Gypsy	Acol_Pao_Bel_Ele55#LTR/Bel-Pao
										Acol_mTA_Ele3#DNA/mTA	Acol_gypsy_Ele39#LTR/Gypsy	Acol_otherMITEs_Eles4#DNA	Acol_m3bp_Ele10#DNA/m3bp	Acol_m3bp_Ele2#DNA/m3bp	Acol_Outcast_Ele7#LINE/Outcast	Acol_Pao_Bel_Ele25#LTR/Bel-Pao
										Acol_otherMITEs_Eles7#DNA	Acol_Tc1-mar_Ele10#DNA/Tc1-Mariner	Acol_P_Ele14#DNA/P	Acol_mTA_Ele30#DNA/mTA	Acol_Jockey_Ele10#LINE/Jockey	Acol_gypsy_Ele86#LTR/Gypsy	Acol_Pao_Bel_Ele28#LTR/Bel-Pao
										Acol_m2bp_Ele5#DNA/mTA	Acol_m3bp_Ele21#DNA/m3bp	Acol_gypsy_Ele69#LTR/Gypsy	Acol_mTA_Ele13#DNA/mTA	Acol_otherMITEs_Eles2#DNA	Acol_gypsy_Ele59#LTR/Gypsy	Acol_Pao_Bel_Ele33#LTR/Bel-Pao
										Acol_m8bp_Ele8#DNA/m8bp	Acol_mTA_Ele29#DNA/mTA	Acol_m3bp_Ele6#DNA/m3bp	Acol_m2bp_Ele2#DNA/mTA	Acol_gambol_Ele10#DNA/Gambol	Acol_Outcast_Ele8#LINE/Outcast	Acol_Pao_Bel_Ele5#LTR/Bel-Pao
										Acol_gambol_Ele16#DNA/Gambol	Acol_m8bp_Ele8#DNA/m8bp	Acol_Tc1_Ele17#DNA/Tc1-Mariner	Acol_m3bp_Ele6#DNA/m3bp	Acol_mar_Ele15#DNA/Tc1-Mariner	Acol_R1_Ele9#LINE/R1	Acol_gypsy_Ele67#LTR/Gypsy
										Acol_gambol_Ele7#DNA/Gambol	Acol_otherMITEs_Eles14#DNA	Acol_Pao_Bel_Ele10#LTR/Bel-Pao	Acol_m8bp_Ele2#DNA/m8bp	Acol_mar_Ele23#DNA/Tc1-Mariner	Acol_piggyBac_Ele1#DNA/PiggyBac	Acol_gypsy_Ele85#LTR/Gypsy
										Acol_mTA_Ele10#DNA/mTA	Acol_Jockey_Ele11#LINE/Jockey	Acol_CR1_Ele3#LINE/CR1	Acol_gypsy_Ele39#LTR/Gypsy	Acol_mar_Ele17#DNA/Tc1-Mariner	Acol_gypsy_Ele91#LTR/Gypsy	Acol_gypsy_Ele4#LTR/Gypsy
										Acol_Tc1_Ele17#DNA/Tc1-Mariner	Acol_hAT_Ele14#DNA/hAT	Acol_hAT_Ele8#DNA/hAT	Acol_mTA_Ele10#DNA/mTA	Acol_mar_Ele14#DNA/Tc1-Mariner	Acol_Pao_Bel_Ele70#LTR/Bel-Pao	Acol_gypsy_Ele68#LTR/Gypsy
										Acol_otherMITEs_Eles18#DNA	Acol_P_Ele12#DNA/P	Acol_P_Ele5#DNA/P	Acol_P_Ele6#DNA/P	Acol_hAT_Ele8#DNA/hAT	Acol_Pao_Bel_Ele8#LTR/Bel-Pao	Acol_CR1_Ele31#LINE/CR1
										Acol_otherMITEs_Eles8#DNA	Acol_P_Ele3#DNA/P	Acol_gambol_Ele2#DNA/Gambol	Acol_otherMITEs_Eles29#DNA	Acol_piggyBac_Ele2#DNA/PiggyBac	Acol_Pao_Bel_Ele58#LTR/Bel-Pao	Acol_gambol_Ele3#DNA/Gambol
										Acol_otherMITEs_Eles9#DNA	Acol_P_Ele2#DNA/P	Acol_m8bp_Ele2#DNA/m8bp	Acol_m8bp_Ele8#DNA/m8bp	Acol_m3bp_Ele14#DNA/m3bp	Acol_Pao_Bel_Ele7#LTR/Bel-Pao	Acol_Pao_Bel_Ele60#LTR/Bel-Pao
										Acol_RTE_Ele3#LINE/RTE	Acol_gypsy_Ele9#LTR/Gypsy	Acol_Maque_Ele1#Undetermined/Maque	Acol_gambol_Ele16#DNA/Gambol	Acol_Pao_Bel_Ele77#LTR/Bel-Pao	Acol_Pao_Bel_Ele52#LTR/Bel-Pao	Acol_m3bp_Ele22#DNA/m3bp
										Acol_Transib_Ele2#DNA/Transib	Acol_otherMITEs_Eles8#DNA	Acol_I_Ele4#LINE/I	Acol_hAT_Ele15#DNA/hAT	Acol_Pao_Bel_Ele64#LTR/Bel-Pao	Acol_Pao_Bel_Ele55#LTR/Bel-Pao	Acol_I_Ele5#LINE/I
										Acol_CR1_Ele31#LINE/CR1	Acol_otherMITEs_Eles9#DNA	Acol_Pao_Bel_Ele11#LTR/Bel-Pao	Acol_gypsy_Ele7#LTR/Gypsy	Acol_CR1_Ele20#LINE/CR1	Acol_gypsy_Ele36#LTR/Gypsy	Acol_CR1_Ele26#LINE/CR1
										Acol_Pao_Bel_Ele48#LTR/Bel-Pao	Acol_otherMITEs_Eles7#DNA	Acol_Pao_Bel_Ele45#LTR/Bel-Pao	Acol_m3bp_Ele14#DNA/m3bp	Acol_Tc1_Ele18#DNA/Tc1-Mariner	Acol_Pao_Bel_Ele53#LTR/Bel-Pao	Acol_Pao_Bel_Ele27#LTR/Bel-Pao
										Acol_m3bp_Ele23#DNA/m3bp	Acol_otherMITEs_Eles26#DNA	Acol_mTA_Ele3#DNA/mTA	Acol_m8bp_Ele6#DNA/m8bp	Acol_Pao_Bel_Ele63#LTR/Bel-Pao	Acol_gypsy_Ele37#LTR/Gypsy	Acol_Pao_Bel_Ele18#LTR/Bel-Pao
										Acol_Pao_Bel_Ele3#LTR/Bel-Pao	Acol_m3bp_Ele23#DNA/m3bp	Acol_CR1_Ele23#LINE/CR1	Acol_mTA_Ele5#DNA/mTA	Acol_CR1_Ele13#LINE/CR1	Acol_Pao_Bel_Ele64#LTR/Bel-Pao	Acol_tSINE_Ele2#SINE/tSINE
										Acol_m2bp_Ele11#DNA/mTA	Acol_m3bp_Ele12#DNA/m3bp	Acol_otherMITEs_Eles13#DNA	Acol_P_Ele2#DNA/P	Acol_hAT_Ele15#DNA/hAT	Acol_Pao_Bel_Ele77#LTR/Bel-Pao	Acol_CACTA_Ele8#DNA/CACTA
										Acol_CR1_Ele12#LINE/CR1	Acol_mTA_Ele10#DNA/mTA	Acol_Pao_Bel_Ele58#LTR/Bel-Pao	Acol_P_Ele3#DNA/P	Acol_mTA_Ele13#DNA/mTA	Acol_gypsy_Ele24#LTR/Gypsy	Acol_gypsy_Ele44#LTR/Gypsy
										Acol_Pao_Bel_Ele11#LTR/Bel-Pao	Acol_m3bp_Ele10#DNA/m3bp	Acol_hAT_Ele15#DNA/hAT	Acol_P_Ele12#DNA/P	Acol_Tc1-mar_Ele3#DNA/Tc1-Mariner	Acol_Pao_Bel_Ele19#LTR/Bel-Pao	Acol_piggyBac_Ele6#DNA/PiggyBac
										Acol_m2bp_Ele8#DNA/mTA	Acol_PIF_Ele12#DNA/PIF-Harbinger	Acol_gypsy_Ele12#LTR/Gypsy	Acol_mTA_Ele27#DNA/mTA	Acol_tSINE_Ele2#SINE/tSINE	Acol_Pao_Bel_Ele66#LTR/Bel-Pao	Acol_gypsy_Ele10#LTR/Gypsy
										Acol_mTA_Ele1#DNA/mTA	Acol_hAT_Ele8#DNA/hAT	Acol_mTA_Ele15#DNA/mTA	Acol_R1_Ele17#LINE/R1	Acol_mTA_Ele1#DNA/mTA	Acol_gypsy_Ele26#LTR/Gypsy	Acol_mTA_Ele19#DNA/mTA
										Acol_PIF_Ele5#DNA/PIF-Harbinger	Acol_Tc1-mar_Ele8#DNA/Tc1-Mariner	Acol_otherMITEs_Eles101#DNA	Acol_m2bp_Ele10#DNA/mTA	Acol_mTA_Ele15#DNA/mTA	Acol_Tc1_Ele18#DNA/Tc1-Mariner	Acol_m3bp_Ele17#DNA/m3bp
										Acol_m3bp_Ele12#DNA/m3bp	Acol_P_Ele14#DNA/P	Acol_copia_Ele10#LTR/Copia	Acol_mTA_Ele29#DNA/mTA	Acol_m3bp_Ele10#DNA/m3bp	Acol_gypsy_Ele3#LTR/Gypsy	Acol_otherMITEs_Eles28#DNA
										Acol_m3bp_Ele9#DNA/m3bp	Acol_gypsy_Ele69#LTR/Gypsy	Acol_P_Ele6#DNA/P	Acol_LTR_Ele4#LTR	Acol_CR1_Ele4#LINE/CR1	Acol_gypsy_Ele67#LTR/Gypsy	Acol_m8bp_Ele8#DNA/m8bp
										Acol_otherMITEs_Eles11#DNA	Acol_L1_Ele5#LINE/L1	Acol_Tc1_Ele18#DNA/Tc1-Mariner	Acol_CR1_Ele9#LINE/CR1	Acol_copia_Ele24#LTR/Copia	Acol_gypsy_Ele5#LTR/Gypsy	Acol_Pao_Bel_Ele81#LTR/Bel-Pao
										Acol_gypsy_Ele18#LTR/Gypsy	Acol_mTA_Ele31#DNA/mTA	Acol_PIF_Ele12#DNA/PIF-Harbinger	Acol_gypsy_Ele9#LTR/Gypsy	Acol_copia_Ele4#LTR/Copia	Acol_m3bp_Ele2#DNA/m3bp	Acol_CR1_Ele9#LINE/CR1
										Acol_otherMITEs_Eles24#DNA	Acol_m8bp_Ele2#DNA/m8bp	Acol_m3bp_Ele25#DNA/m3bp	Acol_hAT_Ele14#DNA/hAT	Acol_gypsy_Ele60#LTR/Gypsy	Acol_otherMITEs_Eles25#DNA	Acol_Tc1-mar_Ele11#DNA/Tc1-Mariner
										Acol_Jockey_Ele11#LINE/Jockey	Acol_mTA_Ele21#DNA/mTA	Acol_mTA_Ele1#DNA/mTA	Acol_m2bp_Ele1#DNA/mTA	Acol_Jockey_Ele12#LINE/Jockey	Acol_mTA_Ele12#DNA/mTA	Acol_Tc1-mar_Ele4#DNA/Tc1-Mariner
										Acol_Jockey_Ele28#LINE/Jockey	Acol_m2bp_Ele5#DNA/mTA	Acol_Pao_Bel_Ele77#LTR/Bel-Pao	Acol_otherMITEs_Eles18#DNA	Acol_gypsy_Ele4#LTR/Gypsy	Acol_mTA_Ele21#DNA/mTA	Acol_m3bp_Ele25#DNA/m3bp
										Acol_Jockey_Ele27#LINE/Jockey	Acol_CR1_Ele8#LINE/CR1	Acol_Pao_Bel_Ele64#LTR/Bel-Pao	Acol_mTA_Ele15#DNA/mTA	Acol_gypsy_Ele92#LTR/Gypsy	Acol_gypsy_Ele69#LTR/Gypsy	Acol_m3bp_Ele15#DNA/m3bp
										Acol_gypsy_Ele26#LTR/Gypsy	Acol_Pao_Bel_Ele8#LTR/Bel-Pao	Acol_mTA_Ele10#DNA/mTA	Acol_m3bp_Ele12#DNA/m3bp	Acol_Pao_Bel_Ele11#LTR/Bel-Pao	Acol_m3bp_Ele15#DNA/m3bp	Acol_PIF_Ele5#DNA/PIF-Harbinger
										Acol_mTA_Ele23#DNA/mTA	Acol_Pao_Bel_Ele77#LTR/Bel-Pao	Acol_m3bp_Ele14#DNA/m3bp	Acol_hAT_Ele8#DNA/hAT	Acol_m3bp_Ele7#DNA/m3bp	Acol_m3bp_Ele24#DNA/m3bp	Acol_mTA_Ele15#DNA/mTA
										Acol_LTR_Ele4#LTR	Acol_Pao_Bel_Ele64#LTR/Bel-Pao	Acol_m4bp_Ele3#DNA/m4bp	Acol_copia_Ele24#LTR/Copia	Acol_Pao_Bel_Ele80#LTR/Bel-Pao	Acol_mTA_Ele19#DNA/mTA	Acol_mTA_Ele21#DNA/mTA
										Acol_LTR_Ele1#LTR	Acol_Tc1_Ele15#DNA/Tc1-Mariner	Acol_piggyBac_Ele4#DNA/PiggyBac	Acol_copia_Ele4#LTR/Copia	Acol_Pao_Bel_Ele53#LTR/Bel-Pao	Acol_mTA_Ele20#DNA/mTA	Acol_mTA_Ele12#DNA/mTA
										Acol_copia_Ele24#LTR/Copia	Acol_gypsy_Ele13#LTR/Gypsy	Acol_gambol_Ele3#DNA/Gambol	Acol_Pao_Bel_Ele45#LTR/Bel-Pao	Acol_Pao_Bel_Ele13#LTR/Bel-Pao	Acol_P_Ele4#DNA/P	Acol_m2bp_Ele5#DNA/mTA
										Acol_copia_Ele4#LTR/Copia	Acol_mTA_Ele3#DNA/mTA	Acol_m3bp_Ele22#DNA/m3bp	Acol_otherMITEs_Eles8#DNA	Acol_gambol_Ele14#DNA/Gambol	Acol_PIF_Ele5#DNA/PIF-Harbinger	Acol_mTA_Ele20#DNA/mTA
										Acol_P_Ele3#DNA/P	Acol_mTA_Ele5#DNA/mTA	Acol_CR1_Ele25#LINE/CR1	Acol_m3bp_Ele25#DNA/m3bp	Acol_gypsy_Ele53#LTR/Gypsy	Acol_m8bp_Ele12#DNA/m8bp	Acol_P_Ele3#DNA/P
										Acol_P_Ele12#DNA/P	Acol_gypsy_Ele60#LTR/Gypsy	Acol_RTE_Ele1#LINE/RTE	Acol_Tc1-mar_Ele2#DNA/Tc1-Mariner	Acol_CACTA_Ele6#DNA/CACTA	Acol_P_Ele8#DNA/P	Acol_P_Ele12#DNA/P
										Acol_hAT_Ele13#DNA/hAT	Acol_Pao_Bel_Ele2#LTR/Bel-Pao	Acol_Tc1_Ele3#DNA/Tc1-Mariner	Acol_Pao_Bel_Ele80#LTR/Bel-Pao	Acol_copia_Ele13#LTR/Copia	Acol_mTA_Ele13#DNA/mTA	Acol_mTA_Ele13#DNA/mTA
										Acol_mTA_Ele15#DNA/mTA	Acol_gypsy_Ele5#LTR/Gypsy	Acol_Pao_Bel_Ele57#LTR/Bel-Pao	Acol_Pao_Bel_Ele53#LTR/Bel-Pao	Acol_P_Ele8#DNA/P	Acol_mTA_Ele30#DNA/mTA	Acol_m3bp_Ele12#DNA/m3bp
										Acol_gypsy_Ele92#LTR/Gypsy	Acol_otherMITEs_Eles28#DNA	Acol_Pao_Bel_Ele55#LTR/Bel-Pao	Acol_gypsy_Ele26#LTR/Gypsy	Acol_copia_Ele28#LTR/Copia	Acol_PIF_Ele4#DNA/PIF-Harbinger	Acol_mTA_Ele9#DNA/mTA
										Acol_otherMITEs_Eles25#DNA	Acol_m2bp_Ele10#DNA/mTA	Acol_gypsy_Ele48#LTR/Gypsy	Acol_Tc1_Ele1#DNA/Tc1-Mariner	Acol_copia_Ele2#LTR/Copia	Acol_mTA_Ele9#DNA/mTA	Acol_PIF_Ele12#DNA/PIF-Harbinger
										Acol_Pao_Bel_Ele8#LTR/Bel-Pao	Acol_Tc1_Ele17#DNA/Tc1-Mariner	Acol_Pao_Bel_Ele65#LTR/Bel-Pao	Acol_gypsy_Ele59#LTR/Gypsy	Acol_Pao_Bel_Ele37#LTR/Bel-Pao	Acol_otherMITEs_Eles27#DNA	Acol_m8bp_Ele12#DNA/m8bp
										Acol_Tc1-mar_Ele2#DNA/Tc1-Mariner	Acol_m4bp_Ele3#DNA/m4bp	Acol_gypsy_Ele82#LTR/Gypsy	Acol_gypsy_Ele11#LTR/Gypsy	Acol_CR1_Ele27#LINE/CR1	Acol_m3bp_Ele25#DNA/m3bp	Acol_m3bp_Ele9#DNA/m3bp
										Acol_m3bp_Ele25#DNA/m3bp	Acol_piggyBac_Ele4#DNA/PiggyBac	Acol_tSINE_Ele2#SINE/tSINE	Acol_hAT_Ele12#DNA/hAT	Acol_Pao_Bel_Ele58#LTR/Bel-Pao	Acol_m3bp_Ele12#DNA/m3bp	Acol_m3bp_Ele6#DNA/m3bp
										Acol_Tc1_Ele19#DNA/Tc1-Mariner	Acol_otherMITEs_Eles25#DNA	Acol_copia_Ele15#LTR/Copia	Acol_gypsy_Ele82#LTR/Gypsy	Acol_L1_Ele8#LINE/L1	Acol_otherMITEs_Eles21#DNA	Acol_m3bp_Ele23#DNA/m3bp
										Acol_Tc1_Ele4#DNA/Tc1-Mariner	Acol_P_Ele5#DNA/P	Acol_otherMITEs_Eles29#DNA	Acol_hAT_Ele13#DNA/hAT	Acol_otherMITEs_Eles30#LINE	Acol_Pao_Bel_Ele48#LTR/Bel-Pao	Acol_P_Ele6#DNA/P
										Acol_mar_Ele15#DNA/Tc1-Mariner	Acol_hAT_Ele15#DNA/hAT	Acol_Jockey_Ele14#LINE/Jockey	Acol_m3bp_Ele7#DNA/m3bp	Acol_Pao_Bel_Ele56#LTR/Bel-Pao	Acol_m3bp_Ele6#DNA/m3bp	Acol_mTA_Ele1#DNA/mTA
										Acol_mar_Ele23#DNA/Tc1-Mariner	Acol_RTE_Ele3#LINE/RTE	Acol_gypsy_Ele14#LTR/Gypsy	Acol_Pao_Bel_Ele11#LTR/Bel-Pao	Acol_gypsy_Ele57#LTR/Gypsy	Acol_gambol_Ele16#DNA/Gambol	Acol_m8bp_Ele2#DNA/m8bp
										Acol_mar_Ele17#DNA/Tc1-Mariner	Acol_gypsy_Ele20#LTR/Gypsy	Acol_gypsy_Ele93#LTR/Gypsy	Acol_otherMITEs_Eles28#DNA	Acol_gambol_Ele5#DNA/Gambol	Acol_m8bp_Ele6#DNA/m8bp	Acol_mTA_Ele10#DNA/mTA
										Acol_mar_Ele14#DNA/Tc1-Mariner	Acol_LTR_Ele2#LTR	Acol_gypsy_Ele63#LTR/Gypsy	Acol_CR1_Ele31#LINE/CR1	Acol_Jockey_Ele22#LINE/Jockey	Acol_Tc1-mar_Ele2#DNA/Tc1-Mariner	Acol_m4bp_Ele4#DNA/m4bp
										Acol_CR1_Ele3#LINE/CR1	Acol_Jockey_Ele3#LINE/Jockey	Acol_Tc1-mar_Ele9#DNA/Tc1-Mariner	Acol_otherMITEs_Eles1#DNA	Acol_Tc1-mar_Ele1#DNA/Tc1-Mariner	Acol_otherMITEs_Eles11#DNA	Acol_gambol_Ele16#DNA/Gambol
										Acol_m2bp_Ele3#DNA/mTA	Acol_Tc1_Ele16#DNA/Tc1-Mariner	Acol_otherMITEs_Eles28#DNA	Acol_gypsy_Ele79#LTR/Gypsy	Acol_CR1_Ele12#LINE/CR1	Acol_Pao_Bel_Ele10#LTR/Bel-Pao	Acol_m8bp_Ele6#DNA/m8bp
										Acol_otherMITEs_Eles1#DNA	Acol_Pao_Bel_Ele81#LTR/Bel-Pao	Acol_Pao_Bel_Ele13#LTR/Bel-Pao	Acol_gypsy_Ele13#LTR/Gypsy	Acol_m3bp_Ele17#DNA/m3bp	Acol_Tc1-mar_Ele10#DNA/Tc1-Mariner	Acol_m2bp_Ele3#DNA/mTA
										Acol_PIF_Ele12#DNA/PIF-Harbinger	Acol_Pao_Bel_Ele49#LTR/Bel-Pao	Acol_gypsy_Ele88#LTR/Gypsy	Acol_CR1_Ele13#LINE/CR1	Acol_CR1_Ele19#LINE/CR1	Acol_Tc1_Ele16#DNA/Tc1-Mariner	Acol_Tc1-mar_Ele2#DNA/Tc1-Mariner
										Acol_m3bp_Ele10#DNA/m3bp	Acol_CR1_Ele4#LINE/CR1	Acol_piggyBac_Ele2#DNA/PiggyBac	Acol_m2bp_Ele8#DNA/mTA	Acol_L2_Ele4#LINE/L2	Acol_Tc1_Ele19#DNA/Tc1-Mariner	Acol_Tc1_Ele18#DNA/Tc1-Mariner
										Acol_m3bp_Ele6#DNA/m3bp	Acol_CACTA_Ele6#DNA/CACTA	Acol_RTE_Ele2#LINE/RTE	Acol_m3bp_Ele19#DNA/m3bp	Acol_L2_Ele3#LINE/L2	Acol_Tc1_Ele4#DNA/Tc1-Mariner	Acol_P_Ele2#DNA/P
										Acol_m8bp_Ele12#DNA/m8bp	Acol_CR1_Ele19#LINE/CR1	Acol_R1_Ele4#LINE/R1	Acol_Pao_Bel_Ele69#LTR/Bel-Pao	Acol_Jockey_Ele1#LINE/Jockey	Acol_otherMITEs_Eles18#DNA	Acol_mTA_Ele6#DNA/mTA
										Acol_P_Ele8#DNA/P	Acol_L1_Ele8#LINE/L1	Acol_P_Ele12#DNA/P	Acol_CR1_Ele4#LINE/CR1	Acol_gypsy_Ele93#LTR/Gypsy	Acol_hAT_Ele14#DNA/hAT	Acol_mTA_Ele28#DNA/mTA
										Acol_Tc1-mar_Ele3#DNA/Tc1-Mariner	Acol_gambol_Ele16#DNA/Gambol	Acol_Pao_Bel_Ele30#LTR/Bel-Pao	Acol_Pao_Bel_Ele78#LTR/Bel-Pao	Acol_Tc1-mar_Ele5#DNA/Tc1-Mariner	Acol_mTA_Ele31#DNA/mTA	Acol_gambol_Ele2#DNA/Gambol
										Acol_Pao_Bel_Ele72#LTR/Bel-Pao	Acol_gambol_Ele7#DNA/Gambol	Acol_helitron_Ele1#DNA/Helitron	Acol_mTA_Ele6#DNA/mTA	Acol_gambol_Ele1#DNA/Gambol	Acol_m2bp_Ele3#DNA/mTA	Acol_m2bp_Ele11#DNA/mTA
										Acol_Jockey_Ele18#LINE/Jockey	Acol_gypsy_Ele78#LTR/Gypsy	Acol_Jockey_Ele6#LINE/Jockey	Acol_mTA_Ele28#DNA/mTA	Acol_Pao_Bel_Ele72#LTR/Bel-Pao	Acol_PIF_Ele6#DNA/PIF-Harbinger	Acol_CR1_Ele7#LINE/CR1
										Acol_P_Ele4#DNA/P	Acol_mTA_Ele27#DNA/mTA	Acol_Jockey_Ele18#LINE/Jockey	Acol_gypsy_Ele35#LTR/Gypsy	Acol_gypsy_Ele82#LTR/Gypsy	Acol_Jockey_Ele11#LINE/Jockey	Acol_CR1_Ele20#LINE/CR1
										Acol_Pao_Bel_Ele74#LTR/Bel-Pao	Acol_R1_Ele4#LINE/R1	Acol_PIF_Ele1#DNA/PIF-Harbinger	Acol_Jockey_Ele21#LINE/Jockey	Acol_Pao_Bel_Ele30#LTR/Bel-Pao	Acol_Pao_Bel_Ele13#LTR/Bel-Pao	Acol_P_Ele8#DNA/P
										Acol_Jockey_Ele23#LINE/Jockey	Acol_Outcast_Ele7#LINE/Outcast	Acol_gypsy_Ele13#LTR/Gypsy	Acol_mTA_Ele23#DNA/mTA		Acol_mTA_Ele1#DNA/mTA	Acol_Pao_Bel_Ele11#LTR/Bel-Pao
										Acol_mTA_Ele17#DNA/mTA	Acol_Pao_Bel_Ele66#LTR/Bel-Pao	Acol_Tc1-mar_Ele10#DNA/Tc1-Mariner	Acol_m2bp_Ele11#DNA/mTA		Acol_mar_Ele15#DNA/Tc1-Mariner	Acol_Tc1_Ele17#DNA/Tc1-Mariner
										Acol_gypsy_Ele88#LTR/Gypsy	Acol_copia_Ele6#LTR/Copia	Acol_CACTA_Ele4#DNA/CACTA	Acol_m2bp_Ele5#DNA/mTA		Acol_mar_Ele23#DNA/Tc1-Mariner	Acol_gypsy_Ele90#LTR/Gypsy
										Acol_otherMITEs_Eles20#DNA	Acol_gypsy_Ele40#LTR/Gypsy	Acol_CACTA_Ele7#DNA/CACTA	Acol_gypsy_Ele36#LTR/Gypsy		Acol_mar_Ele17#DNA/Tc1-Mariner	Acol_hAT_Ele15#DNA/hAT
										Acol_Jockey_Ele26#LINE/Jockey	Acol_Pao_Bel_Ele21#LTR/Bel-Pao	Acol_gambol_Ele16#DNA/Gambol	Acol_gypsy_Ele37#LTR/Gypsy		Acol_mar_Ele14#DNA/Tc1-Mariner	Acol_m3bp_Ele2#DNA/m3bp
										Acol_CR1_Ele4#LINE/CR1	Acol_Loner_Ele1#LINE/Loner	Acol_Pao_Bel_Ele79#LTR/Bel-Pao	Acol_P_Ele14#DNA/P		Acol_hAT_Ele15#DNA/hAT	Acol_m3bp_Ele24#DNA/m3bp
										Acol_gypsy_Ele41#LTR/Gypsy	Acol_gypsy_Ele71#LTR/Gypsy	Acol_P_Ele7#DNA/P	Acol_otherMITEs_Eles21#DNA		Acol_m3bp_Ele10#DNA/m3bp	Acol_Pao_Bel_Ele38#LTR/Bel-Pao
										Acol_hAT_Ele6#DNA/hAT	Acol_P_Ele9#DNA/P	Acol_gypsy_Ele31#LTR/Gypsy	Acol_otherMITEs_Eles25#DNA		Acol_otherMITEs_Eles15#DNA	Acol_gambol_Ele12#DNA/Gambol
										Acol_Outcast_Ele4#LINE/Outcast	Acol_otherMITEs_Eles23#DNA	Acol_CACTA_Ele5#DNA/CACTA	Acol_m8bp_Ele12#DNA/m8bp		Acol_m8bp_Ele8#DNA/m8bp	Acol_gypsy_Ele36#LTR/Gypsy
										Acol_gypsy_Ele13#LTR/Gypsy	Acol_otherMITEs_Eles24#DNA	Acol_P_Ele2#DNA/P	Acol_mar_Ele15#DNA/Tc1-Mariner		Acol_gambol_Ele12#DNA/Gambol	Acol_gypsy_Ele37#LTR/Gypsy
										Acol_copia_Ele21#LTR/Copia	Acol_L2_Ele4#LINE/L2	Acol_P_Ele3#DNA/P	Acol_mar_Ele23#DNA/Tc1-Mariner		Acol_mTA_Ele23#DNA/mTA	Acol_m3bp_Ele14#DNA/m3bp
										Acol_Outcast_Ele8#LINE/Outcast	Acol_L2_Ele3#LINE/L2	Acol_Tc1-mar_Ele1#DNA/Tc1-Mariner	Acol_mar_Ele17#DNA/Tc1-Mariner		Acol_Transib_Ele2#DNA/Transib	Acol_Pao_Bel_Ele24#LTR/Bel-Pao
										Acol_copia_Ele6#LTR/Copia	Acol_otherMITEs_Eles20#DNA	Acol_gypsy_Ele60#LTR/Gypsy	Acol_gypsy_Ele71#LTR/Gypsy		Acol_PIF_Ele8#DNA/PIF-Harbinger	Acol_m4bp_Ele3#DNA/m4bp
										Acol_Outcast_Ele7#LINE/Outcast	Acol_gypsy_Ele52#LTR/Gypsy	Acol_gypsy_Ele51#LTR/Gypsy	Acol_gypsy_Ele10#LTR/Gypsy		Acol_otherMITEs_Eles19#DNA	Acol_piggyBac_Ele4#DNA/PiggyBac
										Acol_Pao_Bel_Ele76#LTR/Bel-Pao	Acol_gypsy_Ele89#LTR/Gypsy	Acol_gypsy_Ele94#LTR/Gypsy	Acol_gypsy_Ele42#LTR/Gypsy		Acol_Tc1-mar_Ele8#DNA/Tc1-Mariner	Acol_gypsy_Ele61#LTR/Gypsy
										Acol_Tc1-mar_Ele9#DNA/Tc1-Mariner	Acol_gypsy_Ele58#LTR/Gypsy	Acol_Pao_Bel_Ele28#LTR/Bel-Pao	Acol_I_Ele2#LINE/I		Acol_m8bp_Ele2#DNA/m8bp	Acol_R1_Ele1#LINE/R1
										Acol_gypsy_Ele52#LTR/Gypsy	Acol_hAT_Ele9#DNA/hAT	Acol_Pao_Bel_Ele38#LTR/Bel-Pao	Acol_copia_Ele5#LTR/Copia		Acol_Tc1_Ele17#DNA/Tc1-Mariner	Acol_gypsy_Ele45#LTR/Gypsy
										Acol_gypsy_Ele79#LTR/Gypsy	Acol_LTR_Ele4#LTR	Acol_gypsy_Ele78#LTR/Gypsy	Acol_CACTA_Ele1#DNA/CACTA		Acol_CR1_Ele8#LINE/CR1	Acol_copia_Ele13#LTR/Copia
										Acol_Pao_Bel_Ele60#LTR/Bel-Pao	Acol_PIF_Ele7#DNA/PIF-Harbinger	Acol_gypsy_Ele36#LTR/Gypsy	Acol_Pao_Bel_Ele62#LTR/Bel-Pao		Acol_otherMITEs_Eles22#DNA	Acol_gypsy_Ele53#LTR/Gypsy
										Acol_m3bp_Ele22#DNA/m3bp	Acol_gypsy_Ele48#LTR/Gypsy	Acol_gypsy_Ele37#LTR/Gypsy	Acol_m2bp_Ele3#DNA/mTA		Acol_m2bp_Ele5#DNA/mTA	Acol_gypsy_Ele20#LTR/Gypsy
										Acol_Tc1-mar_Ele8#DNA/Tc1-Mariner	Acol_Pao_Bel_Ele69#LTR/Bel-Pao	Acol_copia_Ele7#LTR/Copia	Acol_otherMITEs_Eles17#DNA		Acol_m3bp_Ele9#DNA/m3bp	Acol_otherMITEs_Eles29#DNA
										Acol_otherMITEs_Eles28#DNA	Acol_copia_Ele8#LTR/Copia		Acol_Pao_Bel_Ele7#LTR/Bel-Pao		Acol_gypsy_Ele90#LTR/Gypsy	Acol_Tc1-mar_Ele1#DNA/Tc1-Mariner
										Acol_gypsy_Ele10#LTR/Gypsy	Acol_gypsy_Ele6#LTR/Gypsy		Acol_Pao_Bel_Ele56#LTR/Bel-Pao		Acol_otherMITEs_Eles12#DNA	Acol_CR1_Ele2#LINE/CR1
										Acol_gypsy_Ele59#LTR/Gypsy	Acol_Pao_Bel_Ele78#LTR/Bel-Pao		Acol_Pao_Bel_Ele70#LTR/Bel-Pao		Acol_otherMITEs_Eles29#DNA	Acol_mTA_Ele3#DNA/mTA
										Acol_R1_Ele5#LINE/R1	Acol_R1_Ele17#LINE/R1		Acol_P_Ele11#DNA/P		Acol_Jockey_Ele15#LINE/Jockey	Acol_gypsy_Ele35#LTR/Gypsy
										Acol_R1_Ele3#LINE/R1	Acol_Pao_Bel_Ele57#LTR/Bel-Pao		Acol_otherMITEs_Eles20#DNA		Acol_gypsy_Ele18#LTR/Gypsy	Acol_otherMITEs_Eles12#DNA
										Acol_gypsy_Ele20#LTR/Gypsy	Acol_CR1_Ele27#LINE/CR1		Acol_Outcast_Ele2#LINE/Outcast		Acol_otherMITEs_Eles26#DNA	Acol_Tc1-mar_Ele8#DNA/Tc1-Mariner
										Acol_otherMITEs_Eles26#DNA	Acol_L1_Ele7#LINE/L1		Acol_otherMITEs_Eles16#DNA		Acol_CR1_Ele21#LINE/CR1	Acol_m4bp_Ele1#DNA/m4bp
										Acol_copia_Ele13#LTR/Copia	Acol_Loner_Ele3#LINE/Loner		Acol_Pao_Bel_Ele8#LTR/Bel-Pao		Acol_gypsy_Ele78#LTR/Gypsy	Acol_m3bp_Ele10#DNA/m3bp
										Acol_Pao_Bel_Ele58#LTR/Bel-Pao	Acol_piggyBac_Ele6#DNA/PiggyBac		Acol_Pao_Bel_Ele67#LTR/Bel-Pao		Acol_copia_Ele10#LTR/Copia	Acol_gypsy_Ele14#LTR/Gypsy
										Acol_Outcast_Ele6#LINE/Outcast	Acol_Pao_Bel_Ele28#LTR/Bel-Pao		Acol_otherMITEs_Eles15#DNA		Acol_gypsy_Ele82#LTR/Gypsy	Acol_copia_Ele25#LTR/Copia
										Acol_Loner_Ele1#LINE/Loner	Acol_gambol_Ele14#DNA/Gambol		Acol_CR1_Ele19#LINE/CR1		Acol_gypsy_Ele25#LTR/Gypsy	Acol_Tc1_Ele16#DNA/Tc1-Mariner
										Acol_PIF_Ele10#DNA/PIF-Harbinger	Acol_otherMITEs_Eles19#DNA		Acol_Tc1_Ele3#DNA/Tc1-Mariner		Acol_CR1_Ele27#LINE/CR1	Acol_LTR_Ele1#LTR
										Acol_PIF_Ele11#DNA/PIF-Harbinger	Acol_m2bp_Ele2#DNA/mTA		Acol_P_Ele10#DNA/P		Acol_P_Ele14#DNA/P	Acol_LTR_Ele4#LTR
										Acol_CACTA_Ele8#DNA/CACTA	Acol_copia_Ele13#LTR/Copia		Acol_PIF_Ele3#DNA/PIF-Harbinger		Acol_Loner_Ele2#LINE/Loner	Acol_Pao_Bel_Ele30#LTR/Bel-Pao
										Acol_Pao_Bel_Ele52#LTR/Bel-Pao	Acol_gypsy_Ele53#LTR/Gypsy		Acol_otherMITEs_Eles4#DNA		Acol_otherMITEs_Eles10#DNA	Acol_Pao_Bel_Ele49#LTR/Bel-Pao
										Acol_L1_Ele4#LINE/L1	Acol_CR1_Ele22#LINE/CR1		Acol_gypsy_Ele57#LTR/Gypsy		Acol_P_Ele6#DNA/P	Acol_hAT_Ele14#DNA/hAT
										Acol_P_Ele2#DNA/P	Acol_otherMITEs_Eles4#DNA		Acol_m3bp_Ele27#DNA/m3bp		Acol_mTA_Ele3#DNA/mTA	Acol_Pao_Bel_Ele80#LTR/Bel-Pao
										Acol_Jockey_Ele12#LINE/Jockey	Acol_CR1_Ele30#LINE/CR1		Acol_Pao_Bel_Ele55#LTR/Bel-Pao		Acol_mTA_Ele5#DNA/mTA	Acol_otherMITEs_Eles4#DNA
										Acol_CR1_Ele19#LINE/CR1	Acol_gypsy_Ele84#LTR/Gypsy		Acol_CACTA_Ele5#DNA/CACTA		Acol_RTE_Ele1#LINE/RTE	Acol_Jockey_Ele11#LINE/Jockey
										Acol_Loner_Ele2#LINE/Loner	Acol_otherMITEs_Eles2#DNA		Acol_PIF_Ele11#DNA/PIF-Harbinger		Acol_Tc1-mar_Ele4#DNA/Tc1-Mariner	Acol_Jockey_Ele27#LINE/Jockey
										Acol_Pao_Bel_Ele68#LTR/Bel-Pao	Acol_gambol_Ele10#DNA/Gambol		Acol_otherMITEs_Eles19#DNA		Acol_Tc1-mar_Ele11#DNA/Tc1-Mariner	Acol_Jockey_Ele28#LINE/Jockey
										Acol_Pao_Bel_Ele25#LTR/Bel-Pao	Acol_gypsy_Ele42#LTR/Gypsy		Acol_gypsy_Ele83#LTR/Gypsy		Acol_mTA_Ele10#DNA/mTA	Acol_P_Ele13#DNA/P
										Acol_gypsy_Ele73#LTR/Gypsy	Acol_gypsy_Ele79#LTR/Gypsy		Acol_Jockey_Ele14#LINE/Jockey		Acol_CR1_Ele12#LINE/CR1	Acol_gypsy_Ele92#LTR/Gypsy
										Acol_copia_Ele5#LTR/Copia	Acol_gypsy_Ele41#LTR/Gypsy		Acol_CR1_Ele8#LINE/CR1		Acol_CR1_Ele15#LINE/CR1	Acol_mTA_Ele30#DNA/mTA
										Acol_copia_Ele8#LTR/Copia	Acol_Pao_Bel_Ele5#LTR/Bel-Pao		Acol_P_Ele9#DNA/P		Acol_R1_Ele17#LINE/R1	Acol_L1_Ele6#LINE/L1
										Acol_R1_Ele15#LINE/R1	Acol_R1_Ele16#LINE/R1		Acol_Loner_Ele3#LINE/Loner		Acol_R1_Ele4#LINE/R1	Acol_Outcast_Ele8#LINE/Outcast
										Acol_gypsy_Ele62#LTR/Gypsy	Acol_Pao_Bel_Ele9#LTR/Bel-Pao		Acol_Tc1_Ele17#DNA/Tc1-Mariner		Acol_Outcast_Ele1#LINE/Outcast	Acol_piggyBac_Ele2#DNA/PiggyBac
										Acol_Pao_Bel_Ele66#LTR/Bel-Pao	Acol_CR1_Ele1#LINE/CR1		Acol_gypsy_Ele63#LTR/Gypsy		Acol_Pao_Bel_Ele32#LTR/Bel-Pao	Acol_Pao_Bel_Ele31#LTR/Bel-Pao
										Acol_Jockey_Ele17#LINE/Jockey	Acol_m2bp_Ele3#DNA/mTA		Acol_Pao_Bel_Ele50#LTR/Bel-Pao		Acol_Jockey_Ele24#LINE/Jockey	Acol_Pao_Bel_Ele51#LTR/Bel-Pao
										Acol_Jockey_Ele1#LINE/Jockey	Acol_RTE_Ele1#LINE/RTE		Acol_Jockey_Ele18#LINE/Jockey		Acol_Tc1-mar_Ele6#DNA/Tc1-Mariner	Acol_CACTA_Ele2#DNA/CACTA
										Acol_otherMITEs_Eles13#DNA	Acol_otherMITEs_Eles21#DNA		Acol_Pao_Bel_Ele9#LTR/Bel-Pao		Acol_gypsy_Ele89#LTR/Gypsy	Acol_CACTA_Ele6#DNA/CACTA
										Acol_CR1_Ele17#LINE/CR1	Acol_Pao_Bel_Ele74#LTR/Bel-Pao		Acol_Maque_Ele1#Undetermined/Maque		Acol_gambol_Ele14#DNA/Gambol	Acol_gypsy_Ele71#LTR/Gypsy
										Acol_gambol_Ele2#DNA/Gambol	Acol_Jockey_Ele19#LINE/Jockey		Acol_I_Ele4#LINE/I		Acol_gypsy_Ele6#LTR/Gypsy	Acol_Pao_Bel_Ele8#LTR/Bel-Pao
										Acol_I_Ele6#LINE/I	Acol_otherMITEs_Eles18#DNA		Acol_gypsy_Ele95#LTR/Gypsy		Acol_Pao_Bel_Ele69#LTR/Bel-Pao	Acol_Outcast_Ele4#LINE/Outcast
										Acol_m3bp_Ele21#DNA/m3bp	Acol_R1_Ele14#LINE/R1		Acol_Outcast_Ele1#LINE/Outcast		Acol_otherMITEs_Eles30#LINE	Acol_gypsy_Ele41#LTR/Gypsy
										Acol_m8bp_Ele5#DNA/m8bp	Acol_R1_Ele12#LINE/R1		Acol_P_Ele13#DNA/P		Acol_CR1_Ele17#LINE/CR1	Acol_gypsy_Ele34#LTR/Gypsy
										Acol_m8bp_Ele3#DNA/m8bp	Acol_Tc1_Ele20#DNA/Tc1-Mariner		Acol_R1_Ele4#LINE/R1		Acol_gambol_Ele3#DNA/Gambol	Acol_gambol_Ele14#DNA/Gambol
										Acol_Tc1-mar_Ele5#DNA/Tc1-Mariner	Acol_mar_Ele19#DNA/Tc1-Mariner		Acol_CACTA_Ele4#DNA/CACTA		Acol_copia_Ele8#LTR/Copia	Acol_Jockey_Ele25#LINE/Jockey
										Acol_gambol_Ele1#DNA/Gambol	Acol_gambol_Ele12#DNA/Gambol		Acol_Jockey_Ele7#LINE/Jockey		Acol_L2_Ele4#LINE/L2	Acol_Jockey_Ele17#LINE/Jockey
										Acol_Tc1-mar_Ele1#DNA/Tc1-Mariner	Acol_otherMITEs_Eles13#DNA		Acol_m3bp_Ele21#DNA/m3bp		Acol_L2_Ele3#LINE/L2	Acol_gypsy_Ele13#LTR/Gypsy
										Acol_Tc1_Ele16#DNA/Tc1-Mariner	Acol_piggyBac_Ele2#DNA/PiggyBac		Acol_copia_Ele8#LTR/Copia		Acol_otherMITEs_Eles7#DNA	Acol_Tc1_Ele20#DNA/Tc1-Mariner
										Acol_gambol_Ele14#DNA/Gambol	Acol_R1_Ele7#LINE/R1		Acol_copia_Ele26#LTR/Copia		Acol_Pao_Bel_Ele44#LTR/Bel-Pao	Acol_mar_Ele19#DNA/Tc1-Mariner
										Acol_CR1_Ele8#LINE/CR1	Acol_R1_Ele3#LINE/R1		Acol_gypsy_Ele93#LTR/Gypsy		Acol_hAT_Ele9#DNA/hAT	Acol_Pao_Bel_Ele69#LTR/Bel-Pao
										Acol_copia_Ele12#LTR/Copia	Acol_Tc1-mar_Ele1#DNA/Tc1-Mariner		Acol_I_Ele5#LINE/I		Acol_copia_Ele25#LTR/Copia	Acol_m8bp_Ele11#DNA/m8bp
										Acol_Pao_Bel_Ele73#LTR/Bel-Pao	Acol_Pao_Bel_Ele43#LTR/Bel-Pao		Acol_R1_Ele16#LINE/R1		Acol_gypsy_Ele31#LTR/Gypsy	Acol_mar_Ele29#DNA/Tc1-Mariner
										Acol_gypsy_Ele77#LTR/Gypsy	Acol_R1_Ele5#LINE/R1		Acol_CR1_Ele28#LINE/CR1		Acol_L1_Ele5#LINE/L1	Acol_mar_Ele30#DNA/Tc1-Mariner
										Acol_gypsy_Ele93#LTR/Gypsy	Acol_otherMITEs_Eles16#DNA		Acol_Pao_Bel_Ele60#LTR/Bel-Pao		Acol_Pao_Bel_Ele80#LTR/Bel-Pao	Acol_mar_Ele26#DNA/Tc1-Mariner
										Acol_gypsy_Ele60#LTR/Gypsy	Acol_gypsy_Ele12#LTR/Gypsy		Acol_Jockey_Ele26#LINE/Jockey		Acol_CACTA_Ele2#DNA/CACTA	Acol_CACTA_Ele3#DNA/CACTA
										Acol_gypsy_Ele80#LTR/Gypsy	Acol_copia_Ele10#LTR/Copia		Acol_PIF_Ele7#DNA/PIF-Harbinger		Acol_Loner_Ele3#LINE/Loner	Acol_copia_Ele5#LTR/Copia
										Acol_LTR_Ele5#LTR	Acol_gypsy_Ele15#LTR/Gypsy		Acol_Pao_Bel_Ele15#LTR/Bel-Pao		Acol_PIF_Ele2#DNA/PIF-Harbinger	Acol_gypsy_Ele19#LTR/Gypsy
										Acol_gypsy_Ele75#LTR/Gypsy			Acol_gypsy_Ele41#LTR/Gypsy		Acol_gypsy_Ele40#LTR/Gypsy	Acol_P_Ele4#DNA/P
													Acol_gypsy_Ele60#LTR/Gypsy		Acol_L1_Ele6#LINE/L1	Acol_gypsy_Ele91#LTR/Gypsy
													Acol_copia_Ele2#LTR/Copia		Acol_CR1_Ele30#LINE/CR1	Acol_Jockey_Ele7#LINE/Jockey
													Acol_hAT_Ele6#DNA/hAT		Acol_otherMITEs_Eles13#DNA	Acol_Pao_Bel_Ele67#LTR/Bel-Pao
													Acol_Pao_Bel_Ele27#LTR/Bel-Pao		Acol_Pao_Bel_Ele51#LTR/Bel-Pao	Acol_P_Ele9#DNA/P
													Acol_gypsy_Ele32#LTR/Gypsy		Acol_Pao_Bel_Ele67#LTR/Bel-Pao	Acol_CR1_Ele4#LINE/CR1
													Acol_gypsy_Ele74#LTR/Gypsy		Acol_hAT_Ele13#DNA/hAT	Acol_gypsy_Ele42#LTR/Gypsy
													Acol_Pao_Bel_Ele13#LTR/Bel-Pao		Acol_otherMITEs_Eles16#DNA	Acol_CR1_Ele17#LINE/CR1
													Acol_otherMITEs_Eles23#DNA		Acol_Pao_Bel_Ele11#LTR/Bel-Pao	Acol_R1_Ele17#LINE/R1
													Acol_RTE_Ele1#LINE/RTE		Acol_otherMITEs_Eles24#DNA	Acol_R1_Ele16#LINE/R1
													Acol_gypsy_Ele6#LTR/Gypsy		Acol_piggyBac_Ele6#DNA/PiggyBac	Acol_CR1_Ele22#LINE/CR1
													Acol_Tc1-mar_Ele9#DNA/Tc1-Mariner		Acol_gypsy_Ele55#LTR/Gypsy	Acol_Pao_Bel_Ele45#LTR/Bel-Pao
													Acol_R1_Ele9#LINE/R1		Acol_gypsy_Ele12#LTR/Gypsy	Acol_hAT_Ele2#DNA/hAT
													Acol_piggyBac_Ele5#DNA/PiggyBac		Acol_gypsy_Ele84#LTR/Gypsy	Acol_hAT_Ele7#DNA/hAT
													Acol_Outcast_Ele8#LINE/Outcast		Acol_Pao_Bel_Ele28#LTR/Bel-Pao	Acol_Tc1_Ele5#DNA/Tc1-Mariner
													Acol_P_Ele4#DNA/P		Acol_CR1_Ele6#LINE/CR1	Acol_gypsy_Ele6#LTR/Gypsy
													Acol_m3bp_Ele3#DNA/m3bp		Acol_I_Ele7#LINE/I	Acol_gypsy_Ele32#LTR/Gypsy
													Acol_CR1_Ele22#LINE/CR1		Acol_R1_Ele3#LINE/R1	Acol_m3bp_Ele3#DNA/m3bp
													Acol_CR1_Ele3#LINE/CR1		Acol_R1_Ele7#LINE/R1	Acol_gambol_Ele1#DNA/Gambol
													Acol_R1_Ele15#LINE/R1		Acol_R1_Ele5#LINE/R1	Acol_Tc1-mar_Ele5#DNA/Tc1-Mariner
													Acol_otherMITEs_Eles30#LINE		Acol_Pao_Bel_Ele38#LTR/Bel-Pao	Acol_piggyBac_Ele5#DNA/PiggyBac
													Acol_Tc1-mar_Ele1#DNA/Tc1-Mariner		Acol_m8bp_Ele5#DNA/m8bp	Acol_CR1_Ele30#LINE/CR1
													Acol_gambol_Ele14#DNA/Gambol		Acol_CR1_Ele19#LINE/CR1	Acol_CR1_Ele10#LINE/CR1
													Acol_L1_Ele5#LINE/L1		Acol_I_Ele2#LINE/I	Acol_copia_Ele20#LTR/Copia
													Acol_Tc1-mar_Ele4#DNA/Tc1-Mariner		Acol_Tc1-mar_Ele9#DNA/Tc1-Mariner	Acol_gypsy_Ele93#LTR/Gypsy
													Acol_Tc1-mar_Ele11#DNA/Tc1-Mariner		Acol_gypsy_Ele83#LTR/Gypsy	Acol_CR1_Ele15#LINE/CR1
													Acol_Jockey_Ele12#LINE/Jockey		Acol_Tc1_Ele5#DNA/Tc1-Mariner	Acol_gypsy_Ele17#LTR/Gypsy
													Acol_Outcast_Ele7#LINE/Outcast		Acol_Pao_Bel_Ele60#LTR/Bel-Pao	Acol_gypsy_Ele60#LTR/Gypsy
													Acol_CR1_Ele27#LINE/CR1		Acol_m3bp_Ele23#DNA/m3bp	Acol_mTA_Ele27#DNA/mTA
													Acol_CR1_Ele1#LINE/CR1		Acol_copia_Ele20#LTR/Copia	Acol_I_Ele1#LINE/I
													Acol_gypsy_Ele46#LTR/Gypsy		Acol_copia_Ele2#LTR/Copia	Acol_gypsy_Ele84#LTR/Gypsy
													Acol_Pao_Bel_Ele30#LTR/Bel-Pao		Acol_otherMITEs_Eles4#DNA	Acol_Pao_Bel_Ele75#LTR/Bel-Pao
													Acol_Pao_Bel_Ele38#LTR/Bel-Pao		Acol_gypsy_Ele50#LTR/Gypsy	Acol_gypsy_Ele38#LTR/Gypsy
													Acol_Pao_Bel_Ele52#LTR/Bel-Pao		Acol_gypsy_Ele60#LTR/Gypsy	Acol_Pao_Bel_Ele62#LTR/Bel-Pao
													Acol_gypsy_Ele17#LTR/Gypsy		Acol_Pao_Bel_Ele21#LTR/Bel-Pao	Acol_Pao_Bel_Ele32#LTR/Bel-Pao
													Acol_gypsy_Ele77#LTR/Gypsy		Acol_Jockey_Ele18#LINE/Jockey	Acol_Pao_Bel_Ele65#LTR/Bel-Pao
													Acol_gypsy_Ele24#LTR/Gypsy		Acol_gypsy_Ele66#LTR/Gypsy	Acol_gypsy_Ele83#LTR/Gypsy
															Acol_gypsy_Ele21#LTR/Gypsy	Acol_copia_Ele10#LTR/Copia
															Acol_R1_Ele19#LINE/R1	Acol_gypsy_Ele48#LTR/Gypsy
															Acol_CACTA_Ele5#DNA/CACTA	Acol_LTR_Ele6#LTR
															Acol_gypsy_Ele29#LTR/Gypsy
															Acol_Pao_Bel_Ele42#LTR/Bel-Pao
															Acol_gypsy_Ele88#LTR/Gypsy
															Acol_Pao_Bel_Ele73#LTR/Bel-Pao
															Acol_Pao_Bel_Ele72#LTR/Bel-Pao
															Acol_Pao_Bel_Ele18#LTR/Bel-Pao
															Acol_gypsy_Ele80#LTR/Gypsy
															Acol_gypsy_Ele35#LTR/Gypsy
															Acol_copia_Ele19#LTR/Copia
															Acol_copia_Ele24#LTR/Copia
															Acol_copia_Ele4#LTR/Copia
