# Supplementary material for: Transposable element variants and their potential adaptive impact in urban populations of the malaria vector Anopheles coluzzii
Source: HighWire-hosted journal article supplement (doi:10.1101/gr.275761.121), 2021-12-29
Supplement: Supplemental_Table_S3.xlsx [file Supplemental_Table_S3.xlsx]

## Sheet: S3. TE families in An. coluzzii
Table S3. TE families annotated in An. coluzzii. A) "Known" describes whether the family had previously been described in another species (Yes) or first described in the present study (New)."Classification" describes whether families are degenerate (DG), putatively autonomous (PA), putatively autonomous but lacking TIRs or LTRs ( PA*) or putatively non autonomous (PNA)." BBH in TEfam" refers to t…
A)														C)
ID	Known	Found by REPET	Classification	Class	Order	Superfamily	BBH in TEfam	BBH in AnnoTExcel	BBH in Repbase	TIR or LTR	TIR or LTR length	Domains			Bases
Acol_CACTA_Ele1	New	Yes	DG	Class I	DNA	CACTA	-	-	-	TIR	24	DUF4806 superfamily		Order	DLA112	DLA155B	DLA146	LBV88	LBV136	LBV11	AcolN1
Acol_CACTA_Ele2	New	Yes	DG	Class I	DNA	CACTA	-	-	-	Missing	0			DNA	11789974	10721814	11329347	11747023	10918841	12380509	11984535
Acol_CACTA_Ele3	New	Yes	DG	Class I	DNA	CACTA	-	-	-	Missing	0			LINE	7521206	6612223	7133770	7168627	6514191	7214249	6478330
Acol_CACTA_Ele4	New	Yes	DG	Class I	DNA	CACTA	-	-	-	Missing	0			LTR	7753250	6728803	7203204	7687034	6661519	7393810	5846430
Acol_CACTA_Ele5	New	Yes	DG	Class I	DNA	CACTA	-	-	-	Missing	0			SINE	1224953	1161155	1210710	1203103	1140651	1251168	1263968
Acol_CACTA_Ele6	New	Yes	DG	Class I	DNA	CACTA	-	-	-	Missing	0
Acol_CACTA_Ele7	Yes	Yes	DG	Class I	DNA	CACTA	Agam_Tc1_Ele14#DNA/Tc1	-	-	TIR	10				Counts
Acol_CACTA_Ele8	Yes	Yes	DG	Class I	DNA	CACTA	Agam_Tc1_Ele8#DNA/Tc1	-	-	Missing	0			Order	DLA112	DLA155B	DLA146	LBV88	LBV136	LBV11	AcolN1
Acol_copia_Ele10	Yes	Yes	PA	Class II	LTR	Copia	Agam_Ty1_copia_Ele10#LTR/Ty1_copia	-	-	LTR	182	RVT_2 superfamily, RNase_H_like superfamily, Retrotran_gag_2 superfamily, rve superfamily, gag_pre-integrs superfamily, Retrotran_gag_3 superfamily, ZnF_C2HC superfamily		DNA	28421	26248	27610	28345	26536	29396	28619
Acol_copia_Ele11	Yes	No	DG	Class II	LTR	Copia	Agam_Ty1_copia_Ele11#LTR/Ty1_copia	-	RETRO92_AG-I#LTR/Copia	LTR	224	Retrotran_gag_3 superfamily, rve superfamily, RNase_H_like superfamily		LINE	8505	7575	8048	7938	7574	8055	7673
Acol_copia_Ele12	Yes	Yes	PA	Class II	LTR	Copia	Agam_Ty1_copia_Ele12#LTR/Ty1_copia	-	Copia1-I_AG#LTR/Copia	LTR	153	RVT_2 superfamily, RNase_H_like superfamily, Retrotran_gag_2 superfamily, rve superfamily, gag_pre-integrs superfamily		LTR	6058	5180	5393	5863	5277	5698	5098
Acol_copia_Ele13	Yes	Yes	PA	Class II	LTR	Copia	Agam_Ty1_copia_Ele13#LTR/Ty1_copia	COPIA5_AG|Full|LTR|piler-ag-5-40-90-90_Clu-150	Copia5-I_AG#LTR/Copia	LTR	108	Retrotran_gag_2 superfamily, rve superfamily, gag_pre-integrs superfamily, Retrotran_gag_3 superfamily, RVT_2 superfamily, RNase_H_like superfamily		SINE	6936	6561	6877	6810	6485	7031	7086
Acol_copia_Ele14	Yes	Yes	PA	Class II	LTR	Copia	Agam_Ty1_copia_Ele14#LTR/Ty1_copia	-	Copia-8_AG-I#LTR/Copia	LTR	116	RVT_2 superfamily, RNase_H_like superfamily, Retrotran_gag_2 superfamily, rve superfamily, gag_pre-integrs superfamily, Retrotran_gag_3 superfamily, zf-CCHC_2 superfamily
Acol_copia_Ele15	Yes	Yes	DG	Class II	LTR	Copia	Agam_Ty1_copia_Ele15#LTR/Ty1_copia	-	-	LTR	182	RNase_H_like superfamily, Retrotran_gag_2 superfamily, rve superfamily, gag_pre-integrs superfamily, ZnF_C2HC superfamily			Bases
Acol_copia_Ele16	Yes	No	PA	Class II	LTR	Copia	Agam_Ty1_copia_Ele16#LTR/Ty1_copia	-	-	LTR	212	rve superfamily, gag_pre-integrs superfamily, RVT_2 superfamily, RNase_H_like superfamily		Superfamily	DLA112	DLA155B	DLA146	LBV88	LBV136	LBV11	AcolN1
Acol_copia_Ele17	Yes	No	PA	Class II	LTR	Copia	Agam_Ty1_copia_Ele17#LTR/Ty1_copia	-	-	LTR	185	RVT_2 superfamily, RNase_H_like superfamily, Retrotran_gag_2 superfamily, rve superfamily, gag_pre-integrs superfamily, ZnF_C2HC superfamily, Retrotran_gag_3 superfamily, zf-CCHC superfamily		Bel-Pao	3024690	2521285	2773925	2944770	2677868	2983186	2420902
Acol_copia_Ele19	Yes	Yes	PA	Class II	LTR	Copia	Agam_Ty1_copia_Ele19#LTR/Ty1_copia	-	-	LTR	154	RVT_2 superfamily, RNase_H_like superfamily, Retrotran_gag_2 superfamily, rve superfamily, gag_pre-integrs superfamily, ZnF_C2HC superfamily, zf-CCHC superfamily		CACTA	233709	159258	171324	175128	179739	189816	190657
Acol_copia_Ele2	Yes	Yes	DG	Class II	LTR	Copia	Agam_Ty1_copia_Ele2#LTR/Ty1_copia	-	Copia4-I_AG#LTR/Copia	LTR	199	RVT_2 superfamily, RNase_H_like superfamily, rve superfamily, gag_pre-integrs superfamily, zf-CCHC superfamily		Copia	724581	623028	638377	696692	590631	660305	526753
Acol_copia_Ele20	Yes	Yes	PA	Class II	LTR	Copia	Agam_Ty1_copia_Ele20#LTR/Ty1_copia	-	-	LTR	110	RVT_2 superfamily, RNase_H_like superfamily, Retrotran_gag_2 superfamily, rve superfamily, gag_pre-integrs superfamily, Retrotran_gag_3 superfamily, ZnF_C2HC superfamily, zf-CCHC superfamily		CR1	2911893	2569468	2855319	2810160	2537033	2933179	2408413
Acol_copia_Ele21	Yes	Yes	PA	Class II	LTR	Copia	Aara_Ty1_Copia_Ele2#LTR/Ty1_copia	-	-	LTR	111	RVT_2 superfamily, RNase_H_like superfamily, Retrotran_gag_2 superfamily, rve superfamily, gag_pre-integrs superfamily, Retrotran_gag_3 superfamily		Gambol	307383	268145	276425	307543	304493	376645	330952
Acol_copia_Ele22	Yes	No	PA	Class II	LTR	Copia	Amer_Ty1_Copia_Ele1#LTR/Ty1_copia	-	Copia2-I_AG#LTR/Copia	LTR	193	RVT_2 superfamily, RNase_H_like superfamily, Retrotran_gag_2 superfamily, rve superfamily, gag_pre-integrs superfamily, ZnF_C2HC superfamily, zf-CCHC superfamily		Gypsy	3796629	3401900	3593014	3864684	3189130	3558294	2682886
Acol_copia_Ele23	Yes	No	DG	Class II	LTR	Copia	-	COPIA3_AG|Full|LTR|piler-ag-5-40-90-90_Clu-172	Copia3-I_AG#LTR/Copia	LTR	110	Retrotran_gag_2 superfamily, Retrotran_gag_3 superfamily		hAT	650695	550546	616736	623332	550822	650231	653897
Acol_copia_Ele24	Yes	Yes	DG	Class II	LTR	Copia	-	Novel|Novel|LTR|piler-ag-5-40-90-90_Clu-149	Copia-7_AG-I#LTR/Copia	LTR	169	Retrotran_gag_2 superfamily, Retrotran_gag_3 superfamily, ZnF_C2HC superfamily, zf-CCHC superfamily		Helitron	35117	40587	45091	43928	36357	50341	49758
Acol_copia_Ele25	New	Yes	PA	Class II	LTR	Copia	-	-	-	LTR	236	RVT_2 superfamily, RNase_H_like superfamily, Retrotran_gag_2 superfamily, rve superfamily, gag_pre-integrs superfamily, rve_3 superfamily, Retrotran_gag_3 superfamily		I	290607	303348	282056	282070	268379	309666	388937
Acol_copia_Ele26	New	Yes	PA	Class II	LTR	Copia	-	-	-	LTR	234	RVT_2 superfamily, RNase_H_like superfamily, rve superfamily, gag_pre-integrs superfamily, Retrotran_gag_2 superfamily, rve_3 superfamily, ZnF_C2HC superfamily		Jockey	1052910	884552	925665	976329	890140	961599	895646
Acol_copia_Ele27	Yes	No	DG	Class II	LTR	Copia	-	-	MTANGA_I#LTR/Copia	LTR	117	Retrotran_gag_2 superfamily, zf-CCHC superfamily, ZnF_C2HC superfamily, RVT_2 superfamily, rve superfamily		L1	160964	148654	152153	140666	129092	174173	154237
Acol_copia_Ele28	New	Yes	PA	Class II	LTR	Copia	-	-	-	LTR	201	RVT_2 superfamily, rve superfamily, gag_pre-integrs superfamily, RNase_H_like superfamily		L2	243409	219480	201431	242763	248269	221644	209551
Acol_copia_Ele4	Yes	Yes	PA	Class II	LTR	Copia	Agam_Ty1_copia_Ele4#LTR/Ty1_copia	-	-	LTR	164	RVT_2 superfamily, RNase_H_like superfamily, Retrotran_gag_2 superfamily, rve superfamily, gag_pre-integrs superfamily, rve_3 superfamily, Retrotran_gag_3 superfamily, ZnF_C2HC superfamily, zf-CCHC superfamily, Tra5 superfamily		Loner	179196	186446	169530	151028	128256	148022	146679
Acol_copia_Ele5	Yes	Yes	PA	Class II	LTR	Copia	Agam_Ty1_copia_Ele5#LTR/Ty1_copia	-	-	LTR	213	RVT_2 superfamily, RNase_H_like superfamily, Retrotran_gag_2 superfamily, rve superfamily, gag_pre-integrs superfamily, rve_3 superfamily		m3bp	1231845	1152345	1233979	1272104	1166399	1366823	1335153
Acol_copia_Ele6	Yes	Yes	PA	Class II	LTR	Copia	Agam_Ty1_copia_Ele6#LTR/Ty1_copia	Novel|Novel|LTR|piler-ag-5-40-90-90_Clu-134	Copia-6_AG-I#LTR/Copia	LTR	145	RVT_2 superfamily, RNase_H_like superfamily, Retrotran_gag_2 superfamily, rve superfamily, gag_pre-integrs superfamily, PHA02517 superfamily		m4bp	128573	120829	127369	132588	125972	155339	151328
Acol_copia_Ele7	Yes	Yes	PA	Class II	LTR	Copia	Agam_Ty1_copia_Ele7#LTR/Ty1_copia	-	-	LTR	166	RVT_2 superfamily, RNase_H_like superfamily, Retrotran_gag_2 superfamily, rve superfamily, gag_pre-integrs superfamily		m8bp	889274	851456	873366	897483	864951	894331	932230
Acol_copia_Ele8	Yes	Yes	PA	Class II	LTR	Copia	Agam_Ty1_copia_Ele8#LTR/Ty1_copia	-	-	LTR	239	RVT_2 superfamily, RNase_H_like superfamily, Retrotran_gag_2 superfamily, rve superfamily, gag_pre-integrs superfamily, Retrotran_gag_3 superfamily		Maque	2878	3561	2659	3108	3679	3309	3627
Acol_copia_Ele9	Yes	No	DG	Class II	LTR	Copia	Agam_Ty1_copia_Ele9#LTR/Ty1_copia	-	-	LTR	144	Retrotran_gag_3 superfamily, RVT_2 superfamily, RNase_H_like superfamily, rve superfamily, gag_pre-integrs superfamily		mTA	3022671	2904768	2992993	3092048	2868192	3252939	3169664
Acol_CR1_Ele1	Yes	Yes	DG	Class II	LINE	CR1	Agam_CR1_Ele1#LINE/CR1	-	-	NA	-	PHD_SF superfamily, EEP superfamily		Outcast	382543	284985	271525	312134	275741	363277	204952
Acol_CR1_Ele10	Yes	Yes	DG	Class II	LINE	CR1	Agam_CR1_Ele10#LINE/CR1	-	-	NA	-	RT_like superfamily, RVT_1 superfamily		P	618958	573637	601980	676009	562442	723298	719847
Acol_CR1_Ele11	Yes	No	DG	Class II	LINE	CR1	Agam_CR1_Ele11#LINE/CR1	-	-	NA	-	RT_like superfamily, RVT_1 superfamily		PIF-Harbinger	651716	554014	577644	616030	601243	628265	606629
Acol_CR1_Ele12	Yes	Yes	PA	Class II	LINE	CR1	Agam_CR1_Ele12#LINE/CR1	-	CR1-7_AG#LINE/CR1	NA	-	RT_like superfamily, RVT_1 superfamily, EEP superfamily, PHD_SF superfamily		PiggyBac	210962	180112	212026	189770	171746	198144	189566
Acol_CR1_Ele13	Yes	Yes	PA	Class II	LINE	CR1	Agam_CR1_Ele13#LINE/CR1	CR1-13_AG|Full|NLTR|piler-ag-5-40-90-90_Clu-16	CR1-12_AG#LINE/CR1	NA	-	RT_like superfamily, RVT_1 superfamily, EEP superfamily, PHD_SF superfamily		R1	364112	350827	396218	398307	315808	355955	339613
Acol_CR1_Ele14	Yes	No	PA	Class II	LINE	CR1	Agam_CR1_Ele14#LINE/CR1	-	-	NA	-	RT_like superfamily, RVT_1 superfamily, EEP superfamily, PHD_SF superfamily		RTE	1930452	1661447	1873893	1850093	1719365	1744560	1725282
Acol_CR1_Ele15	Yes	Yes	PA	Class II	LINE	CR1	Agam_CR1_Ele15#LINE/CR1	-	-	NA	-	RT_like superfamily, RVT_1 superfamily, EEP superfamily, PHD_SF superfamily		Tc1-Mariner	1711437	1461086	1593305	1598085	1519462	1734798	1652322
Acol_CR1_Ele16	Yes	No	DG	Class II	LINE	CR1	Agam_CR1_Ele16#LINE/CR1	-	-	NA	-			Transib	54084	43723	49890	53697	52681	56225	57785
Acol_CR1_Ele17	Yes	Yes	PA	Class II	LINE	CR1	Agam_CR1_Ele17#LINE/CR1	CR1-ELE17|Fragment|NLTR|piler-ag-5-40-90-90_Clu-147	CR1-9_AG#LINE/CR1	NA	-	PHD_SF superfamily, RT_like superfamily, RVT_1 superfamily, EEP superfamily		tSINE	1224953	1161155	1210710	1203103	1140651	1251168	1263968
Acol_CR1_Ele18	Yes	No	PA	Class II	LINE	CR1	Agam_CR1_Ele18#LINE/CR1	CR1-ELE18|Fragment|NLTR|piler-ag-5-40-90-90_Clu-116	-	NA	-	RT_like superfamily, RVT_1 superfamily, EEP superfamily
Acol_CR1_Ele19	Yes	Yes	PA	Class II	LINE	CR1	Agam_CR1_Ele19#LINE/CR1	-	CR1-5_AG#LINE/CR1	NA	-	EEP superfamily, PHD_SF superfamily, RT_like superfamily, RVT_1 superfamily			Counts
Acol_CR1_Ele2	Yes	Yes	DG	Class II	LINE	CR1	Agam_CR1_Ele2#LINE/CR1	-	-	NA	-	RT_like superfamily, RVT_1 superfamily, PHD_SF superfamily		Superfamily	DLA112	DLA155B	DLA146	LBV88	LBV136	LBV11	AcolN1
Acol_CR1_Ele20	Yes	Yes	PA	Class II	LINE	CR1	Agam_CR1_Ele20#LINE/CR1	CR1-6_AG|Full|NLTR|piler-ag-5-40-90-90_Clu-72	CR1-6_AG#LINE/CR1	NA	-	PHD_SF superfamily, RT_like superfamily, RVT_1 superfamily, EEP superfamily		Bel-Pao	2542	2092	2260	2469	2278	2400	2231
Acol_CR1_Ele21	Yes	Yes	PA	Class II	LINE	CR1	Agam_CR1_Ele21#LINE/CR1	-	CR1-8_AG#LINE/CR1	NA	-	PHD_SF superfamily, RT_like superfamily, RVT_1 superfamily, EEP superfamily		CACTA	277	184	229	209	190	263	239
Acol_CR1_Ele22	Yes	Yes	PA	Class II	LINE	CR1	Agam_CR1_Ele22#LINE/CR1	-	Ag-CR1-22#LINE/CR1	NA	-	PHD_SF superfamily, RT_like superfamily, RVT_1 superfamily, EEP superfamily		Copia	482	411	421	455	434	441	412
Acol_CR1_Ele23	Yes	Yes	DG	Class II	LINE	CR1	Agam_CR1_Ele23#LINE/CR1	-	CR1-3_AG#LINE/CR1	NA	-	PHD_SF superfamily, RT_like superfamily, RVT_1 superfamily		CR1	3012	2625	2811	2789	2690	2882	2551
Acol_CR1_Ele24	Yes	No	PA	Class II	LINE	CR1	Agam_CR1_Ele24#LINE/CR1	-	-	NA	-	RT_like superfamily, RVT_1 superfamily, EEP superfamily, PHD_SF superfamily		Gambol	656	604	604	657	618	724	656
Acol_CR1_Ele25	Yes	Yes	PA	Class II	LINE	CR1	Agam_CR1_Ele25#LINE/CR1	-	-	NA	-	PHD_SF superfamily, RT_like superfamily, RVT_1 superfamily, EEP superfamily		Gypsy	2622	2310	2324	2551	2179	2458	2044
Acol_CR1_Ele26	Yes	Yes	DG	Class II	LINE	CR1	Agam_CR1_Ele26#LINE/CR1	-	CR1-4B_AG#LINE/CR1	NA	-	PHD_SF superfamily, RT_like superfamily, RVT_1 superfamily		hAT	1608	1416	1530	1557	1438	1587	1582
Acol_CR1_Ele27	Yes	Yes	PA	Class II	LINE	CR1	Agam_CR1_Ele27#LINE/CR1	CR1-4_AG|Fragment|NLTR|piler-ag-5-40-90-90_Clu-76	CR1-4_AG#LINE/CR1	NA	-	RT_like superfamily, RVT_1 superfamily, EEP superfamily		Helitron	124	122	133	133	126	154	143
Acol_CR1_Ele28	Yes	Yes	DG	Class II	LINE	CR1	Agam_CR1_Ele28#LINE/CR1	CR1-ELE28|Fragment|NLTR|piler-ag-5-40-90-90_Clu-82	CR1-11_AG#LINE/CR1	NA	-	RT_like superfamily, RVT_1 superfamily, PHD_SF superfamily		I	340	324	310	309	289	328	334
Acol_CR1_Ele29	Yes	No	DG	Class II	LINE	CR1	Agam_CR1_Ele29#LINE/CR1	-	-	NA	-			Jockey	1222	1096	1149	1112	1098	1187	1135
Acol_CR1_Ele3	Yes	Yes	PA	Class II	LINE	CR1	Agam_CR1_Ele3#LINE/CR1	CR1-2_AG|Fragment|NLTR|piler-ag-5-40-90-90_Clu-22	CR1-2_AG#LINE/CR1	NA	-	RT_like superfamily, RVT_1 superfamily, EEP superfamily		L1	210	163	182	163	160	187	180
Acol_CR1_Ele30	Yes	Yes	DG	Class II	LINE	CR1	Agam_Q#LINE/CR1	Q_AG|Fragment|NLTR|piler-ag-5-40-90-90_Clu-24	Q#LINE/CR1	NA	-	PHD_SF superfamily, RT_like superfamily, RVT_1 superfamily		L2	330	298	299	303	294	292	298
Acol_CR1_Ele31	Yes	Yes	DG	Class II	LINE	CR1	Agam_T1#LINE/CR1	T1_AG|Full|NLTR|piler-ag-5-40-90-90_Clu-18	T1#LINE/CR1	NA	-	PHD_SF superfamily, EEP superfamily		Loner	155	138	146	135	124	144	125
Acol_CR1_Ele4	Yes	Yes	PA	Class II	LINE	CR1	Agam_CR1_Ele4#LINE/CR1	-	-	NA	-	EEP superfamily, PHD_SF superfamily, RT_like superfamily, RVT_1 superfamily		m3bp	3949	3650	3919	4021	3726	4328	4166
Acol_CR1_Ele5	Yes	Yes	DG	Class II	LINE	CR1	Agam_CR1_Ele5#LINE/CR1	-	-	NA	-	PHD_SF superfamily, EEP superfamily		m4bp	364	348	369	377	347	435	427
Acol_CR1_Ele6	Yes	Yes	PA	Class II	LINE	CR1	Agam_CR1_Ele6#LINE/CR1	-	-	NA	-	RT_like superfamily, RVT_1 superfamily, EEP superfamily, PHD_SF superfamily		m8bp	2122	2021	2131	2203	2054	2206	2284
Acol_CR1_Ele7	Yes	Yes	DG	Class II	LINE	CR1	Agam_CR1_Ele7#LINE/CR1	CR1_ELE7|Full|NLTR|piler-ag-5-40-90-90_Clu-36	Ag-CR1-7#LINE/CR1	NA	-			Maque	51	64	48	55	65	59	64
Acol_CR1_Ele8	Yes	Yes	DG	Class II	LINE	CR1	Agam_CR1_Ele8#LINE/CR1	-	CR1-10_AG#LINE/CR1	NA	-	RT_like superfamily, RVT_1 superfamily, PHD_SF superfamily		mTA	9796	9371	9695	9948	9352	10205	9997
Acol_CR1_Ele9	Yes	Yes	DG	Class II	LINE	CR1	Agam_CR1_Ele9#LINE/CR1	-	-	NA	-	PHD_SF superfamily		Outcast	324	308	282	281	287	314	327
Acol_gambol_Ele1	Yes	Yes	PA	Class I	DNA	Gambol	Agam_gambol_Ele1#DNA/gambol	-	-	TIR	337	rve superfamily, COG3415 superfamily, HTH superfamily		P	989	913	931	1004	902	1005	1031
Acol_gambol_Ele10	Yes	Yes	PA	Class I	DNA	Gambol	Agam_gambol_Ele10#DNA/gambol	GAMBOL_ELE10|Fragment|TIR|piler-ag-5-40-90-90_Clu-57	Mariner-N20_AG#DNA/TcMar-ISRm11	TIR	2091	rve superfamily, COG3415 superfamily, HTH superfamily, rve superfamily, COG3415 superfamily, HTH superfamily		PIF-Harbinger	1617	1468	1517	1606	1545	1659	1664
Acol_gambol_Ele11	Yes	No	PA	Class I	DNA	Gambol	Agam_gambol_Ele11#DNA/gambol	-	-	TIR	380	rve superfamily, HTH superfamily, HTH superfamily, COG3415 superfamily		PiggyBac	495	449	482	478	429	458	443
Acol_gambol_Ele12	Yes	Yes	PA	Class I	DNA	Gambol	Agam_gambol_Ele12#DNA/gambol	GAMBOL_ELE12|Fragment|TIR|piler-ag-5-40-90-90_Clu-235	-	TIR	174	rve superfamily		R1	276	260	290	273	245	290	280
Acol_gambol_Ele13	Yes	No	PA*	Class I	DNA	Gambol	Agam_gambol_Ele13#DNA/gambol	-	-	Missing	0	rve superfamily, HTH superfamily, HTH superfamily, COG3415 superfamily		RTE	2628	2357	2570	2566	2382	2426	2437
Acol_gambol_Ele14	New	Yes	PA	Class I	DNA	Gambol	-	-	-	TIR	794	rve superfamily, COG3415 superfamily, HTH superfamily		Tc1-Mariner	2811	2466	2611	2640	2531	2751	2667
Acol_gambol_Ele15	Yes	Yes	PNA	Class I	DNA	Gambol	-	GAMBOL_ELE6|MITE-like|TIR|piler-ag-5-40-90-90_Clu-49	-	TIR	133			Transib	85	70	84	83	85	82	80
Acol_gambol_Ele16	New	Yes	PNA	Class I	DNA	Gambol	-	-	-	TIR	298			tSINE	6936	6561	6877	6810	6485	7031	7086
Acol_gambol_Ele2	Yes	Yes	PNA	Class I	DNA	Gambol	Agam_gambol_Ele2#DNA/gambol	GAMBOL_ELE2|MITE-like|TIR|piler-ag-5-40-90-90_Clu-189	-	TIR	337
Acol_gambol_Ele3	Yes	Yes	PA	Class I	DNA	Gambol	Agam_gambol_Ele3#DNA/gambol	-	-	TIR	222	rve superfamily, HTH superfamily, COG3415 superfamily, HTH superfamily
Acol_gambol_Ele4	Yes	Yes	PA	Class I	DNA	Gambol	Agam_gambol_Ele4#DNA/gambol	-	-	TIR	14	rve superfamily, HTH superfamily, COG3415 superfamily
Acol_gambol_Ele5	Yes	Yes	PA	Class I	DNA	Gambol	Agam_gambol_Ele5#DNA/gambol	-	Mariner-3_AG#DNA/TcMar-ISRm11	TIR	346	rve superfamily, HTH superfamily, COG3415 superfamily, HTH superfamily
Acol_gambol_Ele6	Yes	Yes	PA	Class I	DNA	Gambol	Agam_gambol_Ele6#DNA/gambol	-	-	TIR	1096	rve superfamily, COG3415 superfamily, HTH superfamily, COG3415 superfamily, HTH superfamily
Acol_gambol_Ele7	Yes	Yes	PA	Class I	DNA	Gambol	Agam_gambol_Ele7#DNA/gambol	-	-	TIR	136	rve superfamily, COG3415 superfamily, HTH superfamily
Acol_gypsy_Ele10	Yes	Yes	DG	Class II	LTR	Gypsy	Agam_Ty3_gypsy_Ele10#LTR/Ty3_gypsy	GYPSY17_AG|Solo-LTR|LTR|piler-ag-5-40-90-90_Clu-125	Gypsy17-I_AG#LTR/Gypsy	LTR	869	RT_like superfamily, RNase_H_like superfamily, RT_RNaseH_2 superfamily, RT_RNaseH superfamily, RVT_1 superfamily, Integrase_H2C2 superfamily, rve superfamily
Acol_gypsy_Ele11	Yes	Yes	DG	Class II	LTR	Gypsy	Agam_Ty3_gypsy_Ele11#LTR/Ty3_gypsy	-	Gypsy54-I_AG#LTR/Gypsy	LTR	311	RT_like superfamily, RNase_H_like superfamily, RT_RNaseH_2 superfamily, RT_RNaseH superfamily, RVT_1 superfamily, rve superfamily, Integrase_H2C2 superfamily, pepsin_retropepsin_like superfamily
Acol_gypsy_Ele12	Yes	Yes	PA	Class II	LTR	Gypsy	Agam_Ty3_gypsy_Ele12#LTR/Ty3_gypsy	GYPSY29_AG|Full|LTR|piler-ag-5-40-90-90_Clu-138	Gypsy29-I_AG#LTR/Gypsy	LTR	161	RT_like superfamily, RNase_H_like superfamily, RT_RNaseH_2 superfamily, RVT_1 superfamily, RT_RNaseH superfamily, rve superfamily, Integrase_H2C2 superfamily, pepsin_retropepsin_like superfamily
Acol_gypsy_Ele13	Yes	Yes	DG	Class II	LTR	Gypsy	Agam_Ty3_gypsy_Ele13#LTR/Ty3_gypsy	-	Gypsy5-I_AG#LTR/Gypsy	LTR	227	RNase_H_like superfamily, RT_RNaseH_2 superfamily, RT_RNaseH superfamily, Integrase_H2C2 superfamily, pepsin_retropepsin_like superfamily
Acol_gypsy_Ele14	Yes	Yes	DG	Class II	LTR	Gypsy	Agam_Ty3_gypsy_Ele14#LTR/Ty3_gypsy	-	Gypsy6-I_AG#LTR/Gypsy	LTR	181	Integrase_H2C2 superfamily, RT_like superfamily, RVT_1 superfamily, RT_RNaseH_2 superfamily, RT_RNaseH superfamily, pepsin_retropepsin_like superfamily
Acol_gypsy_Ele15	Yes	Yes	PA	Class II	LTR	Gypsy	Agam_Ty3_gypsy_Ele15#LTR/Ty3_gypsy	GYPSY32_AG|Full|LTR|piler-ag-5-40-90-90_Clu-104	Gypsy32-I_AG#LTR/Gypsy	LTR	260	RT_like superfamily, RNase_H_like superfamily, RT_RNaseH_2 superfamily, RT_RNaseH superfamily, RVT_1 superfamily, rve superfamily, Integrase_H2C2 superfamily
Acol_gypsy_Ele16	Yes	Yes	PA	Class II	LTR	Gypsy	Agam_Ty3_gypsy_Ele16#LTR/Ty3_gypsy	-	Gypsy33-I_AG#LTR/Gypsy	LTR	222	RT_like superfamily, RNase_H_like superfamily, RT_RNaseH_2 superfamily, RT_RNaseH superfamily, RVT_1 superfamily, rve superfamily, Integrase_H2C2 superfamily, pepsin_retropepsin_like superfamily
Acol_gypsy_Ele17	Yes	Yes	PA	Class II	LTR	Gypsy	Agam_Ty3_gypsy_Ele17#LTR/Ty3_gypsy	-	Gypsy4-I_AG#LTR/Gypsy	LTR	271	RT_like superfamily, RNase_H_like superfamily, RT_RNaseH_2 superfamily, RT_RNaseH superfamily, RVT_1 superfamily, rve superfamily, Integrase_H2C2 superfamily, pepsin_retropepsin_like superfamily, zf-H2C2 superfamily
Acol_gypsy_Ele18	Yes	Yes	PA	Class II	LTR	Gypsy	Agam_Ty3_gypsy_Ele18#LTR/Ty3_gypsy	GYPSY35_AG|Full|LTR|piler-ag-5-40-90-90_Clu-171	Gypsy35-I_AG#LTR/Gypsy	LTR	233	RT_like superfamily, RNase_H_like superfamily, RVT_1 superfamily, RT_RNaseH_2 superfamily, RT_RNaseH superfamily, rve superfamily, pepsin_retropepsin_like superfamily, Integrase_H2C2 superfamily
Acol_gypsy_Ele19	Yes	Yes	PA	Class II	LTR	Gypsy	Agam_Ty3_gypsy_Ele19#LTR/Ty3_gypsy	-	Gypsy36-I_AG#LTR/Gypsy	LTR	294	RT_like superfamily, RNase_H_like superfamily, RVT_1 superfamily, RT_RNaseH_2 superfamily, RT_RNaseH superfamily, rve superfamily, Integrase_H2C2 superfamily, pepsin_retropepsin_like superfamily, zf-CCHC superfamily, ZnF_C2HC superfamily, zf-H2C2 superfamily
Acol_gypsy_Ele20	Yes	Yes	PA	Class II	LTR	Gypsy	Agam_Ty3_gypsy_Ele20#LTR/Ty3_gypsy	-	Gypsy37-I_AG#LTR/Gypsy	LTR	176	RT_like superfamily, RNase_H_like superfamily, RT_RNaseH superfamily, RT_RNaseH_2 superfamily, RVT_1 superfamily, pepsin_retropepsin_like superfamily, zf-CCHC superfamily, ZnF_C2HC superfamily, rve superfamily
Acol_gypsy_Ele21	Yes	Yes	PA	Class II	LTR	Gypsy	Agam_Ty3_gypsy_Ele21#LTR/Ty3_gypsy	-	Gypsy38-I_AG#LTR/Gypsy	LTR	194	RT_like superfamily, RNase_H_like superfamily, RT_RNaseH_2 superfamily, RT_RNaseH superfamily, RVT_1 superfamily, rve superfamily, pepsin_retropepsin_like superfamily, Integrase_H2C2 superfamily
Acol_gypsy_Ele22	Yes	No	PA	Class II	LTR	Gypsy	Agam_Ty3_gypsy_Ele22#LTR/Ty3_gypsy	-	Invader1-I_AG#LTR/Gypsy	LTR	205	RT_like superfamily, RNase_H_like superfamily, RT_RNaseH_2 superfamily, RT_RNaseH superfamily, RVT_1 superfamily, rve superfamily, pepsin_retropepsin_like superfamily, Integrase_H2C2 superfamily, zf-H2C2 superfamily, zf-CCHC superfamily, ZnF_C2HC superfamily
Acol_gypsy_Ele23	Yes	Yes	PA	Class II	LTR	Gypsy	Agam_Ty3_gypsy_Ele23#LTR/Ty3_gypsy	-	Gypsy72-I_AG#LTR/Gypsy	LTR	205	RT_like superfamily, RVT_1 superfamily, pepsin_retropepsin_like superfamily, zf-CCHC superfamily, SAP superfamily, ZnF_C2HC superfamily, zf-CCHC_2 superfamily, RNase_H_like superfamily, RT_RNaseH_2 superfamily, RT_RNaseH superfamily, rve superfamily, Integrase_H2C2 superfamily, zf-H2C2 superfamily
Acol_gypsy_Ele24	Yes	Yes	DG	Class II	LTR	Gypsy	Agam_Ty3_gypsy_Ele24#LTR/Ty3_gypsy	-	Gypsy39-I_AG#LTR/Gypsy	LTR	351	RT_like superfamily, RNase_H_like superfamily, RT_RNaseH superfamily, RT_RNaseH_2 superfamily, RVT_1 superfamily, rve superfamily, Integrase_H2C2 superfamily, zf-H2C2 superfamily
Acol_gypsy_Ele25	Yes	Yes	DG	Class II	LTR	Gypsy	Agam_Ty3_gypsy_Ele25#LTR/Ty3_gypsy	-	Gypsy40-I_AG#LTR/Gypsy	LTR	167	RT_like superfamily, RNase_H_like superfamily, RT_RNaseH superfamily, RT_RNaseH_2 superfamily, RVT_1 superfamily, rve superfamily, Integrase_H2C2 superfamily, pepsin_retropepsin_like superfamily
Acol_gypsy_Ele26	Yes	Yes	DG	Class II	LTR	Gypsy	Agam_Ty3_gypsy_Ele26#LTR/Ty3_gypsy	-	Gypsy41-I_AG#LTR/Gypsy	LTR	311	RT_like superfamily, RNase_H_like superfamily, RT_RNaseH superfamily, RT_RNaseH_2 superfamily, RVT_1 superfamily, rve superfamily, Integrase_H2C2 superfamily, Gypsy superfamily
Acol_gypsy_Ele27	Yes	No	DG	Class II	LTR	Gypsy	Agam_Ty3_gypsy_Ele27#LTR/Ty3_gypsy	-	Gypsy42-I_AG#LTR/Gypsy	LTR	250	Integrase_H2C2 superfamily, rve superfamily, RT_like superfamily, RVT_1 superfamily
Acol_gypsy_Ele28	Yes	No	DG	Class II	LTR	Gypsy	Agam_Ty3_gypsy_Ele28#LTR/Ty3_gypsy	-	Gypsy43-I_AG#LTR/Gypsy	LTR	147	RT_like superfamily, RNase_H_like superfamily, RT_RNaseH superfamily, RT_RNaseH_2 superfamily, RVT_1 superfamily, Integrase_H2C2 superfamily, rve superfamily
Acol_gypsy_Ele29	Yes	Yes	DG	Class II	LTR	Gypsy	Agam_Ty3_gypsy_Ele29#LTR/Ty3_gypsy	-	Gypsy44-I_AG#LTR/Gypsy	LTR	169	RNase_H_like superfamily, RT_RNaseH superfamily, rve superfamily, Integrase_H2C2 superfamily, RT_like superfamily, RVT_1 superfamily
Acol_gypsy_Ele3	Yes	Yes	DG	Class II	LTR	Gypsy	Agam_Ty3_gypsy_Ele3#LTR/Ty3_gypsy	GYPSY8_AG|Solo-LTR|LTR|piler-ag-5-40-90-90_Clu-206	Gypsy8-I_AG#LTR/Gypsy	LTR	803	Integrase_H2C2 superfamily, rve superfamily, RT_like superfamily, RT_RNaseH_2 superfamily, RVT_1 superfamily, pepsin_retropepsin_like superfamily
Acol_gypsy_Ele30	Yes	No	DG	Class II	LTR	Gypsy	Agam_Ty3_gypsy_Ele30#LTR/Ty3_gypsy	-	Gypsy45-I_AG#LTR/Gypsy	LTR	212	RT_like superfamily, RNase_H_like superfamily, RT_RNaseH superfamily, RT_RNaseH_2 superfamily, RVT_1 superfamily, rve superfamily, Integrase_H2C2 superfamily
Acol_gypsy_Ele31	Yes	Yes	DG	Class II	LTR	Gypsy	Agam_Ty3_gypsy_Ele31#LTR/Ty3_gypsy	-	Gypsy7-I_AG#LTR/Gypsy	LTR	327	RT_like superfamily, RNase_H_like superfamily, RT_RNaseH superfamily, RT_RNaseH_2 superfamily, RVT_1 superfamily, rve superfamily, Integrase_H2C2 superfamily, Gypsy superfamily
Acol_gypsy_Ele32	Yes	Yes	DG	Class II	LTR	Gypsy	Agam_Ty3_gypsy_Ele32#LTR/Ty3_gypsy	-	Gypsy47-I_AG#LTR/Gypsy	LTR	344	RT_like superfamily, RT_RNaseH superfamily, RT_RNaseH_2 superfamily, RVT_1 superfamily, Gypsy superfamily, pepsin_retropepsin_like superfamily, rve superfamily, Integrase_H2C2 superfamily, Retrotrans_gag superfamily
Acol_gypsy_Ele33	Yes	No	DG	Class II	LTR	Gypsy	Agam_Ty3_gypsy_Ele33#LTR/Ty3_gypsy	-	Gypsy48-I_AG#LTR/Gypsy	LTR	376	RT_like superfamily, RNase_H_like superfamily, RT_RNaseH_2 superfamily, RT_RNaseH superfamily, RVT_1 superfamily, pepsin_retropepsin_like superfamily, rve superfamily, Integrase_H2C2 superfamily, zf-H2C2 superfamily
Acol_gypsy_Ele34	Yes	Yes	DG	Class II	LTR	Gypsy	Agam_Ty3_gypsy_Ele34#LTR/Ty3_gypsy	-	Gypsy49-I_AG#LTR/Gypsy	LTR	316	RNase_H_like superfamily, RT_RNaseH_2 superfamily, RT_RNaseH superfamily, rve superfamily, Integrase_H2C2 superfamily, zf-H2C2 superfamily, pepsin_retropepsin_like superfamily
Acol_gypsy_Ele35	Yes	Yes	DG	Class II	LTR	Gypsy	Agam_Ty3_gypsy_Ele35#LTR/Ty3_gypsy	GYPSY1_AG|Full|LTR|piler-ag-5-40-90-90_Clu-131	Gypsy1-I_AG#LTR/Gypsy	LTR	146	RT_like superfamily, pepsin_retropepsin_like superfamily, RNase_H_like superfamily, RVT_1 superfamily, RT_RNaseH_2 superfamily, RT_RNaseH superfamily, rve superfamily, Integrase_H2C2 superfamily
Acol_gypsy_Ele36	Yes	Yes	DG	Class II	LTR	Gypsy	Agam_Ty3_gypsy_Ele36#LTR/Ty3_gypsy	GYPSY2_AG|Full|LTR|piler-ag-5-40-90-90_Clu-119	Gypsy2-I_AG#LTR/Gypsy	LTR	368	RT_like superfamily, RNase_H_like superfamily, RVT_1 superfamily, RT_RNaseH_2 superfamily, RT_RNaseH superfamily, rve superfamily, Integrase_H2C2 superfamily
Acol_gypsy_Ele37	Yes	Yes	DG	Class II	LTR	Gypsy	Agam_Ty3_gypsy_Ele37#LTR/Ty3_gypsy	-	Gypsy52-I_AG#LTR/Gypsy	LTR	306	RT_like superfamily, RNase_H_like superfamily, RT_RNaseH_2 superfamily, RT_RNaseH superfamily, RVT_1 superfamily, rve superfamily, Integrase_H2C2 superfamily, zf-H2C2 superfamily
Acol_gypsy_Ele38	Yes	Yes	DG	Class II	LTR	Gypsy	Agam_Ty3_gypsy_Ele38#LTR/Ty3_gypsy	-	Gypsy53-I_AG#LTR/Gypsy	LTR	300	RT_like superfamily, RNase_H_like superfamily, RVT_1 superfamily, pepsin_retropepsin_like superfamily, RT_RNaseH_2 superfamily, RT_RNaseH superfamily, rve superfamily, Integrase_H2C2 superfamily
Acol_gypsy_Ele39	Yes	Yes	DG	Class II	LTR	Gypsy	Agam_Ty3_gypsy_Ele39#LTR/Ty3_gypsy	-	Gypsy70-I_AG#LTR/Gypsy	LTR	354	RT_like superfamily, RNase_H_like superfamily, pepsin_retropepsin_like superfamily, RVT_1 superfamily, RT_RNaseH_2 superfamily, RT_RNaseH superfamily, rve superfamily, Integrase_H2C2 superfamily, zf-H2C2 superfamily
Acol_gypsy_Ele4	Yes	Yes	DG	Class II	LTR	Gypsy	Agam_Ty3_gypsy_Ele4#LTR/Ty3_gypsy	GYSPSY15_AG|Solo-LTR|LTR|piler-ag-5-40-90-90_Clu-92	Gypsy11-I_AG#LTR/Gypsy	LTR	822	RT_like superfamily, RNase_H_like superfamily, RT_RNaseH_2 superfamily, RT_RNaseH superfamily, RVT_1 superfamily, Integrase_H2C2 superfamily, rve superfamily, zf-H2C2 superfamily
Acol_gypsy_Ele40	Yes	Yes	DG	Class II	LTR	Gypsy	Agam_Ty3_gypsy_Ele40#LTR/Ty3_gypsy	-	Gypsy55-I_AG#LTR/Gypsy	LTR	257	RT_like superfamily, RNase_H_like superfamily, RT_RNaseH_2 superfamily, RT_RNaseH superfamily, RVT_1 superfamily, rve superfamily, pepsin_retropepsin_like superfamily
Acol_gypsy_Ele41	Yes	Yes	DG	Class II	LTR	Gypsy	Agam_Ty3_gypsy_Ele41#LTR/Ty3_gypsy	-	Gypsy56-I_AG#LTR/Gypsy	LTR	225	RT_like superfamily, RNase_H_like superfamily, RT_RNaseH_2 superfamily, RT_RNaseH superfamily, rve superfamily, pepsin_retropepsin_like superfamily, Integrase_H2C2 superfamily
Acol_gypsy_Ele42	Yes	Yes	DG	Class II	LTR	Gypsy	Agam_Ty3_gypsy_Ele42#LTR/Ty3_gypsy	-	Gypsy57-I_AG#LTR/Gypsy	LTR	296	RT_like superfamily, RNase_H_like superfamily, RT_RNaseH_2 superfamily, RT_RNaseH superfamily, RVT_1 superfamily, rve superfamily, pepsin_retropepsin_like superfamily, Integrase_H2C2 superfamily, zf-H2C2 superfamily
Acol_gypsy_Ele44	Yes	Yes	DG	Class II	LTR	Gypsy	Agam_Ty3_gypsy_Ele44#LTR/Ty3_gypsy	-	Gypsy59-I_AG#LTR/Gypsy	LTR	284	RT_like superfamily, RNase_H_like superfamily, RT_RNaseH superfamily, RT_RNaseH_2 superfamily, RVT_1 superfamily, rve superfamily, pepsin_retropepsin_like superfamily, Integrase_H2C2 superfamily, zf-H2C2 superfamily, Tra5 superfamily
Acol_gypsy_Ele45	Yes	Yes	DG	Class II	LTR	Gypsy	Agam_Ty3_gypsy_Ele45#LTR/Ty3_gypsy	-	Gypsy60-I_AG#LTR/Gypsy	LTR	220	RT_like superfamily, RNase_H_like superfamily, RT_RNaseH superfamily, RT_RNaseH_2 superfamily, RVT_1 superfamily, rve superfamily, pepsin_retropepsin_like superfamily, Integrase_H2C2 superfamily
Acol_gypsy_Ele46	Yes	Yes	DG	Class II	LTR	Gypsy	Agam_Ty3_gypsy_Ele46#LTR/Ty3_gypsy	-	Gypsy61-I_AG#LTR/Gypsy	LTR	243	RT_like superfamily, RNase_H_like superfamily, RT_RNaseH_2 superfamily, RT_RNaseH superfamily, RVT_1 superfamily, rve superfamily, pepsin_retropepsin_like superfamily, Integrase_H2C2 superfamily, zf-H2C2 superfamily
Acol_gypsy_Ele47	Yes	No	DG	Class II	LTR	Gypsy	Agam_Ty3_gypsy_Ele47#LTR/Ty3_gypsy	-	Gypsy62-I_AG#LTR/Gypsy	LTR	178	RT_like superfamily, RNase_H_like superfamily, RT_RNaseH superfamily, RT_RNaseH_2 superfamily, pepsin_retropepsin_like superfamily, rve superfamily, RVT_1 superfamily, Integrase_H2C2 superfamily, rve_3 superfamily, zf-H2C2 superfamily
Acol_gypsy_Ele48	Yes	Yes	DG	Class II	LTR	Gypsy	Agam_Ty3_gypsy_Ele48#LTR/Ty3_gypsy	-	Gypsy63-I_AG#LTR/Gypsy	LTR	144	rve superfamily, rve_3 superfamily, RT_like superfamily, RNase_H_like superfamily, RT_RNaseH superfamily, RT_RNaseH_2 superfamily, pepsin_retropepsin_like superfamily, RVT_1 superfamily
Acol_gypsy_Ele49	Yes	Yes	DG	Class II	LTR	Gypsy	Agam_Ty3_gypsy_Ele49#LTR/Ty3_gypsy	-	Gypsy64-I_AG#LTR/Gypsy	LTR	189	RT_like superfamily, RNase_H_like superfamily, RT_RNaseH_2 superfamily, RT_RNaseH superfamily, pepsin_retropepsin_like superfamily, RVT_1 superfamily, rve superfamily, Integrase_H2C2 superfamily, zf-H2C2 superfamily
Acol_gypsy_Ele5	Yes	Yes	DG	Class II	LTR	Gypsy	Agam_Ty3_gypsy_Ele5#LTR/Ty3_gypsy	-	Gypsy12-I_AG#LTR/Gypsy	LTR	808	RT_like superfamily, RNase_H_like superfamily, RT_RNaseH_2 superfamily, RT_RNaseH superfamily, RVT_1 superfamily, Integrase_H2C2 superfamily, rve superfamily, pepsin_retropepsin_like superfamily, zf-H2C2 superfamily
Acol_gypsy_Ele50	Yes	Yes	DG	Class II	LTR	Gypsy	Agam_Ty3_gypsy_Ele50#LTR/Ty3_gypsy	-	Gypsy65-I_AG#LTR/Gypsy	LTR	140	RT_like superfamily, RNase_H_like superfamily, RT_RNaseH superfamily, RT_RNaseH_2 superfamily, RVT_1 superfamily, rve superfamily, Integrase_H2C2 superfamily, pepsin_retropepsin_like superfamily
Acol_gypsy_Ele51	Yes	Yes	PA	Class II	LTR	Gypsy	Agam_Ty3_gypsy_Ele51#LTR/Ty3_gypsy	-	Gypsy66-I_AG#LTR/Gypsy	LTR	196	RNase_H_like superfamily, RT_RNaseH_2 superfamily, RT_RNaseH superfamily, RT_like superfamily, pepsin_retropepsin_like superfamily, rve superfamily, Integrase_H2C2 superfamily, RVT_1 superfamily, zf-H2C2 superfamily
Acol_gypsy_Ele52	Yes	Yes	DG	Class II	LTR	Gypsy	Agam_Ty3_gypsy_Ele52#LTR/Ty3_gypsy	-	Gypsy67-I_AG#LTR/Gypsy	LTR	239	RT_like superfamily, RNase_H_like superfamily, RT_RNaseH_2 superfamily, RT_RNaseH superfamily, RVT_1 superfamily, pepsin_retropepsin_like superfamily, rve superfamily, Integrase_H2C2 superfamily, rve_3 superfamily
Acol_gypsy_Ele53	Yes	Yes	DG	Class II	LTR	Gypsy	Agam_Ty3_gypsy_Ele53#LTR/Ty3_gypsy	-	Gypsy68-I_AG#LTR/Gypsy	LTR	108	RT_like superfamily, RNase_H_like superfamily, RT_RNaseH superfamily, RT_RNaseH_2 superfamily, RVT_1 superfamily, Integrase_H2C2 superfamily, rve superfamily, pepsin_retropepsin_like superfamily, zf-H2C2 superfamily
Acol_gypsy_Ele54	Yes	No	DG	Class II	LTR	Gypsy	Aara_Ty3_gypsy_Ele12#LTR/Ty3_gypsy	-	Gypsy26-I_AG#LTR/Gypsy	LTR	195	RNase_H_like superfamily, RT_like superfamily, RT_RNaseH_2 superfamily, RT_RNaseH superfamily, rve superfamily, pepsin_retropepsin_like superfamily, Integrase_H2C2 superfamily, RVT_1 superfamily, zf-H2C2 superfamily
Acol_gypsy_Ele55	Yes	Yes	DG	Class II	LTR	Gypsy	Aara_Ty3_gypsy_Ele17#LTR/Ty3_gypsy	-	-	LTR	113	RT_like superfamily, pepsin_retropepsin_like superfamily, RVT_1 superfamily, RNase_H_like superfamily
Acol_gypsy_Ele56	Yes	Yes	DG	Class II	LTR	Gypsy	Aara_Ty3_gypsy_Ele26#LTR/Ty3_gypsy	-	-	LTR	239	RNase_H_like superfamily, RT_like superfamily, RT_RNaseH superfamily, RT_RNaseH_2 superfamily, RVT_1 superfamily, pepsin_retropepsin_like superfamily, rve superfamily, Integrase_H2C2 superfamily
Acol_gypsy_Ele57	Yes	Yes	DG	Class II	LTR	Gypsy	Aara_Ty3_gypsy_Ele3#LTR/Ty3_gypsy	-	-	LTR	136	RT_like superfamily, RNase_H_like superfamily, RT_RNaseH_2 superfamily, RT_RNaseH superfamily, RVT_1 superfamily, pepsin_retropepsin_like superfamily, Integrase_H2C2 superfamily, zf-H2C2 superfamily
Acol_gypsy_Ele58	Yes	Yes	DG	Class II	LTR	Gypsy	Aara_Ty3_gypsy_Ele7#LTR/Ty3_gypsy	-	-	LTR	188	RT_like superfamily, RNase_H_like superfamily, RT_RNaseH superfamily, RT_RNaseH_2 superfamily, RVT_1 superfamily, Integrase_H2C2 superfamily, pepsin_retropepsin_like superfamily
Acol_gypsy_Ele59	Yes	Yes	PA*	Class II	LTR	Gypsy	Aara_Ty3_gypsy_Ele8#LTR/Ty3_gypsy	-	-	Missing	0	RT_like superfamily, RNase_H_like superfamily, RT_RNaseH_2 superfamily, RT_RNaseH superfamily, RVT_1 superfamily, pepsin_retropepsin_like superfamily, rve superfamily, Integrase_H2C2 superfamily
Acol_gypsy_Ele6	Yes	Yes	DG	Class II	LTR	Gypsy	Agam_Ty3_gypsy_Ele6#LTR/Ty3_gypsy	GYPSY13_AG|Solo-LTR|LTR|piler-ag-5-40-90-90_Clu-202	Gypsy13-I_AG#LTR/Gypsy	LTR	423	RT_like superfamily, RNase_H_like superfamily, RT_RNaseH_2 superfamily, RT_RNaseH superfamily, RVT_1 superfamily, Integrase_H2C2 superfamily, rve superfamily, pepsin_retropepsin_like superfamily, zf-H2C2 superfamily
Acol_gypsy_Ele60	Yes	Yes	DG	Class II	LTR	Gypsy	Amel_Ty3_Gypsy_Ele1#LTR/Ty3_gypsy	GYPSY|Remnant|LTR|piler-ag-5-40-90-90_Clu-220	-	LTR	197	RT_like superfamily, RNase_H_like superfamily, RT_RNaseH_2 superfamily, RVT_1 superfamily, RT_RNaseH superfamily, rve superfamily, Integrase_H2C2 superfamily, zf-CCHC superfamily, pepsin_retropepsin_like superfamily, ZnF_C2HC superfamily
Acol_gypsy_Ele61	Yes	Yes	DG	Class II	LTR	Gypsy	Amer_Ty3_Gypsy_Ele10#LTR/Ty3_gypsy	-	-	LTR	301	RT_like superfamily, RNase_H_like superfamily, RT_RNaseH_2 superfamily, RT_RNaseH superfamily, rve superfamily, RVT_1 superfamily, pepsin_retropepsin_like superfamily, Integrase_H2C2 superfamily, rve_3 superfamily
Acol_gypsy_Ele62	Yes	Yes	PA*	Class II	LTR	Gypsy	Amer_Ty3_Gypsy_Ele12#LTR/Ty3_gypsy	-	Gypsy69-I_AG#LTR/Gypsy	Missing	0	RT_like superfamily, RNase_H_like superfamily, RT_RNaseH superfamily, RT_RNaseH_2 superfamily, RVT_1 superfamily, rve superfamily, Integrase_H2C2 superfamily, pepsin_retropepsin_like superfamily, Tra5 superfamily
Acol_gypsy_Ele63	Yes	Yes	DG	Class II	LTR	Gypsy	Amer_Ty3_Gypsy_Ele14#LTR/Ty3_gypsy	-	Gypsy24-I_AG#LTR/Gypsy	LTR	118	RNase_H_like superfamily, RT_RNaseH superfamily, RT_RNaseH_2 superfamily, Integrase_H2C2 superfamily, zf-H2C2 superfamily, pepsin_retropepsin_like superfamily
Acol_gypsy_Ele65	Yes	Yes	PA	Class II	LTR	Gypsy	Amer_Ty3_Gypsy_Ele24#LTR/Ty3_gypsy	GYPSY3_AG|Full|LTR|piler-ag-5-40-90-90_Clu-182	Gypsy3-I_AG#LTR/Gypsy	LTR	141	RT_like superfamily, RNase_H_like superfamily, RT_RNaseH superfamily, RT_RNaseH_2 superfamily, rve superfamily, pepsin_retropepsin_like superfamily, RVT_1 superfamily, Integrase_H2C2 superfamily
Acol_gypsy_Ele66	Yes	Yes	PA*	Class II	LTR	Gypsy	Amer_Ty3_Gypsy_Ele27#LTR/Ty3_gypsy	-	-	Missing	0	RT_like superfamily, RNase_H_like superfamily, RT_RNaseH superfamily, RT_RNaseH_2 superfamily, RVT_1 superfamily, rve superfamily, Integrase_H2C2 superfamily, pepsin_retropepsin_like superfamily, Tra5 superfamily, rve_3 superfamily
Acol_gypsy_Ele67	Yes	Yes	DG	Class II	LTR	Gypsy	Amer_Ty3_Gypsy_Ele28#LTR/Ty3_gypsy	GYPSY9_AG|Fragment|LTR|piler-ag-5-40-90-90_Clu-122	Gypsy9-I_AG#LTR/Gypsy	LTR	814	RT_like superfamily, RVT_1 superfamily, pepsin_retropepsin_like superfamily, RNase_H_like superfamily, RT_RNaseH superfamily, RT_RNaseH_2 superfamily, Integrase_H2C2 superfamily, rve superfamily
Acol_gypsy_Ele68	Yes	Yes	DG	Class II	LTR	Gypsy	Amer_Ty3_Gypsy_Ele3#LTR/Ty3_gypsy	GYPSY8_AG|Solo-LTR|LTR|piler-ag-5-40-90-90_Clu-187	-	LTR	875
Acol_gypsy_Ele69	Yes	Yes	DG	Class II	LTR	Gypsy	Amer_Ty3_Gypsy_Ele33#LTR/Ty3_gypsy	-	-	LTR	128	pepsin_retropepsin_like superfamily, RT_like superfamily, RVT_1 superfamily, RNase_H_like superfamily, RT_RNaseH_2 superfamily, RT_RNaseH superfamily, rve superfamily, Integrase_H2C2 superfamily
Acol_gypsy_Ele7	Yes	Yes	DG	Class II	LTR	Gypsy	Agam_Ty3_gypsy_Ele7#LTR/Ty3_gypsy	-	Gypsy14-I_AG#LTR/Gypsy	LTR	407	RT_like superfamily, RT_RNaseH_2 superfamily, RT_RNaseH superfamily, RNase_H_like superfamily, RVT_1 superfamily, Integrase_H2C2 superfamily, rve superfamily, pepsin_retropepsin_like superfamily
Acol_gypsy_Ele70	Yes	No	DG	Class II	LTR	Gypsy	Amer_Ty3_Gypsy_Ele38#LTR/Ty3_gypsy	-	Gypsy25-I_AG#LTR/Gypsy	LTR	225	RT_like superfamily, RNase_H_like superfamily, RT_RNaseH_2 superfamily, RT_RNaseH superfamily, rve superfamily, RVT_1 superfamily, pepsin_retropepsin_like superfamily, rve_3 superfamily, Tra5 superfamily
Acol_gypsy_Ele71	Yes	Yes	DG	Class II	LTR	Gypsy	Amer_Ty3_Gypsy_Ele41#LTR/Ty3_gypsy	-	-	LTR	268	RT_like superfamily, pepsin_retropepsin_like superfamily, RVT_1 superfamily, RNase_H_like superfamily, RT_RNaseH_2 superfamily, RT_RNaseH superfamily, rve superfamily, Integrase_H2C2 superfamily, zf-H2C2 superfamily
Acol_gypsy_Ele73	Yes	Yes	DG	Class II	LTR	Gypsy	Amer_Ty3_Gypsy_Ele8#LTR/Ty3_gypsy	-	-	LTR	313	RNase_H_like superfamily, RT_RNaseH_2 superfamily, RT_RNaseH superfamily, rve superfamily, Integrase_H2C2 superfamily, zf-H2C2 superfamily, RT_like superfamily, RVT_1 superfamily
Acol_gypsy_Ele74	Yes	Yes	PA	Class II	LTR	Gypsy	Amer_Ty3_Gypsy_Ele9#LTR/Ty3_gypsy	-	RETRO43_AG_LTR#LTR/Gypsy	LTR	242	RNase_H_like superfamily, RT_RNaseH superfamily, RT_RNaseH_2 superfamily, Integrase_H2C2 superfamily, rve superfamily, zf-H2C2 superfamily, Retrotrans_gag superfamily
Acol_gypsy_Ele75	Yes	Yes	DG	Class II	LTR	Gypsy	Aqua_Ty3_Gypsy_Ele2#LTR/Ty3_gypsy	-	Gypsy21-I_AG#LTR/Gypsy	LTR	160	RT_like superfamily, RNase_H_like superfamily, RT_RNaseH superfamily, RT_RNaseH_2 superfamily, rve superfamily, RVT_1 superfamily, pepsin_retropepsin_like superfamily, Integrase_H2C2 superfamily, Tra5 superfamily, zf-H2C2 superfamily
Acol_gypsy_Ele76	Yes	Yes	DG	Class II	LTR	Gypsy	Aste_Ty3_gypsy_Ele7#LTR/Ty3_gypsy	GYPSY|Remnant|LTR|piler-ag-5-40-90-90_Clu-211	-	LTR	315	RT_like superfamily, RNase_H_like superfamily, RT_RNaseH superfamily, RT_RNaseH_2 superfamily, RVT_1 superfamily, rve superfamily, pepsin_retropepsin_like superfamily, Integrase_H2C2 superfamily, rve_3 superfamily, zf-H2C2 superfamily
Acol_gypsy_Ele77	Yes	Yes	DG	Class II	LTR	Gypsy	-	-	Gypsy19-I_AG#LTR/Gypsy	LTR	136	RNase_H_like superfamily, RT_like superfamily, RT_RNaseH_2 superfamily, RT_RNaseH superfamily, rve superfamily, Integrase_H2C2 superfamily, RVT_1 superfamily, pepsin_retropepsin_like superfamily
Acol_gypsy_Ele78	Yes	Yes	DG	Class II	LTR	Gypsy	-	-	Gypsy20-I_AG#LTR/Gypsy	LTR	270	RT_like superfamily, RNase_H_like superfamily, RT_RNaseH_2 superfamily, RT_RNaseH superfamily, rve superfamily, pepsin_retropepsin_like superfamily, RVT_1 superfamily, Integrase_H2C2 superfamily
Acol_gypsy_Ele79	Yes	Yes	PA	Class II	LTR	Gypsy	-	-	Gypsy22-I_AG#LTR/Gypsy	LTR	172	RT_like superfamily, RNase_H_like superfamily, RT_RNaseH_2 superfamily, RT_RNaseH superfamily, rve superfamily, RVT_1 superfamily, pepsin_retropepsin_like superfamily, Integrase_H2C2 superfamily, zf-H2C2 superfamily
Acol_gypsy_Ele8	Yes	Yes	DG	Class II	LTR	Gypsy	Agam_Ty3_gypsy_Ele8#LTR/Ty3_gypsy	-	Gypsy15-I_AG#LTR/Gypsy	LTR	833	RT_like superfamily, RNase_H_like superfamily, RT_RNaseH_2 superfamily, RT_RNaseH superfamily, RVT_1 superfamily, Integrase_H2C2 superfamily, rve superfamily, zf-H2C2 superfamily
Acol_gypsy_Ele80	Yes	Yes	DG	Class II	LTR	Gypsy	-	-	Gypsy23-I_AG#LTR/Gypsy	LTR	162	RT_like superfamily, RNase_H_like superfamily, RT_RNaseH_2 superfamily, RT_RNaseH superfamily, RVT_1 superfamily, rve superfamily, pepsin_retropepsin_like superfamily, Integrase_H2C2 superfamily, zf-H2C2 superfamily
Acol_gypsy_Ele81	Yes	No	DG	Class II	LTR	Gypsy	-	-	Gypsy28-I_AG#LTR/Gypsy	LTR	219	RT_like superfamily, RNase_H_like superfamily, RT_RNaseH_2 superfamily, RT_RNaseH superfamily, rve superfamily, RVT_1 superfamily, Integrase_H2C2 superfamily, pepsin_retropepsin_like superfamily, zf-H2C2 superfamily
Acol_gypsy_Ele82	Yes	Yes	PA	Class II	LTR	Gypsy	-	GYSPSY32_AG|Solo-LTR|LTR|piler-ag-5-40-90-90_Clu-143	-	LTR	229	RT_like superfamily, RNase_H_like superfamily, RT_RNaseH_2 superfamily, RT_RNaseH superfamily, RVT_1 superfamily, rve superfamily, Integrase_H2C2 superfamily, pepsin_retropepsin_like superfamily
Acol_gypsy_Ele83	New	Yes	PA	Class II	LTR	Gypsy	-	-	-	LTR	179	RT_like superfamily, RNase_H_like superfamily, RT_RNaseH_2 superfamily, RT_RNaseH superfamily, RVT_1 superfamily, rve superfamily, Integrase_H2C2 superfamily, pepsin_retropepsin_like superfamily
Acol_gypsy_Ele84	New	Yes	DG	Class II	LTR	Gypsy	-	-	-	LTR	275	RT_like superfamily, RNase_H_like superfamily, RT_RNaseH_2 superfamily, RT_RNaseH superfamily, RVT_1 superfamily, rve superfamily, pepsin_retropepsin_like superfamily
Acol_gypsy_Ele85	Yes	Yes	DG	Class II	LTR	Gypsy	-	GYPSY9_AG|Solo-LTR|LTR|piler-ag-5-40-90-90_Clu-236	Gypsy9-LTR_AG#LTR/Gypsy	LTR	761
Acol_gypsy_Ele86	New	Yes	DG	Class II	LTR	Gypsy	-	-	-	LTR	189	RT_like superfamily, RNase_H_like superfamily, RT_RNaseH superfamily, RT_RNaseH_2 superfamily, RVT_1 superfamily, Integrase_H2C2 superfamily, rve superfamily, zf-H2C2 superfamily
Acol_gypsy_Ele87	New	Yes	DG	Class II	LTR	Gypsy	-	-	-	LTR	302	Gypsy superfamily, RT_like superfamily, RNase_H_like superfamily, RT_RNaseH superfamily, RT_RNaseH_2 superfamily, RVT_1 superfamily, rve superfamily, Integrase_H2C2 superfamily
Acol_gypsy_Ele88	Yes	Yes	DG	Class II	LTR	Gypsy	-	-	Gypsy27-I_AG#LTR/Gypsy	LTR	205	RT_like superfamily, RNase_H_like superfamily, RT_RNaseH_2 superfamily, RT_RNaseH superfamily, rve superfamily, pepsin_retropepsin_like superfamily, RVT_1 superfamily, Integrase_H2C2 superfamily, rve_3 superfamily, Tra5 superfamily, zf-H2C2 superfamily
Acol_gypsy_Ele89	New	Yes	DG	Class II	LTR	Gypsy	-	-	-	Missing	0	rve superfamily, Integrase_H2C2 superfamily
Acol_gypsy_Ele9	Yes	Yes	DG	Class II	LTR	Gypsy	Agam_Ty3_gypsy_Ele9#LTR/Ty3_gypsy	GYPSY16_AG|Solo-LTR|LTR|piler-ag-5-40-90-90_Clu-145	Gypsy16-I_AG#LTR/Gypsy	LTR	759	pepsin_retropepsin_like superfamily, RT_like superfamily, RVT_1 superfamily, RNase_H_like superfamily, RT_RNaseH_2 superfamily, RT_RNaseH superfamily, Integrase_H2C2 superfamily
Acol_gypsy_Ele90	New	Yes	DG	Class II	LTR	Gypsy	-	-	-	TIR	22	RT_like superfamily, RNase_H_like superfamily, RT_RNaseH_2 superfamily, RT_RNaseH superfamily, RVT_1 superfamily, pepsin_retropepsin_like superfamily, rve superfamily, Integrase_H2C2 superfamily
Acol_gypsy_Ele91	New	Yes	PA*	Class II	LTR	Gypsy	-	-	-	Missing	0	RT_like superfamily, RNase_H_like superfamily, RT_RNaseH_2 superfamily, RT_RNaseH superfamily, RVT_1 superfamily, rve superfamily, Integrase_H2C2 superfamily, pepsin_retropepsin_like superfamily
Acol_gypsy_Ele92	New	Yes	DG	Class II	LTR	Gypsy	-	-	-	LTR	273	RT_like superfamily, RNase_H_like superfamily, RT_RNaseH_2 superfamily, RT_RNaseH superfamily, RVT_1 superfamily, rve superfamily, pepsin_retropepsin_like superfamily, Integrase_H2C2 superfamily, rve_3 superfamily
Acol_gypsy_Ele93	New	Yes	DG	Class II	LTR	Gypsy	-	-	-	LTR	249	RT_like superfamily, RNase_H_like superfamily, RT_RNaseH_2 superfamily, RT_RNaseH superfamily, rve superfamily, RVT_1 superfamily, pepsin_retropepsin_like superfamily, Integrase_H2C2 superfamily
Acol_gypsy_Ele94	New	Yes	DG	Class II	LTR	Gypsy	-	-	-	LTR	207	RNase_H_like superfamily, RT_RNaseH superfamily, RT_RNaseH_2 superfamily, RT_like superfamily, pepsin_retropepsin_like superfamily, rve superfamily, RVT_1 superfamily, Integrase_H2C2 superfamily, zf-H2C2 superfamily
Acol_gypsy_Ele95	New	Yes	DG	Class II	LTR	Gypsy	-	-	-	LTR	260	RT_like superfamily, RNase_H_like superfamily, pepsin_retropepsin_like superfamily, RVT_1 superfamily, RT_RNaseH_2 superfamily, RT_RNaseH superfamily, rve superfamily, Integrase_H2C2 superfamily, Tra5 superfamily
Acol_hAT_Ele1	Yes	No	DG	Class I	DNA	hAT	Agam_hAT_Ele1#DNA/hAT	-	-	Missing	0
Acol_hAT_Ele10	Yes	Yes	PNA	Class I	DNA	hAT	-	HATN1_AG|NA|TIR|piler-ag-5-40-90-90_Clu-181	HATN1_AG#DNA/hAT-Charlie	TIR	15
Acol_hAT_Ele11	Yes	Yes	PNA	Class I	DNA	hAT	-	HATN1_AG|NA|TIR|piler-ag-5-40-90-90_Clu-108	-	TIR	15
Acol_hAT_Ele12	New	Yes	PNA	Class I	DNA	hAT	-	-	-	TIR	15
Acol_hAT_Ele13	New	Yes	PNA	Class I	DNA	hAT	-	-	-	TIR	13
Acol_hAT_Ele14	Yes	Yes	DG	Class I	DNA	hAT	-	-	HATN4_AG#DNA/hAT-Ac	Missing	0
Acol_hAT_Ele15	Yes	Yes	PA*	Class I	DNA	hAT	-	-	PegasusA#DNA/hAT-Pegasus	Missing	0	Dimer_Tnp_hAT superfamily
Acol_hAT_Ele16	New	Yes	PNA	Class I	DNA	hAT	-	-	-	TIR	14
Acol_hAT_Ele2	Yes	Yes	DG	Class I	DNA	hAT	Agam_hAT_Ele2#DNA/hAT	-	-	Missing	0
Acol_hAT_Ele3	Yes	No	PNA	Class I	DNA	hAT	Agam_hAT_Ele3#DNA/hAT	-	-	TIR	10
Acol_hAT_Ele4	Yes	No	PA	Class I	DNA	hAT	Agam_hAT_Ele4#DNA/hAT	-	-	TIR	13	DUF4371 superfamily
Acol_hAT_Ele5	Yes	No	PA*	Class I	DNA	hAT	Agam_hAT_Ele5#DNA/hAT	-	hAT-2_AG#DNA/hAT-Ac	Missing	0	zf-BED superfamily
Acol_hAT_Ele6	Yes	Yes	PA*	Class I	DNA	hAT	Agam_hAT_Ele6#DNA/Tc1	-	HAT1_AG#DNA/hAT-Ac	Missing	0	Dimer_Tnp_hAT superfamily, DUF659 superfamily, zf-BED superfamily, ZnF_TTF superfamily
Acol_hAT_Ele7	Yes	Yes	PA	Class I	DNA	hAT	Aara_hAT_Ele2#DNA/hAT	-	-	TIR	12	DUF4371 superfamily
Acol_hAT_Ele8	Yes	Yes	PNA	Class I	DNA	hAT	Amer_Ty3_Gypsy_Ele11#LTR/Ty3_gypsy	-	HATN2_AG#DNA/hAT-Tip100	TIR	11
Acol_hAT_Ele9	Yes	Yes	PNA	Class I	DNA	hAT	-	-	hAT-2N_AG#DNA/hAT-Ac	TIR	12
Acol_helitron_Ele1	Yes	Yes	DG	Class I	DNA	Helitron	-	HELITRON2N_AG|NA|TIR|piler-ag-5-40-90-90_Clu-129	Helitron2N_AG#RC/Helitron	NA	-
Acol_I_Ele1	Yes	Yes	DG	Class II	LINE	I	Agam_I_Ele1#LINE/I	-	-	NA	-	RNase_H_like superfamily
Acol_I_Ele2	Yes	Yes	PA	Class II	LINE	I	Agam_I_Ele2#LINE/I	I_ELE2|Full|NLTR|piler-ag-5-40-90-90_Clu-152	Ag-I-2#LINE/I	NA	-	RT_like superfamily, RNase_H_like superfamily, RVT_1 superfamily, EEP superfamily
Acol_I_Ele3	Yes	Yes	PA	Class II	LINE	I	Agam_I_Ele3#LINE/I	-	AARA8_AG#LINE/I	NA	-	TMF_DNA_bd superfamily, RT_like superfamily, RNase_H_like superfamily, RVT_1 superfamily, EEP superfamily
Acol_I_Ele4	Yes	Yes	PA	Class II	LINE	I	Agam_I_Ele4#LINE/I	-	-	NA	-	RT_like superfamily, RVT_1 superfamily, RNase_H_like superfamily, EEP superfamily
Acol_I_Ele5	Yes	Yes	PA	Class II	LINE	I	Agam_I_Ele5#LINE/I	-	-	NA	-	RT_like superfamily, RVT_1 superfamily, RNase_H_like superfamily, EEP superfamily
Acol_I_Ele6	Yes	Yes	DG	Class II	LINE	I	Agam_I_Ele6#LINE/I	-	-	NA	-
Acol_I_Ele7	Yes	Yes	DG	Class II	LINE	I	Amer_MR_I-Ele_3#LINE/I	-	-	NA	-	RT_like superfamily, RVT_1 superfamily
Acol_Jockey_Ele1	Yes	Yes	PA	Class II	LINE	Jockey	Agam_Jockey_Ele1#LINE/Jockey	-	Ag-Jock-1#LINE/I-Jockey	NA	-	RT_like superfamily, RVT_1 superfamily, EEP superfamily
Acol_Jockey_Ele10	Yes	Yes	DG	Class II	LINE	Jockey	Agam_Jockey_Ele10#LINE/Jockey	-	-	NA	-	RT_like superfamily, RVT_1 superfamily
Acol_Jockey_Ele11	Yes	Yes	DG	Class II	LINE	Jockey	Agam_Jockey_Ele11#LINE/Jockey	JOCKEY_ELE11|Fragment|NLTR|piler-ag-5-40-90-90_Clu-23	-	NA	-
Acol_Jockey_Ele12	Yes	Yes	PA	Class II	LINE	Jockey	Agam_Jockey_Ele12#LINE/Jockey	JOCKEY_ELE12|Full|NLTR|piler-ag-5-40-90-90_Clu-183	Ag-Jock-12#LINE/I-Jockey	NA	-	RT_like superfamily, RVT_1 superfamily, EEP superfamily
Acol_Jockey_Ele13	Yes	No	PA	Class II	LINE	Jockey	Agam_Jockey_Ele13#LINE/Jockey	-	Ag-Jock-13#LINE/I-Jockey	NA	-	RT_like superfamily, RVT_1 superfamily, EEP superfamily
Acol_Jockey_Ele14	Yes	Yes	DG	Class II	LINE	Jockey	Agam_Jockey_Ele14#LINE/Jockey	JOCKEY_ELE14|Full|NLTR|piler-ag-5-40-90-90_Clu-120	Ag-Jen-1#LINE/I-Jockey	NA	-	EEP superfamily, RT_like superfamily, RVT_1 superfamily
Acol_Jockey_Ele15	Yes	Yes	PA	Class II	LINE	Jockey	Agam_Jockey_Ele15#LINE/Jockey	-	-	NA	-	RT_like superfamily, RVT_1 superfamily, EEP superfamily
Acol_Jockey_Ele16	Yes	No	PA	Class II	LINE	Jockey	Agam_Jockey_Ele16#LINE/Jockey	-	-	NA	-	EEP superfamily, RT_like superfamily, RVT_1 superfamily
Acol_Jockey_Ele17	Yes	Yes	PA	Class II	LINE	Jockey	Agam_Jockey_Ele17#LINE/Jockey	-	-	NA	-	EEP superfamily, RT_like superfamily, RVT_1 superfamily
Acol_Jockey_Ele18	Yes	Yes	PA	Class II	LINE	Jockey	Agam_Jockey_Ele18#LINE/Jockey	-	-	NA	-	RT_like superfamily, RVT_1 superfamily, EEP superfamily
Acol_Jockey_Ele19	Yes	Yes	PA	Class II	LINE	Jockey	Agam_Jockey_Ele19#LINE/Jockey	-	-	NA	-	RT_like superfamily, RVT_1 superfamily, EEP superfamily
Acol_Jockey_Ele20	Yes	No	DG	Class II	LINE	Jockey	Agam_Jockey_Ele20#LINE/Jockey	-	-	NA	-	EEP superfamily
Acol_Jockey_Ele21	Yes	Yes	PA	Class II	LINE	Jockey	Agam_Jockey_Ele21#LINE/Jockey	-	-	NA	-	RT_like superfamily, RVT_1 superfamily, EEP superfamily, group_II_RT_mat superfamily
Acol_Jockey_Ele22	Yes	Yes	PA	Class II	LINE	Jockey	Agam_Jockey_Ele22#LINE/Jockey	-	-	NA	-	EEP superfamily, RT_like superfamily, RVT_1 superfamily
Acol_Jockey_Ele23	Yes	Yes	PA	Class II	LINE	Jockey	Agam_Jockey_Ele23#LINE/Jockey	-	-	NA	-	EEP superfamily, RT_like superfamily, RVT_1 superfamily
Acol_Jockey_Ele24	Yes	Yes	PA	Class II	LINE	Jockey	Agam_Jockey_Ele24#LINE/Jockey	JOCKEY_ELE24|Full|NLTR|piler-ag-5-40-90-90_Clu-159	Ag-Jen-11#LINE/I-Jockey	NA	-	RT_like superfamily, RVT_1 superfamily, EEP superfamily
Acol_Jockey_Ele25	Yes	Yes	DG	Class II	LINE	Jockey	Agam_Jockey_Ele25#LINE/Jockey	-	-	NA	-	EEP superfamily
Acol_Jockey_Ele26	Yes	Yes	PA	Class II	LINE	Jockey	Aqua_QD_Jck_Ele1#LINE/Jockey	-	-	NA	-	RT_like superfamily, RVT_1 superfamily, EEP superfamily
Acol_Jockey_Ele27	New	Yes	DG	Class II	LINE	Jockey	-	-	-	NA	-
Acol_Jockey_Ele28	New	Yes	DG	Class II	LINE	Jockey	-	-	-	NA	-
Acol_Jockey_Ele3	Yes	Yes	DG	Class II	LINE	Jockey	Agam_Jockey_Ele3#LINE/Jockey	-	-	NA	-	RT_like superfamily, RVT_1 superfamily
Acol_Jockey_Ele4	Yes	No	PA	Class II	LINE	Jockey	Agam_Jockey_Ele4#LINE/Jockey	-	-	NA	-	RT_like superfamily, RVT_1 superfamily, EEP superfamily
Acol_Jockey_Ele5	Yes	No	DG	Class II	LINE	Jockey	Agam_Jockey_Ele5#LINE/Jockey	-	-	NA	-
Acol_Jockey_Ele6	Yes	Yes	PA	Class II	LINE	Jockey	Agam_Jockey_Ele6#LINE/Jockey	-	-	NA	-	RT_like superfamily, RVT_1 superfamily, EEP superfamily
Acol_Jockey_Ele7	Yes	Yes	PA	Class II	LINE	Jockey	Agam_Jockey_Ele7#LINE/Jockey	-	-	NA	-	RT_like superfamily, RVT_1 superfamily, EEP superfamily
Acol_Jockey_Ele8	Yes	No	PA	Class II	LINE	Jockey	Agam_Jockey_Ele8#LINE/Jockey	-	-	NA	-	RT_like superfamily, RVT_1 superfamily, EEP superfamily, YkfC superfamily
Acol_Jockey_Ele9	Yes	No	PA	Class II	LINE	Jockey	Agam_Jockey_Ele9#LINE/Jockey	-	-	NA	-	RT_like superfamily, RVT_1 superfamily, EEP superfamily
Acol_L1_Ele2	Yes	Yes	PA	Class II	LINE	L1	Agam_L1_Ele2#LINE/L1	-	ISEAG1#LINE/L1	NA	-	RT_like superfamily, EEP superfamily, RVT_1 superfamily
Acol_L1_Ele4	Yes	Yes	PA	Class II	LINE	L1	Agam_L1_Ele4#LINE/L1	-	-	NA	-	RT_like superfamily, EEP superfamily, RVT_1 superfamily
Acol_L1_Ele5	Yes	Yes	PA	Class II	LINE	L1	Agam_L1_Ele5#LINE/L1	-	Ag-L1-5#LINE/L1-Tx1	NA	-	RT_like superfamily, EEP superfamily, RVT_1 superfamily, zf-RVT superfamily
Acol_L1_Ele6	Yes	Yes	PA	Class II	LINE	L1	Aara_AR_L1_Ele3#LINE/L1	-	-	NA	-	RT_like superfamily, EEP superfamily, RVT_1 superfamily
Acol_L1_Ele7	Yes	Yes	PA	Class II	LINE	L1	Amer_MR_L1-Ele_1#LINE/L1	-	-	NA	-	RT_like superfamily, EEP superfamily, RVT_1 superfamily
Acol_L1_Ele8	New	Yes	PA	Class II	LINE	L1	-	-	-	NA	-	RT_like superfamily, EEP superfamily, RVT_1 superfamily, zf-RVT superfamily
Acol_L2_Ele1	Yes	Yes	PA	Class II	LINE	L2	Agam_L2_Ele1#LINE/L2	-	L2B-1_AG#LINE/L2	NA	-	PHD_SF superfamily, RVT_1 superfamily, EEP superfamily
Acol_L2_Ele3	Yes	Yes	PA	Class II	LINE	L2	Agam_L2_Ele3#LINE/L2	-	CR1-1_AG#LINE/L2	NA	-	RT_like superfamily, RVT_1 superfamily, EEP superfamily, PHD_SF superfamily
Acol_L2_Ele4	Yes	Yes	PA	Class II	LINE	L2	-	-	CR1-1a_AG#LINE/L2	NA	-	PHD_SF superfamily, RT_like superfamily, RVT_1 superfamily, EEP superfamily
Acol_L2_Ele5	New	Yes	PA	Class II	LINE	L2	-	-	-	NA	-	PHD_SF superfamily, RT_like superfamily, RVT_1 superfamily, EEP superfamily
Acol_Loner_Ele1	Yes	Yes	PA	Class II	LINE	Loner	Agam_Loner_Ele1#LINE/Loner	-	Ag-Loner-1#LINE/I	NA	-	RT_like superfamily, RNase_H_like superfamily, RVT_1 superfamily, EEP superfamily
Acol_Loner_Ele2	Yes	Yes	PA	Class II	LINE	Loner	Agam_Loner_Ele2#LINE/Loner	-	-	NA	-	RT_like superfamily, RNase_H_like superfamily, EEP superfamily, RVT_1 superfamily
Acol_Loner_Ele3	New	Yes	PA	Class II	LINE	Loner	-	-	-	NA	-	RT_like superfamily, RNase_H_like superfamily, RVT_1 superfamily, EEP superfamily, group_II_RT_mat superfamily
Acol_LTR_Ele1	Yes	Yes	PNA	Class II	LTR	LARD	Amer_Ty3_Gypsy_Ele43#LTR/Ty3_gypsy	-	-	LTR	313	-
Acol_LTR_Ele2	New	Yes	PNA	Class II	LTR	LARD	-	-	-	LTR	315	-
Acol_LTR_Ele3	New	Yes	PNA	Class II	LTR	LARD	-	-	-	LTR	374	-
Acol_LTR_Ele4	New	Yes	PNA	Class II	LTR	TRIM	-	-	-	LTR	248	-
Acol_LTR_Ele5	Yes	Yes	PNA	Class II	LTR	TRIM	Amer_Ty3_Gypsy_Ele23#LTR/Ty3_gypsy	-	-	LTR	308	-
Acol_LTR_Ele6	New	Yes	PNA	Class II	LTR	TRIM	-	-	-	LTR	311	-
Acol_m2bp_Ele1	Yes	Yes	PNA	Class I	DNA	MITE	Aara_m2bp_Ele1#MITEs/mTA	-	-	TIR	13	-
Acol_m2bp_Ele10	Yes	Yes	PNA	Class I	DNA	MITE	Agam_m2bp_Ele10#MITEs/mTA	-	-	TIR	16	-
Acol_m2bp_Ele11	Yes	Yes	PNA	Class I	DNA	MITE	Agam_m2bp_Ele11#MITEs/mTA	-	-	TIR	11	-
Acol_m2bp_Ele12	Yes	No	PNA	Class I	DNA	MITE	Aara_m2bp_Ele3#MITEs/mTA	Novel|MITE-like|TIR|piler-ag-5-40-90-90_Clu-31	-	TIR	13	-
Acol_m2bp_Ele2	Yes	Yes	PNA	Class I	DNA	MITE	Agam_m2bp_Ele2#MITEs/mTA	-	MarinerN10_AG#DNA/TcMar-Tc1	TIR	14	-
Acol_m2bp_Ele3	Yes	Yes	PNA	Class I	DNA	MITE	Amel_m2bp_Ele3#MITEs/mTA	-	-	TIR	12	-
Acol_m2bp_Ele5	Yes	Yes	PNA	Class I	DNA	MITE	Aara_m2bp_Ele5#MITEs/mTA	Novel|MITE-like|TIR|piler-ag-5-40-90-90_Clu-50	-	TIR	12	-
Acol_m2bp_Ele8	Yes	Yes	PNA	Class I	DNA	MITE	Agam_m2bp_Ele8#MITEs/mTA	TC1-TOPI|Remnant|TIR|piler-ag-5-40-90-90_Clu-81	-	TIR	11	-
Acol_m3bp_Ele1	Yes	Yes	PNA	Class I	DNA	MITE	Agam_m3bp_Ele1#MITEs/m3bp	-	-	TIR	44	-
Acol_m3bp_Ele10	Yes	Yes	PNA	Class I	DNA	MITE	Agam_m3bp_Ele10#MITEs/m3bp	-	-	TIR	36	-
Acol_m3bp_Ele11	Yes	No	PNA	Class I	DNA	MITE	Amer_m3bp_Ele11#MITEs/m3bp	-	-	TIR	39	-
Acol_m3bp_Ele12	Yes	Yes	PNA	Class I	DNA	MITE	Agam_m3bp_Ele12#MITEs/m3bp	Novel|MITE-like|TIR|piler-ag-5-40-90-90_Clu-38	Clu-38_AG#DNA	TIR	39	-
Acol_m3bp_Ele14	Yes	Yes	PNA	Class I	DNA	MITE	Aara_m3bp_Ele14#MITEs/m3bp	Novel|MITE-like|TIR|piler-ag-5-40-90-90_Clu-44	Clu-44_AG#DNA	TIR	18	-
Acol_m3bp_Ele15	Yes	Yes	PNA	Class I	DNA	MITE	Agam_m3bp_Ele15#MITEs/m3bp	-	HARBINGER-N1_AG#DNA/PIF-Harbinger	TIR	86	-
Acol_m3bp_Ele17	Yes	Yes	PNA	Class I	DNA	MITE	Aara_m3bp_Ele17#MITEs/m3bp	-	-	TIR	26	-
Acol_m3bp_Ele19	Yes	Yes	PNA	Class I	DNA	MITE	Aara_m3bp_Ele19#MITEs/m3bp	-	-	TIR	45	-
Acol_m3bp_Ele2	Yes	Yes	PNA	Class I	DNA	MITE	Amel_m3bp_Ele2#MITEs/m3bp	Tc1_Sunny|Fragment|TIR|piler-ag-5-40-90-90_Clu-3	-	TIR	10	-
Acol_m3bp_Ele21	Yes	Yes	PNA	Class I	DNA	MITE	Agam_m3bp_Ele21#MITEs/m3bp	-	DNA-1_AG#DNA/PIF-Harbinger	TIR	51	-
Acol_m3bp_Ele22	Yes	Yes	PNA	Class I	DNA	MITE	Amer_m3bp_Ele22#MITEs/m3bp	-	-	TIR	77	-
Acol_m3bp_Ele23	Yes	Yes	PNA	Class I	DNA	MITE	Agam_m3bp_Ele23#MITEs/m3bp	-	-	TIR	15	-
Acol_m3bp_Ele24	Yes	Yes	PNA	Class I	DNA	MITE	Aqua_m3bp_Ele24#MITEs/m3bp	-	-	TIR	76	-
Acol_m3bp_Ele25	Yes	Yes	PNA	Class I	DNA	MITE	Agam_m3bp_Ele25#MITEs/m3bp	Novel|MITE-like|TIR|piler-ag-5-40-90-90_Clu-19	-	TIR	24	-
Acol_m3bp_Ele27	Yes	Yes	PNA	Class I	DNA	MITE	Amel_m3bp_Ele27#MITEs/m3bp	-	-	TIR	52	-
Acol_m3bp_Ele28	Yes	No	PNA	Class I	DNA	MITE	Aara_m3bp_Ele28#MITEs/m3bp	-	-	TIR	52	-
Acol_m3bp_Ele3	Yes	Yes	PNA	Class I	DNA	MITE	Amel_m3bp_Ele3#MITEs/m3bp	-	-	TIR	25	-
Acol_m3bp_Ele4	Yes	No	PNA	Class I	DNA	MITE	Agam_m3bp_Ele4#MITEs/m3bp	-	-	TIR	54	-
Acol_m3bp_Ele6	Yes	Yes	PNA	Class I	DNA	MITE	Aara_m3bp_Ele6#MITEs/m3bp	HARBINGERN1_AG|NA|TIR|piler-ag-5-40-90-90_Clu-29	HarbingerN1_AG#DNA/PIF-Harbinger	TIR	48	-
Acol_m3bp_Ele7	Yes	Yes	PNA	Class I	DNA	MITE	Agam_m3bp_Ele7#MITEs/m3bp	Novel|MITE-like|TIR|piler-ag-5-40-90-90_Clu-27	-	TIR	32	-
Acol_m3bp_Ele8	Yes	No	PNA	Class I	DNA	MITE	Aara_m3bp_Ele8#MITEs/m3bp	-	-	TIR	39	-
Acol_m3bp_Ele9	Yes	Yes	PNA	Class I	DNA	MITE	Agam_m3bp_Ele9#MITEs/m3bp	-	TELREP_AG#Unknown	TIR	38	-
Acol_m4bp_Ele1	Yes	Yes	PNA	Class I	DNA	MITE	Agam_m4bp_Ele1#MITEs/m4bp	PiggyBacN1_AG|Remnant|TIR|piler-ag-5-40-90-90_Clu-14	-	TIR	21	-
Acol_m4bp_Ele2	Yes	Yes	PNA	Class I	DNA	MITE	Amel_m4bp_Ele2#MITEs/m4bp	-	-	TIR	14	-
Acol_m4bp_Ele3	Yes	Yes	PNA	Class I	DNA	MITE	Agam_m4bp_Ele3#MITEs/m4bp	Novel|MITE-like|TIR|piler-ag-5-40-90-90_Clu-43	-	TIR	18	-
Acol_m4bp_Ele4	Yes	Yes	PNA	Class I	DNA	MITE	Aara_m4bp_Ele4#MITEs/m4bp	PiggyBac1_AG|Fragment|TIR|piler-ag-5-40-90-90_Clu-69	-	TIR	18	-
Acol_m8bp_Ele11	Yes	Yes	PNA	Class I	DNA	MITE	Amel_m8bp_Ele11#MITEs/m8bp	-	AgaP12MITE205B#DNA/P	TIR	29	-
Acol_m8bp_Ele12	Yes	Yes	PNA	Class I	DNA	MITE	Agam_m8bp_Ele12#MITEs/m8bp	AgaP13MITE412|MITE|TIR|piler-ag-5-40-90-90_Clu-37	AgaP13MITE412#DNA/P	TIR	27	-
Acol_m8bp_Ele13	Yes	No	PNA	Class I	DNA	MITE	Aara_m8bp_Ele13#MITEs/m8bp	-	-	TIR	14	-
Acol_m8bp_Ele2	Yes	Yes	PNA	Class I	DNA	MITE	Aara_m8bp_Ele2#MITEs/m8bp	AgaP4MITE559(NCBI)|MITE|TIR|piler-ag-5-40-90-90_Clu-28	AgaP4MITE559#DNA/P	TIR	27	-
Acol_m8bp_Ele3	Yes	Yes	PNA	Class I	DNA	MITE	Agam_m8bp_Ele3#MITEs/m8bp	-	-	TIR	10	-
Acol_m8bp_Ele4	Yes	No	DG	Class I	DNA	MITE	Agam_m8bp_Ele4#MITEs/m8bp	-	-	Missing	0	-
Acol_m8bp_Ele5	Yes	Yes	PNA	Class I	DNA	MITE	Aqua_m8bp_Ele5#MITEs/m8bp	-	AgaP2-P12MITE326#DNA/P	TIR	28	-
Acol_m8bp_Ele6	Yes	Yes	PNA	Class I	DNA	MITE	Amel_m8bp_Ele6#MITEs/m8bp	Novel|MITE-like|TIR|piler-ag-5-40-90-90_Clu-25	-	TIR	18	-
Acol_m8bp_Ele7	Yes	No	PNA	Class I	DNA	MITE	Agam_m8bp_Ele7#MITEs/m8bp	-	HATN6_AG#DNA/hAT-Charlie	TIR	36	-
Acol_m8bp_Ele8	Yes	Yes	PNA	Class I	DNA	MITE	Agam_m8bp_Ele8#MITEs/m8bp	PEGASUS|NA|TIR|piler-ag-5-40-90-90_Clu-68	-	TIR	17	-
Acol_Maque_Ele1	Yes	Yes	PNA	Undetermined	Undetermined	Maque	-	-	-	NA	-	-
Acol_mar_Ele13	Yes	No	PA	Class I	DNA	Tc1-Mariner	Agam_mar_Ele13#DNA/mariner	-	-	TIR	22	rve superfamily
Acol_mar_Ele14	Yes	Yes	PA*	Class I	DNA	Tc1-Mariner	Agam_mar_Ele14#DNA/mariner	-	-	Missing	0	HTH_48 superfamily
Acol_mar_Ele15	Yes	Yes	PA	Class I	DNA	Tc1-Mariner	Agam_mar_Ele15#DNA/mariner	Marina|MITE-like|TIR|piler-ag-5-40-90-90_Clu-21	MARINA#DNA/TcMar-Mariner	TIR	33	rve superfamily, HTH_48 superfamily
Acol_mar_Ele17	Yes	Yes	PA	Class I	DNA	Tc1-Mariner	Agam_mar_Ele17#DNA/mariner	-	-	TIR	33	HTH_48 superfamily, rve superfamily
Acol_mar_Ele19	Yes	Yes	PA	Class I	DNA	Tc1-Mariner	Agam_mar_Ele19#DNA/mariner	-	-	TIR	12	rve superfamily
Acol_mar_Ele23	Yes	Yes	PA	Class I	DNA	Tc1-Mariner	Agam_mar_Ele23#DNA/mariner	-	-	TIR	33	rve superfamily, rve superfamily
Acol_mar_Ele25	Yes	No	PA*	Class I	DNA	Tc1-Mariner	Agam_mar_Ele25#DNA/mariner	-	-	Missing	0	rve superfamily, HTH_48 superfamily
Acol_mar_Ele26	Yes	Yes	DG	Class I	DNA	Tc1-Mariner	Agam_mar_Ele26#DNA/mariner	-	-	Missing	0
Acol_mar_Ele29	Yes	Yes	PA	Class I	DNA	Tc1-Mariner	Agam_mar_Ele29#DNA/mariner	-	-	TIR	26	HTH superfamily
Acol_mar_Ele30	Yes	Yes	PA*	Class I	DNA	Tc1-Mariner	Agam_mar_Ele30#DNA/mariner	Mariner_ELE26/27/28/29/30/31(family2)|Fragment|TIR|piler-ag-5-40-90-90_Clu-192	-	Missing	0	rve superfamily
Acol_mar_Ele4	Yes	No	PNA	Class I	DNA	Tc1-Mariner	Agam_mar_Ele4#DNA/mariner	-	-	TIR	29
Acol_mTA_Ele1	Yes	Yes	PNA	Class I	DNA	MITE	Agam_mTA_Ele1#MITEs/mTA	-	MarinerN9_AG#DNA/TcMar-Tc1	TIR	15	-
Acol_mTA_Ele10	Yes	Yes	PNA	Class I	DNA	MITE	Amel_mTA_Ele10#MITEs/mTA	GAMBOL_ELE3|MITE-like|TIR|piler-ag-5-40-90-90_Clu-85	Mariner-N18_AG#DNA/TcMar?	TIR	156	-
Acol_mTA_Ele11	Yes	No	PNA	Class I	DNA	MITE	Aara_mTA_Ele11#MITEs/mTA	-	Mariner-N14_AG#DNA/TcMar-ISRm11	TIR	111	-
Acol_mTA_Ele12	Yes	Yes	PNA	Class I	DNA	MITE	Aara_mTA_Ele12#MITEs/mTA	-	DNA-5_AG#DNA/TcMar-Tigger	TIR	27	-
Acol_mTA_Ele13	Yes	Yes	PNA	Class I	DNA	MITE	Agam_mTA_Ele13#MITEs/mTA	-	-	TIR	22	-
Acol_mTA_Ele14	Yes	No	PNA	Class I	DNA	MITE	Agam_mTA_Ele14#MITEs/mTA	-	Mariner-N15_AG#DNA/TcMar-ISRm11	TIR	110	-
Acol_mTA_Ele15	Yes	Yes	PNA	Class I	DNA	MITE	Agam_mTA_Ele15#MITEs/mTA	-	-	TIR	24	-
Acol_mTA_Ele16	Yes	No	PNA	Class I	DNA	MITE	Agam_mTA_Ele16#MITEs/mTA	Novel|MITE-like|TIR|piler-ag-5-40-90-90_Clu-52	-	TIR	63	-
Acol_mTA_Ele17	Yes	Yes	PNA	Class I	DNA	MITE	Aara_mTA_Ele17#MITEs/mTA	MARINERN2_AG|NA|TIR|piler-ag-5-40-90-90_Clu-26	MarinerN2_AG#DNA/TcMar-Tc1	TIR	15	-
Acol_mTA_Ele19	Yes	Yes	PNA	Class I	DNA	MITE	Aqua_mTA_Ele19#MITEs/mTA	-	-	TIR	10	-
Acol_mTA_Ele20	Yes	Yes	PNA	Class I	DNA	MITE	Aqua_mTA_Ele20#MITEs/mTA	-	-	TIR	24	-
Acol_mTA_Ele21	Yes	Yes	PNA	Class I	DNA	MITE	Aqua_mTA_Ele21#MITEs/mTA	-	MarinerN3_AG#DNA/TcMar-Tigger	TIR	25	-
Acol_mTA_Ele23	Yes	Yes	PNA	Class I	DNA	MITE	Agam_mTA_Ele23#MITEs/mTA	Novel|MITE-like|TIR|piler-ag-5-40-90-90_Clu-15	Clu-15_AG#DNA	TIR	142	-
Acol_mTA_Ele24	Yes	No	PNA	Class I	DNA	MITE	Amer_mTA_Ele24#MITEs/mTA	-	-	TIR	25	-
Acol_mTA_Ele27	Yes	Yes	PNA	Class I	DNA	MITE	Aara_mTA_Ele27#MITEs/mTA	Novel|MITE-like|TIR|piler-ag-5-40-90-90_Clu-97	Mariner-N17_AG#DNA/TcMar-ISRm11	TIR	172	-
Acol_mTA_Ele28	New	Yes	PNA	Class I	DNA	MITE	-	-	-	TIR	13	-
Acol_mTA_Ele29	Yes	Yes	PNA	Class I	DNA	MITE	-	HELITRON2_AG|Remnant|TIR|piler-ag-5-40-90-90_Clu-156	-	TIR	13	-
Acol_mTA_Ele3	Yes	Yes	PNA	Class I	DNA	MITE	Aara_mTA_Ele3#MITEs/mTA	GAMBOL_ELE5|MITE-like|TIR|piler-ag-5-40-90-90_Clu-95	TC1N-1_AG#DNA/TcMar-Tc1	TIR	189	-
Acol_mTA_Ele30	New	Yes	PNA	Class I	DNA	MITE	-	-	-	TIR	24	-
Acol_mTA_Ele31	Yes	Yes	PNA	Class I	DNA	MITE	-	-	DNA-3_AG#DNA/TcMar-Tigger	TIR	26	-
Acol_mTA_Ele5	Yes	Yes	PNA	Class I	DNA	MITE	Agam_mTA_Ele5#MITEs/mTA	IKIRARA1_AG|NA|TIR|piler-ag-5-40-90-90_Clu-71	IKIRARA1#DNA	TIR	297	-
Acol_mTA_Ele6	Yes	Yes	PNA	Class I	DNA	MITE	Agam_mTA_Ele6#MITEs/mTA	MARINERN13_AG|NA|TIR|piler-ag-5-40-90-90_Clu-10	MarinerN13_AG#DNA/TcMar-Tc1?	TIR	14	-
Acol_mTA_Ele7	Yes	No	PNA	Class I	DNA	MITE	Aqua_mTA_Ele7#MITEs/mTA	-	-	TIR	69	-
Acol_mTA_Ele9	Yes	Yes	PNA	Class I	DNA	MITE	Aara_mTA_Ele9#MITEs/mTA	MARINERN7_AG|NA|TIR|piler-ag-5-40-90-90_Clu-141	MarinerN7_AG#DNA/TcMar-Tigger	TIR	25	-
Acol_otherMITEs_Eles1	Yes	Yes	PNA	Class I	DNA	MITE	Amer_Ty3_Gypsy_Ele18#LTR/Ty3_gypsy	|Remnant|NLTR|piler-ag-5-40-90-90_Clu-184	Clu-240_AG#DNA	TIR	22	-
Acol_otherMITEs_Eles10	Yes	Yes	PNA	Class I	DNA	MITE	-	Novel|MITE-like|TIR|piler-ag-5-40-90-90_Clu-137	Clu-137_AG#DNA	TIR	10	-
Acol_otherMITEs_Eles101	Yes	Yes	PNA	Class I	DNA	MITE	Agam_otherMITEs_Ele101#MITEs/otherMITEs	-	-	TIR	12	-
Acol_otherMITEs_Eles11	Yes	Yes	PNA	Class I	DNA	MITE	-	Novel|MITE-like|TIR|piler-ag-5-40-90-90_Clu-144	-	TIR	10	-
Acol_otherMITEs_Eles12	Yes	Yes	PNA	Class I	DNA	MITE	-	Novel|MITE-like|TIR|piler-ag-5-40-90-90_Clu-166	Clu-166_AG#DNA/TcMar-Tc1	TIR	236	-
Acol_otherMITEs_Eles13	Yes	Yes	PNA	Class I	DNA	MITE	-	Novel|MITE-like|TIR|piler-ag-5-40-90-90_Clu-168	Clu-168_AG#DNA/TcMar-Tc1	TIR	28	-
Acol_otherMITEs_Eles14	Yes	Yes	PNA	Class I	DNA	MITE	-	-	DNA-2_AG#DNA	TIR	12	-
Acol_otherMITEs_Eles15	New	Yes	PNA	Class I	DNA	MITE	-	-	-	TIR	34	-
Acol_otherMITEs_Eles16	New	Yes	PNA	Class I	DNA	MITE	-	-	-	TIR	14	-
Acol_otherMITEs_Eles17	New	Yes	PNA	Class I	DNA	MITE	-	-	-	TIR	14	-
Acol_otherMITEs_Eles18	New	Yes	PNA	Class I	DNA	MITE	-	-	-	TIR	34	-
Acol_otherMITEs_Eles19	New	Yes	PNA	Class I	DNA	MITE	-	-	-	TIR	13	-
Acol_otherMITEs_Eles2	New	Yes	PNA	Class I	DNA	MITE	-	-	-	TIR	183	-
Acol_otherMITEs_Eles20	New	Yes	PNA	Class I	DNA	MITE	-	-	-	TIR	14	-
Acol_otherMITEs_Eles21	Yes	Yes	PNA	Class I	DNA	MITE	-	Novel|MITE-like|TIR|piler-ag-5-40-90-90_Clu-48	-	TIR	11	-
Acol_otherMITEs_Eles22	New	Yes	PNA	Class I	DNA	MITE	-	-	-	TIR	13	-
Acol_otherMITEs_Eles23	New	Yes	PNA	Class I	DNA	MITE	-	-	-	TIR	19	-
Acol_otherMITEs_Eles24	New	Yes	PNA	Class I	DNA	MITE	-	-	-	TIR	107	-
Acol_otherMITEs_Eles25	Yes	Yes	PNA	Class I	DNA	MITE	-	Novel|MITE-like|TIR|piler-ag-5-40-90-90_Clu-12	Clu-12_AG#DNA	TIR	37	-
Acol_otherMITEs_Eles26	Yes	Yes	PNA	Class I	DNA	MITE	-	Novel|MITE-like|TIR|piler-ag-5-40-90-90_Clu-111	Clu-111_AG#DNA	TIR	206	-
Acol_otherMITEs_Eles27	New	Yes	PNA	Class I	DNA	MITE	-	-	-	TIR	10	-
Acol_otherMITEs_Eles28	Yes	Yes	PNA	Class I	DNA	MITE	-	Novel|MITE-like|TIR|piler-ag-5-40-90-90_Clu-151	-	TIR	19	-
Acol_otherMITEs_Eles29	New	Yes	PNA	Class I	DNA	MITE	-	-	-	TIR	248	-
Acol_otherMITEs_Eles3	Yes	Yes	PNA	Class I	DNA	MITE	-	Novel|MITE-like|TIR|piler-ag-5-40-90-90_Clu-39	Clu-39_AG#DNA	TIR	27	-
Acol_otherMITEs_Eles30	Yes	Yes	DG	Class II	LINE	-	-	|Remnant|NLTR|piler-ag-5-40-90-90_Clu-203	-	NA	-	-
Acol_otherMITEs_Eles4	Yes	Yes	PNA	Class I	DNA	MITE	-	-	Clu-39B_AG#DNA	TIR	27	-
Acol_otherMITEs_Eles5	Yes	Yes	PNA	Class I	DNA	MITE	-	-	Clu-47_AG#DNA	TIR	26	-
Acol_otherMITEs_Eles6	Yes	Yes	PNA	Class I	DNA	MITE	-	Novel|MITE-like|TIR|piler-ag-5-40-90-90_Clu-61	Clu-47B_AG#DNA	TIR	32	-
Acol_otherMITEs_Eles7	Yes	Yes	PNA	Class I	DNA	MITE	-	Novel|MITE-like|TIR|piler-ag-5-40-90-90_Clu-75	Clu-47C_AG#DNA	TIR	63	-
Acol_otherMITEs_Eles8	Yes	Yes	PNA	Class I	DNA	MITE	-	Novel|MITE-like|TIR|piler-ag-5-40-90-90_Clu-121	Clu-87A_AG#DNA	TIR	31	-
Acol_otherMITEs_Eles9	New	Yes	PNA	Class I	DNA	MITE	-	-	-	TIR	31	-
Acol_Outcast_Ele1	Yes	Yes	PA	Class II	LINE	Outcast	Aara_AR_Outcast_Ele1#LINE/Outcast	-	-	NA	-	RT_like superfamily, RVT_1 superfamily, EEP superfamily, group_II_RT_mat superfamily
Acol_Outcast_Ele2	Yes	Yes	DG	Class II	LINE	Outcast	Agam_Outcast_Ele2#LINE/Outcast	-	Ag-Outcast-2#LINE/I-Jockey	NA	-
Acol_Outcast_Ele4	Yes	Yes	PA	Class II	LINE	Outcast	Aara_AR_Outcast_Ele4#LINE/Outcast	-	-	NA	-	RT_like superfamily, RNase_H_like superfamily, EEP superfamily, RVT_1 superfamily, group_II_RT_mat superfamily
Acol_Outcast_Ele5	Yes	No	PA	Class II	LINE	Outcast	Agam_Outcast_Ele5#LINE/Outcast	OUTCAST_ELE5|Full|NLTR|piler-ag-5-40-90-90_Clu-237	Ag-Outcast-5#LINE/I-Jockey	NA	-	RT_like superfamily, RVT_1 superfamily, RNase_H_like superfamily, EEP superfamily
Acol_Outcast_Ele6	Yes	Yes	PA	Class II	LINE	Outcast	Agam_Outcast_Ele6#LINE/Outcast	OUTCAST_ELE6|Full|NLTR|piler-ag-5-40-90-90_Clu-188	Ag-Outcast-6#LINE/I-Jockey	NA	-	EEP superfamily, RT_like superfamily, RVT_1 superfamily
Acol_Outcast_Ele7	New	Yes	PA	Class II	LINE	Outcast	-	-	-	NA	-	RT_like superfamily, EEP superfamily, RVT_1 superfamily, RNase_H_like superfamily
Acol_Outcast_Ele8	New	Yes	PA	Class II	LINE	Outcast	-	-	-	NA	-	RT_like superfamily, RNase_H_like superfamily, RVT_1 superfamily, group_II_RT_mat superfamily
Acol_Outcast_Ele9	New	Yes	DG	Class II	LINE	Outcast	-	-	-	NA	-	RVT_1 superfamily
Acol_P_Ele1	Yes	No	PA*	Class I	DNA	P	Agam_P_Ele1#DNA/P	-	P1_AG#DNA/P	Missing	0	THAP superfamily, Tnp_P_element_C superfamily, Tnp_P_element superfamily
Acol_P_Ele10	Yes	Yes	PA	Class I	DNA	P	-	P3_AG|FULL|TIR|piler-ag-5-40-90-90_Clu-161	P3_AG#DNA/P	TIR	29	Tnp_P_element_C superfamily, THAP superfamily, Tnp_P_element superfamily
Acol_P_Ele11	Yes	Yes	DG	Class I	DNA	P	-	-	AgaP8MITE2450#DNA/P	TIR	32
Acol_P_Ele12	New	Yes	DG	Class I	DNA	P	-	-	-	TIR	32
Acol_P_Ele13	Yes	Yes	PA*	Class I	DNA	P	-	-	P4_AG#DNA/P	Missing	0	Tnp_P_element superfamily, Tnp_P_element_C superfamily
Acol_P_Ele14	Yes	Yes	DG	Class I	DNA	P	-	AgaP12MITE205B|MITE|TIR|piler-ag-5-40-90-90_Clu-9	-	TIR	23
Acol_P_Ele2	Yes	Yes	DG	Class I	DNA	P	-	AgaP4MITE675|MITE|TIR|piler-ag-5-40-90-90_Clu-123	AgaP4MITE675#DNA/P	TIR	11
Acol_P_Ele3	Yes	Yes	DG	Class I	DNA	P	-	AgaP4MITE675|MITE|TIR|piler-ag-5-40-90-90_Clu-91	-	TIR	25
Acol_P_Ele4	Yes	Yes	DG	Class I	DNA	P	-	-	AgaP8#DNA/P	TIR	15
Acol_P_Ele5	Yes	Yes	DG	Class I	DNA	P	-	AgaP8|Fragment|TIR|piler-ag-5-40-90-90_Clu-214	-	TIR	18
Acol_P_Ele6	Yes	Yes	DG	Class I	DNA	P	-	-	AgaP13MITE592#DNA/P	TIR	31
Acol_P_Ele7	Yes	Yes	PA	Class I	DNA	P	-	-	AgaP15#DNA/P	TIR	31	Tnp_P_element_C superfamily, Tnp_P_element superfamily
Acol_P_Ele8	Yes	Yes	PA	Class I	DNA	P	-	-	P2_AG#DNA/P	TIR	26	Tnp_P_element_C superfamily, Tnp_P_element superfamily, ZapB superfamily
Acol_P_Ele9	Yes	Yes	PA	Class I	DNA	P	-	-	AgaP12#DNA/P	TIR	35	THAP superfamily, Tnp_P_element_C superfamily
Acol_Pao_Bel_Ele10	Yes	Yes	PA*	Class II	LTR	Bel-Pao	Agam_Pao_Bel_Ele10#LTR/Pao_Bel	-	-	Missing	0	RT_like superfamily, Peptidase_A17 superfamily, DUF5641 superfamily, DUF1759 superfamily, pepsin_retropepsin_like superfamily, Integrase_H2C2 superfamily, rve superfamily
Acol_Pao_Bel_Ele11	Yes	Yes	PA	Class II	LTR	Bel-Pao	Agam_Pao_Bel_Ele11#LTR/Pao_Bel	-	BEL9-I_AG#LTR/Pao	LTR	264	RT_like superfamily, Peptidase_A17 superfamily, DUF1759 superfamily, DUF5641 superfamily, pepsin_retropepsin_like superfamily, rve superfamily, Integrase_H2C2 superfamily
Acol_Pao_Bel_Ele12	Yes	No	DG	Class II	LTR	Bel-Pao	Agam_Pao_Bel_Ele12#LTR/Pao_Bel	-	-	LTR	233	Peptidase_A17 superfamily, DUF1759 superfamily, rve superfamily, Integrase_H2C2 superfamily, zf-H2C2 superfamily
Acol_Pao_Bel_Ele13	Yes	Yes	PA	Class II	LTR	Bel-Pao	Agam_Pao_Bel_Ele13#LTR/Pao_Bel	-	BEL-22_AG-I#LTR/Pao	LTR	321	RT_like superfamily, Peptidase_A17 superfamily, DUF5641 superfamily, DUF1759 superfamily, Integrase_H2C2 superfamily, pepsin_retropepsin_like superfamily, rve superfamily
Acol_Pao_Bel_Ele14	Yes	No	PA	Class II	LTR	Bel-Pao	Agam_Pao_Bel_Ele14#LTR/Pao_Bel	-	RETRO5_AG_LTR#LTR	LTR	222	RT_like superfamily, Peptidase_A17 superfamily, DUF1759 superfamily, DUF5641 superfamily, pepsin_retropepsin_like superfamily, Integrase_H2C2 superfamily, rve superfamily, RVT_1 superfamily, zf-H2C2 superfamily
Acol_Pao_Bel_Ele15	Yes	Yes	PA	Class II	LTR	Bel-Pao	Agam_Pao_Bel_Ele15#LTR/Pao_Bel	-	-	LTR	153	RT_like superfamily, Peptidase_A17 superfamily, DUF5641 superfamily, DUF1759 superfamily, pepsin_retropepsin_like superfamily, rve superfamily, Integrase_H2C2 superfamily, RNase_H_like superfamily
Acol_Pao_Bel_Ele16	Yes	No	PA	Class II	LTR	Bel-Pao	Agam_Pao_Bel_Ele16#LTR/Pao_Bel	-	-	LTR	290	RT_like superfamily, Peptidase_A17 superfamily, DUF5641 superfamily, rve superfamily, Integrase_H2C2 superfamily, pepsin_retropepsin_like superfamily, RVT_1 superfamily, DUF1759 superfamily
Acol_Pao_Bel_Ele17	Yes	No	PA	Class II	LTR	Bel-Pao	Agam_Pao_Bel_Ele17#LTR/Pao_Bel	-	-	LTR	453	DUF1759 superfamily, DUF2583 superfamily, RT_like superfamily, Peptidase_A17 superfamily, DUF5641 superfamily, pepsin_retropepsin_like superfamily, rve superfamily, Integrase_H2C2 superfamily
Acol_Pao_Bel_Ele18	Yes	Yes	DG	Class II	LTR	Bel-Pao	Agam_Pao_Bel_Ele18#LTR/Pao_Bel	P4_AG|Remnant|TIR|piler-ag-5-40-90-90_Clu-64	-	LTR	486	RT_like superfamily, Peptidase_A17 superfamily, DUF1759 superfamily, PHD_SF superfamily, TPR_MLP1_2 superfamily, Cortex-I_coil superfamily, DUF4200 superfamily, ATP-synt_Fo_b superfamily, Tropomyosin_1 superfamily
Acol_Pao_Bel_Ele19	Yes	Yes	PA	Class II	LTR	Bel-Pao	Agam_Pao_Bel_Ele19#LTR/Pao_Bel	-	BEL-24_AG-I#LTR/Pao	LTR	391	RT_like superfamily, Peptidase_A17 superfamily, DUF5641 superfamily, DUF1759 superfamily, pepsin_retropepsin_like superfamily, Integrase_H2C2 superfamily, rve superfamily, RNase_H_like superfamily
Acol_Pao_Bel_Ele2	Yes	Yes	PA*	Class II	LTR	Bel-Pao	Agam_Pao_Bel_Ele2#LTR/Pao_Bel	-	-	Missing	0	RT_like superfamily, Peptidase_A17 superfamily, DUF5641 superfamily, DUF1759 superfamily, rve superfamily, Integrase_H2C2 superfamily
Acol_Pao_Bel_Ele20	Yes	No	DG	Class II	LTR	Bel-Pao	Agam_Pao_Bel_Ele20#LTR/Pao_Bel	-	-	LTR	467	Peptidase_A17 superfamily, RT_like superfamily, DUF5641 superfamily, DUF1759 superfamily, pepsin_retropepsin_like superfamily, RNase_H_like superfamily
Acol_Pao_Bel_Ele21	Yes	Yes	PA	Class II	LTR	Bel-Pao	Agam_Pao_Bel_Ele21#LTR/Pao_Bel	-	-	LTR	289	Peptidase_A17 superfamily, RT_like superfamily, DUF5641 superfamily, DUF1759 superfamily, rve superfamily, pepsin_retropepsin_like superfamily
Acol_Pao_Bel_Ele22	Yes	No	PA	Class II	LTR	Bel-Pao	Agam_Pao_Bel_Ele22#LTR/Pao_Bel	-	RETRO1_AG_LTR#LTR/Pao	LTR	301	RT_like superfamily, Peptidase_A17 superfamily, DUF5641 superfamily, DUF1759 superfamily, RNase_H_like superfamily, Integrase_H2C2 superfamily, pepsin_retropepsin_like superfamily
Acol_Pao_Bel_Ele23	Yes	No	PA	Class II	LTR	Bel-Pao	Agam_Pao_Bel_Ele23#LTR/Pao_Bel	-	-	LTR	373	RT_like superfamily, Peptidase_A17 superfamily, DUF5641 superfamily, pepsin_retropepsin_like superfamily, rve superfamily, Integrase_H2C2 superfamily, DUF1759 superfamily
Acol_Pao_Bel_Ele24	Yes	Yes	PA	Class II	LTR	Bel-Pao	Agam_Pao_Bel_Ele24#LTR/Pao_Bel	-	RETRO76_AG_LTR#LTR/Pao	LTR	458	RT_like superfamily, Peptidase_A17 superfamily, DUF5641 superfamily, PHD_SF superfamily, DUF1759 superfamily, RNase_H_like superfamily, Integrase_H2C2 superfamily
Acol_Pao_Bel_Ele25	Yes	Yes	PA	Class II	LTR	Bel-Pao	Agam_Pao_Bel_Ele25#LTR/Pao_Bel	-	BEL-73_CQ-I#LTR/Pao	LTR	269	RT_like superfamily, Peptidase_A17 superfamily, DUF5641 superfamily, DUF1759 superfamily, pepsin_retropepsin_like superfamily, rve superfamily, Integrase_H2C2 superfamily, zf-H2C2 superfamily
Acol_Pao_Bel_Ele26	Yes	Yes	PA	Class II	LTR	Bel-Pao	Agam_Pao_Bel_Ele26#LTR/Pao_Bel	-	-	LTR	279	Peptidase_A17 superfamily, RT_like superfamily, DUF5641 superfamily, DUF1759 superfamily
Acol_Pao_Bel_Ele27	Yes	Yes	PA	Class II	LTR	Bel-Pao	Agam_Pao_Bel_Ele27#LTR/Pao_Bel	-	RETRO932_AG_LTR#LTR/Pao	LTR	199	RT_like superfamily, Peptidase_A17 superfamily, DUF1759 superfamily, DUF5641 superfamily, pepsin_retropepsin_like superfamily, rve superfamily, RVT_1 superfamily, Integrase_H2C2 superfamily
Acol_Pao_Bel_Ele28	Yes	Yes	PA	Class II	LTR	Bel-Pao	Agam_Pao_Bel_Ele28#LTR/Pao_Bel	-	-	LTR	291	RT_like superfamily, Peptidase_A17 superfamily, DUF5641 superfamily, DUF1759 superfamily, rve superfamily, pepsin_retropepsin_like superfamily, Integrase_H2C2 superfamily
Acol_Pao_Bel_Ele29	Yes	No	PA	Class II	LTR	Bel-Pao	Agam_Pao_Bel_Ele29#LTR/Pao_Bel	-	RETRO33_AG_LTR#LTR/Pao	LTR	480	RT_like superfamily, Peptidase_A17 superfamily, DUF5641 superfamily, DUF1759 superfamily, pepsin_retropepsin_like superfamily, rve superfamily, Integrase_H2C2 superfamily, RNase_H_like superfamily
Acol_Pao_Bel_Ele3	Yes	Yes	PA	Class II	LTR	Bel-Pao	Agam_Pao_Bel_Ele3#LTR/Pao_Bel	-	-	LTR	379	RT_like superfamily, Peptidase_A17 superfamily, DUF5641 superfamily, DUF1759 superfamily, pepsin_retropepsin_like superfamily, rve superfamily, Integrase_H2C2 superfamily
Acol_Pao_Bel_Ele30	Yes	Yes	PA	Class II	LTR	Bel-Pao	Agam_Pao_Bel_Ele30#LTR/Pao_Bel	-	-	LTR	273	Peptidase_A17 superfamily, RT_like superfamily, DUF5641 superfamily, DUF1759 superfamily, RVT_1 superfamily, rve superfamily
Acol_Pao_Bel_Ele31	Yes	Yes	PA	Class II	LTR	Bel-Pao	Agam_Pao_Bel_Ele31#LTR/Pao_Bel	-	-	LTR	242	Peptidase_A17 superfamily, RT_like superfamily, DUF1759 superfamily, DUF5641 superfamily, pepsin_retropepsin_like superfamily, rve superfamily, Integrase_H2C2 superfamily
Acol_Pao_Bel_Ele32	Yes	Yes	PA	Class II	LTR	Bel-Pao	Agam_Pao_Bel_Ele32#LTR/Pao_Bel	-	BEL15-I_AG#LTR/Pao	LTR	275	RT_like superfamily, Peptidase_A17 superfamily, DUF5641 superfamily, DUF1759 superfamily, pepsin_retropepsin_like superfamily, rve superfamily
Acol_Pao_Bel_Ele33	Yes	Yes	PA	Class II	LTR	Bel-Pao	Agam_Pao_Bel_Ele33#LTR/Pao_Bel	-	-	LTR	372	RT_like superfamily, Peptidase_A17 superfamily, DUF5641 superfamily, PHD_SF superfamily, rve superfamily, DUF1759 superfamily, Integrase_H2C2 superfamily, RNase_H_like superfamily
Acol_Pao_Bel_Ele34	Yes	No	PA	Class II	LTR	Bel-Pao	Agam_Pao_Bel_Ele34#LTR/Pao_Bel	-	-	LTR	407	RT_like superfamily, Peptidase_A17 superfamily, DUF5641 superfamily, rve superfamily, Integrase_H2C2 superfamily, RNase_H_like superfamily, PHD_SF superfamily, ClassIIa_HDAC_Gln-rich-N superfamily, DUF1759 superfamily
Acol_Pao_Bel_Ele35	Yes	Yes	PA	Class II	LTR	Bel-Pao	Agam_Pao_Bel_Ele35#LTR/Pao_Bel	-	-	LTR	369	DUF1759 superfamily, pepsin_retropepsin_like superfamily, DUF5641 superfamily, RT_like superfamily, Peptidase_A17 superfamily, Integrase_H2C2 superfamily
Acol_Pao_Bel_Ele37	Yes	Yes	PA	Class II	LTR	Bel-Pao	Agam_Pao_Bel_Ele37#LTR/Pao_Bel	BEL6_AG|Full|LTR|piler-ag-5-40-90-90_Clu-98	BEL6-I_AG#LTR/Pao	LTR	489	RT_like superfamily, Peptidase_A17 superfamily, DUF5641 superfamily, DUF1759 superfamily, pepsin_retropepsin_like superfamily, rve superfamily, Integrase_H2C2 superfamily
Acol_Pao_Bel_Ele38	Yes	Yes	PA	Class II	LTR	Bel-Pao	Agam_Pao_Bel_Ele38#LTR/Pao_Bel	-	BEL-23_AG-I#LTR/Pao	LTR	390	RT_like superfamily, Peptidase_A17 superfamily, DUF5641 superfamily, PHD_SF superfamily, DUF1759 superfamily, PHD_SF superfamily, RNase_H_like superfamily
Acol_Pao_Bel_Ele39	Yes	No	PA	Class II	LTR	Bel-Pao	Agam_Pao_Bel_Ele39#LTR/Pao_Bel	-	-	LTR	377	RT_like superfamily, Peptidase_A17 superfamily, DUF5641 superfamily, Integrase_H2C2 superfamily, rve superfamily, RNase_H_like superfamily, SPRR2 superfamily, DUF1759 superfamily, PMG superfamily
Acol_Pao_Bel_Ele4	Yes	No	PA	Class II	LTR	Bel-Pao	Agam_Pao_Bel_Ele4#LTR/Pao_Bel	-	-	LTR	197	RT_like superfamily, Peptidase_A17 superfamily, DUF5641 superfamily, DUF1759 superfamily, pepsin_retropepsin_like superfamily, Integrase_H2C2 superfamily, rve superfamily, RNase_H_like superfamily
Acol_Pao_Bel_Ele40	Yes	No	PA	Class II	LTR	Bel-Pao	Agam_Pao_Bel_Ele40#LTR/Pao_Bel	-	-	LTR	180	RT_like superfamily, Peptidase_A17 superfamily, DUF5641 superfamily, rve superfamily, Integrase_H2C2 superfamily, RVT_1 superfamily
Acol_Pao_Bel_Ele41	Yes	No	PA	Class II	LTR	Bel-Pao	Agam_Pao_Bel_Ele41#LTR/Pao_Bel	-	-	LTR	319	RT_like superfamily, Peptidase_A17 superfamily, DUF5641 superfamily, RNase_H_like superfamily, DUF1759 superfamily, PHD_SF superfamily, LIM superfamily
Acol_Pao_Bel_Ele42	Yes	Yes	PA	Class II	LTR	Bel-Pao	Agam_Pao_Bel_Ele42#LTR/Pao_Bel	-	-	LTR	291	RT_like superfamily, Peptidase_A17 superfamily, DUF5641 superfamily, DUF1759 superfamily, rve superfamily, pepsin_retropepsin_like superfamily, Integrase_H2C2 superfamily
Acol_Pao_Bel_Ele43	Yes	Yes	DG	Class II	LTR	Bel-Pao	Agam_Pao_Bel_Ele43#LTR/Pao_Bel	-	-	LTR	462	Peptidase_A17 superfamily, DUF5641 superfamily, DUF1759 superfamily
Acol_Pao_Bel_Ele44	Yes	Yes	PA	Class II	LTR	Bel-Pao	Agam_Pao_Bel_Ele44#LTR/Pao_Bel	-	-	LTR	377	RT_like superfamily, Peptidase_A17 superfamily, DUF5641 superfamily, DUF1759 superfamily, PHD_SF superfamily, rve superfamily
Acol_Pao_Bel_Ele45	Yes	Yes	PA	Class II	LTR	Bel-Pao	Agam_Pao_Bel_Ele45#LTR/Pao_Bel	-	-	LTR	512	RT_like superfamily, Peptidase_A17 superfamily, DUF1759 superfamily, pepsin_retropepsin_like superfamily, rve superfamily, Integrase_H2C2 superfamily
Acol_Pao_Bel_Ele46	Yes	No	PA	Class II	LTR	Bel-Pao	Agam_Pao_Bel_Ele46#LTR/Pao_Bel	-	RETRO931_AG_LTR#LTR/Pao	LTR	206	RT_like superfamily, Peptidase_A17 superfamily, DUF1759 superfamily, DUF5641 superfamily, pepsin_retropepsin_like superfamily, rve superfamily, Integrase_H2C2 superfamily
Acol_Pao_Bel_Ele47	Yes	No	PA	Class II	LTR	Bel-Pao	Agam_Pao_Bel_Ele47#LTR/Pao_Bel	-	-	LTR	172	Peptidase_A17 superfamily, RT_like superfamily, DUF5641 superfamily, DUF1759 superfamily, Integrase_H2C2 superfamily, Amelogenin superfamily
Acol_Pao_Bel_Ele48	Yes	Yes	DG	Class II	LTR	Bel-Pao	Agam_Pao_Bel_Ele48#LTR/Pao_Bel	-	-	Missing	0	RT_like superfamily, Peptidase_A17 superfamily, rve superfamily
Acol_Pao_Bel_Ele49	Yes	Yes	PA	Class II	LTR	Bel-Pao	Agam_Pao_Bel_Ele49#LTR/Pao_Bel	-	RETRO933_AG_LTR#LTR/Pao	LTR	343	Peptidase_A17 superfamily, RT_like superfamily, DUF5641 superfamily, DUF1759 superfamily, Integrase_H2C2 superfamily, pepsin_retropepsin_like superfamily
Acol_Pao_Bel_Ele5	Yes	Yes	PA	Class II	LTR	Bel-Pao	Agam_Pao_Bel_Ele5#LTR/Pao_Bel	-	BEL-26_AG-I#LTR/Pao	LTR	182	RT_like superfamily, Peptidase_A17 superfamily, DUF5641 superfamily, DUF1759 superfamily, pepsin_retropepsin_like superfamily, rve superfamily, Integrase_H2C2 superfamily
Acol_Pao_Bel_Ele50	Yes	Yes	PA	Class II	LTR	Bel-Pao	Agam_Pao_Bel_Ele50#LTR/Pao_Bel	-	BEL5-I_AG#LTR/Pao	LTR	208	RT_like superfamily, Peptidase_A17 superfamily, DUF5641 superfamily, DUF1759 superfamily, pepsin_retropepsin_like superfamily, rve superfamily
Acol_Pao_Bel_Ele51	Yes	Yes	PA	Class II	LTR	Bel-Pao	Agam_Pao_Bel_Ele51#LTR/Pao_Bel	-	-	LTR	231	RT_like superfamily, Peptidase_A17 superfamily, DUF5641 superfamily, DUF1759 superfamily, RNase_H_like superfamily, RVT_1 superfamily
Acol_Pao_Bel_Ele52	Yes	Yes	PA	Class II	LTR	Bel-Pao	Agam_Pao_Bel_Ele52#LTR/Pao_Bel	BEL9_AG|Fragment|LTR|piler-ag-5-40-90-90_Clu-193	-	LTR	274	RT_like superfamily, Peptidase_A17 superfamily, DUF1759 superfamily, DUF5641 superfamily, pepsin_retropepsin_like superfamily, rve superfamily, RVT_1 superfamily
Acol_Pao_Bel_Ele53	Yes	Yes	PA	Class II	LTR	Bel-Pao	Agam_Pao_Bel_Ele53#LTR/Pao_Bel	-	Gypsy2-LTR_AG#LTR/Gypsy	LTR	338	RT_like superfamily, Peptidase_A17 superfamily, PHD_SF superfamily, DUF1759 superfamily, Integrase_H2C2 superfamily, DUF5641 superfamily
Acol_Pao_Bel_Ele55	Yes	Yes	PA	Class II	LTR	Bel-Pao	Agam_Pao_Bel_Ele55#LTR/Pao_Bel	-	BEL3-I_AG#LTR/Pao	LTR	352	RT_like superfamily, Peptidase_A17 superfamily, DUF5641 superfamily, PHD_SF superfamily, DUF1759 superfamily
Acol_Pao_Bel_Ele56	Yes	Yes	PA	Class II	LTR	Bel-Pao	Aara_Pao_Bel_Ele16#LTR/Pao_Bel	-	-	LTR	341	RT_like superfamily, Peptidase_A17 superfamily, DUF5641 superfamily, rve superfamily, Integrase_H2C2 superfamily
Acol_Pao_Bel_Ele57	Yes	Yes	PA	Class II	LTR	Bel-Pao	Aara_Pao_Bel_Ele17#LTR/Pao_Bel	-	-	LTR	239	RT_like superfamily, Peptidase_A17 superfamily, DUF5641 superfamily, DUF1759 superfamily, pepsin_retropepsin_like superfamily, rve superfamily, Integrase_H2C2 superfamily
Acol_Pao_Bel_Ele58	Yes	Yes	PA	Class II	LTR	Bel-Pao	Aara_Pao_Bel_Ele20#LTR/Pao_Bel	BEL8_AG|Full|LTR|piler-ag-5-40-90-90_Clu-176	BEL8-I_AG#LTR/Pao	LTR	228	RT_like superfamily, pepsin_retropepsin_like superfamily, DUF5641 superfamily, rve superfamily, Integrase_H2C2 superfamily
Acol_Pao_Bel_Ele59	Yes	Yes	PA	Class II	LTR	Bel-Pao	Aara_Pao_Bel_Ele22#LTR/Pao_Bel	-	-	LTR	205	Peptidase_A17 superfamily, RT_like superfamily, DUF5641 superfamily, DUF1759 superfamily, pepsin_retropepsin_like superfamily, Integrase_H2C2 superfamily, RNase_H_like superfamily, rve superfamily, LXG superfamily
Acol_Pao_Bel_Ele6	Yes	No	PA	Class II	LTR	Bel-Pao	Agam_Pao_Bel_Ele6#LTR/Pao_Bel	-	-	LTR	359	Peptidase_A17 superfamily, RT_like superfamily, DUF5641 superfamily, PHD_SF superfamily, DUF1759 superfamily, rve superfamily, Integrase_H2C2 superfamily, RNase_H_like superfamily
Acol_Pao_Bel_Ele60	Yes	Yes	PA	Class II	LTR	Bel-Pao	Aara_Pao_Bel_Ele6#LTR/Pao_Bel	-	-	LTR	316	RT_like superfamily, Peptidase_A17 superfamily, DUF1759 superfamily, PHD_SF superfamily, DUF5641 superfamily, Integrase_H2C2 superfamily
Acol_Pao_Bel_Ele61	Yes	No	PA	Class II	LTR	Bel-Pao	Aara_Pao_Bel_Ele9#LTR/Pao_Bel	BEL17_AG|Full|LTR|piler-ag-5-40-90-90_Clu-199	BEL17-I_AG#LTR/Pao	LTR	276	RT_like superfamily, Peptidase_A17 superfamily, DUF5641 superfamily, PHD_SF superfamily, DUF1759 superfamily, rve superfamily, Integrase_H2C2 superfamily, RVT_1 superfamily
Acol_Pao_Bel_Ele62	Yes	Yes	PA	Class II	LTR	Bel-Pao	Afun_Pao_Bel_Ele5#LTR/Pao_Bel	-	BEL18-I_AG#LTR/Pao	LTR	367	RT_like superfamily, Peptidase_A17 superfamily, DUF5641 superfamily, DUF1759 superfamily, pepsin_retropepsin_like superfamily
Acol_Pao_Bel_Ele63	Yes	Yes	DG	Class II	LTR	Bel-Pao	Amer_Pao_Bel_Ele12#LTR/Pao_Bel	BEL10_AG|Solo-LTR|LTR|piler-ag-5-40-90-90_Clu-179	BEL10-I_AG#LTR/Pao	LTR	551	RT_like superfamily, Peptidase_A17 superfamily, DUF5641 superfamily, DUF1759 superfamily, PHD_SF superfamily, pepsin_retropepsin_like superfamily, RNase_H_like superfamily
Acol_Pao_Bel_Ele64	Yes	Yes	PA	Class II	LTR	Bel-Pao	Amer_Pao_Bel_Ele19#LTR/Pao_Bel	BEL2_AG|Solo-LTR|LTR|piler-ag-5-40-90-90_Clu-73	BEL2-I_AG#LTR/Pao	LTR	458	RT_like superfamily, Peptidase_A17 superfamily, DUF5641 superfamily, PHD_SF superfamily, DUF1759 superfamily, pepsin_retropepsin_like superfamily, Integrase_H2C2 superfamily, rve superfamily, RNase_H_like superfamily
Acol_Pao_Bel_Ele65	Yes	Yes	PA	Class II	LTR	Bel-Pao	Amer_Pao_Bel_Ele28#LTR/Pao_Bel	-	-	LTR	289	Peptidase_A17 superfamily, RT_like superfamily, DUF5641 superfamily, DUF1759 superfamily, pepsin_retropepsin_like superfamily, rve superfamily, Integrase_H2C2 superfamily
Acol_Pao_Bel_Ele66	Yes	Yes	PA	Class II	LTR	Bel-Pao	Amer_Pao_Bel_Ele4#LTR/Pao_Bel	-	-	LTR	234	RT_like superfamily, Peptidase_A17 superfamily, DUF1759 superfamily, DUF5641 superfamily, pepsin_retropepsin_like superfamily, rve superfamily, Integrase_H2C2 superfamily, RVT_1 superfamily
Acol_Pao_Bel_Ele67	Yes	Yes	PA	Class II	LTR	Bel-Pao	Amer_Pao_Bel_Ele6#LTR/Pao_Bel	BEL4_AG|Full|LTR|piler-ag-5-40-90-90_Clu-101	BEL4-I_AG#LTR/Pao	LTR	318	RT_like superfamily, Peptidase_A17 superfamily, DUF5641 superfamily, DUF1759 superfamily, pepsin_retropepsin_like superfamily, rve superfamily
Acol_Pao_Bel_Ele68	Yes	Yes	PA	Class II	LTR	Bel-Pao	Aqua_Pao_Bel_Ele3#LTR/Pao_Bel	BEL13_AG|Full|LTR|piler-ag-5-40-90-90_Clu-130	BEL13-I_AG#LTR/Pao	LTR	240	RT_like superfamily, Peptidase_A17 superfamily, DUF5641 superfamily, DUF1759 superfamily, pepsin_retropepsin_like superfamily, rve superfamily, Integrase_H2C2 superfamily
Acol_Pao_Bel_Ele69	Yes	Yes	PA	Class II	LTR	Bel-Pao	-	BEL1_AG|Full|LTR|piler-ag-5-40-90-90_Clu-45	BEL1-I_AG#LTR/Pao	LTR	290	RT_like superfamily, Peptidase_A17 superfamily, DUF5641 superfamily, DUF1759 superfamily, rve superfamily, Integrase_H2C2 superfamily, pepsin_retropepsin_like superfamily
Acol_Pao_Bel_Ele7	Yes	Yes	PA	Class II	LTR	Bel-Pao	Agam_Pao_Bel_Ele7#LTR/Pao_Bel	-	-	LTR	299	Peptidase_A17 superfamily, RT_like superfamily, DUF5641 superfamily, rve superfamily, Integrase_H2C2 superfamily
Acol_Pao_Bel_Ele70	Yes	Yes	PA	Class II	LTR	Bel-Pao	-	BEL11_AG|Full|LTR|piler-ag-5-40-90-90_Clu-115	BEL11-I_AG#LTR/Pao	LTR	261	RT_like superfamily, Peptidase_A17 superfamily, DUF5641 superfamily, DUF1759 superfamily, pepsin_retropepsin_like superfamily, Integrase_H2C2 superfamily, rve superfamily
Acol_Pao_Bel_Ele71	Yes	No	PA	Class II	LTR	Bel-Pao	-	BEL12_AG|Full|LTR|piler-ag-5-40-90-90_Clu-140	BEL12-I_AG#LTR/Pao	LTR	205	RT_like superfamily, DUF1759 superfamily, Peptidase_A17 superfamily, pepsin_retropepsin_like superfamily, RNase_H_like superfamily, DUF5641 superfamily, rve superfamily, Integrase_H2C2 superfamily
Acol_Pao_Bel_Ele72	Yes	Yes	PA	Class II	LTR	Bel-Pao	-	BEL16_AG|Full|LTR|piler-ag-5-40-90-90_Clu-110	BEL16-I_AG#LTR/Pao	LTR	287	RT_like superfamily, Peptidase_A17 superfamily, DUF1759 superfamily, DUF5641 superfamily, pepsin_retropepsin_like superfamily, Integrase_H2C2 superfamily, RVT_1 superfamily, rve superfamily
Acol_Pao_Bel_Ele73	Yes	Yes	DG	Class II	LTR	Bel-Pao	-	Novel|Novel|LTR|piler-ag-5-40-90-90_Clu-185	BEL-21_AG-I#LTR/Pao	LTR	227	DUF1759 superfamily
Acol_Pao_Bel_Ele74	New	Yes	PA	Class II	LTR	Bel-Pao	-	-	-	LTR	370	RT_like superfamily, Peptidase_A17 superfamily, DUF5641 superfamily, DUF1759 superfamily, pepsin_retropepsin_like superfamily, Integrase_H2C2 superfamily
Acol_Pao_Bel_Ele75	Yes	Yes	PA	Class II	LTR	Bel-Pao	-	BEL14_AG|Full|LTR|piler-ag-5-40-90-90_Clu-191	BEL14-I_AG#LTR/Pao	LTR	410	RT_like superfamily, Peptidase_A17 superfamily, DUF5641 superfamily, PHD_SF superfamily, DUF1759 superfamily, rve superfamily, RVT_1 superfamily, Integrase_H2C2 superfamily, RNase_H_like superfamily
Acol_Pao_Bel_Ele76	Yes	Yes	DG	Class II	LTR	Bel-Pao	-	-	BEL-25_AG-I#LTR/Pao	LTR	241	DUF1759 superfamily, pepsin_retropepsin_like superfamily
Acol_Pao_Bel_Ele77	Yes	Yes	DG	Class II	LTR	Bel-Pao	-	BEL7_AG|Solo-LTR|LTR|piler-ag-5-40-90-90_Clu-86	BEL7-I_AG#LTR/Pao	LTR	502	PHD_SF superfamily, DUF1759 superfamily, pepsin_retropepsin_like superfamily
Acol_Pao_Bel_Ele78	New	Yes	DG	Class II	LTR	Bel-Pao	-	-	-	LTR	133	Peptidase_A17 superfamily, RT_like superfamily, DUF5641 superfamily, pepsin_retropepsin_like superfamily, Integrase_H2C2 superfamily
Acol_Pao_Bel_Ele79	New	Yes	DG	Class II	LTR	Bel-Pao	-	-	-	LTR	303	DUF1759 superfamily
Acol_Pao_Bel_Ele8	Yes	Yes	PA	Class II	LTR	Bel-Pao	Agam_Pao_Bel_Ele8#LTR/Pao_Bel	AGM1_AG|Full|LTR|piler-ag-5-40-90-90_Clu-238	AGM1-I#LTR/Pao	LTR	267	Peptidase_A17 superfamily, RT_like superfamily, DUF5641 superfamily, DUF1759 superfamily, pepsin_retropepsin_like superfamily, rve superfamily
Acol_Pao_Bel_Ele80	New	Yes	DG	Class II	LTR	Bel-Pao	-	-	-	LTR	860	PHD_SF superfamily, DUF1759 superfamily
Acol_Pao_Bel_Ele81	New	Yes	DG	Class II	LTR	Bel-Pao	-	-	-	LTR	317	RT_like superfamily, Peptidase_A17 superfamily, DUF5641 superfamily, rve superfamily, Integrase_H2C2 superfamily, PHD_SF superfamily
Acol_Pao_Bel_Ele9	Yes	Yes	PA	Class II	LTR	Bel-Pao	Agam_Pao_Bel_Ele9#LTR/Pao_Bel	Novel|Novel|LTR|piler-ag-5-40-90-90_Clu-174	BEL-20_AG-I#LTR/Pao	LTR	216	RT_like superfamily, Peptidase_A17 superfamily, DUF5641 superfamily, DUF1759 superfamily, pepsin_retropepsin_like superfamily, Integrase_H2C2 superfamily, rve superfamily
Acol_PIF_Ele1	Yes	Yes	PA	Class I	DNA	PIF-Harbinger	Agam_PIF_Ele1#DNA/PIF	-	-	TIR	21	DDE_Tnp_4 superfamily
Acol_PIF_Ele10	New	Yes	DG	Class I	DNA	PIF-Harbinger	-	-	-	Missing	0
Acol_PIF_Ele11	New	Yes	PNA	Class I	DNA	PIF-Harbinger	-	-	-	TIR	10
Acol_PIF_Ele12	Yes	Yes	DG	Class I	DNA	PIF-Harbinger	-	HARBINGERN2_AG|NA|TIR|piler-ag-5-40-90-90_Clu-20	HarbingerN2_AG#DNA/PIF-Harbinger	Missing	0
Acol_PIF_Ele2	Yes	Yes	PNA	Class I	DNA	PIF-Harbinger	Agam_PIF_Ele2#DNA/PIF	-	-	TIR	40
Acol_PIF_Ele3	Yes	Yes	DG	Class I	DNA	PIF-Harbinger	Agam_PIF_Ele3#DNA/PIF	-	-	Missing	0
Acol_PIF_Ele4	Yes	Yes	PA*	Class I	DNA	PIF-Harbinger	Agam_gambol_Ele8#DNA/gambol	-	-	Missing	0	rve superfamily
Acol_PIF_Ele5	Yes	Yes	DG	Class I	DNA	PIF-Harbinger	Agam_m3bp_Ele29#MITEs/m3bp	HARBINGER1_AG|MITE-like|TIR|piler-ag-5-40-90-90_Clu-35	Harbinger1_AG#DNA/PIF-Harbinger	Missing	0
Acol_PIF_Ele6	Yes	Yes	PA*	Class I	DNA	PIF-Harbinger	-	-	Harbinger-2_AG#DNA/PIF-Harbinger	Missing	0	DDE_Tnp_4 superfamily
Acol_PIF_Ele7	New	Yes	PNA	Class I	DNA	PIF-Harbinger	-	-	-	Missing	0
Acol_PIF_Ele8	Yes	Yes	PNA	Class I	DNA	PIF-Harbinger	-	GAMBOL_ELE8|Fragment|TIR|piler-ag-5-40-90-90_Clu-54	-	TIR	25
Acol_PIF_Ele9	New	Yes	PNA	Class I	DNA	PIF-Harbinger	-	-	-	TIR	12
Acol_piggyBac_Ele1	Yes	Yes	PA*	Class I	DNA	PiggyBac	Agam_piggyBac_Ele1#DNA/piggyBac	-	-	Missing	0	DDE_Tnp_1_7 superfamily
Acol_piggyBac_Ele2	Yes	Yes	DG	Class I	DNA	PiggyBac	Aara_piggyBac_Ele1#DNA/piggyBac	-	-	Missing	0
Acol_piggyBac_Ele3	Yes	No	DG	Class I	DNA	PiggyBac	Agam_Tc1_Ele9#DNA/Tc1	-	-	Missing	0
Acol_piggyBac_Ele4	Yes	Yes	PNA	Class I	DNA	PiggyBac	Amer_piggyBac_Ele1#DNA/piggyBac	Novel|MITE-like|TIR|piler-ag-5-40-90-90_Clu-197	piggyBacN2_AG#DNA/PiggyBac	TIR	18
Acol_piggyBac_Ele5	Yes	Yes	PNA	Class I	DNA	PiggyBac	-	-	piggyBacN1_AG#DNA/PiggyBac	TIR	21
Acol_piggyBac_Ele6	Yes	Yes	PNA	Class I	DNA	PiggyBac	-	Novel|MITE-like|TIR|piler-ag-5-40-90-90_Clu-186	Clu-186_AG#DNA/Zator	TIR	31
Acol_piggyBac_Ele7	Yes	No	DG	Class I	DNA	PiggyBac	-	-	piggyBac1_AG#DNA/PiggyBac	Missing	0
Acol_R1_Ele1	Yes	Yes	PA	Class II	LINE	R1	Agam_R1_Ele1#LINE/R1	-	MinoAg1#LINE/R1	NA	-	EEP superfamily, RT_like superfamily, RVT_1 superfamily
Acol_R1_Ele10	Yes	No	PA	Class II	LINE	R1	Agam_R1_Ele10#LINE/R1	-	R6Ag1#LINE/R1	NA	-	EEP superfamily, RT_like superfamily, RVT_1 superfamily
Acol_R1_Ele11	Yes	No	DG	Class II	LINE	R1	Agam_R1_Ele11#LINE/R1	-	-	NA	-	RT_like superfamily, RVT_1 superfamily
Acol_R1_Ele12	Yes	Yes	PA	Class II	LINE	R1	Agam_R1_Ele12#LINE/R1	-	-	NA	-	EEP superfamily, RT_like superfamily, RVT_1 superfamily
Acol_R1_Ele13	Yes	Yes	DG	Class II	LINE	R1	Agam_R1_Ele13#LINE/R1	-	WaldoAg2#LINE/R1	NA	-	EEP superfamily
Acol_R1_Ele14	Yes	Yes	PA	Class II	LINE	R1	Agam_R1_Ele14#LINE/R1	-	Waldo1_AG#LINE/R1	NA	-	EEP superfamily, RT_like superfamily
Acol_R1_Ele15	Yes	Yes	PA	Class II	LINE	R1	Aara_AR_R1_Ele5#LINE/R1	-	RTAg3#LINE/R1	NA	-	EEP superfamily, RT_like superfamily, RVT_1 superfamily
Acol_R1_Ele16	Yes	Yes	PA	Class II	LINE	R1	Agam_RT1#LINE/R1	-	RT1#LINE/R1	NA	-	EEP superfamily, RT_like superfamily, RVT_1 superfamily, ZnF_C2HC superfamily
Acol_R1_Ele17	Yes	Yes	PA	Class II	LINE	R1	Agam_RT2#LINE/R1	-	RT2#LINE/R1	NA	-	EEP superfamily, RT_like superfamily, RVT_1 superfamily
Acol_R1_Ele18	Yes	No	PA	Class II	LINE	R1	Aqua_QD_R1_Ele_1#LINE/R1	-	R6Ag3#LINE/R1	NA	-	ZnF_C2HC superfamily, EEP superfamily, RT_like superfamily, RVT_1 superfamily
Acol_R1_Ele19	New	Yes	PA	Class II	LINE	R1	-	-	-	NA	-	EEP superfamily, RT_like superfamily, RVT_1 superfamily
Acol_R1_Ele2	Yes	No	DG	Class II	LINE	R1	Agam_R1_Ele2#LINE/R1	-	-	NA	-
Acol_R1_Ele3	Yes	Yes	PA	Class II	LINE	R1	Agam_R1_Ele3#LINE/R1	-	-	NA	-	EEP superfamily, RT_like superfamily, RVT_1 superfamily
Acol_R1_Ele4	Yes	Yes	PA	Class II	LINE	R1	Agam_R1_Ele4#LINE/R1	-	RTAg4#LINE/R1	NA	-	EEP superfamily, RT_like superfamily, RVT_1 superfamily
Acol_R1_Ele5	Yes	Yes	PA	Class II	LINE	R1	Agam_R1_Ele5#LINE/R1	-	HidaAg1#LINE/R1	NA	-	EEP superfamily, RT_like superfamily, RVT_1 superfamily, zf-RVT superfamily, ZnF_C2HC superfamily
Acol_R1_Ele6	Yes	Yes	PA	Class II	LINE	R1	Agam_R1_Ele6#LINE/R1	-	Ag-R1-6#LINE/R1	NA	-	EEP superfamily, RT_like superfamily, RVT_1 superfamily
Acol_R1_Ele7	Yes	Yes	PA	Class II	LINE	R1	Agam_R1_Ele7#LINE/R1	-	R7Ag2#LINE/R1	NA	-	EEP superfamily, RT_like superfamily, RVT_1 superfamily
Acol_R1_Ele8	Yes	No	PA	Class II	LINE	R1	Agam_R1_Ele8#LINE/R1	-	R7Ag1#LINE/R1	NA	-	EEP superfamily, RT_like superfamily, RVT_1 superfamily
Acol_R1_Ele9	Yes	Yes	PA	Class II	LINE	R1	Agam_R1_Ele9#LINE/R1	-	-	NA	-	EEP superfamily, RT_like superfamily, RVT_1 superfamily
Acol_RTE_Ele1	Yes	Yes	DG	Class II	LINE	RTE	Agam_RTE_Ele1#LINE/RTE	RTE_ELE1|Full|NLTR|piler-ag-5-40-90-90_Clu-103	RTE-2_AG#LINE/RTE-BovB	NA	-	EEP superfamily
Acol_RTE_Ele2	Yes	Yes	PA	Class II	LINE	RTE	Agam_RTE_Ele2#LINE/RTE	RTE_ELE2|Full|NLTR|piler-ag-5-40-90-90_Clu-2	RTE-1_AG#LINE/RTE	NA	-	RT_like superfamily, EEP superfamily, RVT_1 superfamily
Acol_RTE_Ele3	Yes	Yes	DG	Class II	LINE	RTE	Amer_MR_R1-Ele_13#LINE/RTE	-	RTE-3_AG#LINE/RTE-BovB	NA	-	RT_like superfamily, RVT_1 superfamily
Acol_Tc1_Ele1	Yes	Yes	PA	Class I	DNA	Tc1-Mariner	Agam_Tc1_Ele1a#DNA/Tc1	Tc1_AG|FULL|TIR|piler-ag-5-40-90-90_Clu-41	Tc1-1_AG#DNA/TcMar-Tc1	TIR	26	HTH_Tnp_Tc3_2 superfamily, rve superfamily, COG3415 superfamily, HTH superfamily
Acol_Tc1_Ele12	Yes	No	DG	Class I	DNA	Tc1-Mariner	Agam_Tc1_Ele12#DNA/Tc1	-	-	Missing	0
Acol_Tc1_Ele13	Yes	No	DG	Class I	DNA	Tc1-Mariner	Agam_Tc1_Ele13#DNA/Tc1	-	-	Missing	0
Acol_Tc1_Ele15	Yes	Yes	PNA	Class I	DNA	Tc1-Mariner	Agam_Tc1_Ele15#DNA/Tc1	-	-	TIR	28
Acol_Tc1_Ele16	Yes	Yes	PNA	Class I	DNA	Tc1-Mariner	Agam_Tc1_Ele16#DNA/Tc1	-	Mariner1_AG#DNA/TcMar-Tc1	TIR	35
Acol_Tc1_Ele17	Yes	Yes	PNA	Class I	DNA	Tc1-Mariner	Aara_Tc1_Ele11#DNA/Tc1	Tc1_Tango|MITE-like|TIR|piler-ag-5-40-90-90_Clu-74	Mariner-N16_AG#DNA/TcMar-Tc1	TIR	341
Acol_Tc1_Ele18	Yes	Yes	PNA	Class I	DNA	Tc1-Mariner	Aara_Tc1_Ele15#DNA/Tc1	MARINERN1_AG|NA|TIR|piler-ag-5-40-90-90_Clu-4	MarinerN1_AG#DNA/TcMar-Tc1	TIR	25
Acol_Tc1_Ele19	Yes	Yes	DG	Class I	DNA	Tc1-Mariner	Aqua_Tc1_Ele7#DNA/Tc1	TSESSEBEII_AG|Fragment|TIR|piler-ag-5-40-90-90_Clu-6	Mariner-N22_AG#DNA/TcMar-Tc1	Missing	0
Acol_Tc1_Ele2	Yes	No	PA	Class I	DNA	Tc1-Mariner	Agam_Tc1_Ele2#DNA/Tc1	-	-	TIR	225	HTH_Tnp_Tc3_2 superfamily, rve superfamily, HTH superfamily
Acol_Tc1_Ele20	Yes	Yes	PA	Class I	DNA	Tc1-Mariner	Aste_Tc1_Ele1#DNA/Tc1	-	-	TIR	19	HTH_48 superfamily
Acol_Tc1_Ele3	Yes	Yes	PA	Class I	DNA	Tc1-Mariner	Agam_Tc1_Ele3#DNA/Tc1	-	Mariner2_AG#DNA/TcMar-Tc1	TIR	275	HTH_Tnp_Tc3_2 superfamily, rve superfamily, HTH superfamily, COG3415 superfamily
Acol_Tc1_Ele4	Yes	Yes	PA*	Class I	DNA	Tc1-Mariner	Agam_Tc1_Ele4#DNA/Tc1	TSESSEBEII_AG|FULL|TIR|piler-ag-5-40-90-90_Clu-133	TSESSEBEII#DNA/TcMar-Tc1	Missing	0	rve superfamily
Acol_Tc1_Ele5	Yes	Yes	PA	Class I	DNA	Tc1-Mariner	Agam_Tc1_Ele5#DNA/Tc1	-	-	TIR	27	HTH_Tnp_Tc3_2 superfamily, rve superfamily, HTH superfamily
Acol_Tc1_Ele6	Yes	No	DG	Class I	DNA	Tc1-Mariner	Agam_Tc1_Ele7#DNA/Tc1	-	-	Missing	0
Acol_Tc1-mar_Ele1	Yes	Yes	PA	Class I	DNA	Tc1-Mariner	Agam_ITmD37E_Ele1#DNA/ITmD37E	Tx_MOS|FULL|TIR|piler-ag-5-40-90-90_Clu-114	Tx_mos#DNA/TcMar-Tc1	TIR	29	HTH superfamily
Acol_Tc1-mar_Ele10	Yes	Yes	PNA	Class I	DNA	Tc1-Mariner	-	MARINER_ELE29|Fragment|TIR|piler-ag-5-40-90-90_Clu-113	-	TIR	13
Acol_Tc1-mar_Ele11	Yes	Yes	PNA	Class I	DNA	Tc1-Mariner	-	-	DNA-4_AG#DNA/TcMar-Tigger	TIR	25
Acol_Tc1-mar_Ele12	Yes	No	PNA	Class I	DNA	Tc1-Mariner	-	MARINERN5_AG|NA|TIR|piler-ag-5-40-90-90_Clu-83	EnSpm-N1_AG#DNA/CMC-EnSpm	TIR	12
Acol_Tc1-mar_Ele2	Yes	Yes	PNA	Class I	DNA	Tc1-Mariner	Agam_mTA_Ele18#MITEs/mTA	Novel|MITE-like|TIR|piler-ag-5-40-90-90_Clu-66	Mariner-N19_AG#DNA/TcMar-Tc1	TIR	27
Acol_Tc1-mar_Ele3	Yes	Yes	PNA	Class I	DNA	Tc1-Mariner	-	MARINERN6_AG|NA|TIR|piler-ag-5-40-90-90_Clu-30	MarinerN6_AG#DNA/TcMar-Tc1	TIR	12
Acol_Tc1-mar_Ele4	Yes	Yes	PNA	Class I	DNA	Tc1-Mariner	-	-	Mariner-N21_AG#DNA/TcMar-Tigger	TIR	25
Acol_Tc1-mar_Ele5	Yes	Yes	PNA	Class I	DNA	Tc1-Mariner	-	GAMBOL_ELE1|MITE-like|TIR|piler-ag-5-40-90-90_Clu-100	TC1N-2_AG#DNA/TcMar-Tc1	TIR	318
Acol_Tc1-mar_Ele6	Yes	Yes	PNA	Class I	DNA	Tc1-Mariner	-	MARINERN8_AG|NA|TIR|piler-ag-5-40-90-90_Clu-90	MarinerN8_AG#DNA/TcMar-Tc1	TIR	35
Acol_Tc1-mar_Ele7	Yes	No	PNA	Class I	DNA	Tc1-Mariner	-	-	MarinerN11_AG#DNA/TcMar-Tc1	TIR	11
Acol_Tc1-mar_Ele8	Yes	Yes	PNA	Class I	DNA	Tc1-Mariner	-	Novel|MITE-like|TIR|piler-ag-5-40-90-90_Clu-13	Clu-13_AG#DNA/TcMar-Fot1	TIR	28
Acol_Tc1-mar_Ele9	New	Yes	PNA	Class I	DNA	Tc1-Mariner	-	-	-	TIR	15
Acol_Transib_Ele1	Yes	No	DG	Class I	DNA	Transib	Agam_Angam_Transib1#DNA/Transib	-	TRANSIB1_AG#DNA/CMC-Transib	Missing	0
Acol_Transib_Ele2	Yes	Yes	PNA	Class I	DNA	Transib	-	TRANSIBN1_AG|NA|TIR|piler-ag-5-40-90-90_Clu-51	TRANSIBN1_AG#DNA/CMC-Transib	TIR	14
Acol_tSINE_Ele1	Yes	Yes	PNA	Class II	SINE	tSINE	Aqua_tSINE_Ele1#SINE/tSINE	-	SINEX-1_AG#SINE?	NA	-	-
Acol_tSINE_Ele2	Yes	Yes	PNA	Class II	SINE	tSINE	Aqua_tSINE_Ele2#SINE/tSINE	-	SINEX-2_AG#SINE?	NA	-	-
