# Supplementary material for: Transposable element variants and their potential adaptive impact in urban populations of the malaria vector Anopheles coluzzii
Source: HighWire-hosted journal article supplement (doi:10.1101/gr.275761.121), 2021-12-29
Supplement: Supplemental_Table_S4.xlsx [file Supplemental_Table_S4.xlsx]

## Sheet: S4. Novel TE Families
Table S4. Newly identified TE families. The 64 families were classified as follows: 32 DNA, 9 LINEs and 23 LTRs. Moreover, the majority of the new families (43/64) had partial matches to other known TEs, thus allowing us to classify them at the superfamily level. For each genome, the total number of insertions, the number of NFL (near full-length fragments, covering at least 90% of the consensus)…
																														Anopheles															Culex	Aedes	Drosophila	Genus
																														Nyssorhynchus	Anopheles	Cellia																Subgenus
																																Neomyzomyia	Myzomyia	Neocellia	Pyretophorous													Series
Name	Class	Order	Superfamily	TIR or LTR identified	DLA112			DLA155B			DLA146			LBV88			LBV136			LBV11			AcolN1			Median			NFL Fraction	Aalb	Aatr	Afar	Afun	Aste	Aepi	Achr	Amer	Agam	Acol	Amel	Aara	Aqua	Abwa	Afon	Cqui	Aaeg	Dmel
					total	NFL	FL	total	NFL	FL	total	NFL	FL	total	NFL	FL	total	NFL	FL	total	NFL	FL	total	NFL	FL	total	NFL	FL
Acol_CACTA_Ele1	Class I	DNA	CACTA	YES	142	-	-	96	-	-	112	-	-	86	-	-	108	-	-	104	-	-	134	-	-	108	-	-	-	0	0	0	0	1	0	0	8	7	7	2	0	1	4	4	0	0	0
Acol_CACTA_Ele2	Class I	DNA	CACTA	NO	48	-	-	30	-	-	50	-	-	42	-	-	43	-	-	42	-	-	38	-	-	42	-	-	-	1	1	0	1	0	0	0	1	4	2	0	0	1	3	3	0	0	0
Acol_CACTA_Ele3	Class I	DNA	CACTA	NO	59	-	-	37	-	-	54	-	-	47	-	-	51	-	-	65	-	-	73	-	-	54	-	-	-	0	2	0	0	0	1	0	1	7	4	1	4	0	5	4	0	0	0
Acol_CACTA_Ele4	Class I	DNA	CACTA	NO	78	-	-	45	-	-	64	-	-	59	-	-	66	-	-	75	-	-	109	-	-	66	-	-	-	0	0	1	0	0	3	1	4	4	3	0	1	0	3	3	0	0	0
Acol_CACTA_Ele5	Class I	DNA	CACTA	NO	127	-	-	65	-	-	104	-	-	95	-	-	95	-	-	118	-	-	145	-	-	104	-	-	-	0	0	0	0	0	0	0	4	1	4	0	1	1	1	0	0	0	0
Acol_CACTA_Ele6	Class I	DNA	CACTA	NO	138	-	-	94	-	-	115	-	-	114	-	-	96	-	-	109	-	-	112	-	-	112	-	-	-	0	12	16	190	290	3	26	12	24	23	9	13	6	18	15	0	0	0
Acol_copia_Ele25	Class II	LTR	Copia	YES	43	4	3	20	1	1	29	4	2	32	3	1	26	3	1	23	5	4	38	3	3	29	3	2	0.103448	0	1	0	1	0	0	0	2	7	11	2	3	1	10	5	0	0	0
Acol_copia_Ele26	Class II	LTR	Copia	YES	17	2	1	15	4	2	15	2	2	15	3	3	16	1	1	17	2	2	16	2	2	16	2	2	0.125	0	0	0	0	0	0	0	4	3	6	1	0	5	8	8	0	8	0
Acol_copia_Ele28	Class II	LTR	Copia	YES	26	1	1	13	1	1	23	2	1	19	3	1	15	3	1	21	2	2	27	3	1	21	2	1	0.0952381	0	1	0	1	1	1	0	5	12	8	1	1	2	9	16	0	0	0
Acol_gambol_Ele14	Class I	DNA	Gambol	YES	24	3	2	15	2	2	20	2	2	21	2	2	20	3	1	26	3	3	40	2	2	21	2	2	0.0952381	0	0	0	0	0	0	0	0	5	4	0	2	7	3	3	0	0	0
Acol_gambol_Ele16	Class I	DNA	Gambol	YES	121	15	13	110	15	13	107	14	13	116	17	16	113	10	8	120	17	16	137	25	23	116	15	13	0.12931	0	0	0	0	1	0	1	58	36	44	22	37	39	42	34	0	0	0
Acol_gypsy_Ele83	Class II	LTR	Gypsy	YES	45	3	1	22	3	3	35	7	4	21	5	2	25	5	2	38	5	2	29	4	4	29	5	2	0.172414	0	0	0	0	0	1	0	3	6	11	0	2	2	4	6	0	0	0
Acol_gypsy_Ele84	Class II	LTR	Gypsy	YES	41	-	-	36	-	-	43	-	-	37	-	-	28	-	-	37	-	-	48	-	-	37	-	-	-	0	1	1	9	3	1	1	14	3	6	3	5	6	12	11	0	0	0
Acol_gypsy_Ele86	Class II	LTR	Gypsy	YES	66	-	-	67	-	-	51	-	-	62	-	-	61	-	-	56	-	-	52	-	-	61	-	-	-	1	0	0	4	0	4	1	2	14	14	3	6	5	4	5	1	3	0
Acol_gypsy_Ele87	Class II	LTR	Gypsy	YES	64	-	-	47	-	-	46	-	-	62	-	-	58	-	-	68	-	-	63	-	-	62	-	-	-	0	1	1	0	0	2	0	13	6	9	2	12	4	15	14	9	0	0
Acol_gypsy_Ele89	Class II	LTR	Gypsy	NO	43	-	-	27	-	-	27	-	-	32	-	-	29	-	-	36	-	-	39	-	-	32	-	-	-	0	1	2	0	1	0	0	3	4	7	1	2	6	6	11	0	7	0
Acol_gypsy_Ele90	Class II	LTR	Gypsy	YES	91	-	-	58	-	-	81	-	-	94	-	-	69	-	-	85	-	-	71	-	-	81	-	-	-	0	0	0	2	0	1	2	4	15	22	1	8	3	18	10	0	0	0
Acol_gypsy_Ele91	Class II	LTR	Gypsy	NO	124	1	0	113	1	0	137	2	2	119	3	0	116	1	1	124	4	1	140	4	1	124	2	1	0.016129	0	0	0	1	0	5	0	12	27	43	9	8	12	30	17	0	0	0
Acol_gypsy_Ele92	Class II	LTR	Gypsy	YES	52	-	-	46	-	-	50	-	-	49	-	-	43	-	-	48	-	-	45	-	-	48	-	-	-	0	0	0	1	0	0	0	3	10	9	3	6	7	11	13	0	1	0
Acol_gypsy_Ele93	Class II	LTR	Gypsy	YES	93	-	-	80	-	-	84	-	-	77	-	-	74	-	-	80	-	-	86	-	-	80	-	-	-	0	1	0	0	0	2	0	7	6	5	6	5	4	13	13	0	0	0
Acol_gypsy_Ele94	Class II	LTR	Gypsy	YES	39	-	-	26	-	-	37	-	-	18	-	-	24	-	-	21	-	-	32	-	-	26	-	-	-	0	0	1	0	0	1	3	5	12	15	1	6	4	11	14	0	4	1
Acol_gypsy_Ele95	Class II	LTR	Gypsy	YES	148	-	-	109	-	-	118	-	-	172	-	-	116	-	-	108	-	-	149	-	-	118	-	-	-	0	1	0	6	0	2	0	9	16	21	10	7	5	37	17	0	0	0
Acol_hAT_Ele12	Class I	DNA	hAT	YES	274	11	2	228	9	1	256	11	2	249	12	2	226	10	2	266	9	4	271	19	6	256	11	2	0.0429688	0	0	0	1	0	28	3	62	47	55	66	20	50	62	51	0	2	0
Acol_hAT_Ele13	Class I	DNA	hAT	YES	262	5	4	229	8	6	267	8	3	238	6	5	247	5	5	278	6	4	279	6	5	262	6	5	0.0229008	0	23	0	12	0	10	5	35	65	59	75	48	41	61	48	0	0	0
Acol_hAT_Ele16	Class I	DNA	hAT	YES	114	45	46	105	44	45	96	45	46	106	51	51	90	36	37	103	41	41	106	45	47	105	45	46	0.428571	0	0	0	0	0	0	0	70	52	55	37	44	56	103	80	0	0	0
Acol_Jockey_Ele27	Class II	LINE	Jockey	NA	117	-	-	116	-	-	118	-	-	118	-	-	122	-	-	113	-	-	137	-	-	118	-	-	-	0	0	0	0	0	3	0	9	14	18	9	10	10	15	29	0	0	0
Acol_Jockey_Ele28	Class II	LINE	Jockey	NA	203	-	-	198	-	-	205	-	-	190	-	-	192	-	-	177	-	-	221	-	-	198	-	-	-	0	0	0	0	0	3	0	41	62	56	14	45	43	57	82	0	7	0
Acol_L1_Ele8	Class II	LINE	L1	NA	31	7	6	20	4	4	33	7	6	23	5	4	20	2	1	21	4	4	28	4	4	23	4	4	0.173913	0	5	12	2	0	3	2	7	9	8	1	2	2	10	9	0	0	0
Acol_L2_Ele5	Class II	LINE	L2	NA	144	1	0	129	2	0	128	2	0	134	1	0	109	3	0	126	2	0	125	3	2	128	2	0	0.015625	0	9	0	7	5	9	9	23	31	37	16	17	27	33	29	9	90	0
Acol_Loner_Ele3	Class II	LINE	Loner	NA	35	3	2	39	1	0	40	3	2	42	2	0	42	4	2	41	3	1	40	3	0	40	3	1	0.075	0	2	18	0	1	45	27	14	17	17	7	18	13	22	19	0	0	0
Acol_LTR_Ele2	Class II	LTR		YES	42	2	2	37	5	4	46	5	2	55	6	5	38	2	2	47	4	4	29	1	1	42	4	2	0.0952381	0	0	0	0	0	0	0	4	5	4	2	1	4	9	7	0	0	0
Acol_LTR_Ele3	Class II	LTR		YES	15	2	1	18	5	1	24	4	1	16	2	0	17	4	0	23	4	2	27	4	0	18	4	1	0.222222	0	1	0	0	0	0	0	0	1	4	0	0	0	0	0	0	0	0
Acol_LTR_Ele4	Class II	LTR		YES	245	27	15	175	16	7	192	18	7	203	24	12	205	18	6	202	28	21	227	34	25	203	24	12	0.118227	0	0	0	0	0	0	2	9	41	54	7	12	19	47	20	0	0	0
Acol_LTR_Ele6	Class II	LTR		YES	178	3	3	155	2	2	186	2	2	169	2	2	157	3	1	159	5	5	180	4	4	169	3	2	0.0177515	0	0	0	0	0	1	1	10	13	13	11	7	5	13	13	0	0	0
Acol_mTA_Ele28	Class I	DNA	mTA	YES	32	1	1	17	1	0	20	1	0	23	1	1	19	1	0	13	1	0	21	1	1	20	1	0	0.05	0	0	0	0	0	0	0	1	3	4	3	2	1	2	2	0	0	0
Acol_mTA_Ele30	Class I	DNA	mTA	YES	84	7	6	71	6	6	78	8	8	71	8	8	61	5	5	77	8	8	82	7	7	77	7	7	0.0909091	0	0	0	14	0	0	11	2	18	14	3	11	4	9	11	0	0	0
Acol_otherMITEs_Eles15	Class I	DNA		YES	148	13	11	119	12	10	139	20	15	121	20	18	122	17	15	128	22	18	158	26	21	128	20	15	0.15625	0	0	0	13	0	0	1	19	42	54	6	34	12	25	20	0	316	0
Acol_otherMITEs_Eles16	Class I	DNA		YES	1415	0	0	1375	2	0	1348	0	0	1433	1	0	1344	0	0	1369	0	0	1445	0	0	1375	0	0	0	0	1	0	10	0	37	2	285	166	114	131	111	154	185	188	14	3	0
Acol_otherMITEs_Eles17	Class I	DNA		YES	53	4	3	28	5	4	40	4	4	46	5	5	37	3	3	55	6	6	58	12	11	46	5	4	0.108696	1	0	0	0	0	0	0	1	11	21	4	0	4	5	7	0	0	0
Acol_otherMITEs_Eles18	Class I	DNA		YES	110	14	7	83	12	5	94	13	5	97	14	5	79	11	3	89	14	6	127	17	11	94	14	5	0.148936	0	1	0	14	0	3	22	25	30	46	6	21	31	63	51	0	0	0
Acol_otherMITEs_Eles19	Class I	DNA		YES	332	26	3	263	12	1	305	27	5	303	27	10	274	15	5	308	29	8	302	23	7	303	26	5	0.0858086	0	3	0	1	0	0	0	19	23	31	6	15	10	29	12	0	0	0
Acol_otherMITEs_Eles2	Class I	DNA		YES	89	27	25	93	34	31	86	25	21	94	33	31	78	28	24	120	58	52	112	49	47	93	33	31	0.354839	0	0	0	0	0	0	0	36	49	63	25	23	19	29	12	0	0	0
Acol_otherMITEs_Eles20	Class I	DNA		YES	333	13	2	318	11	3	315	15	4	328	14	4	315	11	2	304	10	1	307	11	2	315	11	2	0.0349206	0	0	0	0	0	0	0	69	77	74	49	67	69	101	86	0	0	0
Acol_otherMITEs_Eles22	Class I	DNA		YES	162	43	27	125	26	20	127	35	20	131	36	23	102	30	13	142	40	26	187	54	36	131	36	23	0.274809	0	0	0	0	1	8	4	22	87	103	2	17	30	63	53	0	0	0
Acol_otherMITEs_Eles23	Class I	DNA		YES	58	27	15	31	11	11	51	25	16	42	13	12	42	16	11	48	26	19	69	36	35	48	25	15	0.520833	0	0	0	1	0	0	2	2	22	45	1	2	0	11	3	0	0	0
Acol_otherMITEs_Eles24	Class I	DNA		YES	414	6	0	301	5	0	371	7	0	367	16	1	295	7	0	385	20	0	480	6	0	371	7	0	0.0188679	0	0	2	3	0	2	0	31	72	64	9	15	28	134	40	0	0	0
Acol_otherMITEs_Eles27	Class I	DNA		YES	70	7	6	62	9	8	68	8	6	74	8	7	60	11	9	65	12	10	75	7	6	68	8	7	0.117647	0	0	0	0	1	3	2	12	42	31	8	16	5	14	13	0	0	0
Acol_otherMITEs_Eles29	Class I	DNA		YES	67	3	3	50	2	2	62	3	2	66	6	6	47	7	6	62	6	6	73	10	10	62	6	6	0.0967742	0	0	0	0	0	0	1	8	20	24	13	9	11	14	10	0	0	0
Acol_otherMITEs_Eles9	Class I	DNA		YES	30	7	6	35	6	4	34	4	4	33	3	2	32	7	5	35	7	4	31	5	4	33	6	4	0.181818	0	0	0	0	0	0	0	43	7	11	2	4	5	4	5	0	0	0
Acol_Outcast_Ele7	Class II	LINE	Outcast	NA	53	4	3	34	6	4	35	3	2	36	4	4	33	1	1	42	4	3	32	3	3	35	4	3	0.114286	0	0	0	0	0	0	0	7	4	8	3	5	0	4	6	0	0	0
Acol_Outcast_Ele8	Class II	LINE	Outcast	NA	89	4	3	83	4	2	64	4	1	83	6	0	69	2	0	73	8	7	77	2	0	77	4	1	0.0519481	1	7	0	4	6	15	15	17	18	16	10	8	14	9	15	0	0	0
Acol_Outcast_Ele9	Class II	LINE	Outcast	NA	54	-	-	43	-	-	44	-	-	50	-	-	47	-	-	46	-	-	52	-	-	47	-	-	-	0	0	0	0	0	0	0	4	6	7	1	0	4	3	6	0	0	0
Acol_P_Ele12	Class I	DNA	P	YES	47	-	-	32	-	-	39	-	-	26	-	-	34	-	-	36	-	-	40	-	-	36	-	-	-	0	0	0	0	0	8	3	42	31	28	43	18	35	69	38	0	0	0
Acol_Pao_Bel_Ele74	Class II	LTR	Bel-Pao	YES	40	6	1	26	8	2	33	4	2	49	6	1	36	2	0	30	3	1	27	5	1	33	5	1	0.151515	0	0	0	0	0	0	0	7	12	14	11	6	14	16	17	0	0	0
Acol_Pao_Bel_Ele78	Class II	LTR	Bel-Pao	YES	23	-	-	25	-	-	18	-	-	20	-	-	26	-	-	22	-	-	30	-	-	23	-	-	-	0	0	0	1	0	0	0	5	7	9	1	1	6	10	7	0	0	0
Acol_Pao_Bel_Ele79	Class II	LTR	Bel-Pao	YES	31	-	-	34	-	-	39	-	-	29	-	-	31	-	-	34	-	-	38	-	-	34	-	-	-	0	0	0	0	0	0	0	13	11	12	5	8	0	14	4	0	0	0
Acol_Pao_Bel_Ele80	Class II	LTR	Bel-Pao	YES	53	-	-	44	-	-	65	-	-	57	-	-	65	-	-	44	-	-	47	-	-	53	-	-	-	0	0	4	0	0	1	1	12	14	11	3	3	10	13	13	0	0	0
Acol_Pao_Bel_Ele81	Class II	LTR	Bel-Pao	YES	87	-	-	63	-	-	68	-	-	84	-	-	56	-	-	74	-	-	93	-	-	74	-	-	-	0	0	0	0	0	1	2	11	22	20	6	12	10	20	26	3	0	0
Acol_PIF_Ele10	Class I	DNA	PIF-Harbinger	NO	541	-	-	480	-	-	512	-	-	494	-	-	493	-	-	521	-	-	539	-	-	512	-	-	-	0	1	2	3	22	6	0	14	27	35	5	13	12	27	22	0	0	0
Acol_PIF_Ele11	Class I	DNA	PIF-Harbinger	YES	471	42	24	422	36	15	469	46	26	459	41	18	440	40	17	463	43	15	511	38	16	463	41	17	0.0885529	0	0	0	62	9	36	10	75	97	105	82	95	79	119	100	0	0	0
Acol_PIF_Ele7	Class I	DNA	PIF-Harbinger	NO	43	3	3	35	4	4	36	2	1	39	3	2	32	5	4	40	4	3	48	6	6	39	4	3	0.102564	0	0	0	1	0	0	1	4	15	25	2	7	1	7	7	0	0	0
Acol_PIF_Ele9	Class I	DNA	PIF-Harbinger	YES	22	11	10	21	11	11	18	5	5	21	5	5	16	4	4	22	10	10	26	14	14	21	10	10	0.47619	0	0	0	0	1	0	0	5	4	19	1	1	0	12	4	0	0	0
Acol_R1_Ele19	Class II	LINE	R1	NA	50	5	4	37	4	3	51	6	3	52	2	2	39	4	4	41	3	1	29	3	2	41	4	3	0.097561	0	0	0	0	0	0	0	6	7	7	0	4	3	9	5	0	0	0
Acol_Tc1-mar_Ele9	Class I	DNA	Tc1-Mariner	YES	48	5	4	27	1	1	45	2	2	38	5	4	27	4	1	35	6	6	35	4	4	35	4	4	0.114286	0	0	0	4	3	5	0	8	8	11	4	2	8	7	8	22	3	0
