# Supplementary material for: Transposable element variants and their potential adaptive impact in urban populations of the malaria vector Anopheles coluzzii
Source: HighWire-hosted journal article supplement (doi:10.1101/gr.275761.121), 2021-12-29
Supplement: Supplemental_Table_S5.xlsx [file Supplemental_Table_S5.xlsx]

## Sheet: S5. Regions enriched with TEs
Table S5. Distribution of TE insertions regarding genes. A) Chi-square tests for the total number of insertions over the size of each compartment. The expected values are calculated determining the number of insertions that would be expected given the size of the compartment. The residuals for each category are shown. B) Chi-square tests for the number of insertions group by order in each compart…
Region	DLA112	DLA155B	DLA146	LBV88	LBV136	LBV11	AcolN1
downstream	-20.4581	-16.9465	-18.3335	-17.6261	-17.5621	-18.1627	-20.3787
exon	-92.6783	-88.3111	-89.8604	-89.9215	-88.7967	-92.149	-92.9041
intergenic	101.843	92.5792	88.2807	91.9398	93.3759	90.2102	86.4873
intron	-59.2759	-48.3784	-46.7258	-51.838	-49.8251	-47.569	-44.5203
upstream	-0.527734	4.04154	1.8805	2.13139	3.12133	2.45773	1.60448
p-values	0	0	0	0	0	0	0
B)								C)
DLA112	exon	intron	upstream	downstream	intergenic			DLA112	upstream	exon	intron	downstream	intergenic
p-value	0.000114517	3.64626e-231	2.41998e-156	1.37019e-35	1.87392e-48			p-value	1.37842e-248	1.45596e-33	3.32912e-304	2.2175e-104	8.5629e-52
DNA	2.74127	11.1926	16.5985	-0.828595	-5.34318			Bel-Pao	-8.8355	1.82327	-13.2363	-5.49972	5.88301
LINE	-3.78208	-10.3473	-14.1578	3.90695	5.04703			CACTA	-4.54088	10.1903	-8.20321	-3.10417	2.8664
LTR	-0.548359	-24.4601	-15.8137	-9.56829	11.2086			Copia	-4.57326	-0.493392	-7.24309	-2.94488	3.34756
SINE	-0.852387	15.5664	-1.44804	7.86979	-7.02979			CR1	-10.8666	-4.38553	-7.90946	-3.2658	3.98654
Undetermined	0.61032	0.91286	0.563659	-0.129739	-0.469064			Gambol	-4.77465	-0.218425	1.14295	-2.68344	-0.502749
								Gypsy	-11.7701	-2.55967	-19.0454	-8.12365	8.91087
DLA155B	exon	intron	upstream	downstream	intergenic			hAT	-4.204	-0.624566	3.62829	-0.841647	-1.60189
p-value	0.00202574	2.57737e-191	1.09918e-126	9.03951e-27	3.82257e-46			Helitron	-2.82858	-0.293639	1.51773	-1.03282	-0.667293
DNA	1.93397	10.2928	15.1112	-1.25055	-5.23129			I	-3.16896	-0.584442	-0.411285	-2.08278	0.237963
LINE	-3.58839	-8.75155	-12.494	4.15285	4.62603			Jockey	-6.55292	-1.64066	-2.31518	-2.21748	1.19761
LTR	0.231085	-23.5271	-13.7949	-8.27842	11.5316			L1	-1.43593	1.47586	-2.25118	-1.31753	0.900252
SINE	-0.253432	12.4022	-3.76433	6.39888	-6.06673			L2	-4.07698	-1.71691	0.0106588	-1.05229	0.142867
Undetermined	0.40097	0.160003	1.59091	-0.0408823	-0.115295			Loner	-3.03103	-1.21654	0.523475	-0.247029	-0.134191
								m3bp	11.5892	-1.59265	5.93613	-4.7441	-2.57169
DLA146	exon	intron	upstream	downstream	intergenic			m4bp	2.69431	-1.88757	-1.01926	1.08709	0.627517
p-value	1.21967e-05	1.59148e-190	5.29992e-139	2.28873e-32	2.49041e-45			m8bp	3.06322	0.78468	10.6335	1.03749	-4.91972
DNA	3.01292	9.88691	15.8361	-1.54727	-5.05226			Maque	0.563659	0.61032	0.91286	-0.129739	-0.469064
LINE	-4.1446	-8.02875	-12.8592	4.89007	4.2518			mTA	23.4355	4.51893	15.331	6.6594	-7.38455
LTR	-0.986946	-23.4313	-14.9357	-8.8324	11.4333			Outcast	-3.12155	3.69553	-0.446015	-2.1038	-0.114459
SINE	-0.628544	13.0792	-3.00437	7.07795	-6.27842			P	1.04843	2.59327	-3.64252	-0.679885	1.43899
Undetermined	0.650771	1.98565	-0.333754	-0.113297	-1.01869			PIF-Harbinger	-0.808861	1.84767	2.13964	0.778948	-1.13533
								PiggyBac	0.464475	-1.67975	-1.97663	0.928789	1.04649
LBV88	exon	intron	upstream	downstream	intergenic			R1	-2.7882	3.49818	-8.20774	-1.50676	3.44429
p-value	0.000304077	4.17084e-242	2.58688e-145	3.45063e-33	5.60025e-53			RTE	-3.16999	-3.18341	-4.12754	16.4102	2.15736
DNA	2.68916	11.5377	16.126	-1.26568	-5.61121			Tc1-Mariner	3.58301	-2.38272	-0.431274	-3.66161	0.401816
LINE	-3.46349	-9.35516	-13.307	5.22539	4.66324			Transib	-1.91815	-0.996365	-0.931088	-1.5934	0.510599
LTR	-0.89405	-26.1359	-15.2674	-9.14557	12.2512			tSINE	-1.44804	-0.852387	15.5664	7.86979	-7.02979
SINE	-0.72075	14.8482	-2.64097	6.7593	-6.85144
Undetermined	-0.736727	-0.271584	0.558876	-0.156645	0.191635			DLA155B	upstream	exon	intron	downstream	intergenic
								p-value	9.77295e-186	3.3552e-43	3.94857e-232	9.63524e-81	1.13585e-44
LBV136	exon	intron	upstream	downstream	intergenic			Bel-Pao	-6.8676	2.70076	-13.3914	-4.75681	6.32834
p-value	0.00041407	2.79801e-185	2.61169e-144	3.18356e-28	5.83937e-43			CACTA	-3.53337	12.2366	-7.35695	-1.37424	2.49173
DNA	2.50352	9.22449	16.1207	-1.38936	-4.6742			Copia	-3.27682	-0.658497	-7.29415	-2.44578	3.64203
LINE	-3.56457	-8.09551	-13.4185	4.56576	4.22722			CR1	-8.93121	-4.01982	-5.99613	-2.26484	3.31253
LTR	-0.114106	-22.76	-14.8305	-8.30166	10.9783			Gambol	-5.25388	1.18935	1.10192	-1.79532	-0.650024
SINE	-1.1393	13.906	-3.42401	6.56175	-6.59696			Gypsy	-11.2716	-2.39446	-17.7625	-6.78457	8.94141
Undetermined	0.356408	-0.105882	1.12517	-0.577093	0.0184207			hAT	-4.11325	-0.275309	3.60185	-1.68747	-1.74343
								Helitron	-2.05241	-0.295884	0.226278	-0.757733	-0.0840098
LBV11	exon	intron	upstream	downstream	intergenic			I	-3.65478	-1.72661	-1.90997	-2.37854	1.09602
p-value	0.000231022	2.47404e-196	1.23731e-152	2.47127e-27	5.8648e-46			Jockey	-5.72902	-1.52896	-3.06859	-2.97653	1.64684
DNA	2.83957	9.62468	16.6751	-1.07343	-4.90097			L1	-1.68748	0.323978	-0.995785	-0.217249	0.459295
LINE	-3.2076	-8.43884	-13.6771	3.9231	4.36319			L2	-4.11999	-1.69522	-0.835357	-0.591738	0.565467
LTR	-1.03363	-23.5418	-15.0821	-8.34626	11.4437			Loner	-2.33923	-1.15883	0.226278	-1.45765	-0.0049684
SINE	-1.26793	13.9177	-4.32121	6.6863	-6.59249			m3bp	9.25507	-2.38748	6.36535	-3.97922	-2.90695
Undetermined	-0.813603	1.13422	-0.221267	0.116803	-0.471893			m4bp	2.81097	-1.90591	-0.528258	0.832635	0.433968
								m8bp	2.85818	-0.294057	7.91541	-0.000570995	-3.85984
AcolN1	exon	intron	upstream	downstream	intergenic			Maque	1.59091	0.40097	0.160003	-0.0408823	-0.115295
p-value	3.44374e-05	1.46795e-216	1.67975e-157	9.87177e-30	1.46572e-51			mTA	19.8458	2.93383	12.2703	5.84491	-6.29393
DNA	3.00686	9.2187	16.5787	-1.24491	-4.74648			Outcast	-2.77958	5.58413	-0.216712	-1.6391	-0.405066
LINE	-3.74141	-6.63087	-13.6038	4.49009	3.55838			P	2.54397	1.47127	-2.92238	-0.92376	1.30024
LTR	-1.39443	-25.5519	-16.016	-8.6099	12.5216			PIF-Harbinger	-0.615388	2.46342	3.25594	1.09196	-1.82443
SINE	-0.825782	14.9848	-3.69539	6.7657	-7.19297			PiggyBac	-0.455331	-1.58857	-1.82888	0.96173	1.04356
Undetermined	0.389989	-0.0246903	1.925	0.717667	-0.0236756			R1	-1.70034	3.11223	-7.32985	-0.320722	3.31418
								RTE	-3.42891	-3.05793	-2.85437	15.1878	1.6817
								Tc1-Mariner	4.4459	-2.21844	-0.4148	-3.81252	0.406881
								Transib	-1.81714	-0.952073	-1.57741	-1.92171	0.861773
								tSINE	-3.76433	-0.253432	12.4022	6.39888	-6.06673
								DLA146	upstream	exon	intron	downstream	intergenic
								p-value	4.78344e-219	1.14536e-29	7.84928e-238	1.36571e-90	4.15099e-45
								Bel-Pao	-8.58426	1.41874	-14.1325	-5.3101	6.71913
								CACTA	-4.01016	10.0264	-7.87563	-3.01495	2.93354
								Copia	-4.30103	-1.17796	-6.91204	-1.78273	3.45058
								CR1	-10.0444	-4.08612	-5.42127	-2.81782	2.98398
								Gambol	-4.59548	1.31489	1.63281	-0.568418	-0.906126
								Gypsy	-10.8973	-2.65917	-17.0344	-7.33329	8.48237
								hAT	-3.90768	-0.172723	4.07808	-0.529592	-1.95965
								Helitron	-1.48316	-0.307821	0.413389	0.608574	-0.17316
								I	-3.53776	-1.65416	-0.0274357	-0.641913	0.158509
								Jockey	-6.02339	-1.21543	-1.57336	-2.56884	0.868606
								L1	-1.45833	1.86226	-0.918473	-0.277542	0.28128
								L2	-3.14916	-1.65791	0.6968	-0.658908	-0.191875
								Loner	-2.32169	-1.16035	-0.306928	-1.46058	0.2505
								m3bp	9.30834	-1.76491	5.54141	-4.88566	-2.52849
								m4bp	3.53962	-1.38859	-1.06113	1.02033	0.63576
								m8bp	2.94907	0.0649043	8.98511	0.0336979	-4.35675
								Maque	-0.333754	0.650771	1.98565	-0.113297	-1.01869
								mTA	22.4867	3.97302	12.4469	4.42329	-6.37625
								Outcast	-3.23129	4.13746	-0.749222	-1.04883	-0.000425311
								P	2.28076	2.27966	-2.84164	0.562968	1.17593
								PIF-Harbinger	-1.53482	1.42301	2.50569	0.906716	-1.33831
								PiggyBac	-0.653087	-1.13089	-1.97133	1.07084	1.0539
								R1	-2.07046	1.27479	-6.71083	-1.43615	3.13781
								RTE	-2.8449	-3.35204	-4.38176	16.4873	2.41616
								Tc1-Mariner	4.68733	-1.85657	-0.0654637	-3.34325	0.194693
								Transib	-1.90072	-0.977506	-1.68247	-2.40887	0.900555
								tSINE	-3.00437	-0.628544	13.0792	7.07795	-6.27842
								LBV88	upstream	exon	intron	downstream	intergenic
								p-value	5.21518e-226	5.67259e-36	8.14636e-297	1.38823e-91	4.42162e-53
								Bel-Pao	-8.49864	1.27945	-16.2848	-4.893	7.47114
								CACTA	-3.47567	10.029	-7.86274	-2.04604	2.77499
								Copia	-4.78251	-0.426488	-6.67953	-2.91329	3.14855
								CR1	-10.4197	-4.32918	-7.60407	-2.47261	3.92426
								Gambol	-4.63945	2.76267	1.56593	-2.32874	-0.973606
								Gypsy	-11.4543	-2.64224	-19.3531	-7.8325	9.24691
								hAT	-3.70422	-1.81212	4.65446	-0.323526	-2.00745
								Helitron	-2.36872	-0.336918	0.355587	-0.845993	-0.135812
								I	-3.41847	-1.02702	-0.856055	-1.54565	0.489511
								Jockey	-5.7895	-0.910091	-1.52594	-1.79793	0.791155
								L1	-1.43316	2.62203	-0.66929	-1.24686	0.079832
								L2	-4.24818	-1.6396	-0.528118	-0.809524	0.390954
								Loner	-1.83426	-1.19062	-0.84793	-1.56275	0.500194
								m3bp	11.0136	-2.19197	5.85642	-4.91755	-2.53365
								m4bp	3.27216	-1.3964	-0.694165	0.158353	0.44678
								m8bp	2.73504	0.524846	10.2038	0.440346	-4.79861
								Maque	0.558876	-0.736727	-0.271584	-0.156645	0.191635
								mTA	22.5825	4.61304	14.0068	5.6997	-6.93128
								Outcast	-2.75137	3.90944	-0.154213	-0.498674	-0.273903
								P	0.110115	3.06908	-2.98614	-0.358271	1.11931
								PIF-Harbinger	-0.438866	1.51388	2.13916	-0.464921	-1.13014
								PiggyBac	-0.760431	-1.62077	-1.90321	2.39981	1.02971
								R1	-1.49679	3.41977	-6.70139	-0.548128	2.8186
								RTE	-3.65176	-3.36115	-3.90565	16.2238	2.1162
								Tc1-Mariner	2.93294	-2.15784	-0.569623	-3.23965	0.456114
								Transib	-1.93554	-0.994862	-0.65865	-2.03843	0.39473
								tSINE	-2.64097	-0.72075	14.8482	6.7593	-6.85144
								LBV136	upstream	exon	intron	downstream	intergenic
								p-value	2.45469e-221	4.25147e-34	1.45671e-235	3.27867e-82	3.36009e-43
								Bel-Pao	-8.49468	2.54653	-13.636	-5.32215	6.33809
								CACTA	-4.261	9.63571	-7.95151	-1.71902	2.95032
								Copia	-3.83343	-0.26507	-5.5719	-2.34061	2.70929
								CR1	-9.98154	-3.82038	-6.30187	-3.44281	3.38628
								Gambol	-4.94135	1.45682	0.545641	-1.74814	-0.396204
								Gypsy	-11.2735	-2.43744	-16.9477	-6.46007	8.38988
								hAT	-4.20007	-0.768502	3.99413	-0.835407	-1.85443
								Helitron	-3.02104	-0.373843	0.276704	-0.218071	-0.0991434
								I	-3.69193	-1.65281	-0.896952	-1.5559	0.583425
								Jockey	-6.68037	-1.90682	-1.16889	-1.96636	0.737704
								L1	-1.50375	1.02617	-0.648977	-0.623143	0.218865
								L2	-4.18999	-1.67912	-0.366631	-0.195127	0.330276
								Loner	-2.50574	-1.21539	0.313409	-0.944389	-0.0398496
								m3bp	9.33872	-2.46971	5.56992	-4.64571	-2.45817
								m4bp	3.12674	-1.91026	-1.31835	0.483973	0.810042
								m8bp	3.40818	0.349937	8.24272	0.837957	-4.0041
								Maque	1.12517	0.356408	-0.105882	-0.577093	0.0184207
								mTA	22.1109	3.53861	12.8407	5.17269	-6.51149
								Outcast	-2.67586	3.37865	-0.0596505	-1.11092	-0.280321
								P	2.58256	3.28443	-2.05958	0.231224	0.692043
								PIF-Harbinger	-0.127502	2.43086	2.19031	0.100374	-1.27785
								PiggyBac	-1.15265	-1.63205	-1.36666	-0.0866463	0.807873
								R1	-1.71423	5.02301	-6.79787	-0.146338	2.81634
								RTE	-3.26529	-3.1245	-3.734	15.8708	2.0852
								Tc1-Mariner	4.31709	-2.16791	-1.37581	-3.43414	0.861301
								Transib	-1.99999	-1.00921	-0.614098	-1.65164	0.388247
								tSINE	-3.42401	-1.1393	13.906	6.56175	-6.59696
								LBV11	upstream	exon	intron	downstream	intergenic
								p-value	2.31672e-242	7.18817e-36	3.90088e-247	2.72923e-88	3.71989e-46
								Bel-Pao	-8.50538	1.27093	-14.6594	-5.28029	6.94976
								CACTA	-4.50377	9.45476	-8.54044	-2.01123	3.24697
								Copia	-3.82007	-0.892757	-6.24222	-1.77536	3.09127
								CR1	-11.0886	-4.36598	-5.4267	-2.77335	3.01775
								Gambol	-4.68621	0.580875	1.29177	-2.35022	-0.676163
								Gypsy	-11.7097	-2.42869	-17.3468	-6.93054	8.58568
								hAT	-4.04481	-0.659907	3.65777	-0.101777	-1.70254
								Helitron	-2.70161	-1.30355	0.932558	-0.220305	-0.329595
								I	-3.85384	-1.74655	-2.1545	-1.53183	1.19932
								Jockey	-6.44795	-1.2969	-2.62923	-2.22328	1.38679
								L1	-1.75925	2.9379	-0.937353	-1.80232	0.181512
								L2	-3.69776	-1.70303	1.16658	-1.11456	-0.405646
								Loner	-2.47079	-1.24188	0.10384	-1.61586	0.064222
								m3bp	10.0692	-1.87317	6.11294	-4.6226	-2.77443
								m4bp	0.9682	-0.687126	1.34803	0.722483	-0.586602
								m8bp	5.53228	0.732304	8.47035	0.108495	-4.1506
								Maque	-0.221267	-0.813603	1.13422	0.116803	-0.471893
								mTA	22.9932	4.27884	12.5012	6.11072	-6.42008
								Outcast	-2.97344	3.4927	0.149127	-0.961481	-0.393289
								P	3.35502	2.21466	-2.497	-0.263047	0.999906
								PIF-Harbinger	-0.379031	2.72393	1.43763	1.07876	-0.943681
								PiggyBac	-0.833294	-1.28819	-1.78827	1.23101	0.980593
								R1	-1.68922	5.78359	-6.89654	-1.24535	2.79233
								RTE	-2.53195	-3.46256	-4.07988	15.849	2.28537
								Tc1-Mariner	3.91908	-2.30913	-1.00771	-3.55962	0.698266
								Transib	-1.94691	-0.0496816	-0.715141	-2.03893	0.349312
								tSINE	-4.32121	-1.26793	13.9177	6.6863	-6.59249
								AcolN1	upstream	exon	intron	downstream	intergenic
								p-value	5.56625e-264	2.21129e-30	1.87118e-300	8.55549e-94	3.48484e-60
								Bel-Pao	-9.88297	0.434655	-16.2312	-6.3878	7.83331
								CACTA	-4.4846	7.6627	-10.0014	-3.07918	4.15073
								Copia	-4.3666	-0.544873	-6.47901	-2.46937	3.1925
								CR1	-10.2105	-4.10267	-6.16784	-2.08214	3.36681
								Gambol	-5.47256	1.30758	-0.402532	-2.42765	0.0757161
								Gypsy	-11.413	-3.00209	-18.1481	-5.76696	9.07733
								hAT	-4.37136	-1.14141	4.24839	-0.969253	-1.95637
								Helitron	-2.36994	-0.541045	1.00207	-1.69886	-0.436599
								I	-3.70545	-1.84034	-2.18648	-2.61317	1.22881
								Jockey	-6.7154	-1.69187	-0.190993	-2.29891	0.247309
								L1	-1.88168	0.652352	-0.797859	-0.91508	0.327371
								L2	-4.36136	-1.80717	0.735746	-0.831904	-0.191672
								Loner	-2.08913	-1.23508	-0.602071	-1.10722	0.404947
								m3bp	9.7231	-1.18065	6.99293	-2.86238	-3.28404
								m4bp	3.1025	-1.27303	1.31815	-0.5149	-0.523001
								m8bp	5.96091	0.391853	8.25822	0.131394	-4.04153
								Maque	1.925	0.389989	-0.0246903	0.717667	-0.0236756
								mTA	24.6817	5.63173	13.9216	6.25905	-7.2676
								Outcast	-2.39949	5.95944	3.91191	-1.77514	-2.4423
								P	0.76703	1.6399	-4.81071	-1.82425	2.18355
								PIF-Harbinger	-1.13708	1.52161	2.58494	0.358335	-1.39295
								PiggyBac	-1.31551	-1.82273	-2.0267	1.2524	1.1497
								R1	-3.21203	3.68812	-7.14232	-2.11118	3.12728
								RTE	-2.60995	-3.5679	-2.89294	16.619	1.72941
								Tc1-Mariner	3.85147	-1.9647	-1.29311	-2.93369	0.806842
								Transib	-1.43591	-1.07821	-0.477091	-2.09339	0.329984
								tSINE	-3.69539	-0.825782	14.9848	6.7657	-7.19297
