# Supplementary material for: Transposable element variants and their potential adaptive impact in urban populations of the malaria vector Anopheles coluzzii
Source: HighWire-hosted journal article supplement (doi:10.1101/gr.275761.121), 2021-12-29
Supplement: Supplemental_Table_S6.xlsx [file Supplemental_Table_S6.xlsx]

## Sheet: S6. Transfer of breakpoints
Table S6. Inversion breakpoints in An. coluzzii. The known coordinates or the breakpoints of five inversions were transferred from the An. gambiae genome using the Corbett-Detig et al., 2019 reference. Given that the distal 2Ru breakpoint is shared with the 2Rc proximal and 2Rd distal we were able to include it as well but we did not take into consideration the proximal 2Ru given that the exact c…
			Coordinates
Breakpoint	Chromosome	Closest gene	AcolN1	DLA112	DLA146	DLA155B	LBV11	LBV88	LBV136	Reference
2La proximal left	2L	AGAP005778	29256836	25636107	25537144	23215945	-	23570533	-	Sharakov et al., 2006. Cloned and sequenced from An. gambiae, An. arabiensis and An. merus. Sequenced from An. melas and An. quadriannulatus. Fragments of an AMPLICON_AA repeat region, partial Merlin1_CB and HARBINGER1_AG transposons, and a nonautonomous SINEX-1_AG non-LTR retrotransposon.
2La proximal right	2L	AGAP029526	29257485	25636830	25538064	23216884	-	23571343	-
2La distal left	2L	AGAP007068	51362001	49030397	48334336	46189746	46259942	46828808	46189943
2La distal right	2L	AGAP007069	51362000	49030396	48334348	46189758	46259941	46828807	46189942
2Rb distal left	2R	AGAP028403	18976971	19704807	19376702	-	-	18946388	19353047	Lobo et al., 2010. Assessed but not cloned in An. gambiae and An. coluzzii. Repetitive structure comprising tandemly arrayed copies of unit length ~30 bp. TEs close by and the content appears to be similar in both species whether they display the inversion or not.
2Rb distal right	2R	AGAP002299	18976970	19704806	19376701	19334620	-	18946387	19353046
2Rb proximal left	2R	AGAP002757	26845068	-	-	-	-	-	-
2Rb proximal right	2R	AGAP002758	26845066	-	-	-	-	-	-
2Rc distal left	2R	AGAP002757	26845068	-	-	-	-	-	-
2Rc distal right	2R	AGAP002758	26845066	-	-	-	-	-	-
2Rc proximal left	2R	AGAP003052	31494061	-	-	-	-	-	-
2Rc proximal right	2R	AGAP003053	31493462	-	-	-	-	-	-
2Rd distal left	2R	AGAP003052	31495782	-	-	-	-	31570665	-	Mathiopoulos et al., 1998. Cloned from An. gambiae and An. arabiensis. Suggest that the inversion may be the result of the transposable elements activity. Found the TE at one of the breakpoint junctions in the two strains of An. arabiensis that carry the inversion. The TE is small with short TIRs.
2Rd distal right	2R	AGAP003053	31493462	-	-	-	-	31610254	-
2Rd proximal left	2R	AGAP003714	-	43049245	-	-	-	-	-
2Rd proximal right	2R	AGAP003715	-	43059540	-	-	-	-	-
2Ru distal left	2R	AGAP003052	31485199	-	-	-	-	-	-
2Ru distal right	2R	AGAP003053	31485198	-	-	-	-	-	-
