# Supplementary material for: Transposable element variants and their potential adaptive impact in urban populations of the malaria vector Anopheles coluzzii
Source: HighWire-hosted journal article supplement (doi:10.1101/gr.275761.121), 2021-12-29
Supplement: Supplemental_Table_S7.xlsx [file Supplemental_Table_S7.xlsx]

## Sheet: S7. Active TE families
Table S7. Identification and analysis of active TE families. A) Strains by dnaPipeTE refers to the number of strains where more than 50% of the insertions are >99% identical to the consensus according to dnaPipeTE. Identical using BLAST is the median percentage of insertions >99% identical to the consensus in all seven strains. Strains with >2 identical FL is the number of strains with more than …
A)
Family	Strains by dnaPipeTE	Identical using BLAST	Strains with >2 identical FL	Left side LTR	Right side LTR	ORF1	ORF2	TSD	Comments
Acol_copia_Ele24	6	0.6755	7	1..134	2064..2197	Reverse transcriptase (173..2014)		5 bp long	Reverse transcriptase seems to be functional although the TE is shorter than usual.
Acol_copia_Ele10	6	0.4221	7	1..182	4173..4354	Reverse transcriptase (207..4130)		5 bp long	Reverse transcriptase seems to be functional.
Acol_R1_Ele10	6	0.397	6			GAG (598..1788)	Reverse transcriptase (1791..4817)	~13 bp long	Reverse transcriptase seems to be functional. R1 elements insert in 28S regions so they are surrounded by repeats.
Acol_CR1_Ele7	5	0.2446	7			ORF (326..1321)	Reverse transcriptase (1360..4239)	Members of the CR1 superfamily don't appear to leave TSD	Reverse transcriptase with several nonsense mutations.
Acol_gypsy_Ele65	5	0.4833	7	1..141	4468..4608	Reverse transcriptase (221..4450)		5 bp long	Reverse transcriptase seems to be functional
Acol_copia_Ele8	5	0.6043	7	1..239	4257..4495	Reverse transcriptase (364..4221)		5 bp long	Reverse transcriptase seems to be functional
Acol_Pao_Bel_Ele8	5	0.6045	6	1..267	5630..5896	Reverse transcriptase (455..5599)		5 bp long	Reverse transcriptase seems to be functional
Acol_gypsy_Ele18	5	0.4312	6	1..233	4641..4873	Reverse transcriptase (494..4585)		~5 bp long	Reverse transcriptase seems to be functional
B)
Family	Acol_copia_Ele24	Acol_copia_Ele8	Acol_gypsy_Ele65	Acol_copia_Ele10	Acol_Pao_Bel_Ele8	Acol_gypsy_Ele18
Total number of LTR pairs	68	46	76	57	34	48
Mean identity of LTR pairs	98.23	99.36	99.29	99.44	97.38	99.13
Number of identical LTR pairs	14	15	29	23	6	13
Percentage of identical LTRs	20.58	32.6	38.15	40.35	17.64	27.08
