# Supplementary material for: Transposable element variants and their potential adaptive impact in urban populations of the malaria vector Anopheles coluzzii
Source: HighWire-hosted journal article supplement (doi:10.1101/gr.275761.121), 2021-12-29
Supplement: Supplemental_Table_S8.xlsx [file Supplemental_Table_S8.xlsx]

## Sheet: S8. Insertions from active fam
Table S8. TE insertions from active families in proximity of genes. A) Presence or absence of the active insertions by genome is shown. B) Genes with TE insertions from active families. In yellow the six genes selected for further analysis. Status refers to whether the insertion(s) found on each of the genes is (are) fixed, polymorphic or found on a single genome.
A)
gene_region_family	DLA112	DLA155B	DLA146	LBV88	LBV136	LBV11	AcolN1	Number of genomes
AGAP000319_intron_Acol_Pao_Bel_Ele8	Absent	Absent	Absent	Present	Present	Absent	Absent	2
AGAP000368_intron_Acol_copia_Ele24	Absent	Absent	Absent	Absent	Absent	Absent	Present	1
AGAP000531_downstream_Acol_copia_Ele24	Present	Present	Present	Present	Present	Present	Present	7
AGAP000707_downstream_Acol_gypsy_Ele65	Present	Present	Present	Present	Present	Present	Present	7
AGAP000741_intron_Acol_Pao_Bel_Ele8	Present	Present	Present	Present	Present	Present	Present	7
AGAP000894_intron_Acol_copia_Ele24	Present	Absent	Absent	Absent	Absent	Absent	Absent	1
AGAP001079_downstream_Acol_R1_Ele10	Absent	Absent	Absent	Present	Absent	Absent	Absent	1
AGAP001882_intron_Acol_copia_Ele10	Absent	Absent	Absent	Absent	Absent	Present	Absent	1
AGAP002100_downstream_Acol_Pao_Bel_Ele8	Present	Present	Present	Present	Present	Present	Present	7
AGAP002100_downstream_Acol_R1_Ele10	Present	Present	Present	Present	Present	Present	Present	7
AGAP002628_intron_Acol_gypsy_Ele18	Absent	Absent	Absent	Absent	Absent	Absent	Present	1
AGAP002633_downstream_Acol_gypsy_Ele18	Absent	Absent	Absent	Absent	Absent	Present	Absent	1
AGAP002916_intron_Acol_gypsy_Ele18	Present	Absent	Absent	Absent	Absent	Absent	Absent	1
AGAP003244_intron_Acol_gypsy_Ele18	Absent	Present	Absent	Absent	Absent	Absent	Absent	1
AGAP003305_intron_Acol_gypsy_Ele18	Absent	Absent	Absent	Absent	Absent	Absent	Present	1
AGAP003649_intron_Acol_copia_Ele10	Absent	Absent	Absent	Present	Absent	Absent	Absent	1
AGAP003676_upstream_Acol_gypsy_Ele65	Absent	Present	Absent	Present	Absent	Absent	Present	3
AGAP003931_intron_Acol_gypsy_Ele65	Absent	Present	Absent	Absent	Absent	Absent	Absent	1
AGAP004039_intron_Acol_Pao_Bel_Ele8	Absent	Absent	Absent	Present	Absent	Absent	Absent	1
AGAP004353_intron_Acol_gypsy_Ele65	Absent	Present	Absent	Absent	Absent	Absent	Present	2
AGAP004369_downstream_Acol_Pao_Bel_Ele8	Absent	Absent	Present	Present	Present	Present	Present	5
AGAP004724_intron_Acol_copia_Ele10	Absent	Absent	Absent	Present	Present	Present	Absent	3
AGAP005076_intron_Acol_gypsy_Ele65	Absent	Absent	Absent	Present	Absent	Absent	Absent	1
AGAP005165_intron_Acol_Pao_Bel_Ele8	Absent	Present	Absent	Present	Absent	Absent	Absent	2
AGAP005464_intron_Acol_copia_Ele24	Absent	Absent	Absent	Absent	Absent	Present	Absent	1
AGAP005773_intron_Acol_copia_Ele24	Absent	Absent	Absent	Absent	Absent	Absent	Present	1
AGAP005806_intron_Acol_gypsy_Ele18	Absent	Absent	Absent	Present	Absent	Absent	Absent	1
AGAP005816_intron_Acol_gypsy_Ele18	Present	Absent	Absent	Absent	Absent	Absent	Absent	1
AGAP006330_intron_Acol_gypsy_Ele18	Present	Absent	Present	Present	Absent	Absent	Absent	3
AGAP006721_intron_Acol_gypsy_Ele18	Absent	Absent	Present	Absent	Absent	Absent	Absent	1
AGAP007137_intron_Acol_gypsy_Ele65	Present	Absent	Absent	Absent	Absent	Absent	Absent	1
AGAP007760_upstream_Acol_gypsy_Ele18	Present	Present	Present	Present	Present	Present	Present	7
AGAP008009_intron_Acol_gypsy_Ele65	Absent	Absent	Absent	Absent	Absent	Present	Absent	1
AGAP008190_intron_Acol_Pao_Bel_Ele8	Absent	Absent	Absent	Absent	Absent	Absent	Present	1
AGAP008535_intron_Acol_gypsy_Ele18	Absent	Absent	Absent	Absent	Absent	Present	Absent	1
AGAP008535_intron_Acol_R1_Ele10	Absent	Absent	Absent	Absent	Absent	Present	Absent	1
AGAP008944_intron_Acol_copia_Ele10	Present	Present	Present	Present	Present	Present	Present	7
AGAP009112_intron_Acol_Pao_Bel_Ele8	Absent	Absent	Absent	Absent	Absent	Absent	Present	1
AGAP009158_intron_Acol_copia_Ele10	Absent	Absent	Absent	Absent	Absent	Present	Absent	1
AGAP009668_upstream_Acol_gypsy_Ele65	Absent	Absent	Present	Absent	Absent	Present	Absent	2
AGAP009774_intron_Acol_copia_Ele24	Absent	Present	Absent	Absent	Absent	Absent	Absent	1
AGAP009972_intron_Acol_copia_Ele10	Present	Absent	Absent	Absent	Absent	Absent	Absent	1
AGAP010008_intron_Acol_copia_Ele10	Absent	Absent	Absent	Absent	Absent	Present	Absent	1
AGAP010620_intron_Acol_gypsy_Ele65	Absent	Absent	Present	Absent	Absent	Present	Present	3
AGAP010626_upstream_Acol_gypsy_Ele65	Absent	Absent	Present	Absent	Absent	Absent	Absent	1
AGAP010850_intron_Acol_copia_Ele24	Absent	Absent	Absent	Present	Absent	Absent	Present	2
AGAP010922_intron_Acol_Pao_Bel_Ele8	Present	Absent	Absent	Absent	Absent	Present	Absent	2
AGAP011094_intron_Acol_gypsy_Ele18	Absent	Absent	Absent	Present	Absent	Present	Absent	2
AGAP011360_intron_Acol_gypsy_Ele18	Absent	Present	Absent	Absent	Absent	Absent	Absent	1
AGAP011379_intron_Acol_copia_Ele24	Present	Absent	Absent	Absent	Absent	Absent	Absent	1
AGAP011379_intron_Acol_R1_Ele10	Absent	Absent	Present	Absent	Absent	Absent	Absent	1
AGAP011794_upstream_Acol_copia_Ele24	Absent	Absent	Absent	Absent	Absent	Absent	Present	1
AGAP011916_intron_Acol_gypsy_Ele18	Absent	Absent	Absent	Absent	Absent	Present	Absent	1
AGAP012092_upstream_Acol_copia_Ele8	Present	Present	Present	Present	Present	Absent	Present	6
AGAP012093_upstream_Acol_copia_Ele8	Present	Present	Absent	Present	Present	Present	Absent	5
AGAP012316_intron_Acol_copia_Ele10	Absent	Absent	Absent	Absent	Absent	Present	Absent	1
AGAP012466_intron_Acol_copia_Ele24	Absent	Absent	Present	Present	Absent	Present	Present	4
AGAP012466_intron_Acol_copia_Ele8	Absent	Absent	Present	Absent	Absent	Absent	Present	2
AGAP012484_intron_Acol_gypsy_Ele18	Present	Absent	Present	Absent	Absent	Present	Present	4
AGAP012916_downstream_Acol_gypsy_Ele65	Present	Present	Present	Present	Present	Present	Present	7
AGAP013057_intron_Acol_copia_Ele8	Absent	Absent	Absent	Present	Absent	Absent	Absent	1
AGAP013228_downstream_Acol_gypsy_Ele65	Absent	Present	Absent	Absent	Absent	Absent	Absent	1
AGAP028069_upstream_Acol_gypsy_Ele65	Absent	Absent	Absent	Absent	Absent	Present	Absent	1
AGAP028449_intron_Acol_gypsy_Ele18	Absent	Absent	Absent	Absent	Present	Absent	Absent	1
AGAP029185_upstream_Acol_gypsy_Ele65	Absent	Absent	Present	Absent	Absent	Absent	Absent	1
AGAP029191_intron_Acol_gypsy_Ele18	Absent	Absent	Absent	Absent	Present	Absent	Absent	1
AGAP029293_intron_Acol_gypsy_Ele65	Absent	Present	Absent	Absent	Absent	Absent	Absent	1
AGAP029551_intron_Acol_copia_Ele10	Absent	Absent	Absent	Absent	Absent	Present	Absent	1
AGAP029565_intron_Acol_gypsy_Ele65	Absent	Absent	Absent	Present	Absent	Absent	Absent	1
AGAP029620_intron_Acol_gypsy_Ele65	Absent	Absent	Absent	Present	Absent	Absent	Absent	1
B)
Number of genomes with insertions in the gene	Number of genomes where the gene was completely or partially transferred	Number of genomes where the gene was correctly transferred	Status	Gene ID	Gene name	Description	eggNOG free text description	COG Functional Category	Superfamily Description	Smart Description	PFam Description	Curated GO Processes	Curated GO Functions	Curated GO Components	EC numbers from OrthoMCL
2	7	7	Polymorphic	AGAP000319	KATNB1	katanin p80 WD40 repeat-containing subunit	Participates in a complex which severs microtubules in an ATP-dependent manner. May act to target the enzymatic subunit of this complex to sites of action such as the centrosome. Microtubule severing may promote rapid reorganization of cellular microtubule arrays and the release of microtubules from the centrosome following nucleation	Cytoskeleton	WD40-repeat-containing domain superfamily	WD40 repeat	WD40 repeat;Katanin p80 subunit, C-terminal	microtubule depolymerization	microtubule-severing ATPase activity	katanin complex	4.1.1.65 (Phosphatidylserine decarboxylase)
1	7	6	Single	AGAP000368		PI-3-kinase-related kinase SMG-1	FATC	Replication and repair	Armadillo-type fold;Protein kinase-like domain superfamily	Phosphatidylinositol 3-/4-kinase, catalytic domain;FATC domain	Phosphatidylinositol 3-/4-kinase, catalytic domain;FATC domain;Serine/threonine-protein kinase SMG1	nuclear-transcribed mRNA catabolic process, nonsense-mediated decay	protein serine/threonine kinase activity	nucleus	2.7.11.1 (Non-specific serine/threonine protein kinase)
7	7	7	Fixed	AGAP000531		lipoyl(octanoyl) transferase	Catalyzes the transfer of endogenously produced octanoic acid from octanoyl-acyl-carrier-protein onto the lipoyl domains of lipoate-dependent enzymes. Lipoyl-ACP can also act as a substrate although octanoyl-ACP is likely to be the physiological substrate	Coenzyme metabolism	-	-	Biotinyl protein ligase (BPL) and lipoyl protein ligase (LPL), catalytic domain	protein lipoylation	lipoyl(octanoyl) transferase activity	mitochondrion	2.3.1.181 (Lipoyl(octanoyl) transferase)
7	7	5	Fixed	AGAP000707			PWWP domain	Function Unknown	-	PWWP domain;Methyl-CpG DNA binding	PWWP domain	-	chromatin binding	chromocenter;nucleus	-
7	7	7	Fixed	AGAP000741					-	-	-	-	-	-	-
1	7	4	Single	AGAP000894			Large family of predicted nucleotide-binding domains	RNA processing and modification	Tetratricopeptide-like helical domain superfamily;PIN-like domain superfamily	PIN domain	DNA/RNA-binding domain, Est1-type;Telomerase activating protein Est1;PIN domain	nuclear-transcribed mRNA catabolic process, nonsense-mediated decay;regulation of telomere maintenance via telomerase;telomere maintenance via telomerase	telomerase RNA binding;telomeric DNA binding	cytoplasm;telomerase holoenzyme complex	-
1	7	6	Single	AGAP001079					-	-	-	-	-	-	-
1	7	7	Single	AGAP001882	elgi	E3 ubiquitin-protein ligase NRDP1	USP8 interacting	Post-translational modification, protein turnover, chaperone functions	NRDP1, C-terminal;TRAF-like	Zinc finger, RING-type	E3 ubiquitin-protein ligase NRDP1	-	-	-	2.3.2.27 (RING-type E3 ubiquitin transferase)
7	7	7	Fixed	AGAP002100			HEAT repeat-containing protein	Function Unknown	Armadillo-type fold	-	-	cilium movement;inner dynein arm assembly;outer dynein arm assembly	dynein intermediate chain binding	cytoplasm	-
1	7	6	Single	AGAP002628		opioid binding protein/cell adhesion molecule-like	Fibronectin type 3 domain	Signal Transduction	Immunoglobulin-like domain superfamily;Fibronectin type III superfamily	Immunoglobulin subtype 2;Immunoglobulin subtype	Immunoglobulin I-set	homophilic cell adhesion via plasma membrane adhesion molecules;synapse organization	axon guidance receptor activity	axon;neuronal cell body;plasma membrane	-
1	7	7	Single	AGAP002633	Gr53	gustatory receptor 53	Gustatory receptor which mediates acceptance or avoidance behavior, depending on its substrates	Lipid metabolism	-	-	7TM chemoreceptor	chemosensory behavior;male courtship behavior;response to carbon dioxide;sensory perception of bitter taste	taste receptor activity	axon;dendrite;neuronal cell body	-
1	7	6	Single	AGAP002916					-	-	-	-	-	-	-
1	7	4	Single	AGAP003244	GPRGHP2	putative growth hormone releasing hormone receptor 2	Belongs to the G-protein coupled receptor 1 family	Signal Transduction	-	G protein-coupled receptor, rhodopsin-like	G protein-coupled receptor, rhodopsin-like	-	-	-	-
1	7	6	Single	AGAP003305			CD80-like C2-set immunoglobulin domain	Signal Transduction	Immunoglobulin-like domain superfamily	Immunoglobulin subtype 2;Immunoglobulin subtype	CD80-like, immunoglobulin C2-set	-	-	-	-
1	7	7	Single	AGAP003649			Zinc finger protein	Function Unknown	AN1-like Zinc finger	Zinc finger, AN1-type;Zinc finger, A20-type	Zinc finger, AN1-type;Zinc finger, A20-type	-	-	-	-
3	7	7	Polymorphic	AGAP003676	rad50	DNA repair protein RAD50	DNA repair protein RAD50	Replication and repair	P-loop containing nucleoside triphosphate hydrolase	-	RAD50, zinc hook;Rad50/SbcC-type AAA domain	DNA duplex unwinding;chromosome organization involved in meiotic cell cycle;nucleic acid phosphodiester bond hydrolysis;telomere capping;telomere maintenance via recombination;telomere maintenance via telomerase	3'-5' exonuclease activity;DNA helicase activity;G-quadruplex DNA binding;adenylate kinase activity;double-stranded telomeric DNA binding;single-stranded DNA endodeoxyribonuclease activity;single-stranded telomeric DNA binding	Mre11 complex;condensed nuclear chromosome;nuclear chromatin;nuclear chromosome, telomeric region;site of double-strand break	3.6.-.- (Acting on acid anhydrides.)
1	7	7	Single	AGAP003931			Ras family	Function Unknown	P-loop containing nucleoside triphosphate hydrolase	-	Small GTPase	Cdc42 protein signal transduction;Rho protein signal transduction;actin cytoskeleton organization;actin filament organization;cell migration;cell projection assembly;cortical cytoskeleton organization;endocytosis;establishment or maintenance of cell polarity;regulation of actin cytoskeleton organiza	GTP binding;GTPase activity;protein kinase binding	cell cortex;cell projection;cytoplasm;cytoplasmic vesicle;cytoskeleton;intracellular membrane-bounded organelle;plasma membrane	-
1	7	6	Single	AGAP004039	cno	afadin	DIL	Cytoskeleton	SMAD/FHA domain superfamily;PDZ superfamily;Ubiquitin-like domain superfamily	PDZ domain;Ras-associating (RA) domain;Dilute domain	Forkhead-associated (FHA) domain;PDZ domain;Ras-associating (RA) domain;Dilute domain	-	-	-	-
2	7	7	Polymorphic	AGAP004353		dual specificity phosphatase	Dual specificity	Defense mechanisms	Protein-tyrosine phosphatase-like	Dual specificity protein phosphatase domain	Dual specificity phosphatase, catalytic domain	inactivation of MAPK activity	protein tyrosine/serine/threonine phosphatase activity	cytoplasm	3.1.3.16 (Protein-serine/threonine phosphatase)
5	7	7	Polymorphic	AGAP004369		Beat IIb	heterophilic cell-cell adhesion via plasma membrane cell adhesion molecules	Function Unknown	-	-	-	motor neuron axon guidance	-	-	-
3	7	4	Polymorphic	AGAP004724		Intraflagellar transport 74 homolog	beta-tubulin binding	Function Unknown	-	-	-	intraciliary transport;intraciliary transport involved in cilium assembly	beta-tubulin binding	centrosome;cilium;intraciliary transport particle B	-
1	7	6	Single	AGAP005076		bridging integrator	BAR	Intracellular trafficing and secretion	AH/BAR domain superfamily;SH3-like domain superfamily	SH3 domain;BAR domain	BAR domain;SH3 domain	-	phospholipid binding	plasma membrane	-
2	7	7	Polymorphic	AGAP005165			Laminin G domain	Post-translational modification, protein turnover, chaperone functions	Concanavalin A-like lectin/glucanase domain superfamily	EGF-like calcium-binding domain;EGF-like domain;Laminin G domain	EGF-like domain;Laminin G domain;Laminin G domain	animal organ morphogenesis;dendrite development;motor neuron axon guidance;tissue development	-	basement membrane	-
1	7	6	Single	AGAP005464	GPRDIH1	putative diuretic insect hormone receptor 1	7 transmembrane receptor (Secretin family)	Signal Transduction	GPCR family 2, extracellular hormone receptor domain superfamily	GPCR, family 2, extracellular hormone receptor domain	GPCR, family 2, secretin-like;GPCR, family 2, extracellular hormone receptor domain	-	peptide hormone binding	-	-
1	7	5	Single	AGAP005773		guanine nucleotide-binding protein G(o) subunit alpha	G protein alpha subunit	Cell cycle control and mitosis, Signal Transduction	G protein alpha subunit, helical insertion;P-loop containing nucleoside triphosphate hydrolase	Guanine nucleotide binding protein (G-protein), alpha subunit	Guanine nucleotide binding protein (G-protein), alpha subunit	-	-	-	3.6.1.15 (Nucleoside-triphosphate phosphatase)
1	7	7	Single	AGAP005806			nucleoside triphosphate catabolic process	Lipid metabolism	-	-	-	-	phosphoric diester hydrolase activity	extracellular space	3.6.1.10 (Endopolyphosphatase)
1	7	6	Single	AGAP005816		BAI1-associated protein 3	Protein kinase C conserved region 2 (CalB)	Signal Transduction, Intracellular trafficing and secretion	-	C2 domain	C2 domain	-	-	-	-
3	7	7	Polymorphic	AGAP006330		Ccdc109a	Mitochondrial calcium uniporter	Function Unknown	-	-	Calcium uniporter protein, C-terminal	calcium import into the mitochondrion;mitochondrial calcium ion homeostasis	calcium channel activity;uniporter activity	integral component of mitochondrial inner membrane;uniplex complex	-
1	7	6	Single	AGAP006721			Domain of unknown function (DUF4808)	Function Unknown	Fibronectin type III superfamily	-	Fibronectin type III domain-containing protein 5, C-terminal domain	-	-	-	-
1	7	6	Single	AGAP007137			Sterile alpha motif.	Function Unknown	Sterile alpha motif/pointed domain superfamily	Sterile alpha motif domain	Sterile alpha motif domain;Sterile alpha motif domain	-	-	-	-
7	7	7	Fixed	AGAP007760			peptidase activity	Function Unknown	-	-	-	-	-	-	3.4.-.- (Acting on peptide bonds (peptidases).)
1	7	7	Single	AGAP008009		RYK receptor-like tyrosine kinase	WIF domain	Signal Transduction	Protein kinase-like domain superfamily	WIF domain	WIF domain;Serine-threonine/tyrosine-protein kinase, catalytic domain	axonogenesis;multicellular organism development;nervous system development;positive regulation of kinase activity;transmembrane receptor protein tyrosine kinase signaling pathway	-	integral component of plasma membrane;receptor complex	2.7.10.1 (Receptor protein-tyrosine kinase)
1	7	7	Single	AGAP008190	Gli	Gliotactin	Carboxylesterase family	Lipid metabolism	Alpha/Beta hydrolase fold	-	Carboxylesterase, type B	chemical synaptic transmission;modulation of chemical synaptic transmission;neuron cell-cell adhesion;postsynaptic membrane assembly;presynaptic membrane assembly;synaptic vesicle endocytosis	neurexin family protein binding;signaling receptor activity	cell surface;integral component of plasma membrane;synapse	3.1.1.- (Carboxylic ester hydrolases.)
1	7	7	Single	AGAP008535			Dedicator of cytokinesis protein 9	Signal Transduction	-	Pleckstrin homology domain	Pleckstrin homology domain;Dedicator of cytokinesis, C-terminal;Dedicator of cytokinesis C/D, N-terminal;DHR-1 domain	-	-	-	-
7	7	6	Fixed	AGAP008944	oaf		Out at first protein	Function Unknown	-	-	Out at first protein	-	-	-	-
1	7	5	Single	AGAP009112			O-linked n-acetylglucosamine transferase	Function Unknown	Tetratricopeptide-like helical domain superfamily	Tetratricopeptide repeat	Tetratricopeptide repeat 1;Tetratricopeptide repeat 2;Domain of unknown function DUF1736;Glycosyltransferase RgtA/B/C/D-like;MalT-like TPR region	-	-	-	2.4.1.109 (Dolichyl-phosphate-mannose--protein mannosyltransferase)
1	7	6	Single	AGAP009158	Vkr	Guanylate cyclase	Tyrosine kinase, catalytic domain	Signal Transduction	Periplasmic binding protein-like I;Protein kinase-like domain superfamily	Tyrosine-protein kinase, catalytic domain	Receptor, ligand binding region;Serine-threonine/tyrosine-protein kinase, catalytic domain	multicellular organism development;nervous system development;positive regulation of MAPK cascade;positive regulation of kinase activity;positive regulation of neuron projection development;positive regulation of phosphatidylinositol 3-kinase signaling;regulation of MAPK cascade;transmembrane recept	transmembrane receptor protein tyrosine kinase activity	integral component of plasma membrane;receptor complex	4.6.1.2 (Guanylate cyclase)
2	7	7	Polymorphic	AGAP009668		lysosomal-associated membrane protein 1/2	Lysosome-associated membrane glycoprotein (Lamp)	Function Unknown	-	-	Lysosome-associated membrane glycoprotein	establishment of protein localization to organelle	-	late endosome membrane;lysosomal membrane;plasma membrane	-
1	7	7	Single	AGAP009774			dDENN domain	Signal Transduction	-	cDENN domain;uDENN domain;dDENN domain	cDENN domain;dDENN domain;uDENN domain	endocytic recycling;endocytosis	Rab GTPase binding;Rab guanyl-nucleotide exchange factor activity;phosphatidylinositol phosphate binding	cytosol;intracellular membrane-bounded organelle	2.7.11.1 (Non-specific serine/threonine protein kinase)
1	7	7	Single	AGAP009972		MON2 homolog	C-terminal region of Mon2 protein	Intracellular trafficing and secretion	Armadillo-type fold	-	Sec7, C-terminal;Guanine nucleotide exchange factor, N-terminal;Mon2, C-terminal;Mon2, dimerisation and cyclophilin-binding domain	-	-	-	-
1	7	7	Single	AGAP010008		PI-PLC X domain-containing protein 3	phosphoric diester hydrolase activity. It is involved in the biological process described with	Signal Transduction	PLC-like phosphodiesterase, TIM beta/alpha-barrel domain superfamily	Phosphatidylinositol-specific phospholipase C, X domain	-	-	-	-	4.6.1.14 (Glycosylphosphatidylinositol diacylglycerol-lyase)
3	3	3	Fixed	AGAP010620		Early trypsin	Belongs to the peptidase S1 family	Post-translational modification, protein turnover, chaperone functions	Peptidase S1, PA clan	Serine proteases, trypsin domain	Serine proteases, trypsin domain	-	serine-type endopeptidase activity;serine-type peptidase activity	-	-
1	7	7	Single	AGAP010626	PAN2	PAB-dependent poly(A)-specific ribonuclease subunit 2	Catalytic subunit of the poly(A)-nuclease (PAN) deadenylation complex, one of two cytoplasmic mRNA deadenylases involved in general and miRNA-mediated mRNA turnover. PAN specifically shortens poly(A) tails of RNA and the activity is stimulated by poly(A)-binding protein (PABP). PAN deadenylation is followed by rapid degradation of the shortened mRNA tails by the CCR4-NOT complex. Deadenylated mRN…	Replication and repair	WD40-repeat-containing domain superfamily;Ribonuclease H-like superfamily;Papain-like cysteine peptidase superfamily	Exonuclease, RNase T/DNA polymerase III	Exonuclease, RNase T/DNA polymerase III;PAN2 domain	nuclear-transcribed mRNA poly(A) tail shortening	poly(A)-specific ribonuclease activity	P-body;PAN complex	3.1.13.4 (Poly(A)-specific ribonuclease)
2	7	6	Polymorphic	AGAP010850		fatty acyl-CoA reductase	Catalyzes the reduction of fatty acyl-CoA to fatty alcohols	Lipid metabolism	NAD(P)-binding domain superfamily	-	Fatty acyl-CoA reductase, C-terminal;Male sterility, NAD-binding	long-chain fatty-acyl-CoA metabolic process	fatty-acyl-CoA reductase (alcohol-forming) activity	intracellular membrane-bounded organelle;peroxisome	1.2.1.84 (Alcohol-forming fatty acyl-CoA reductase)
2	7	6	Polymorphic	AGAP010922		transcription factor SOX1/3/14/21 (SOX group B)	high mobility group	Transcription	High mobility group box domain superfamily	High mobility group box domain	High mobility group box domain	anatomical structure morphogenesis;cell differentiation;regulation of transcription, DNA-templated	DNA-binding transcription factor activity, RNA polymerase II-specific	nuclear transcription factor complex;nucleus	-
2	7	7	Polymorphic	AGAP011094			Immunoglobulin	Intracellular trafficing and secretion	Immunoglobulin-like domain superfamily	Immunoglobulin subtype 2;Immunoglobulin subtype	-	-	-	-	-
1	7	6	Single	AGAP011360	ARRK	Arrestin kurtz-like	Beta-arrestin 1	Signal Transduction	Immunoglobulin E-set	Arrestin C-terminal-like domain	Arrestin-like, N-terminal;Arrestin C-terminal-like domain	G protein-coupled receptor internalization	G protein-coupled receptor binding	cytoplasm	-
2	7	6	Single	AGAP011379	GPRFZ1	Frizzled receptor	Frizzled	Signal Transduction	Frizzled cysteine-rich domain superfamily	Frizzled domain;Frizzled/Smoothened, transmembrane domain	Frizzled domain;Frizzled/Smoothened, transmembrane domain	canonical Wnt signaling pathway	Wnt-activated receptor activity;Wnt-protein binding	integral component of membrane;plasma membrane	-
1	6	6	Single	AGAP011794		CLIPA1 protein	Belongs to the peptidase S1 family	Post-translational modification, protein turnover, chaperone functions	Peptidase S1, PA clan	Serine proteases, trypsin domain	Serine proteases, trypsin domain;PPAF-2, Clip domain	proteolysis	serine-type endopeptidase activity	extracellular space	-
1	7	7	Single	AGAP011916	COEB6582	carboxylesterase	Carboxylesterase family	Lipid metabolism	Alpha/Beta hydrolase fold	-	Carboxylesterase, type B	chemical synaptic transmission;modulation of chemical synaptic transmission;neuron cell-cell adhesion;postsynaptic membrane assembly;presynaptic membrane assembly;synaptic vesicle endocytosis	neurexin family protein binding;signaling receptor activity	cell surface;integral component of plasma membrane;synapse	-
7	7	7	Fixed	AGAP012092					P-loop containing nucleoside triphosphate hydrolase	-	-	-	-	-	-
5	7	6	Polymorphic	AGAP012093			It is involved in the biological process described with metabolic process activity	Lipid metabolism	-	-	AMP-dependent synthetase/ligase;AMP-binding enzyme, C-terminal domain	-	-	-	6.2.1.3 (Long-chain-fatty-acid--CoA ligase)
1	7	6	Single	AGAP012316					-	-	-	-	-	-	-
4	7	4	Fixed/Polymorphic	AGAP012466	CPR146	cuticular protein RR-2 family 146	Insect cuticle protein	Function Unknown	-	-	Insect cuticle protein	-	-	extracellular matrix	-
4	4	4	Fixed	AGAP012484			DDE superfamily endonuclease	Replication and repair	-	-	Harbinger transposase-derived nuclease domain	-	-	-	-
7	7	6	Fixed	AGAP012916			Fibrinogen and fibronectin	Cell cycle control and mitosis	Fibrinogen-like, C-terminal	Fibrinogen, alpha/beta/gamma chain, C-terminal globular domain	Fibrinogen, alpha/beta/gamma chain, C-terminal globular domain	-	-	-	-
1	7	5	Single	AGAP013057			NACHT domain	Function Unknown	-	-	-	-	-	-	-
1	7	6	Single	AGAP013228	Hsp67Bb	heat shock protein 67B2	Rhodanese Homology Domain	Inorganic ion transport and metabolism	Rhodanese-like domain superfamily	Rhodanese-like domain	Rhodanese-like domain	-	-	-	2.8.1.1 (Thiosulfate sulfurtransferase)
1	3	2	Single	AGAP028069			Belongs to the peptidase S1 family	Post-translational modification, protein turnover, chaperone functions	Peptidase S1, PA clan	Serine proteases, trypsin domain	Serine proteases, trypsin domain	-	-	-	-
1	7	7	Single	AGAP028449					-	-	-	-	-	-	-
1	7	6	Single	AGAP029185			Starch/carbohydrate-binding module (family 53)	Post-translational modification, protein turnover, chaperone functions, Signal Transduction	-	-	CBM21 (carbohydrate binding type-21) domain	-	-	-	-
2	7	6	Single	AGAP029191	dpr12	defective proboscis extension response 12	Immunoglobulin V-set domain	Signal Transduction	Immunoglobulin-like domain superfamily	Immunoglobulin subtype 2;Immunoglobulin subtype	Immunoglobulin I-set	synapse organization	-	neuron projection membrane	-
1	7	6	Single	AGAP029293					-	-	-	-	-	-	-
1	7	6	Single	AGAP029551			Tyrosine protein kinase with ig domain	Inorganic ion transport and metabolism, Signal Transduction, Intracellular trafficing and secretion	Immunoglobulin-like domain superfamily;Protein kinase-like domain superfamily	Immunoglobulin subtype 2;Immunoglobulin subtype	Immunoglobulin I-set;Serine-threonine/tyrosine-protein kinase, catalytic domain	axis elongation;establishment of planar polarity	-	cell-cell junction	2.7.10.1 (Receptor protein-tyrosine kinase)
1	7	7	Single	AGAP029565	Cka		Striatin family	Cell cycle control and mitosis	WD40-repeat-containing domain superfamily	WD40 repeat	WD40 repeat;Striatin, N-terminal	-	-	-	-
1	7	6	Single	AGAP029620			Thrombospondin type 1 repeats	Extracellular structures	Thrombospondin type-1 (TSP1) repeat superfamily;Somatomedin B-like domain superfamily	Thrombospondin type-1 (TSP1) repeat	Thrombospondin type-1 (TSP1) repeat	-	-	-	-
