# Supplementary material for: Transposable element variants and their potential adaptive impact in urban populations of the malaria vector Anopheles coluzzii
Source: HighWire-hosted journal article supplement (doi:10.1101/gr.275761.121), 2021-12-29
Supplement: Supplemental_Table_S9.xlsx [file Supplemental_Table_S9.xlsx]

## Sheet: S9. TFBS and promoter motifs
Table S9. Transcription factor binding sites (TFBS) and promoter prediction for TEs belonging to the active families and insecticide resistance genes. A) Position and score for each identified binding site of the transcription factors cnc:mafS, dl and Stat92E. B) Summary of the TFBS identified per genome. C) Promoter motifs in the TE insertions in genes involved in insecticide resistance and in i…
A)									B)
motif_alt_id	Group	sequence_name	start	stop	strand	score	p-value		Motif	TE	Group	Gene	DLA112	DLA155B	DLA146	LBV88	LBV136	LBV11	AcolN1
Stat92E	Active families	AGAP011094_LBV11_Acol_gypsy_Ele18_1	3884	3898	-	15.1053	4.95e-06		Stat92E	gypsy_Ele18	Active families	AGAP011094	0	0	0	2	0	3	0
Stat92E	Active families	AGAP011094_LBV11_Acol_gypsy_Ele18_1	3018	3032	-	12.75	2.4e-05		Stat92E	-	Active families	AGAP011094	2	4	2	1	2	1	2
Stat92E	Active families	AGAP011094_LBV11_Acol_gypsy_Ele18_1	2082	2096	-	10.1184	8.96e-05		dl	gypsy_Ele18	Active families	AGAP011094	0	0	0	2	0	2	0
dl	Active families	AGAP011094_LBV11_Acol_gypsy_Ele18_1	2521	2532	-	15.2828	2.84e-06		dl	-	Active families	AGAP011094	1	1	0	1	0	0	1
dl	Active families	AGAP011094_LBV11_Acol_gypsy_Ele18_1	3453	3464	-	11.596	4.93e-05		Stat92E	copia_Ele8	Active families	AGAP012466	-	-	0	0	-	0	5
Stat92E	Active families	AGAP011094_LBV88_Acol_gypsy_Ele18_1	2077	2091	-	14.3289	8.85e-06		dl	copia_Ele8	Active families	AGAP012466	-	-	0	0	-	0	3
Stat92E	Active families	AGAP011094_LBV88_Acol_gypsy_Ele18_1	3012	3026	-	12.75	2.4e-05		dl	-	Active families	AGAP012466	-	-	1	1	-	1	1
dl	Active families	AGAP011094_LBV88_Acol_gypsy_Ele18_1	2516	2527	-	15.2828	2.84e-06		cnc::maf-S	-	Active families	AGAP012466	-	-	1	1	-	1	1
dl	Active families	AGAP011094_LBV88_Acol_gypsy_Ele18_1	3446	3457	-	11.596	4.93e-05		Stat92E	gypsy_Ele18	Active families	AGAP012484	1	-	1	-	-	1	1
Stat92E	Active families	AGAP011094_AcolN1_9	680	694	-	12.2632	3.15e-05		dl	-	Active families	AGAP012484	1	-	1	-	-	1	1
Stat92E	Active families	AGAP011094_AcolN1_9	654	668	+	10.0132	9.39e-05		Stat92E	gypsy_Ele18	Active families	AGAP029191	7	0	0	0	3	0	0
Stat92E	Active families	AGAP011094_DLA112_7	681	695	-	13.6842	1.37e-05		dl	gypsy_Ele18	Active families	AGAP029191	6	0	0	0	1	0	0
Stat92E	Active families	AGAP011094_DLA112_7	690	704	-	10.8289	6.49e-05		Stat92E	copia_Ele10	Active families	AGAP029551	0	0	0	0	0	1	0
Stat92E	Active families	AGAP011094_DLA146_8	682	696	-	13.6842	1.37e-05		dl	-	Active families	AGAP029551	0	0	0	0	1	0	0
Stat92E	Active families	AGAP011094_DLA146_8	691	705	-	10.8289	6.49e-05		cnc::maf-S	CR1_Ele9	Insecticide Resistance	AGAP004707	1	1	0	1	1	1	1
Stat92E	Active families	AGAP011094_DLA155B_7	682	696	-	13.6842	1.37e-05		cnc::maf-S	mTA_Ele21	Insecticide Resistance	AGAP004707	1	1	1	1	1	1	1
Stat92E	Active families	AGAP011094_DLA155B_7	657	671	+	13.5132	1.53e-05		cnc::maf-S	Pao_Bel_Ele59	Insecticide Resistance	AGAP005834	2	0	0	0	0	0	0
Stat92E	Active families	AGAP011094_DLA155B_7	661	675	-	12.3816	2.95e-05		cnc::maf-S	-	Insecticide Resistance	AGAP005834	0	1	1	1	1	1	1
Stat92E	Active families	AGAP011094_DLA155B_7	691	705	-	10.8289	6.49e-05		cnc::maf-S	PIF_Ele8	Insecticide Resistance	AGAP010414	0	1	0	0	1	0	0
Stat92E	Active families	AGAP011094_LBV11_8	682	696	-	13.4605	1.58e-05		cnc::maf-S	otherMITEs_Eles16	Insecticide Resistance	AGAP013121	0	0	0	-	0	0	1
Stat92E	Active families	AGAP011094_LBV136_8	682	696	-	13.6842	1.37e-05		cnc::maf-S	CR1_Ele7	Insecticide Resistance	AGAP013121	0	0	1	-	0	0	0
Stat92E	Active families	AGAP011094_LBV136_8	691	705	-	10.8289	6.49e-05		cnc::maf-S	gypsy_Ele16	Insecticide Resistance	AGAP013121	0	0	1	-	0	0	0
Stat92E	Active families	AGAP011094_LBV88_7	679	693	-	14.75	6.55e-06		cnc::maf-S	gypsy_Ele28	Insecticide Resistance	AGAP013121	0	0	1	-	0	0	0
dl	Active families	AGAP011094_AcolN1_9	107	118	+	12.7071	2.44e-05		cnc::maf-S	RTE_Ele2	Insecticide Resistance	AGAP013121	0	0	1	-	0	0	0
dl	Active families	AGAP011094_DLA112_7	94	105	+	11.2626	6.24e-05		cnc::maf-S	CR1_Ele3	Insecticide Resistance	AGAP013121	0	1	0	-	0	0	0
dl	Active families	AGAP011094_DLA155B_7	96	107	+	11.2626	6.24e-05		cnc::maf-S	CR1_Ele31	Insecticide Resistance	AGAP013121	0	1	0	-	0	0	0
dl	Active families	AGAP011094_LBV88_7	92	103	+	11.2626	6.24e-05		cnc::maf-S	Tc1-mar_Ele2	Insecticide Resistance	AGAP013121	0	1	0	-	0	0	0
Stat92E	Active families	AGAP012466_AcolN1_Acol_copia_Ele8_14	2379	2393	-	14.7105	6.72e-06
Stat92E	Active families	AGAP012466_AcolN1_Acol_copia_Ele8_14	792	806	-	13.1974	1.85e-05
Stat92E	Active families	AGAP012466_AcolN1_Acol_copia_Ele8_14	2375	2389	+	11.6053	4.44e-05		C)
Stat92E	Active families	AGAP012466_AcolN1_Acol_copia_Ele8_14	992	1006	-	11.5921	4.47e-05		Gene	AcolN1	DLA112	DLA146	DLA155B	LBV11	LBV88	LBV136
Stat92E	Active families	AGAP012466_AcolN1_Acol_copia_Ele8_14	898	912	-	9.98684	9.5e-05		AGAP011794	Acol_copia_Ele24	-	-	-	-	-	-
dl	Active families	AGAP012466_AcolN1_Acol_copia_Ele8_14	1420	1431	+	11.8889	4.03e-05
dl	Active families	AGAP012466_AcolN1_Acol_copia_Ele8_14	2846	2857	+	11.5859	5.03e-05		AGAP000163	-	Acol_m3bp_Ele11	Acol_m3bp_Ele11	-	-	Acol_m3bp_Ele11	-
dl	Active families	AGAP012466_AcolN1_Acol_copia_Ele8_14	1421	1432	+	11.2424	6.3e-05			Acol_tSINE_Ele1	Acol_tSINE_Ele1	Acol_tSINE_Ele1	Acol_tSINE_Ele1	Acol_tSINE_Ele1	Acol_tSINE_Ele1	Acol_tSINE_Ele1
cnc::maf-S	Active families	AGAP012466_LBV11_6	169	183	-	10.5909	8.39e-05		AGAP000500	-	Acol_mTA_Ele31	Acol_mTA_Ele31	Acol_mTA_Ele31	-	-	Acol_mTA_Ele31
cnc::maf-S	Active families	AGAP012466_LBV88_1	169	183	-	10.5909	8.39e-05			Acol_Tc1-mar_Ele10	Acol_Tc1-mar_Ele10	Acol_Tc1-mar_Ele10	Acol_Tc1-mar_Ele10	Acol_Tc1-mar_Ele10	Acol_Tc1-mar_Ele10	Acol_Tc1-mar_Ele10
cnc::maf-S	Active families	AGAP012466_AcolN1_2	170	184	-	10.5909	8.39e-05			Acol_m3bp_Ele11	-	-	-	Acol_m3bp_Ele11	Acol_m3bp_Ele11	-
cnc::maf-S	Active families	AGAP012466_DLA146_1	171	185	-	10.5909	8.39e-05		AGAP002866	Acol_tSINE_Ele1	Acol_tSINE_Ele1	Acol_tSINE_Ele1	Acol_tSINE_Ele1	Acol_tSINE_Ele1	-	Acol_tSINE_Ele1
dl	Active families	AGAP012466_AcolN1_2	473	484	+	11.0808	6.92e-05		AGAP004163	Acol_m3bp_Ele15	-	-	-	-	-	-
dl	Active families	AGAP012466_DLA146_1	473	484	+	11.0808	6.92e-05		AGAP004382	Acol_tSINE_Ele1	Acol_tSINE_Ele1	Acol_tSINE_Ele1	-	-	Acol_tSINE_Ele1	Acol_tSINE_Ele1
dl	Active families	AGAP012466_LBV11_6	472	483	+	11.0808	6.92e-05		AGAP004707	Acol_mTA_Ele16	Acol_mTA_Ele16	Acol_mTA_Ele16	Acol_mTA_Ele16	Acol_mTA_Ele16	Acol_mTA_Ele16	-
dl	Active families	AGAP012466_LBV88_1	472	483	+	11.0808	6.92e-05			Acol_P_Ele7	-	Acol_P_Ele7	-	Acol_P_Ele7	-	-
Stat92E	Active families	AGAP012484_AcolN1_Acol_gypsy_Ele18_15	410	424	+	11.25	5.3e-05			-	-	-	-	-	-	Acol_mTA_Ele1
Stat92E	Active families	AGAP012484_DLA112_Acol_gypsy_Ele18_16	410	424	+	11.25	5.3e-05			-	-	-	-	-	-	Acol_CR1_Ele13
Stat92E	Active families	AGAP012484_DLA146_Acol_gypsy_Ele18_16	14	28	+	11.25	5.3e-05		AGAP005749	Acol_m3bp_Ele24	-	-	-	-	-	-
Stat92E	Active families	AGAP012484_LBV11_Acol_gypsy_Ele18_4	175	189	-	11.25	5.3e-05			-	Acol_PIF_Ele1	Acol_PIF_Ele1	-	-	Acol_PIF_Ele1	Acol_PIF_Ele1
dl	Active families	AGAP012484_AcolN1_5	830	841	+	10.5657	9.06e-05		AGAP005834	-	Acol_Pao_Bel_Ele59	-	-	-	-	-
dl	Active families	AGAP012484_DLA112_9	830	841	+	10.5657	9.06e-05		AGAP008213	-	-	-	-	Acol_Tc1-mar_Ele8	-	Acol_Tc1-mar_Ele8
dl	Active families	AGAP012484_DLA146_10	830	841	+	10.5657	9.06e-05			-	-	-	-	-	Acol_RTE_Ele2	-
dl	Active families	AGAP012484_LBV11_10	830	841	+	10.5657	9.06e-05		AGAP009946	Acol_otherMITEs_Eles16	Acol_otherMITEs_Eles16	Acol_otherMITEs_Eles16	Acol_otherMITEs_Eles16	Acol_otherMITEs_Eles16	Acol_otherMITEs_Eles16	Acol_otherMITEs_Eles16
Stat92E	Active families	AGAP029191_DLA112_Acol_gypsy_Ele18_16	974	988	+	15.1053	4.95e-06		AGAP011518	Acol_m2bp_Ele10	Acol_m2bp_Ele10	Acol_m2bp_Ele10	Acol_m2bp_Ele10	-	Acol_m2bp_Ele10	Acol_m2bp_Ele10
Stat92E	Active families	AGAP029191_DLA112_Acol_gypsy_Ele18_16	1841	1855	+	12.75	2.4e-05			-	-	-	-	Acol_mTA_Ele29	-	-
Stat92E	Active families	AGAP029191_DLA112_Acol_gypsy_Ele18_16	1760	1774	+	10.6053	7.2e-05		AGAP013121	-	-	-	-	-	Acol_CR1_Ele31	-
Stat92E	Active families	AGAP029191_DLA112_Acol_gypsy_Ele18_16	2786	2800	+	10.1184	8.96e-05
dl	Active families	AGAP029191_DLA112_Acol_gypsy_Ele18_16	2343	2354	+	15.2828	2.84e-06
dl	Active families	AGAP029191_DLA112_Acol_gypsy_Ele18_16	1408	1419	+	12.1313	3.44e-05
dl	Active families	AGAP029191_DLA112_Acol_gypsy_Ele18_16	1409	1420	+	11.303	5.99e-05
Stat92E	Active families	AGAP029191_DLA112_Acol_gypsy_Ele18_52	975	989	+	15.1053	4.95e-06
Stat92E	Active families	AGAP029191_DLA112_Acol_gypsy_Ele18_52	2785	2799	+	13.3684	1.67e-05
Stat92E	Active families	AGAP029191_DLA112_Acol_gypsy_Ele18_52	1848	1862	+	12.75	2.4e-05
dl	Active families	AGAP029191_DLA112_Acol_gypsy_Ele18_52	1414	1425	+	12.1313	3.44e-05
dl	Active families	AGAP029191_DLA112_Acol_gypsy_Ele18_52	1415	1426	+	11.303	5.99e-05
dl	Active families	AGAP029191_DLA112_Acol_gypsy_Ele18_52	2349	2360	+	10.8586	7.74e-05
Stat92E	Active families	AGAP029191_LBV136_Acol_gypsy_Ele18_4	974	988	+	15.1053	4.95e-06
Stat92E	Active families	AGAP029191_LBV136_Acol_gypsy_Ele18_4	1839	1853	+	12.75	2.4e-05
Stat92E	Active families	AGAP029191_LBV136_Acol_gypsy_Ele18_4	2773	2787	+	10.1184	8.96e-05
dl	Active families	AGAP029191_LBV136_Acol_gypsy_Ele18_4	1407	1418	+	11.596	4.93e-05
Stat92E	Active families	AGAP029551_LBV11_Acol_copia_Ele10_21	550	564	+	10.25	8.45e-05
dl	Active families	AGAP029551_LBV136_9	176	187	-	10.7374	8.16e-05
cnc::maf-S	Insecticide Resistance	AGAP004707_AcolN1_Acol_CR1_Ele9_30	575	589	+	10.3333	9.52e-05
cnc::maf-S	Insecticide Resistance	AGAP004707_AcolN1_Acol_mTA_Ele21_35	254	268	+	11.5152	5.44e-05
cnc::maf-S	Insecticide Resistance	AGAP004707_DLA112_Acol_CR1_Ele9_28	608	622	+	10.3333	9.52e-05
cnc::maf-S	Insecticide Resistance	AGAP004707_DLA112_Acol_mTA_Ele21_33	259	273	+	11.5152	5.44e-05
cnc::maf-S	Insecticide Resistance	AGAP004707_DLA146_Acol_mTA_Ele21_34	256	270	+	11.5152	5.44e-05
cnc::maf-S	Insecticide Resistance	AGAP004707_DLA155B_Acol_CR1_Ele9_28	608	622	+	10.3333	9.52e-05
cnc::maf-S	Insecticide Resistance	AGAP004707_DLA155B_Acol_mTA_Ele21_33	259	273	+	11.5152	5.44e-05
cnc::maf-S	Insecticide Resistance	AGAP004707_LBV11_Acol_CR1_Ele9_29	608	622	+	10.3333	9.52e-05
cnc::maf-S	Insecticide Resistance	AGAP004707_LBV11_Acol_mTA_Ele21_34	259	273	+	11.5152	5.44e-05
cnc::maf-S	Insecticide Resistance	AGAP004707_LBV136_Acol_CR1_Ele9_42	353	367	-	10.3333	9.52e-05
cnc::maf-S	Insecticide Resistance	AGAP004707_LBV136_Acol_mTA_Ele21_37	61	75	-	11.5152	5.44e-05
cnc::maf-S	Insecticide Resistance	AGAP004707_LBV88_Acol_CR1_Ele9_28	608	622	+	10.3333	9.52e-05
cnc::maf-S	Insecticide Resistance	AGAP004707_LBV88_Acol_mTA_Ele21_33	261	275	+	11.5152	5.44e-05
cnc::maf-S	Insecticide Resistance	AGAP005834_DLA112_Acol_Pao_Bel_Ele59_1	1720	1734	+	10.2424	9.93e-05
cnc::maf-S	Insecticide Resistance	AGAP005834_DLA112_Acol_Pao_Bel_Ele59_1	5370	5384	-	10.7424	7.79e-05
cnc::maf-S	Insecticide Resistance	AGAP005834_DLA146_3	16	30	-	13.6515	1.52e-05
cnc::maf-S	Insecticide Resistance	AGAP005834_AcolN1_3	19	33	-	13.6515	1.52e-05
cnc::maf-S	Insecticide Resistance	AGAP005834_LBV88_2	19	33	-	13.6515	1.52e-05
cnc::maf-S	Insecticide Resistance	AGAP005834_LBV136_1	20	34	-	13.6515	1.52e-05
cnc::maf-S	Insecticide Resistance	AGAP005834_LBV11_2	21	35	-	13.6515	1.52e-05
cnc::maf-S	Insecticide Resistance	AGAP005834_DLA155B_2	46	60	-	13.6515	1.52e-05
cnc::maf-S	Insecticide Resistance	AGAP010414_DLA155B_Acol_PIF_Ele8_5	180	194	-	11.7424	4.83e-05
cnc::maf-S	Insecticide Resistance	AGAP010414_LBV136_Acol_PIF_Ele8_8	182	196	-	11.7424	4.83e-05
cnc::maf-S	Insecticide Resistance	AGAP013121_AcolN1_Acol_otherMITEs_Eles16_1	316	330	+	10.3788	9.32e-05
cnc::maf-S	Insecticide Resistance	AGAP013121_DLA146_Acol_CR1_Ele7_25	352	366	+	11.8333	4.59e-05
cnc::maf-S	Insecticide Resistance	AGAP013121_DLA146_Acol_gypsy_Ele16_17	91	105	-	14.8182	6.29e-06
cnc::maf-S	Insecticide Resistance	AGAP013121_DLA146_Acol_gypsy_Ele28_19	119	133	+	10.2424	9.93e-05
cnc::maf-S	Insecticide Resistance	AGAP013121_DLA146_Acol_RTE_Ele2_16	1112	1126	+	12.4545	3.28e-05
cnc::maf-S	Insecticide Resistance	AGAP013121_DLA155B_Acol_CR1_Ele3_13	1879	1893	-	12.1364	3.88e-05
cnc::maf-S	Insecticide Resistance	AGAP013121_DLA155B_Acol_CR1_Ele31_10	4002	4016	-	12.1364	3.88e-05
cnc::maf-S	Insecticide Resistance	AGAP013121_DLA155B_Acol_Tc1-mar_Ele2_11	2876	2890	-	12.1364	3.88e-05
