# Supplementary material for: Transposable element variants and their potential adaptive impact in urban populations of the malaria vector Anopheles coluzzii
Source: HighWire-hosted journal article supplement (doi:10.1101/gr.275761.121), 2021-12-29
Supplement: Supplemental_Table_S10.xlsx [file Supplemental_Table_S10.xlsx]

## Sheet: S10. TEs in insecticide genes
Table S10. TEs in genes which are differentially expressed upon exposure to insecticides. In yellow eight genes well-known to be involved in insecticide response.
Transcript ID	TE status	Description	Number of insertions	TE insertions	Upstream	First intron	Reference
AGAP000163	polymorphic/fixed	GSTMS2	2	All have one upstream insertion but DLA112, DLA146 and LBV88 have an additional insertion	Yes	No	Fossog Tene, 2013
AGAP000500	polymorphic/fixed	NADPH P450 reductase	8	Several insertions in all, LBV11 is missing a downstream insertion	Yes	Yes	Fossog Tene, 2013
AGAP000818	polymorphic/fixed	CYP9K1	3	Two downstream insertions in all but LBV136 which only has one	No	No	Fossog Tene, 2013; Bamou, 2019
AGAP001076	-	CYP4G16	0	No TE insertions	No	No	Bamou, 2019
AGAP001356	-	ACE1	0	No TE insertions	No	No
AGAP002417	-	CYP4AR1	0	No TE insertions	No	No	Fossog Tene, 2013
AGAP002419	polymorphic	CYP4D22	2	All but AcolN1 have two downstream insertions	No	No	Fossog Tene, 2013
AGAP002862	-	CYP6AA1	0	No TE insertions	No	No	Fossog Tene, 2013
AGAP002863	-	COEAE6O	0	No TE insertions	No	No	Fossog Tene, 2013
AGAP002865	-	CYP6P3	0	No TE insertions	No	No	Fossog Tene, 2013; Adolfi, 2019; Bamou, 2019
AGAP002866	polymorphic	CYP6P5	1	Upstream insertion in all but LBV88	Yes	No	Fossog Tene, 2013
AGAP002867	polymorphic	CYP6P4	1	Downstream insertion in all but LBV88	No	No	Fossog Tene, 2013; Bamou, 2019
AGAP002868	-	CYP6P1	0	No TE insertions	No	No	Bamou, 2019
AGAP004163	polymorphic/single	GSTD7	2	Intronic insertion in DLA146, LBV136 and LBV11, upstream insertion in AcolN1	Yes	No	Fossog Tene, 2013
AGAP004164	single	GSTD1-3, GSTD1-4	1	Downstream insertion in LBV11	No	No	Fossog Tene, 2013
AGAP004380	-	GSTD1-6	0	No TE insertions, gene not completely reconstructed in LBV genomes and AcolN1	No	No	Fossog Tene, 2013
AGAP004382	polymorphic	GSTD3	1	Upstream insertions in all but DLA155B and LBV11	Yes	No	Fossog Tene, 2013
AGAP004707	polymorphic/fixed/single	para	48	Large number of TE insertions in all genomes	Yes	No
AGAP005749	polymorphic	GSTO1	1	Upstream insertions in all but DLA155B and LBV11	Yes	No	Fossog Tene, 2013
AGAP005753	-	glucosyl glucuronosyl transferases	0	No TE insertions	No	No	Fossog Tene, 2013
AGAP005756	-	COEAE1D	0	No TE insertions	No	No	Fossog Tene, 2013
AGAP005834	single	COEJHE2E	1	Insertion disrupting DLA112, missing first exon. Intronic and downstream insertion in AcolN1	No	Yes	Fossog Tene, 2013
AGAP005837	-	COEJHE5E	0	No TE insertions	No	No	Fossog Tene, 2013
AGAP006028	polymorphic/fixed/single	Rdl	4	Two fixed insertions and one polymorphic in all genomes except LBV11 which has a single insertion	No	Yes
AGAP006228	-	COEAE2F	0	No TE insertions	No	No	Fossog Tene, 2013
AGAP006364	single	ABCB4	1	Intronic insertion in LBV136	No	No	Fossog Tene, 2013
AGAP006379	-	ABCA1	0	No TE insertions	No	No	Fossog Tene, 2013
AGAP006726	-	COEAE5G	0	No TE insertions	No	No	Main, 2018
AGAP007588	-	glucosyl glucuronosyl transferases	0	No TE insertions	No	No	Fossog Tene, 2013; Main, 2018
AGAP007990	-	glucosyl glucuronosyl transferases	0	No TE insertions	No	No	Fossog Tene, 2013
AGAP008212	polymorphic	CYP6M2	1	Downstream insertion in all genomes from LBV	No	No	Fossog Tene, 2013; Adolfi, 2019; Bamou, 2019
AGAP008213	polymorphic	CYP6M3	1	Upstream insertion in all genomes from LBV	Yes	No	Fossog Tene, 2013
AGAP008217	-	CYP6Z3	0	No TE insertions	No	No	Fossog Tene, 2013
AGAP008218	-	CYP6Z2	0	No TE insertions	No	No	Fossog Tene, 2013
AGAP008219	-	CYP6Z1	0	No TE insertions	No	No	Main, 2018; Bamou, 2019
AGAP008437	-	ABCC8	0	No TE insertions	No	No	Fossog Tene, 2013
AGAP009194	fixed	GSTE2	1	Exonic insertion in all genomes. Does not affect coding sequence.	No	No	Adolfi, 2019; Bamou, 2019
AGAP009946	fixed	GSTMS3	1	Upstream insertion in all genomes	Yes	No	Fossog Tene, 2013
AGAP010414	polymorphic/fixed	CYP4C28	6	Several shared insertions in all genomes	No	Yes	Fossog Tene, 2013
AGAP011518	polymorphic/fixed	ABCA4	2	Intronic insertion in AcolN1, shared downstream insertions	Yes	Yes	Fossog Tene, 2013
AGAP012293	-	CYP9L3	0	No TE insertions	No	No	Fossog Tene, 2013
AGAP012296	-	CYP9J5	0	No TE insertions	No	No	Fossog Tene, 2013
AGAP013121	polymorphic/fixed/single	glucosyl glucuronosyl transferases	10	Large number of TE insertions in all genomes. Incomplete gene structure in LBV88.	No	No	Fossog Tene, 2013
