# Supplementary material for: Transposable element variants and their potential adaptive impact in urban populations of the malaria vector Anopheles coluzzii
Source: HighWire-hosted journal article supplement (doi:10.1101/gr.275761.121), 2021-12-29
Supplement: Supplemental_Table_S11.xlsx [file Supplemental_Table_S11.xlsx]

## Sheet: S11. TE freq. in rural pop.
Table S11. TE frequency estimation in rural populations using PopoolationTE2. A) Accesion number of the 37 genomes from Burkina Faso and the 30 genomes from Cote d'Ivoire analyzed. B) Frequency of the 59 TE insertions located inside or nearby insecticide-related genes in the Burkina Faso (BF) and Cote d'Ivoire (CI) populations and in our genomes. In red frequencies below 10%. C) Frequency of the …
A)			B)					C)
ENA sample accesion	Country		TE id	BF frequencies (37)	CI frequencies (30)	Our frequencies (7)		TE id	BF frequencies (37)	CI frequencies (30)	Our frequencies (7)
ERS223843	Burkina Faso		Acol_CR1_Ele31_56619	0	0	1		Acol_copia_Ele12_10468	0.555556	0.566667	1
ERS223971	Burkina Faso		Acol_gypsy_Ele59_2459	0.962963	0.733333	1		Acol_copia_Ele21_17692	0	0.0333333	1
ERS224030	Burkina Faso		Acol_gypsy_Ele85_56702	0	0	1		Acol_copia_Ele27_9175	0.666667	0.5	1
ERS223844	Burkina Faso		Acol_hAT_Ele11_8281	0.925926	1	1		Acol_copia_Ele4_16711	0.0740741	0	1
ERS223977	Burkina Faso		Acol_L2_Ele5_32360	0.37037	0.1	1		Acol_CR1_Ele13_19362	0	0	1
ERS224031	Burkina Faso		Acol_m3bp_Ele11_25508	0.407407	0.133333	1		Acol_CR1_Ele19_39709	0	0	1
ERS223861	Burkina Faso		Acol_m8bp_Ele6_36923	0	0	1		Acol_CR1_Ele20_24488	0	0	1
ERS223984	Burkina Faso		Acol_mTA_Ele19_47486	0	0	1		Acol_CR1_Ele20_39857	0	0	1
ERS224043	Burkina Faso		Acol_mTA_Ele24_38499	0	0	1		Acol_CR1_Ele22_1510	1	1	1
ERS223873	Burkina Faso		Acol_mTA_Ele29_34810	0	0.0666667	1		Acol_CR1_Ele23_17979	0	0	1
ERS223991	Burkina Faso		Acol_mTA_Ele3_36919	0	0	1		Acol_CR1_Ele23_35120	0	0	1
ERS224044	Burkina Faso		Acol_otherMITEs_Eles12_38500	0	0	1		Acol_CR1_Ele23_39504	0	0	1
ERS223909	Burkina Faso		Acol_otherMITEs_Eles12_57847	0	0	1		Acol_CR1_Ele23_39505	0	0	1
ERS223994	Burkina Faso		Acol_otherMITEs_Eles16_45331	0	0	1		Acol_CR1_Ele29_16710	0.0740741	0.1	1
ERS224045	Burkina Faso		Acol_otherMITEs_Eles16_56616	0	0	1		Acol_CR1_Ele3_8449	0.888889	0.233333	1
ERS223922	Burkina Faso		Acol_otherMITEs_Eles19_56620	0	0	1		Acol_CR1_Ele3_8450	0.851852	0.566667	1
ERS223999	Burkina Faso		Acol_otherMITEs_Eles8_32361	0.111111	0	1		Acol_CR1_Ele30_30024	0	0	1
ERS224056	Burkina Faso		Acol_Outcast_Ele2_56701	0	0	1		Acol_CR1_Ele31_24074	0	0	1
ERS223923	Burkina Faso		Acol_Outcast_Ele5_65650	0	0	1		Acol_CR1_Ele31_30023	0	0	1
ERS224009	Burkina Faso		Acol_P_Ele6_36924	0	0	1		Acol_CR1_Ele4_21143	0	0	1
ERS224057	Burkina Faso		Acol_P_Ele7_32362	0.0740741	0.0333333	1		Acol_CR1_Ele4_37329	0	0	1
ERS223925	Burkina Faso		Acol_Pao_Bel_Ele43_6256	0.962963	0.433333	1		Acol_CR1_Ele5_21146	0	0	1
ERS224013	Burkina Faso		Acol_PIF_Ele1_134	0.962963	0.966667	1		Acol_CR1_Ele7_14436	0.185185	0.133333	1
ERS224064	Burkina Faso		Acol_PIF_Ele6_32363	0.0740741	0.0333333	1		Acol_CR1_Ele7_17223	0.037037	0	1
ERS223933	Burkina Faso		Acol_PIF_Ele8_38501	0	0	1		Acol_gambol_Ele11_5450	1	0.733333	1
ERS224015	Burkina Faso		Acol_piggyBac_Ele5_52947	0	0	1		Acol_gambol_Ele12_20604	0	0	1
ERS224065	Burkina Faso		Acol_piggyBac_Ele5_8282	0.888889	0.766667	1		Acol_gambol_Ele12_8577	0.740741	0.366667	1
ERS223749	Burkina Faso		Acol_Tc1-mar_Ele10_47484	0	0	1		Acol_gambol_Ele2_4115	1	0.933333	1
ERS223936	Burkina Faso		Acol_Tc1-mar_Ele10_54899	0	0	1		Acol_gypsy_Ele26_5958	0.962963	0.933333	1
ERS224020	Burkina Faso		Acol_tSINE_Ele1_37637	0	0	1		Acol_gypsy_Ele35_2675	1	1	1
ERS224078	Burkina Faso		Acol_tSINE_Ele1_64971	0	0	1		Acol_gypsy_Ele40_568	1	1	1
ERS223761	Burkina Faso		Acol_tSINE_Ele1_65651	0	0	1		Acol_gypsy_Ele47_14317	0.222222	0.733333	1
ERS223938	Burkina Faso		Acol_tSINE_Ele2_18501	0.740741	0.1	1		Acol_gypsy_Ele61_12533	0.333333	0.2	1
ERS224021	Burkina Faso		Acol_tSINE_Ele2_47485	0	0	1		Acol_gypsy_Ele67_27569	0	0	1
ERS223794	Burkina Faso		Acol_CR1_Ele13_56622	0	0	0.857143		Acol_gypsy_Ele68_24036	0	0	1
ERS223941	Burkina Faso		Acol_CR1_Ele31_56623	0	0	0.857143		Acol_gypsy_Ele8_27544	0	0	1
ERS224023	Burkina Faso		Acol_m2bp_Ele1_16629	0.111111	0.233333	0.857143		Acol_gypsy_Ele85_20356	0	0	1
ERS311791	Côte d'Ivoire		Acol_m3bp_Ele11_25636	0	0	0.857143		Acol_gypsy_Ele85_27570	0	0	1
ERS311816	Côte d'Ivoire		Acol_mTA_Ele12_25839	0	0	0.857143		Acol_gypsy_Ele85_7011	0.962963	0.766667	1
ERS311848	Côte d'Ivoire		Acol_otherMITEs_Eles16_21012	0	0	0.857143		Acol_hAT_Ele11_29842	0	0	1
ERS311792	Côte d'Ivoire		Acol_otherMITEs_Eles24_19118	0.037037	0.0333333	0.857143		Acol_hAT_Ele12_15596	0.148148	0	1
ERS311817	Côte d'Ivoire		Acol_Pao_Bel_Ele59_6552	1	1	0.857143		Acol_hAT_Ele12_5122	1	0.8	1
ERS311849	Côte d'Ivoire		Acol_Tc1_Ele17_47488	0	0	0.857143		Acol_hAT_Ele14_3182	1	1	1
ERS311793	Côte d'Ivoire		Acol_tSINE_Ele1_29127	0	0	0.857143		Acol_hAT_Ele15_7200	0.925926	0.9	1
ERS311823	Côte d'Ivoire		Acol_tSINE_Ele1_35138	0	0	0.857143		Acol_hAT_Ele6_14899	0.148148	0.2	1
ERS311855	Côte d'Ivoire		Acol_CR1_Ele13_36922	0	0	0.714286		Acol_hAT_Ele8_11105	0.37037	0.0666667	1
ERS311794	Côte d'Ivoire		Acol_otherMITEs_Eles25_47487	0	0	0.714286		Acol_hAT_Ele8_20840	0	0	1
ERS311825	Côte d'Ivoire		Acol_RTE_Ele2_56621	0	0	0.714286		Acol_hAT_Ele8_24600	0	0	1
ERS311856	Côte d'Ivoire		Acol_Tc1-mar_Ele2_36921	0	0	0.714286		Acol_hAT_Ele8_33462	0	0	1
ERS311800	Côte d'Ivoire		Acol_m3bp_Ele2_16628	0.333333	0.4	0.571429		Acol_I_Ele3_22383	0	0	1
ERS311831	Côte d'Ivoire		Acol_mTA_Ele31_47483	0	0	0.571429		Acol_I_Ele4_27552	0	0	1
ERS311863	Côte d'Ivoire		Acol_otherMITEs_Eles24_9741	0.925926	0.866667	0.571429		Acol_I_Ele7_39368	0	0	1
ERS311802	Côte d'Ivoire		Acol_tSINE_Ele1_57845	0.555556	0.333333	0.428571		Acol_Jockey_Ele11_26931	0	0	1
ERS311832	Côte d'Ivoire		Acol_m3bp_Ele15_19128	0	0	0.285714		Acol_Jockey_Ele13_5943	0.962963	0.933333	1
ERS311864	Côte d'Ivoire		Acol_m2bp_Ele10_11462	0	0	0.142857		Acol_Jockey_Ele14_31112	0	0	1
ERS311808	Côte d'Ivoire		Acol_m3bp_Ele15_3204	0	0	0.142857		Acol_LTR_Ele1_1984	1	1	1
ERS311833	Côte d'Ivoire		Acol_m3bp_Ele24_8316	0	0	0.142857		Acol_LTR_Ele4_7284	0.925926	0.866667	1
ERS311865	Côte d'Ivoire		Acol_RTE_Ele2_1764	0	0	0.142857		Acol_LTR_Ele6_31901	0	0	1
ERS311783	Côte d'Ivoire		Acol_Tc1-mar_Ele8_614	0.37037	0.766667	0.142857		Acol_m2bp_Ele1_19381	0	0	1
ERS311809	Côte d'Ivoire							Acol_m2bp_Ele1_19428	0	0	1
ERS311839	Côte d'Ivoire							Acol_m2bp_Ele1_31364	0	0	1
ERS311784	Côte d'Ivoire							Acol_m2bp_Ele1_31648	0	0	1
ERS311810	Côte d'Ivoire							Acol_m2bp_Ele10_17693	0	0	1
ERS311840	Côte d'Ivoire							Acol_m2bp_Ele10_20397	0	0	1
ERS311786	Côte d'Ivoire							Acol_m2bp_Ele10_2290	1	1	1
ERS311815	Côte d'Ivoire							Acol_m2bp_Ele10_30	1	1	1
ERS311841	Côte d'Ivoire							Acol_m2bp_Ele3_4446	1	0.933333	1
								Acol_m3bp_Ele1_1731	1	1	1
								Acol_m3bp_Ele1_9029	0.666667	0.533333	1
								Acol_m3bp_Ele10_26480	0	0	1
								Acol_m3bp_Ele15_2447	1	1	1
								Acol_m3bp_Ele15_3459	1	0.966667	1
								Acol_m3bp_Ele15_5764	1	0.733333	1
								Acol_m3bp_Ele2_1123	1	1	1
								Acol_m3bp_Ele2_132	1	1	1
								Acol_m3bp_Ele2_22631	0	0	1
								Acol_m3bp_Ele2_24270	0	0	1
								Acol_m3bp_Ele2_33423	0	0	1
								Acol_m3bp_Ele21_7579	0.925926	0.833333	1
								Acol_m3bp_Ele24_11803	0.333333	0.566667	1
								Acol_m3bp_Ele25_37476	0	0	1
								Acol_m3bp_Ele3_24018	0	0	1
								Acol_m3bp_Ele3_39847	0	0	1
								Acol_m3bp_Ele3_39848	0	0	1
								Acol_m3bp_Ele7_10229	0.62963	0.266667	1
								Acol_m3bp_Ele8_20752	0	0	1
								Acol_m3bp_Ele8_8572	0.814815	0.6	1
								Acol_m3bp_Ele9_17329	0	0.133333	1
								Acol_m4bp_Ele1_8457	0.814815	0.7	1
								Acol_m4bp_Ele2_39369	0	0	1
								Acol_m4bp_Ele3_9026	0.666667	0.833333	1
								Acol_m4bp_Ele4_37330	0	0	1
								Acol_m8bp_Ele7_33388	0	0	1
								Acol_m8bp_Ele7_4062	1	0.966667	1
								Acol_m8bp_Ele7_8568	0.814815	0.6	1
								Acol_m8bp_Ele8_1983	1	1	1
								Acol_mar_Ele29_3781	1	0.966667	1
								Acol_mTA_Ele10_16437	0.111111	0.0333333	1
								Acol_mTA_Ele11_10668	0.518519	0.433333	1
								Acol_mTA_Ele11_16438	0.0740741	0.1	1
								Acol_mTA_Ele11_31914	0	0	1
								Acol_mTA_Ele11_32870	0	0	1
								Acol_mTA_Ele11_34380	0	0	1
								Acol_mTA_Ele11_35077	0	0	1
								Acol_mTA_Ele12_39801	0	0	1
								Acol_mTA_Ele13_19427	0	0	1
								Acol_mTA_Ele13_21183	0	0	1
								Acol_mTA_Ele13_3648	1	0.966667	1
								Acol_mTA_Ele14_13367	0.259259	0.2	1
								Acol_mTA_Ele14_19441	0	0	1
								Acol_mTA_Ele14_4025	1	0.966667	1
								Acol_mTA_Ele14_8327	0.925926	0.8	1
								Acol_mTA_Ele15_30029	0	0	1
								Acol_mTA_Ele15_5810	0.962963	0.966667	1
								Acol_mTA_Ele16_20605	0	0	1
								Acol_mTA_Ele16_39802	0	0	1
								Acol_mTA_Ele19_12704	0.333333	0.2	1
								Acol_mTA_Ele20_29684	0	0	1
								Acol_mTA_Ele21_17663	0	0.0333333	1
								Acol_mTA_Ele21_17977	0	0	1
								Acol_mTA_Ele21_27572	0	0	1
								Acol_mTA_Ele21_29685	0	0	1
								Acol_mTA_Ele23_6451	0.962963	0.866667	1
								Acol_mTA_Ele3_24460	0	0	1
								Acol_mTA_Ele31_17220	0.037037	0	1
								Acol_mTA_Ele31_24461	0	0	1
								Acol_mTA_Ele31_27939	0	0	1
								Acol_mTA_Ele31_3638	1	0.966667	1
								Acol_mTA_Ele31_39865	0	0	1
								Acol_mTA_Ele31_7587	0.925926	0.833333	1
								Acol_mTA_Ele5_24007	0	0	1
								Acol_mTA_Ele5_24008	0	0	1
								Acol_mTA_Ele5_30059	0	0	1
								Acol_mTA_Ele7_29294	0	0	1
								Acol_mTA_Ele7_36945	0	0	1
								Acol_mTA_Ele9_19440	0	0	1
								Acol_otherMITEs_Eles1_30030	0	0	1
								Acol_otherMITEs_Eles1_30999	0	0	1
								Acol_otherMITEs_Eles13_31900	0	0	1
								Acol_otherMITEs_Eles14_10519	0.555556	0.5	1
								Acol_otherMITEs_Eles16_29683	0	0	1
								Acol_otherMITEs_Eles19_14435	0.185185	0.133333	1
								Acol_otherMITEs_Eles22_39880	0	0	1
								Acol_otherMITEs_Eles25_20063	0	0	1
								Acol_otherMITEs_Eles25_29431	0	0	1
								Acol_otherMITEs_Eles26_226	1	1	1
								Acol_otherMITEs_Eles3_17976	0	0	1
								Acol_otherMITEs_Eles3_38522	0	0	1
								Acol_otherMITEs_Eles4_19380	0	0	1
								Acol_otherMITEs_Eles8_28412	0	0	1
								Acol_Outcast_Ele2_22630	0	0	1
								Acol_Outcast_Ele2_2448	1	1	1
								Acol_Outcast_Ele7_15192	0.148148	0.1	1
								Acol_Outcast_Ele8_17515	0	0.133333	1
								Acol_P_Ele5_10534	0.555556	0.133333	1
								Acol_P_Ele5_28040	0	0	1
								Acol_P_Ele7_9031	0.666667	0.5	1
								Acol_Pao_Bel_Ele18_479	1	1	1
								Acol_Pao_Bel_Ele25_16729	0.037037	0.0333333	1
								Acol_Pao_Bel_Ele29_1514	1	1	1
								Acol_Pao_Bel_Ele45_28413	0	0	1
								Acol_Pao_Bel_Ele50_24006	0	0	1
								Acol_Pao_Bel_Ele53_6866	0.962963	0.866667	1
								Acol_Pao_Bel_Ele56_17658	0	0.0666667	1
								Acol_Pao_Bel_Ele64_21130	0	0	1
								Acol_Pao_Bel_Ele7_169	1	1	1
								Acol_Pao_Bel_Ele7_26775	0	0	1
								Acol_Pao_Bel_Ele73_3383	1	0.966667	1
								Acol_Pao_Bel_Ele73_448	1	1	1
								Acol_Pao_Bel_Ele73_5963	0.962963	0.9	1
								Acol_PIF_Ele1_10670	0.444444	0.433333	1
								Acol_PIF_Ele10_39506	0	0	1
								Acol_PIF_Ele11_29679	0	0	1
								Acol_PIF_Ele11_30031	0	0	1
								Acol_PIF_Ele11_39373	0	0	1
								Acol_PIF_Ele12_2819	1	1	1
								Acol_PIF_Ele12_29295	0	0	1
								Acol_PIF_Ele4_483	1	1	1
								Acol_PIF_Ele5_39367	0	0	1
								Acol_PIF_Ele5_39507	0	0	1
								Acol_PIF_Ele5_39508	0	0	1
								Acol_PIF_Ele6_20753	0	0	1
								Acol_piggyBac_Ele5_19386	0	0	1
								Acol_piggyBac_Ele5_7014	0.962963	0.733333	1
								Acol_piggyBac_Ele6_20878	0	0	1
								Acol_piggyBac_Ele6_24073	0	0	1
								Acol_R1_Ele17_1509	1	1	1
								Acol_RTE_Ele2_19489	0	0	1
								Acol_RTE_Ele2_27571	0	0	1
								Acol_RTE_Ele2_27940	0	0	1
								Acol_RTE_Ele2_33783	0	0	1
								Acol_RTE_Ele2_5068	1	0.866667	1
								Acol_RTE_Ele3_24037	0	0	1
								Acol_RTE_Ele3_2615	1	1	1
								Acol_Tc1_Ele15_29681	0	0	1
								Acol_Tc1_Ele16_35529	0	0	1
								Acol_Tc1_Ele18_28041	0	0	1
								Acol_Tc1_Ele18_35135	0	0	1
								Acol_Tc1_Ele18_4473	1	0.933333	1
								Acol_Tc1_Ele19_7110	0.925926	0.9	1
								Acol_Tc1_Ele2_27286	0	0	1
								Acol_Tc1_Ele4_8868	0.703704	0.6	1
								Acol_Tc1-mar_Ele10_18331	0	0	1
								Acol_Tc1-mar_Ele12_49	1	1	1
								Acol_Tc1-mar_Ele3_12297	0.333333	0.3	1
								Acol_Tc1-mar_Ele4_31000	0	0	1
								Acol_Tc1-mar_Ele5_32933	0	0	1
								Acol_Tc1-mar_Ele5_39503	0	0	1
								Acol_Tc1-mar_Ele8_1588	1	1	1
								Acol_Tc1-mar_Ele8_27677	0	0	1
								Acol_Tc1-mar_Ele8_39371	0	0	1
								Acol_Tc1-mar_Ele8_39372	0	0	1
								Acol_Tc1-mar_Ele8_39866	0	0	1
								Acol_Tc1-mar_Ele8_6351	0.962963	0.9	1
								Acol_tSINE_Ele1_14624	0.148148	0.2	1
								Acol_tSINE_Ele1_15825	0.148148	0	1
								Acol_tSINE_Ele1_15968	0.111111	0.1	1
								Acol_tSINE_Ele1_16712	0.037037	0.133333	1
								Acol_tSINE_Ele1_21178	0	0	1
								Acol_tSINE_Ele1_2194	1	1	1
								Acol_tSINE_Ele1_22384	0	0	1
								Acol_tSINE_Ele1_22458	0	0	1
								Acol_tSINE_Ele1_24815	0	0	1
								Acol_tSINE_Ele1_2759	1	1	1
								Acol_tSINE_Ele1_29296	0	0	1
								Acol_tSINE_Ele1_29680	0	0	1
								Acol_tSINE_Ele1_30025	0	0	1
								Acol_tSINE_Ele1_30998	0	0	1
								Acol_tSINE_Ele1_31001	0	0	1
								Acol_tSINE_Ele1_31002	0	0	1
								Acol_tSINE_Ele1_31402	0	0	1
								Acol_tSINE_Ele1_33383	0	0	1
								Acol_tSINE_Ele1_33782	0	0	1
								Acol_tSINE_Ele1_34650	0	0	1
								Acol_tSINE_Ele1_35134	0	0	1
								Acol_tSINE_Ele1_37477	0	0	1
								Acol_tSINE_Ele1_39366	0	0	1
								Acol_tSINE_Ele1_39370	0	0	1
								Acol_tSINE_Ele1_9760	0.666667	0.433333	1
								Acol_tSINE_Ele1_9761	0.62963	0.633333	1
								Acol_tSINE_Ele2_18545	0	0	1
								Acol_tSINE_Ele2_22629	0	0	1
								Acol_tSINE_Ele2_26915	0	0	1
								Acol_tSINE_Ele2_27573	0	0	1
								Acol_tSINE_Ele2_29566	0	0	1
								Acol_tSINE_Ele2_29682	0	0	1
								Acol_tSINE_Ele2_33737	0	0	1
								Acol_tSINE_Ele2_35528	0	0	1
								Acol_tSINE_Ele2_36944	0	0	1
								Acol_tSINE_Ele2_37331	0	0	1
								Acol_tSINE_Ele2_39917	0	0	1
								Acol_tSINE_Ele2_8345	0.888889	0.433333	1
								Acol_copia_Ele27_40564	1	0.833333	0.857143
								Acol_CR1_Ele12_41527	0.851852	0.8	0.857143
								Acol_CR1_Ele22_49870	0	0	0.857143
								Acol_gypsy_Ele8_49869	0	0	0.857143
								Acol_gypsy_Ele95_49873	0	0	0.857143
								Acol_gypsy_Ele95_49874	0	0	0.857143
								Acol_hAT_Ele11_40469	1	0.966667	0.857143
								Acol_hAT_Ele11_42219	0.555556	0.433333	0.857143
								Acol_hAT_Ele11_42310	0.555556	0.433333	0.857143
								Acol_hAT_Ele6_49881	0	0	0.857143
								Acol_I_Ele4_49882	0	0	0.857143
								Acol_I_Ele5_40608	0.962963	0.866667	0.857143
								Acol_Jockey_Ele11_40565	0.962963	0.9	0.857143
								Acol_L2_Ele3_40149	1	1	0.857143
								Acol_L2_Ele3_47605	0	0	0.857143
								Acol_L2_Ele5_47604	0	0	0.857143
								Acol_m3bp_Ele11_43131	0.407407	0.4	0.857143
								Acol_m3bp_Ele2_46570	0	0	0.857143
								Acol_m3bp_Ele2_49880	0	0	0.857143
								Acol_m3bp_Ele21_45200	0	0	0.857143
								Acol_m3bp_Ele9_49868	0	0	0.857143
								Acol_m4bp_Ele2_44026	0.0740741	0.533333	0.857143
								Acol_m8bp_Ele6_46572	0	0	0.857143
								Acol_m8bp_Ele7_40146	1	1	0.857143
								Acol_m8bp_Ele7_49872	0	0	0.857143
								Acol_m8bp_Ele8_45866	0	0	0.857143
								Acol_mar_Ele29_45008	0.037037	0.233333	0.857143
								Acol_mTA_Ele11_40148	1	1	0.857143
								Acol_mTA_Ele11_40150	1	1	0.857143
								Acol_mTA_Ele11_41210	0.962963	0.766667	0.857143
								Acol_mTA_Ele11_46571	0	0	0.857143
								Acol_mTA_Ele11_49879	0	0	0.857143
								Acol_mTA_Ele12_44024	0.222222	0.266667	0.857143
								Acol_mTA_Ele12_46435	0	0	0.857143
								Acol_mTA_Ele12_49679	0	0	0.857143
								Acol_mTA_Ele15_45867	0	0	0.857143
								Acol_mTA_Ele16_49865	0	0	0.857143
								Acol_mTA_Ele24_41632	0.666667	0.3	0.857143
								Acol_mTA_Ele29_45865	0	0	0.857143
								Acol_mTA_Ele5_49878	0	0	0.857143
								Acol_mTA_Ele7_41528	0.851852	0.4	0.857143
								Acol_mTA_Ele7_41529	0.777778	0.833333	0.857143
								Acol_mTA_Ele7_41530	0.740741	0.733333	0.857143
								Acol_mTA_Ele9_45868	0	0	0.857143
								Acol_otherMITEs_Eles13_48253	0	0	0.857143
								Acol_otherMITEs_Eles14_41471	0.888889	0.833333	0.857143
								Acol_otherMITEs_Eles16_40147	1	1	0.857143
								Acol_otherMITEs_Eles16_49863	0	0	0.857143
								Acol_otherMITEs_Eles16_49864	0	0	0.857143
								Acol_otherMITEs_Eles20_49876	0	0	0.857143
								Acol_otherMITEs_Eles4_40563	1	0.9	0.857143
								Acol_P_Ele7_47146	0	0	0.857143
								Acol_Pao_Bel_Ele35_49866	0	0	0.857143
								Acol_Pao_Bel_Ele57_44063	0.0740741	0.0666667	0.857143
								Acol_PIF_Ele1_47171	0	0	0.857143
								Acol_PIF_Ele11_49862	0	0	0.857143
								Acol_PIF_Ele12_45864	0	0	0.857143
								Acol_PIF_Ele5_49884	0	0	0.857143
								Acol_PIF_Ele8_43196	0.37037	0.166667	0.857143
								Acol_PIF_Ele8_44491	0.0740741	0	0.857143
								Acol_PIF_Ele8_47603	0	0	0.857143
								Acol_RTE_Ele2_44022	0.37037	0.166667	0.857143
								Acol_RTE_Ele2_44023	0.259259	0.4	0.857143
								Acol_RTE_Ele2_49871	0	0	0.857143
								Acol_RTE_Ele3_41297	0.888889	0.933333	0.857143
								Acol_RTE_Ele3_41633	0.62963	0.5	0.857143
								Acol_RTE_Ele3_46569	0	0	0.857143
								Acol_RTE_Ele3_47707	0	0	0.857143
								Acol_RTE_Ele3_49885	0	0	0.857143
								Acol_Tc1_Ele18_49877	0	0	0.857143
								Acol_Tc1_Ele19_49875	0	0	0.857143
								Acol_Tc1-mar_Ele10_45009	0	0.0333333	0.857143
								Acol_tSINE_Ele1_39918	1	1	0.857143
								Acol_tSINE_Ele1_41531	0.666667	0.333333	0.857143
								Acol_tSINE_Ele1_42660	0.481481	0.833333	0.857143
								Acol_tSINE_Ele1_44062	0.0740741	0.533333	0.857143
								Acol_tSINE_Ele1_44066	0.0740741	0.0333333	0.857143
								Acol_tSINE_Ele1_49867	0	0	0.857143
								Acol_tSINE_Ele1_49883	0	0	0.857143
								Acol_tSINE_Ele2_41635	0.62963	0.333333	0.857143
								Acol_tSINE_Ele2_44025	0.185185	0.166667	0.857143
								Acol_tSINE_Ele2_46436	0	0	0.857143
								Acol_tSINE_Ele2_49680	0	0	0.857143
								Acol_CR1_Ele10_50139	0.777778	0.9	0.714286
								Acol_CR1_Ele3_52380	0	0	0.714286
								Acol_CR1_Ele4_52156	0	0	0.714286
								Acol_hAT_Ele11_50141	0.666667	0.6	0.714286
								Acol_m2bp_Ele10_50578	0.148148	0	0.714286
								Acol_m3bp_Ele2_50140	0.740741	0.8	0.714286
								Acol_m3bp_Ele21_49886	1	1	0.714286
								Acol_m3bp_Ele7_52622	0	0	0.714286
								Acol_m8bp_Ele6_49890	0.925926	0.666667	0.714286
								Acol_mTA_Ele11_50511	0.185185	0.133333	0.714286
								Acol_mTA_Ele14_53313	0	0	0.714286
								Acol_mTA_Ele5_51407	0	0	0.714286
								Acol_mTA_Ele6_50142	0.481481	0.633333	0.714286
								Acol_P_Ele7_51408	0	0	0.714286
								Acol_Pao_Bel_Ele35_50751	0.037037	0.233333	0.714286
								Acol_PIF_Ele10_50750	0.111111	0.333333	0.714286
								Acol_PIF_Ele5_50872	0	0.733333	0.714286
								Acol_RTE_Ele1_51895	0	0	0.714286
								Acol_Tc1_Ele1_49888	0.962963	0.733333	0.714286
								Acol_Tc1_Ele17_51027	0	0	0.714286
								Acol_Tc1_Ele18_52612	0	0	0.714286
								Acol_Tc1-mar_Ele4_49889	0.925926	0.833333	0.714286
								Acol_tSINE_Ele1_49891	0.851852	0.933333	0.714286
								Acol_tSINE_Ele1_50510	0.481481	0.533333	0.714286
								Acol_tSINE_Ele1_51020	0	0	0.714286
								Acol_tSINE_Ele1_52621	0	0	0.714286
								Acol_tSINE_Ele2_49887	1	0.933333	0.714286
								Acol_tSINE_Ele2_51019	0	0.733333	0.714286
								Acol_Loner_Ele1_53398	0.740741	0.5	0.571429
								Acol_Loner_Ele2_53397	1	0.933333	0.571429
								Acol_m2bp_Ele12_54402	0	0.733333	0.571429
								Acol_m8bp_Ele2_56557	0	0	0.571429
								Acol_mTA_Ele11_53513	0.518519	0.566667	0.571429
								Acol_mTA_Ele11_55965	0	0	0.571429
								Acol_mTA_Ele21_56631	0	0	0.571429
								Acol_mTA_Ele31_54403	0	0.733333	0.571429
								Acol_Pao_Bel_Ele8_55232	0	0	0.571429
								Acol_PIF_Ele1_54404	0	0	0.571429
								Acol_RTE_Ele3_55219	0	0	0.571429
								Acol_Tc1_Ele12_55156	0	0	0.571429
								Acol_Tc1-mar_Ele11_54908	0	0	0.571429
								Acol_Tc1-mar_Ele8_55220	0	0	0.571429
								Acol_tSINE_Ele1_53652	0.407407	0.333333	0.571429
								Acol_tSINE_Ele1_53729	0.407407	0.266667	0.571429
								Acol_tSINE_Ele1_54031	0.333333	0.633333	0.571429
								Acol_tSINE_Ele2_54087	0	0.8	0.571429
								Acol_tSINE_Ele2_54763	0	0	0.571429
								Acol_tSINE_Ele2_55040	0	0	0.571429
								Acol_copia_Ele14_57059	0	0	0.428571
								Acol_m3bp_Ele11_56662	0.37037	0.266667	0.428571
								Acol_mTA_Ele7_56632	1	1	0.428571
								Acol_Pao_Bel_Ele53_57057	0.222222	0.266667	0.428571
								Acol_RTE_Ele2_57056	0.296296	0.466667	0.428571
								Acol_RTE_Ele2_57058	0	0	0.428571
								Acol_gypsy_Ele10_57326	0.777778	0.9	0.285714
								Acol_I_Ele3_58403	0	0	0.285714
								Acol_Jockey_Ele19_57325	0.925926	0.433333	0.285714
								Acol_mTA_Ele5_57862	0.444444	0.4	0.285714
								Acol_tSINE_Ele1_58402	0.407407	0.433333	0.285714
								Acol_CR1_Ele23_58849	0.037037	0.0333333	0.142857
								Acol_CR1_Ele30_60502	0	0	0.142857
								Acol_gambol_Ele11_60503	0	0	0.142857
								Acol_gambol_Ele7_59075	0	0.0333333	0.142857
								Acol_gypsy_Ele76_59003	0.037037	0	0.142857
								Acol_hAT_Ele11_58406	0.666667	0.233333	0.142857
								Acol_hAT_Ele8_58630	0.185185	0	0.142857
								Acol_Jockey_Ele11_58812	0.111111	0.1	0.142857
								Acol_Jockey_Ele11_59074	0	0.0666667	0.142857
								Acol_L2_Ele3_59626	0	0	0.142857
								Acol_m3bp_Ele15_60501	0	0	0.142857
								Acol_m3bp_Ele2_60499	0	0	0.142857
								Acol_m3bp_Ele3_58408	0.407407	0.0666667	0.142857
								Acol_m3bp_Ele4_59505	0	0	0.142857
								Acol_m3bp_Ele8_59577	0	0	0.142857
								Acol_m3bp_Ele8_60457	0	0	0.142857
								Acol_m4bp_Ele2_60203	0	0	0.142857
								Acol_m8bp_Ele6_58848	0.037037	0.0333333	0.142857
								Acol_m8bp_Ele6_59004	0.037037	0	0.142857
								Acol_m8bp_Ele7_58813	0.037037	0.0666667	0.142857
								Acol_mTA_Ele15_59578	0	0	0.142857
								Acol_mTA_Ele15_59579	0	0	0.142857
								Acol_mTA_Ele19_60455	0	0	0.142857
								Acol_mTA_Ele21_59072	0	0.1	0.142857
								Acol_mTA_Ele21_60456	0	0	0.142857
								Acol_mTA_Ele23_60504	0	0	0.142857
								Acol_mTA_Ele23_60505	0	0	0.142857
								Acol_mTA_Ele3_58806	0.148148	0.266667	0.142857
								Acol_mTA_Ele31_58404	0.925926	0.833333	0.142857
								Acol_mTA_Ele7_58407	0.407407	0.433333	0.142857
								Acol_mTA_Ele7_60204	0	0	0.142857
								Acol_otherMITEs_Eles19_59076	0	0.0333333	0.142857
								Acol_P_Ele5_58631	0.148148	0.266667	0.142857
								Acol_PIF_Ele6_58405	0.851852	0.766667	0.142857
								Acol_piggyBac_Ele6_59078	0	0	0.142857
								Acol_RTE_Ele1_60277	0	0	0.142857
								Acol_RTE_Ele2_58533	0.185185	0.133333	0.142857
								Acol_RTE_Ele2_60276	0	0	0.142857
								Acol_Tc1_Ele18_60600	0	0	0.142857
								Acol_Tc1-mar_Ele10_59077	0	0	0.142857
								Acol_tSINE_Ele1_59490	0	0	0.142857
								Acol_tSINE_Ele2_59073	0	0.1	0.142857
								Acol_tSINE_Ele2_60500	0	0	0.142857
								Acol_tSINE_Ele2_60599	0	0	0.142857
