# Supplementary material for: Transposable element variants and their potential adaptive impact in urban populations of the malaria vector Anopheles coluzzii
Source: HighWire-hosted journal article supplement (doi:10.1101/gr.275761.121), 2021-12-29
Supplement: Supplemental_Table_S12.xlsx [file Supplemental_Table_S12.xlsx]

## Sheet: S12. TEs in immunity genes
Table S12. TE insertions in immune-related genes. Genes were obtained from ImmunoDB (Waterhouse et al., 2007). "Promoter" can be YES or NO if found or not in the TE, "dorsal" and "STAT" are the number of binding sites, "# of genomes" is the number of genomes where the TE is found and columns with the genome names can be YES or NO if the insertion is present or not in that particular genome. "Plas…
Gene ID	ImmunoDB ID	Name	Subfamily	TE family	Upstream	First intron	Promoter	dorsal	STAT	# of genomes	DLA112	DLA146	DLA155B	LBV11	LBV88	LBV136	AcolN1	Plasmodium responsive
AGAP000016	Agam:SCR13	SCRB10	SCRB	mTA_Ele12_17420	No	No	NO	0	0	6	YES	NO	YES	YES	YES	YES	YES	NO
AGAP000016	Agam:SCR13	SCRB10	SCRB	mTA_Ele24_24941	No	No	NO	1	0	6	YES	NO	YES	YES	YES	YES	YES	NO
AGAP000016	Agam:SCR13	SCRB10	SCRB	tSINE_Ele2_17421	No	No	NO	0	0	6	YES	NO	YES	YES	YES	YES	YES	NO
AGAP000016	Agam:SCR13	SCRB10	SCRB	Tc1-mar_Ele8_6650_nonREF	No	No	-	-	-	1	NO	YES	NO	NO	NO	NO	NO	NO
AGAP000051	Agam:PRDX12	HPX5	HPX	RTE_Ele3_24951	No	No	NO	0	0	7	YES	YES	YES	YES	YES	YES	YES	NO
AGAP000098	Agam:APHAG1	APG1	APHAG	RTE_Ele3_17493	Yes	No	YES	0	0	7	YES	YES	YES	YES	YES	YES	YES	NO
AGAP000098	Agam:APHAG1	APG1	APHAG	m4bp_Ele1_10302	No	No	NO	0	0	4	YES	NO	NO	YES	YES	NO	YES	NO
AGAP000098	Agam:APHAG1	APG1	APHAG	m2bp_Ele10_10303	No	No	NO	0	0	3	YES	YES	NO	NO	NO	NO	YES	NO
AGAP000099	Agam:JAKSTAT4	STAT2	STAT	m8bp_Ele6_17494	No	No	NO	0	0	7	YES	YES	YES	YES	YES	YES	YES	NO
AGAP000099	Agam:JAKSTAT4	STAT2	STAT	mTA_Ele11_8399	No	No	NO	0	0	5	YES	YES	YES	NO	YES	NO	YES	NO
AGAP000099	Agam:JAKSTAT4	STAT2	STAT	tSINE_Ele2_4722	No	No	NO	0	0	5	YES	YES	YES	NO	YES	NO	YES	NO
AGAP000099	Agam:JAKSTAT4	STAT2	STAT	m3bp_Ele2_5474	No	No	NO	0	0	4	YES	YES	YES	NO	NO	NO	YES	NO
AGAP000099	Agam:JAKSTAT4	STAT2	STAT	m2bp_Ele10_4770	Yes	No	YES	1	0	2	YES	NO	NO	NO	NO	NO	YES	NO
AGAP000099	Agam:JAKSTAT4	STAT2	STAT	mTA_Ele21_4743	Yes	No	YES	2	0	2	YES	NO	NO	NO	NO	NO	YES	NO
AGAP000099	Agam:JAKSTAT4	STAT2	STAT	m2bp_Ele1_6881_nonREF	Yes	No	-	-	-	1	YES	NO	NO	NO	NO	NO	NO	NO
AGAP000341	Agam:GALE7	GALE2	GALE	-	-	-	-	-	-	-	-	-	-	-	-	-	-	NO
AGAP000388	Agam:TOLLPATH5	TRAF6	TRAF6	hAT_Ele12_4910	No	No	NO	0	0	7	YES	YES	YES	YES	YES	YES	YES	NO
AGAP000388	Agam:TOLLPATH5	TRAF6	TRAF6	P_Ele7_17768	No	No	NO	0	0	7	YES	YES	YES	YES	YES	YES	YES	NO
AGAP000396	Agam:PRDX3	TPX1	TPX	PIF_Ele1_17788	No	No	NO	0	0	7	YES	YES	YES	YES	YES	YES	YES	NO
AGAP000396	Agam:PRDX3	TPX1	TPX	piggyBac_Ele5_25153	No	No	NO	0	0	7	YES	YES	YES	YES	YES	YES	YES	NO
AGAP000396	Agam:PRDX3	TPX1	TPX	m2bp_Ele10_27069	Yes	No	YES	1	0	6	YES	YES	NO	YES	YES	YES	YES	NO
AGAP000536	Agam:PGRP9	PGRPS1	PGRPS	L2_Ele3_18024	Yes	No	YES	0	0	7	YES	YES	YES	YES	YES	YES	YES	NO
AGAP000536	Agam:PGRP9	PGRPS1	PGRPS	L2_Ele5_18023	No	No	NO	0	0	7	YES	YES	YES	YES	YES	YES	YES	NO
AGAP000536	Agam:PGRP9	PGRPS1	PGRPS	PIF_Ele4_25275	No	No	NO	0	0	7	YES	YES	YES	YES	YES	YES	YES	NO
AGAP000536	Agam:PGRP9	PGRPS1	PGRPS	PIF_Ele8_18022	No	No	NO	0	0	7	YES	YES	YES	YES	YES	YES	YES	NO
AGAP000571	Agam:CLIP16	CLIPC6	CLIPC	RTE_Ele3_18101	Yes	No	YES	0	0	7	YES	YES	YES	YES	YES	YES	YES	NO
AGAP000692	Agam:AMP5	CEC2	Cecropin	otherMITEs_Eles13_18329	Yes	No	YES	0	0	7	YES	YES	YES	YES	YES	YES	YES	NO
AGAP000693	Agam:AMP4	CEC1	Cecropin	-	-	-	-	-	-	-	-	-	-	-	-	-	-	NO
AGAP000694	Agam:AMP6	CEC3	Cecropin	-	-	-	-	-	-	-	-	-	-	-	-	-	-	YES
AGAP000806	Agam:FREP40	FREP40	FREP	m3bp_Ele23_25613	Yes	No	YES	1	0	4	NO	NO	NO	YES	YES	YES	YES	NO
AGAP000806	Agam:FREP40	FREP40	FREP	LTR_Ele4_7295_nonREF	Yes	No	-	-	-	1	YES	NO	NO	NO	NO	NO	NO	NO
AGAP000929	Agam:CTL9	CTLSE1	CTLSE	hAT_Ele13_25718	No	No	NO	0	0	7	YES	YES	YES	YES	YES	YES	YES	NO
AGAP000929	Agam:CTL9	CTLSE1	CTLSE	hAT_Ele8_26783	No	No	NO	0	0	7	YES	YES	YES	YES	YES	YES	YES	NO
AGAP000929	Agam:CTL9	CTLSE1	CTLSE	mTA_Ele12_18878	No	No	NO	0	0	7	YES	YES	YES	YES	YES	YES	YES	NO
AGAP000929	Agam:CTL9	CTLSE1	CTLSE	RTE_Ele2_25719	No	No	NO	1	0	7	YES	YES	YES	YES	YES	YES	YES	NO
AGAP000929	Agam:CTL9	CTLSE1	CTLSE	tSINE_Ele1_20488	No	Yes	NO	0	0	7	YES	YES	YES	YES	YES	YES	YES	NO
AGAP000929	Agam:CTL9	CTLSE1	CTLSE	tSINE_Ele2_6969_nonREF	No	No	NO	0	0	2	NO	NO	YES	NO	NO	YES	NO	NO
AGAP000929	Agam:CTL9	CTLSE1	CTLSE	hAT_Ele6_4278	No	Yes	-	-	-	1	NO	NO	NO	NO	NO	NO	YES	NO
AGAP000933	Agam:APHAG12	APG10	APHAG	mTA_Ele21_20489	No	No	NO	0	0	7	YES	YES	YES	YES	YES	YES	YES	NO
AGAP000933	Agam:APHAG12	APG10	APHAG	mTA_Ele31_5623	No	No	NO	0	1	2	NO	NO	YES	NO	NO	NO	YES	NO
AGAP000933	Agam:APHAG12	APG10	APHAG	otherMITEs_Eles3_5872	No	No	-	-	-	1	NO	NO	NO	NO	NO	NO	YES	NO
AGAP000940	Agam:CTL15	CTL7	CTL	mTA_Ele16_25739	No	No	NO	0	0	7	YES	YES	YES	YES	YES	YES	YES	NO
AGAP000940	Agam:CTL15	CTL7	CTL	PIF_Ele11_18911	No	No	NO	0	0	7	YES	YES	YES	YES	YES	YES	YES	NO
AGAP000940	Agam:CTL15	CTL7	CTL	CR1_Ele22_18918	No	No	NO	0	0	6	YES	YES	YES	YES	NO	YES	YES	NO
AGAP000940	Agam:CTL15	CTL7	CTL	gambol_Ele11_1054	No	No	NO	0	0	6	YES	YES	YES	YES	NO	YES	YES	NO
AGAP000940	Agam:CTL15	CTL7	CTL	gambol_Ele15_25741	No	No	NO	0	0	6	YES	YES	YES	YES	NO	YES	YES	NO
AGAP000940	Agam:CTL15	CTL7	CTL	gypsy_Ele8_18917	No	No	NO	0	0	6	YES	YES	YES	YES	NO	YES	YES	NO
AGAP000940	Agam:CTL15	CTL7	CTL	gypsy_Ele95_18922	No	No	NO	0	0	6	YES	YES	YES	YES	NO	YES	YES	NO
AGAP000940	Agam:CTL15	CTL7	CTL	gypsy_Ele95_18923	No	No	NO	0	0	6	YES	YES	YES	YES	NO	YES	YES	NO
AGAP000940	Agam:CTL15	CTL7	CTL	hAT_Ele13_18916	No	No	NO	0	0	6	YES	YES	YES	YES	NO	YES	YES	NO
AGAP000940	Agam:CTL15	CTL7	CTL	hAT_Ele14_25745	No	No	NO	0	0	6	YES	YES	YES	YES	NO	YES	YES	NO
AGAP000940	Agam:CTL15	CTL7	CTL	hAT_Ele6_18931	No	No	NO	0	0	6	YES	YES	YES	YES	NO	YES	YES	NO
AGAP000940	Agam:CTL15	CTL7	CTL	hAT_Ele8_25740	No	No	NO	0	0	6	YES	YES	YES	YES	NO	YES	YES	NO
AGAP000940	Agam:CTL15	CTL7	CTL	I_Ele2_25746	No	No	YES	1	0	6	YES	YES	YES	YES	NO	YES	YES	NO
AGAP000940	Agam:CTL15	CTL7	CTL	I_Ele4_18932	No	No	NO	0	0	6	YES	YES	YES	YES	NO	YES	YES	NO
AGAP000940	Agam:CTL15	CTL7	CTL	m3bp_Ele15_25748	No	No	NO	0	0	6	YES	YES	YES	YES	NO	YES	YES	NO
AGAP000940	Agam:CTL15	CTL7	CTL	m3bp_Ele15_25749	No	No	NO	0	0	6	YES	YES	YES	YES	NO	YES	YES	NO
AGAP000940	Agam:CTL15	CTL7	CTL	m3bp_Ele2_18930	No	No	NO	0	0	6	YES	YES	YES	YES	NO	YES	YES	NO
AGAP000940	Agam:CTL15	CTL7	CTL	m3bp_Ele21_18921	No	No	NO	0	0	6	YES	YES	YES	YES	NO	YES	YES	NO
AGAP000940	Agam:CTL15	CTL7	CTL	m3bp_Ele21_18936	No	No	NO	0	0	6	YES	YES	YES	YES	NO	YES	YES	NO
AGAP000940	Agam:CTL15	CTL7	CTL	m3bp_Ele9_18915	No	No	NO	0	0	6	YES	YES	YES	YES	NO	YES	YES	NO
AGAP000940	Agam:CTL15	CTL7	CTL	m8bp_Ele6_18938	No	No	YES	0	3	6	YES	YES	YES	YES	NO	YES	YES	NO
AGAP000940	Agam:CTL15	CTL7	CTL	m8bp_Ele7_18920	No	No	NO	0	0	6	YES	YES	YES	YES	NO	YES	YES	NO
AGAP000940	Agam:CTL15	CTL7	CTL	mTA_Ele11_18929	No	No	YES	1	0	6	YES	YES	YES	YES	NO	YES	YES	NO
AGAP000940	Agam:CTL15	CTL7	CTL	otherMITEs_Eles16_18912	No	No	YES	1	0	6	YES	YES	YES	NO	YES	YES	YES	NO
AGAP000940	Agam:CTL15	CTL7	CTL	otherMITEs_Eles16_25738	No	No	YES	1	1	6	YES	YES	YES	NO	YES	YES	YES	NO
AGAP000940	Agam:CTL15	CTL7	CTL	otherMITEs_Eles20_18926	No	No	YES	1	1	6	YES	YES	YES	YES	NO	YES	YES	NO
AGAP000940	Agam:CTL15	CTL7	CTL	P_Ele5_25750	Yes	No	YES	0	0	6	YES	YES	YES	YES	NO	YES	YES	NO
AGAP000940	Agam:CTL15	CTL7	CTL	Pao_Bel_Ele35_18913	No	No	YES	0	1	6	YES	YES	YES	YES	NO	YES	YES	NO
AGAP000940	Agam:CTL15	CTL7	CTL	PIF_Ele5_18934	No	No	NO	0	0	6	YES	YES	YES	YES	NO	YES	YES	NO
AGAP000940	Agam:CTL15	CTL7	CTL	PIF_Ele5_25747	No	No	NO	0	0	6	YES	YES	YES	YES	NO	YES	YES	NO
AGAP000940	Agam:CTL15	CTL7	CTL	RTE_Ele2_18919	No	No	NO	0	0	6	YES	YES	YES	YES	NO	YES	YES	NO
AGAP000940	Agam:CTL15	CTL7	CTL	RTE_Ele2_25737	No	No	YES	1	1	6	YES	YES	YES	NO	YES	YES	YES	NO
AGAP000940	Agam:CTL15	CTL7	CTL	RTE_Ele3_18925	No	No	NO	0	0	6	YES	YES	YES	YES	NO	YES	YES	NO
AGAP000940	Agam:CTL15	CTL7	CTL	RTE_Ele3_18935	No	No	YES	0	1	6	YES	YES	YES	YES	NO	YES	YES	NO
AGAP000940	Agam:CTL15	CTL7	CTL	RTE_Ele3_25743	No	No	NO	0	0	6	YES	YES	YES	YES	NO	YES	YES	NO
AGAP000940	Agam:CTL15	CTL7	CTL	Tc1_Ele1_20491	No	No	NO	0	0	6	YES	YES	YES	YES	NO	YES	YES	NO
AGAP000940	Agam:CTL15	CTL7	CTL	Tc1_Ele1_20492	No	No	YES	1	0	6	YES	YES	YES	YES	NO	YES	YES	NO
AGAP000940	Agam:CTL15	CTL7	CTL	Tc1_Ele18_18927	No	No	YES	1	1	6	YES	YES	YES	YES	NO	YES	YES	NO
AGAP000940	Agam:CTL15	CTL7	CTL	Tc1_Ele19_18924	No	No	NO	0	0	6	YES	YES	YES	YES	NO	YES	YES	NO
AGAP000940	Agam:CTL15	CTL7	CTL	Tc1-mar_Ele4_18937	No	No	NO	0	0	6	YES	YES	YES	YES	NO	YES	YES	NO
AGAP000940	Agam:CTL15	CTL7	CTL	tSINE_Ele1_18914	No	No	NO	0	0	6	YES	YES	YES	YES	NO	YES	YES	NO
AGAP000940	Agam:CTL15	CTL7	CTL	tSINE_Ele1_18933	No	No	NO	0	0	6	YES	YES	YES	YES	NO	YES	YES	NO
AGAP000940	Agam:CTL15	CTL7	CTL	tSINE_Ele1_18939	No	No	NO	0	0	6	YES	YES	YES	YES	NO	YES	YES	NO
AGAP000940	Agam:CTL15	CTL7	CTL	tSINE_Ele1_25742	Yes	No	NO	0	0	6	YES	YES	YES	YES	NO	YES	YES	NO
AGAP000940	Agam:CTL15	CTL7	CTL	tSINE_Ele1_25744	No	No	NO	0	0	6	YES	YES	YES	YES	NO	YES	YES	NO
AGAP000940	Agam:CTL15	CTL7	CTL	tSINE_Ele2_20490	No	No	NO	0	0	6	YES	YES	YES	YES	NO	YES	YES	NO
AGAP000940	Agam:CTL15	CTL7	CTL	mTA_Ele5_18928	No	No	NO	0	0	5	YES	YES	NO	YES	NO	YES	YES	NO
AGAP000940	Agam:CTL15	CTL7	CTL	CR1_Ele7_5501	No	No	YES	1	0	2	NO	NO	YES	NO	NO	NO	YES	NO
AGAP000999	Agam:TOLL5	TOLL5A	TOLL	mTA_Ele23_6790_nonREF	Yes	No	-	-	-	1	NO	YES	NO	NO	NO	NO	NO	NO
AGAP001004	Agam:TOLL7	TOLL1A	TOLL	CR1_Ele10_19087	No	No	NO	0	0	7	YES	YES	YES	YES	YES	YES	YES	NO
AGAP001004	Agam:TOLL7	TOLL1A	TOLL	hAT_Ele11_19089	No	Yes	NO	0	0	7	YES	YES	YES	YES	YES	YES	YES	NO
AGAP001004	Agam:TOLL7	TOLL1A	TOLL	m3bp_Ele2_19088	No	Yes	NO	0	0	7	YES	YES	YES	YES	YES	YES	YES	NO
AGAP001004	Agam:TOLL7	TOLL1A	TOLL	mTA_Ele6_19090	No	Yes	NO	0	0	7	YES	YES	YES	YES	YES	YES	YES	NO
AGAP001014	Agam:CASPA1	Michelob_x	Michelob_x	-	-	-	-	-	-	-	-	-	-	-	-	-	-	NO
AGAP001197	Agam:GALE10	GALE10	GALE	-	-	-	-	-	-	-	-	-	-	-	-	-	-	NO
AGAP001212	Agam:PGRP7	PGRPLB1	PGRPL	Pao_Bel_Ele7_9258	Yes	No	NO	0	0	7	YES	YES	YES	YES	YES	YES	YES	NO
AGAP001375	Agam:SRPN18	SRPN12	SRPN-nonINHIB	-	-	-	-	-	-	-	-	-	-	-	-	-	-	NO
AGAP001376	Agam:SRPN16	SRPN17	SRPN-INHIB	-	-	-	-	-	-	-	-	-	-	-	-	-	-	NO
AGAP001377	Agam:SRPN17	SRPN11	SRPN-nonINHIB	-	-	-	-	-	-	-	-	-	-	-	-	-	-	YES
AGAP001648	Agam:CLIP27	CLIPB17	CLIPB	tSINE_Ele1_4427_nonREF	Yes	No	-	-	-	1	NO	NO	NO	YES	NO	NO	NO	NO
AGAP001762	Agam:APHAG11	APG9	APHAG	PIF_Ele1_22140	No	No	NO	0	0	7	YES	YES	YES	YES	YES	YES	YES	NO
AGAP001762	Agam:APHAG11	APG9	APHAG	mTA_Ele31_27259	Yes	No	NO	0	0	6	NO	YES	YES	YES	YES	YES	YES	NO
AGAP001762	Agam:APHAG11	APG9	APHAG	m2bp_Ele12_27260	Yes	No	YES	0	0	3	NO	YES	NO	YES	NO	NO	YES	NO
AGAP001762	Agam:APHAG11	APG9	APHAG	Tc1-mar_Ele4_27258	No	No	YES	0	0	3	NO	YES	NO	YES	NO	NO	YES	NO
AGAP001956	Agam:ML12	ML28	ML	PIF_Ele1_3111	Yes	No	NO	0	0	7	YES	YES	YES	YES	YES	YES	YES	NO
AGAP001979	Agam:SCR19	SCRASP3	SCRA	mTA_Ele11_12590	No	No	NO	0	1	7	YES	YES	YES	YES	YES	YES	YES	NO
AGAP001979	Agam:SCR19	SCRASP3	SCRA	otherMITEs_Eles26_224	No	No	NO	0	0	6	NO	YES	YES	YES	YES	YES	YES	NO
AGAP001979	Agam:SCR19	SCRASP3	SCRA	mTA_Ele11_3110	No	No	-	-	-	1	NO	NO	NO	NO	NO	NO	YES	NO
AGAP001979	Agam:SCR19	SCRASP3	SCRA	PIF_Ele12_4270_nonREF	No	No	-	-	-	1	NO	NO	NO	YES	NO	NO	NO	NO
AGAP002005	Agam:FREP48	FREP48	FREP	-	-	-	-	-	-	-	-	-	-	-	-	-	-	NO
AGAP002270	Agam:CLIP25	CLIPB7	CLIPB	tSINE_Ele1_12721	No	No	NO	0	0	7	YES	YES	YES	YES	YES	YES	YES	NO
AGAP002270	Agam:CLIP25	CLIPB7	CLIPB	tSINE_Ele2_22270	No	No	NO	0	0	7	YES	YES	YES	YES	YES	YES	YES	NO
AGAP002422	Agam:CLIP11	CLIPD1	CLIPD	-	-	-	-	-	-	-	-	-	-	-	-	-	-	NO
AGAP002451	Agam:SCR6	SCRB1	SCRB	P_Ele5_3038	No	No	-	-	-	1	NO	NO	NO	NO	NO	NO	YES	NO
AGAP002451	Agam:SCR6	SCRB1	SCRB	Tc1-mar_Ele11_3037	No	No	-	-	-	1	NO	NO	NO	NO	NO	NO	YES	NO
AGAP002554	Agam:SRRP7	PASHA	Pasha	otherMITEs_Eles14_3027	Yes	No	-	-	-	1	NO	NO	NO	NO	NO	NO	YES	NO
AGAP002625	Agam:CTL11	CTL9	CTL	tSINE_Ele2_22320	No	No	NO	0	0	7	YES	YES	YES	YES	YES	YES	YES	YES
AGAP002651	Agam:IAP2	IAP6	IAP	-	-	-	-	-	-	-	-	-	-	-	-	-	-	YES
AGAP002685	Agam:APHAG10	APG8	APHAG	-	-	-	-	-	-	-	-	-	-	-	-	-	-	YES
AGAP002738	Agam:SCR8	SCRB5	SCRB	mTA_Ele11_12883	No	Yes	NO	0	0	7	YES	YES	YES	YES	YES	YES	YES	NO
AGAP002738	Agam:SCR8	SCRB5	SCRB	Tc1_Ele12_22353	No	Yes	NO	0	0	7	YES	YES	YES	YES	YES	YES	YES	NO
AGAP002796	Agam:BGBP4	GNBPB4	GNBPB	-	-	-	-	-	-	-	-	-	-	-	-	-	-	NO
AGAP002798	Agam:BGBP2	GNBPB2	GNBPB	-	-	-	-	-	-	-	-	-	-	-	-	-	-	NO
AGAP002799	Agam:BGBP3	GNBPB3	GNBPB	-	-	-	-	-	-	-	-	-	-	-	-	-	-	NO
AGAP002804	Agam:ML4	ML4	ML	-	-	-	-	-	-	-	-	-	-	-	-	-	-	NO
AGAP002813	Agam:CLIP15	CLIPD6	CLIPD	-	-	-	-	-	-	-	-	-	-	-	-	-	-	NO
AGAP002815	Agam:CLIP59	CLIPA15	CLIPA	-	-	-	-	-	-	-	-	-	-	-	-	-	-	NO
AGAP002825	Agam:PPO1	PPO1	PPO	-	-	-	-	-	-	-	-	-	-	-	-	-	-	NO
AGAP002829	Agam:SRRP11	SPNE	Spindle_E	CR1_Ele23_20899	Yes	No	YES	0	0	5	NO	YES	YES	YES	NO	YES	YES	NO
AGAP002829	Agam:SRRP11	SPNE	Spindle_E	Tc1-mar_Ele8_27294	Yes	No	YES	0	0	4	NO	YES	YES	YES	NO	NO	YES	NO
AGAP002836	Agam:SRRP1	DCR1	Dicer	-	-	-	-	-	-	-	-	-	-	-	-	-	-	NO
AGAP002847	Agam:ML3	ML3	ML	-	-	-	-	-	-	-	-	-	-	-	-	-	-	NO
AGAP002848	Agam:ML8	ML9	ML	-	-	-	-	-	-	-	-	-	-	-	-	-	-	NO
AGAP002849	Agam:ML6	ML7	ML	-	-	-	-	-	-	-	-	-	-	-	-	-	-	NO
AGAP002850	Agam:ML14	ML5	ML	-	-	-	-	-	-	-	-	-	-	-	-	-	-	NO
AGAP002851	Agam:ML5	ML6	ML	tSINE_Ele1_12902	Yes	No	NO	0	0	7	YES	YES	YES	YES	YES	YES	YES	NO
AGAP002852	Agam:ML7	ML8	ML	tSINE_Ele1_12902	No	No	NO	0	0	7	YES	YES	YES	YES	YES	YES	YES	NO
AGAP002857	Agam:ML2	ML2	ML	Pao_Bel_Ele8_22367	No	No	NO	0	0	6	NO	YES	YES	YES	YES	YES	YES	NO
AGAP002857	Agam:ML2	ML2	ML	Tc1_Ele18_12903	No	No	NO	0	0	5	NO	YES	YES	YES	NO	YES	YES	NO
AGAP002857	Agam:ML2	ML2	ML	m3bp_Ele15_3948_nonREF	No	No	-	-	-	1	NO	YES	NO	NO	NO	NO	NO	NO
AGAP002911	Agam:CTL25	CTLMA9	CTLMA	tSINE_Ele2_5070	No	No	NO	1	0	3	YES	YES	NO	NO	NO	NO	YES	NO
AGAP002911	Agam:CTL25	CTLMA9	CTLMA	piggyBac_Ele6_5209	No	No	NO	0	0	2	YES	NO	NO	NO	NO	NO	YES	NO
AGAP002966	Agam:TOLLPATH2	PLL1	PELLE	Outcast_Ele8_2986	Yes	No	-	-	-	1	NO	NO	NO	NO	NO	NO	YES	NO
AGAP003057	Agam:CLIP29	CLIPB8	CLIPB	Jockey_Ele11_9306	No	No	NO	0	1	5	YES	YES	YES	NO	YES	NO	YES	NO
AGAP003057	Agam:CLIP29	CLIPB8	CLIPB	tSINE_Ele1_2971	Yes	No	-	-	-	1	NO	NO	NO	NO	NO	NO	YES	NO
AGAP003058	Agam:CLIP24	CLIPB10	CLIPB	-	-	-	-	-	-	-	-	-	-	-	-	-	-	NO
AGAP003139	Agam:SRPN10	SRPN9	SRPN-INHIB	-	-	-	-	-	-	-	-	-	-	-	-	-	-	NO
AGAP003194	Agam:SRPN9	SRPN8	SRPN-INHIB	-	-	-	-	-	-	-	-	-	-	-	-	-	-	NO
AGAP003246	Agam:CLIP6	CLIPB2	CLIPB	Tc1_Ele16_20085	No	No	NO	0	0	7	YES	YES	YES	YES	YES	YES	YES	NO
AGAP003246	Agam:CLIP6	CLIPB2	CLIPB	tSINE_Ele2_20084	No	No	NO	0	0	7	YES	YES	YES	YES	YES	YES	YES	NO
AGAP003247	Agam:CLIP35	CLIPB19	CLIPB	-	-	-	-	-	-	-	-	-	-	-	-	-	-	NO
AGAP003249	Agam:CLIP34	CLIPB3	CLIPB	-	-	-	-	-	-	-	-	-	-	-	-	-	-	NO
AGAP003250	Agam:CLIP9	CLIPB4	CLIPB	-	-	-	-	-	-	-	-	-	-	-	-	-	-	YES
AGAP003251	Agam:CLIP10	CLIPB1	CLIPB	-	-	-	-	-	-	-	-	-	-	-	-	-	-	YES
AGAP003373	Agam:SCR5	SCRB17	SCRB	-	-	-	-	-	-	-	-	-	-	-	-	-	-	NO
AGAP003502	Agam:PRDX15	HPX6	HPX	-	-	-	-	-	-	-	-	-	-	-	-	-	-	NO
AGAP003625	Agam:CTL5	CTL8	CTL	-	-	-	-	-	-	-	-	-	-	-	-	-	-	NO
AGAP003663	Agam:SRRP13	RM62B	Rm62	mTA_Ele11_22557	No	No	NO	1	1	7	YES	YES	YES	YES	YES	YES	YES	YES
AGAP003663	Agam:SRRP13	RM62B	Rm62	m3bp_Ele7_2864	Yes	No	-	-	-	1	NO	NO	NO	NO	NO	NO	YES	YES
AGAP003858	Agam:APHAG7	APG6	APHAG	-	-	-	-	-	-	-	-	-	-	-	-	-	-	NO
AGAP004023	Agam:APHAG4	APG4A	APHAG	-	-	-	-	-	-	-	-	-	-	-	-	-	-	NO
AGAP004036	Agam:PRDX14	HPX7	HPX	tSINE_Ele1_2779	No	Yes	NO	0	0	2	NO	NO	YES	NO	NO	NO	YES	NO
AGAP004036	Agam:PRDX14	HPX7	HPX	tSINE_Ele1_2778	No	Yes	-	-	-	1	NO	NO	NO	NO	NO	NO	YES	NO
AGAP004038	Agam:PRDX13	HPX8	HPX	m8bp_Ele2_22657	No	No	NO	0	0	7	YES	YES	YES	YES	YES	YES	YES	NO
AGAP004092	Agam:APHAG2	APG2	APHAG	mTA_Ele21_22681	Yes	No	YES	0	0	6	YES	YES	NO	YES	YES	YES	YES	NO
AGAP004092	Agam:APHAG2	APG2	APHAG	mTA_Ele7_13454	No	No	NO	0	0	6	YES	YES	NO	YES	YES	YES	YES	NO
AGAP004092	Agam:APHAG2	APG2	APHAG	mTA_Ele7_22682	No	No	NO	0	0	6	YES	YES	NO	YES	YES	YES	YES	NO
AGAP004092	Agam:APHAG2	APG2	APHAG	tSINE_Ele2_13453	No	No	NO	0	0	6	YES	YES	NO	YES	YES	YES	YES	NO
AGAP004092	Agam:APHAG2	APG2	APHAG	hAT_Ele14_4782_nonREF	No	No	-	-	-	1	NO	NO	NO	YES	NO	NO	NO	NO
AGAP004118	Agam:SCR15	SCRAL1	SCRA	m3bp_Ele11_1071	Yes	No	YES	0	1	7	YES	YES	YES	YES	YES	YES	YES	NO
AGAP004118	Agam:SCR15	SCRAL1	SCRA	m3bp_Ele11_22692	No	No	NO	0	0	6	YES	YES	NO	YES	YES	YES	YES	NO
AGAP004118	Agam:SCR15	SCRAL1	SCRA	Tc1_Ele2_9343	No	No	NO	0	0	6	YES	YES	NO	YES	YES	YES	YES	NO
AGAP004148	Agam:CLIP3	CLIPB5	CLIPB	-	-	-	-	-	-	-	-	-	-	-	-	-	-	NO
AGAP004198	Agam:SRPN21	SRPN19	SRPN-nonINHIB	-	-	-	-	-	-	-	-	-	-	-	-	-	-	NO
AGAP004247	Agam:PRDX6	GPXH1	GPX	CR1_Ele4_13559	Yes	No	YES	0	0	6	YES	YES	YES	NO	YES	YES	YES	NO
AGAP004247	Agam:PRDX6	GPXH1	GPX	m4bp_Ele4_7661	Yes	No	YES	0	0	5	YES	YES	YES	NO	YES	NO	YES	NO
AGAP004248	Agam:PRDX7	GPXH3	GPX	tSINE_Ele2_13560	No	No	NO	0	0	7	YES	YES	YES	YES	YES	YES	YES	NO
AGAP004317	Agam:CLIP7	CLIPC2	CLIPC	-	-	-	-	-	-	-	-	-	-	-	-	-	-	NO
AGAP004318	Agam:CLIP8	CLIPC3	CLIPC	Pao_Bel_Ele53_26292	No	Yes	NO	0	0	7	YES	YES	YES	YES	YES	YES	YES	NO
AGAP004318	Agam:CLIP8	CLIPC3	CLIPC	RTE_Ele2_13605	No	No	NO	0	2	7	YES	YES	YES	YES	YES	YES	YES	NO
AGAP004318	Agam:CLIP8	CLIPC3	CLIPC	copia_Ele14_26293	Yes	No	YES	0	0	6	YES	YES	YES	YES	NO	YES	YES	NO
AGAP004318	Agam:CLIP8	CLIPC3	CLIPC	m3bp_Ele25_20128	No	Yes	NO	0	0	6	YES	YES	YES	YES	NO	YES	YES	NO
AGAP004318	Agam:CLIP8	CLIPC3	CLIPC	RTE_Ele2_22778	No	Yes	NO	0	0	6	YES	YES	YES	YES	NO	YES	YES	NO
AGAP004318	Agam:CLIP8	CLIPC3	CLIPC	tSINE_Ele1_13606	No	Yes	NO	0	0	6	YES	YES	YES	YES	NO	YES	YES	NO
AGAP004455	Agam:BGBP1	GNBPB1	GNBPB	Jockey_Ele19_22835	Yes	No	YES	0	0	7	YES	YES	YES	YES	YES	YES	YES	NO
AGAP004456	Agam:BGBP5	GNBPB5	GNBPB	gypsy_Ele10_7690	Yes	No	YES	0	0	7	YES	YES	YES	YES	YES	YES	YES	NO
AGAP004632	Agam:AMP2	DEF2	Defensin	-	-	-	-	-	-	-	-	-	-	-	-	-	-	NO
AGAP004643	Agam:SCR9	SCRB6	SCRB	-	-	-	-	-	-	-	-	-	-	-	-	-	-	NO
AGAP004719	Agam:CLIP28	CLIPC9	CLIPC	mTA_Ele11_21096	No	No	NO	0	0	7	YES	YES	YES	YES	YES	YES	YES	NO
AGAP004719	Agam:CLIP28	CLIPC9	CLIPC	mTA_Ele7_10582	No	No	NO	0	0	7	YES	YES	YES	YES	YES	YES	YES	NO
AGAP004719	Agam:CLIP28	CLIPC9	CLIPC	PIF_Ele12_10583	Yes	No	NO	0	0	7	YES	YES	YES	YES	YES	YES	YES	NO
AGAP004719	Agam:CLIP28	CLIPC9	CLIPC	tSINE_Ele1_10584	Yes	No	YES	0	0	7	YES	YES	YES	YES	YES	YES	YES	NO
AGAP004719	Agam:CLIP28	CLIPC9	CLIPC	tSINE_Ele1_7142	No	No	NO	0	0	2	NO	NO	NO	NO	YES	NO	YES	NO
AGAP004754	Agam:CASP4	CASPL2	CASPL	m2bp_Ele10_20532	No	No	YES	0	0	6	YES	YES	YES	NO	YES	YES	YES	NO
AGAP004754	Agam:CASP4	CASPL2	CASPL	otherMITEs_Eles25_10636	Yes	No	NO	0	0	6	YES	YES	YES	NO	YES	YES	YES	NO
AGAP004807	Agam:GALE6	GALE7	GALE	-	-	-	-	-	-	-	-	-	-	-	-	-	-	NO
AGAP004810	Agam:CTL16	CTL3	CTL	tSINE_Ele2_10693	No	No	NO	0	0	7	YES	YES	YES	YES	YES	YES	YES	NO
AGAP004811	Agam:CTL17	CTL1	CTL	-	-	-	-	-	-	-	-	-	-	-	-	-	-	NO
AGAP004845	Agam:SCR11	SCRB8	SCRB	otherMITEs_Eles16_10739	No	Yes	NO	0	1	7	YES	YES	YES	YES	YES	YES	YES	YES
AGAP004845	Agam:SCR11	SCRB8	SCRB	Pao_Bel_Ele35_21152	No	Yes	YES	0	1	7	YES	YES	YES	YES	YES	YES	YES	YES
AGAP004845	Agam:SCR11	SCRB8	SCRB	mTA_Ele20_10740	No	Yes	NO	0	0	6	YES	YES	YES	NO	YES	YES	YES	YES
AGAP004845	Agam:SCR11	SCRB8	SCRB	mTA_Ele21_20860	Yes	No	NO	0	0	6	YES	NO	YES	YES	YES	YES	YES	YES
AGAP004846	Agam:SCR12	SCRB9	SCRB	tSINE_Ele2_10738	No	No	NO	0	0	7	YES	YES	YES	YES	YES	YES	YES	NO
AGAP004846	Agam:SCR12	SCRB9	SCRB	tSINE_Ele1_2715_nonREF	No	No	-	-	-	1	NO	NO	NO	YES	NO	NO	NO	NO
AGAP004847	Agam:SCR10	SCRB7	SCRB	PIF_Ele10_21151	No	No	NO	0	0	7	YES	YES	YES	YES	YES	YES	YES	NO
AGAP004847	Agam:SCR10	SCRB7	SCRB	PIF_Ele11_10735	No	No	NO	0	0	7	YES	YES	YES	YES	YES	YES	YES	NO
AGAP004847	Agam:SCR10	SCRB7	SCRB	Tc1_Ele15_10737	No	Yes	NO	0	0	6	YES	YES	YES	YES	NO	YES	YES	NO
AGAP004847	Agam:SCR10	SCRB7	SCRB	tSINE_Ele1_10736	No	No	NO	0	0	6	YES	YES	YES	YES	NO	YES	YES	NO
AGAP004855	Agam:CLIP4	CLIPB13	CLIPB	copia_Ele27_2222	No	No	NO	0	0	7	YES	YES	YES	YES	YES	YES	YES	NO
AGAP004904	Agam:CAT1	CAT	CAT	-	-	-	-	-	-	-	-	-	-	-	-	-	-	NO
AGAP004912	Agam:SRRP14	RM62C	Rm62	-	-	-	-	-	-	-	-	-	-	-	-	-	-	NO
AGAP004918	Agam:FREP63	FREP63	FREP	Tc1_Ele18_3479_nonREF	Yes	No	-	-	-	1	NO	NO	YES	NO	NO	NO	NO	NO
AGAP004934	Agam:GALE1	GALE3	GALE	hAT_Ele11_10847	No	No	NO	0	0	7	YES	YES	YES	YES	YES	YES	YES	NO
AGAP004934	Agam:GALE1	GALE3	GALE	PIF_Ele5_21194	Yes	No	NO	0	0	7	YES	YES	YES	YES	YES	YES	YES	NO
AGAP004959	Agam:IMDPATH1	IMD	IMD	-	-	-	-	-	-	-	-	-	-	-	-	-	-	NO
AGAP004975	Agam:PPO3	PPO3	PPO	P_Ele7_2192	No	No	NO	0	0	7	YES	YES	YES	YES	YES	YES	YES	NO
AGAP004975	Agam:PPO3	PPO3	PPO	tSINE_Ele1_21213	Yes	No	NO	0	0	7	YES	YES	YES	YES	YES	YES	YES	NO
AGAP004975	Agam:PPO3	PPO3	PPO	tSINE_Ele2_21212	Yes	No	NO	0	0	7	YES	YES	YES	YES	YES	YES	YES	NO
AGAP004976	Agam:PPO8	PPO8	PPO	CR1_Ele30_10872	Yes	No	YES	0	0	6	YES	YES	YES	NO	YES	YES	YES	NO
AGAP004976	Agam:PPO8	PPO8	PPO	CR1_Ele31_10871	No	No	NO	0	0	6	YES	YES	YES	NO	YES	YES	YES	NO
AGAP004977	Agam:PPO6	PPO6	PPO	CR1_Ele30_10872	No	No	NO	0	0	6	YES	YES	YES	NO	YES	YES	YES	NO
AGAP004977	Agam:PPO6	PPO6	PPO	tSINE_Ele1_10873	No	No	NO	0	0	6	YES	YES	YES	NO	YES	YES	YES	NO
AGAP004978	Agam:PPO9	PPO9	PPO	-	-	-	-	-	-	-	-	-	-	-	-	-	-	NO
AGAP004980	Agam:PPO7	PPO7	PPO	gypsy_Ele85_6671	Yes	No	YES	0	0	6	NO	YES	YES	YES	YES	YES	YES	NO
AGAP004980	Agam:PPO7	PPO7	PPO	mTA_Ele15_5555	No	No	NO	0	1	4	YES	NO	YES	NO	NO	YES	YES	NO
AGAP004981	Agam:PPO4	PPO4	PPO	otherMITEs_Eles1_10874	No	No	NO	0	0	5	YES	NO	NO	YES	YES	YES	YES	NO
AGAP004981	Agam:PPO4	PPO4	PPO	Tc1_Ele17_21214	No	No	NO	0	0	5	YES	NO	NO	YES	YES	YES	YES	NO
AGAP004998	Agam:FREP49	FREP49	FREP	mTA_Ele5_10887	Yes	No	YES	0	0	7	YES	YES	YES	YES	YES	YES	YES	NO
AGAP005102	Agam:APHAG9	APG7B	APHAG	I_Ele3_11161	No	No	NO	0	0	7	YES	YES	YES	YES	YES	YES	YES	NO
AGAP005102	Agam:APHAG9	APG7B	APHAG	tSINE_Ele1_11162	No	No	NO	0	0	7	YES	YES	YES	YES	YES	YES	YES	NO
AGAP005102	Agam:APHAG9	APG7B	APHAG	m3bp_Ele9_5637	Yes	No	YES	0	0	6	YES	YES	YES	YES	NO	YES	YES	NO
AGAP005102	Agam:APHAG9	APG7B	APHAG	Tc1-mar_Ele10_11163	Yes	No	NO	0	0	6	YES	YES	YES	YES	NO	YES	YES	NO
AGAP005126	Agam:SPZ3	SPZ6	SPZ	-	-	-	-	-	-	-	-	-	-	-	-	-	-	NO
AGAP005203	Agam:PGRP1	PGRPLC1	PGRPL	gambol_Ele12_2100	No	No	-	-	-	1	NO	NO	NO	NO	NO	NO	YES	YES
AGAP005204	Agam:PGRP5	PGRPLA2	PGRPL	-	-	-	-	-	-	-	-	-	-	-	-	-	-	NO
AGAP005205	Agam:PGRP4	PGRPLA1	PGRPL	otherMITEs_Eles1_11257	No	No	NO	0	0	7	YES	YES	YES	YES	YES	YES	YES	NO
AGAP005205	Agam:PGRP4	PGRPLA1	PGRPL	Tc1-mar_Ele4_11258	No	No	NO	0	0	7	YES	YES	YES	YES	YES	YES	YES	NO
AGAP005205	Agam:PGRP4	PGRPLA1	PGRPL	tSINE_Ele1_11256	No	No	NO	0	0	7	YES	YES	YES	YES	YES	YES	YES	NO
AGAP005205	Agam:PGRP4	PGRPLA1	PGRPL	tSINE_Ele1_20550	Yes	No	NO	0	0	7	YES	YES	YES	YES	YES	YES	YES	NO
AGAP005205	Agam:PGRP4	PGRPLA1	PGRPL	tSINE_Ele1_11259	No	No	YES	0	0	5	YES	YES	NO	NO	YES	YES	YES	NO
AGAP005205	Agam:PGRP4	PGRPLA1	PGRPL	m3bp_Ele8_2096	No	Yes	-	-	-	1	NO	NO	NO	NO	NO	NO	YES	NO
AGAP005205	Agam:PGRP4	PGRPLA1	PGRPL	m8bp_Ele7_2089	No	No	-	-	-	1	NO	NO	NO	NO	NO	NO	YES	NO
AGAP005234	Agam:SOD4	CuSOD2	SOD-Cu-Zn	-	-	-	-	-	-	-	-	-	-	-	-	-	-	NO
AGAP005246	Agam:SRPN11	SRPN10a	SRPN-INHIB	Jockey_Ele14_26056	No	No	NO	2	2	7	YES	YES	YES	YES	YES	YES	YES	NO
AGAP005246	Agam:SRPN11	SRPN10a	SRPN-INHIB	tSINE_Ele1_7310	No	No	NO	0	0	7	YES	YES	YES	YES	YES	YES	YES	NO
AGAP005246	Agam:SRPN11	SRPN10a	SRPN-INHIB	RTE_Ele1_26057	No	No	-	-	-	1	NO	NO	NO	NO	NO	NO	YES	NO
AGAP005252	Agam:TOLLPATH3	MYD	MYD88	m3bp_Ele21_4745	Yes	No	NO	0	0	2	YES	NO	NO	NO	NO	NO	YES	NO
AGAP005252	Agam:TOLLPATH3	MYD	MYD88	mTA_Ele31_1633	Yes	No	-	-	-	1	NO	NO	NO	NO	NO	NO	YES	NO
AGAP005332	Agam:CTL12	CTLMA6	CTLMA	-	-	-	-	-	-	-	-	-	-	-	-	-	-	NO
AGAP005334	Agam:CTL18	CTLMA2	CTLMA	-	-	-	-	-	-	-	-	-	-	-	-	-	-	NO
AGAP005335	Agam:CTL19	CTL4	CTL	m2bp_Ele1_11399	Yes	No	NO	0	0	7	YES	YES	YES	YES	YES	YES	YES	NO
AGAP005351	Agam:SRRP15	RM62D	Rm62	tSINE_Ele1_11408	No	No	NO	0	0	7	YES	YES	YES	YES	YES	YES	YES	NO
AGAP005351	Agam:SRRP15	RM62D	Rm62	CR1_Ele3_2050	No	No	-	-	-	1	NO	NO	NO	NO	NO	NO	YES	NO
AGAP005351	Agam:SRRP15	RM62D	Rm62	CR1_Ele3_2051	No	No	-	-	-	1	NO	NO	NO	NO	NO	NO	YES	NO
AGAP005351	Agam:SRRP15	RM62D	Rm62	CR1_Ele4_21459	No	No	-	-	-	1	NO	NO	NO	NO	NO	NO	YES	NO
AGAP005351	Agam:SRRP15	RM62D	Rm62	m4bp_Ele1_2054	Yes	No	-	-	-	1	NO	NO	NO	NO	NO	NO	YES	NO
AGAP005552	Agam:PGRP6	PGRPLD	PGRPL	m2bp_Ele1_11506	No	No	NO	0	0	7	YES	YES	YES	YES	YES	YES	YES	NO
AGAP005552	Agam:PGRP6	PGRPLD	PGRPL	CR1_Ele3_3556_nonREF	No	No	-	-	-	-	-	-	-	-	-	-	-	NO
AGAP005620	Agam:AMP8	DPT	Diptericin	-	-	-	-	-	-	-	-	-	-	-	-	-	-	NO
AGAP005625	Agam:SCR17	SCRASP1	SCRA	-	-	-	-	-	-	-	-	-	-	-	-	-	-	YES
AGAP005652	Agam:SRRP12	RM62A	Rm62	-	-	-	-	-	-	-	-	-	-	-	-	-	-	NO
AGAP005672	Agam:SRRP8	TSN	TSN	-	-	-	-	-	-	-	-	-	-	-	-	-	-	NO
AGAP005716	Agam:SCR14	SCRB16	SCRB	gambol_Ele12_6690	No	No	NO	0	0	7	YES	YES	YES	YES	YES	YES	YES	NO
AGAP005716	Agam:SCR14	SCRB16	SCRB	mTA_Ele16_6691	No	No	NO	0	0	7	YES	YES	YES	YES	YES	YES	YES	NO
AGAP005716	Agam:SCR14	SCRB16	SCRB	otherMITEs_Eles13_11626	No	No	NO	0	0	7	YES	YES	YES	YES	YES	YES	YES	NO
AGAP005716	Agam:SCR14	SCRB16	SCRB	LTR_Ele6_11627	No	No	NO	0	0	6	YES	YES	YES	NO	YES	YES	YES	NO
AGAP005716	Agam:SCR14	SCRB16	SCRB	Tc1_Ele18_21592	Yes	No	YES	0	0	5	NO	YES	YES	NO	YES	YES	YES	NO
AGAP005717	Agam:LYS6	LYSC6	LYS-long	-	-	-	-	-	-	-	-	-	-	-	-	-	-	NO
AGAP005725	Agam:SCR7	SCRB3	SCRB	m3bp_Ele10_10151	No	Yes	NO	0	0	7	YES	YES	YES	YES	YES	YES	YES	NO
AGAP005725	Agam:SCR7	SCRB3	SCRB	mTA_Ele11_27193	No	Yes	NO	0	1	7	YES	YES	YES	YES	YES	YES	YES	NO
AGAP005725	Agam:SCR7	SCRB3	SCRB	Outcast_Ele2_7353	No	Yes	NO	0	0	7	YES	YES	YES	YES	YES	YES	YES	NO
AGAP005725	Agam:SCR7	SCRB3	SCRB	tSINE_Ele1_26840	No	No	NO	0	0	7	YES	YES	YES	YES	YES	YES	YES	NO
AGAP005725	Agam:SCR7	SCRB3	SCRB	m3bp_Ele2_8998	No	Yes	YES	3	0	4	NO	NO	YES	YES	YES	NO	YES	NO
AGAP005725	Agam:SCR7	SCRB3	SCRB	tSINE_Ele2_2603_nonREF	No	No	NO	0	0	3	YES	NO	YES	NO	YES	NO	NO	NO
AGAP005725	Agam:SCR7	SCRB3	SCRB	m3bp_Ele7_27194	No	Yes	-	-	-	1	NO	NO	NO	NO	NO	NO	YES	NO
AGAP005725	Agam:SCR7	SCRB3	SCRB	mTA_Ele14_1950	No	No	-	-	-	1	NO	NO	NO	NO	NO	NO	YES	NO
AGAP005910	Agam:APHAG16	APG18B	APHAG	-	-	-	-	-	-	-	-	-	-	-	-	-	-	NO
AGAP005933	Agam:IMDPATH3	IKK2	IKKg	Outcast_Ele2_835	No	No	NO	0	0	7	YES	YES	YES	YES	YES	YES	YES	NO
AGAP005933	Agam:IMDPATH3	IKK2	IKKg	m3bp_Ele15_2426_nonREF	Yes	No	-	-	-	1	NO	NO	NO	YES	NO	NO	NO	NO
AGAP006258	Agam:PPO2	PPO2	PPO	-	-	-	-	-	-	-	-	-	-	-	-	-	-	NO
AGAP006267	Agam:CTL20	CTL6	CTL+OTHER	tSINE_Ele2_5962	No	No	NO	0	0	7	YES	YES	YES	YES	YES	YES	YES	NO
AGAP006342	Agam:PGRP11	PGRPS3	PGRPS	m3bp_Ele2_3155_nonREF	Yes	No	NO	0	0	2	NO	NO	NO	NO	YES	YES	NO	NO
AGAP006343	Agam:PGRP10	PGRPS2	PGRPS	-	-	-	-	-	-	-	-	-	-	-	-	-	-	NO
AGAP006430	Agam:CTL7	CTLGA2	CTLGA	mTA_Ele11_11987	No	No	NO	0	0	7	YES	YES	YES	YES	YES	YES	YES	NO
AGAP006430	Agam:CTL7	CTLGA2	CTLGA	mTA_Ele14_21808	No	Yes	NO	0	0	7	YES	YES	YES	YES	YES	YES	YES	NO
AGAP006473	Agam:IMDPATH7	CASPAR	CASPAR	Loner_Ele1_21842	Yes	No	YES	0	0	4	NO	YES	NO	NO	YES	YES	YES	NO
AGAP006473	Agam:IMDPATH7	CASPAR	CASPAR	Loner_Ele2_21841	Yes	No	YES	0	0	4	NO	YES	NO	NO	YES	YES	YES	NO
AGAP006473	Agam:IMDPATH7	CASPAR	CASPAR	Tc1-mar_Ele5_12022	No	No	NO	0	0	4	NO	YES	NO	NO	YES	YES	YES	NO
AGAP006483	Agam:SPZ2	SPZ2	SPZ	-	-	-	-	-	-	-	-	-	-	-	-	-	-	NO
AGAP006631	Agam:SCR18	SCRASP2	SCRA	mTA_Ele11_21888	No	No	NO	0	1	7	YES	YES	YES	YES	YES	YES	YES	NO
AGAP006722	Agam:AMP7	CEC4	Cecropin	-	-	-	-	-	-	-	-	-	-	-	-	-	-	NO
AGAP006747	Agam:REL2	REL2	REL2	tSINE_Ele1_21921	No	No	NO	0	0	7	YES	YES	YES	YES	YES	YES	YES	NO
AGAP006761	Agam:BGBP6	GNBPA1	GNBPA	-	-	-	-	-	-	-	-	-	-	-	-	-	-	NO
AGAP006909	Agam:SRPN1	SRPN1	SRPN-INHIB	-	-	-	-	-	-	-	-	-	-	-	-	-	-	NO
AGAP006910	Agam:SRPN3	SRPN3	SRPN-INHIB	-	-	-	-	-	-	-	-	-	-	-	-	-	-	NO
AGAP006911	Agam:SRPN2	SRPN2	SRPN-INHIB	tSINE_Ele1_12223	Yes	No	YES	0	0	7	YES	YES	YES	YES	YES	YES	YES	NO
AGAP006914	Agam:FREP8	FREP8	FREP	m8bp_Ele7_12225	Yes	No	YES	0	0	7	YES	YES	YES	YES	YES	YES	YES	NO
AGAP006914	Agam:FREP8	FREP8	FREP	Pao_Bel_Ele7_18	No	No	NO	0	0	7	YES	YES	YES	YES	YES	YES	YES	NO
AGAP006914	Agam:FREP8	FREP8	FREP	RTE_Ele3_591	Yes	No	NO	0	0	7	YES	YES	YES	YES	YES	YES	YES	NO
AGAP006914	Agam:FREP8	FREP8	FREP	tSINE_Ele1_21952	Yes	No	NO	0	0	7	YES	YES	YES	YES	YES	YES	YES	NO
AGAP006939	Agam:SRRP10	ARM1	Armitage	-	-	-	-	-	-	-	-	-	-	-	-	-	-	NO
AGAP006974	Agam:TOLL3	TOLL9	TOLL	m3bp_Ele2_12237	No	Yes	NO	0	0	6	YES	YES	YES	NO	YES	YES	YES	NO
AGAP007020	Agam:PRDX1	TPX5	TPX	hAT_Ele11_21974	No	No	NO	0	0	7	YES	YES	YES	YES	YES	YES	YES	NO
AGAP007020	Agam:PRDX1	TPX5	TPX	hAT_Ele8_12266	Yes	No	YES	0	0	6	YES	YES	YES	NO	YES	YES	YES	NO
AGAP007041	Agam:FREP39	FREP39	FREP	-	-	-	-	-	-	-	-	-	-	-	-	-	-	NO
AGAP007197	Agam:ML10	ML11	ML	-	-	-	-	-	-	-	-	-	-	-	-	-	-	NO
AGAP007199	Agam:AMP3	DEF3	Defensin	tSINE_Ele1_22026	No	No	NO	0	0	7	YES	YES	YES	YES	YES	YES	YES	NO
AGAP007199	Agam:AMP3	DEF3	Defensin	tSINE_Ele2_12345	No	No	NO	0	0	7	YES	YES	YES	YES	YES	YES	YES	NO
AGAP007200	Agam:AMP11	DEF5	Defensin	-	-	-	-	-	-	-	-	-	-	-	-	-	-	NO
AGAP007237	Agam:PRDX11	HPX4	HPX	-	-	-	-	-	-	-	-	-	-	-	-	-	-	NO
AGAP007291	Agam:IAP8	IAP4	IAP	mTA_Ele10_1696	Yes	No	-	-	-	1	NO	NO	NO	NO	NO	NO	YES	NO
AGAP007291	Agam:IAP8	IAP4	IAP	PIF_Ele6_1695	Yes	No	-	-	-	1	NO	NO	NO	NO	NO	NO	YES	NO
AGAP007293	Agam:IAP4	IAP7	IAP	-	-	-	-	-	-	-	-	-	-	-	-	-	-	YES
AGAP007294	Agam:IAP1	IAP1	IAP	-	-	-	-	-	-	-	-	-	-	-	-	-	-	NO
AGAP007296	Agam:APHAG13	APG12	APHAG	-	-	-	-	-	-	-	-	-	-	-	-	-	-	NO
AGAP007343	Agam:LYS2	LYSC2	LYSC	-	-	-	-	-	-	-	-	-	-	-	-	-	-	NO
AGAP007344	Agam:LYS8	LYSC8	LYSC	-	-	-	-	-	-	-	-	-	-	-	-	-	-	NO
AGAP007345	Agam:LYS3	LYSC3	LYSC	-	-	-	-	-	-	-	-	-	-	-	-	-	-	NO
AGAP007346	Agam:LYS5	LYSC5	LYSC	-	-	-	-	-	-	-	-	-	-	-	-	-	-	NO
AGAP007347	Agam:LYS1	LYSC1	LYSC	-	-	-	-	-	-	-	-	-	-	-	-	-	-	NO
AGAP007385	Agam:LYS4	LYSC4	LYSC	-	-	-	-	-	-	-	-	-	-	-	-	-	-	YES
AGAP007386	Agam:LYS7	LYSC7	LYSC	-	-	-	-	-	-	-	-	-	-	-	-	-	-	NO
AGAP007407	Agam:CTL21	CTLMA4	CTLMA	mTA_Ele11_5290	Yes	No	YES	0	0	7	YES	YES	YES	YES	YES	YES	YES	NO
AGAP007408	Agam:CTL22	CTLMA8	CTLMA	m8bp_Ele2_22041	No	No	NO	0	0	6	YES	NO	YES	YES	YES	YES	YES	NO
AGAP007408	Agam:CTL22	CTLMA8	CTLMA	tSINE_Ele1_12371	No	No	NO	0	0	5	YES	NO	NO	YES	YES	YES	YES	NO
AGAP007410	Agam:CTL23	CTLMA5	CTLMA	m8bp_Ele2_22041	No	No	NO	0	0	6	YES	NO	YES	YES	YES	YES	YES	NO
AGAP007410	Agam:CTL23	CTLMA5	CTLMA	RTE_Ele2_12372	Yes	Yes	NO	0	0	6	YES	NO	YES	YES	YES	YES	YES	NO
AGAP007410	Agam:CTL23	CTLMA5	CTLMA	RTE_Ele2_12372	Yes	Yes	YES	0	0	6	YES	NO	YES	YES	YES	YES	YES	NO
AGAP007410	Agam:CTL23	CTLMA5	CTLMA	tSINE_Ele1_12371	No	No	NO	0	0	5	YES	NO	NO	YES	YES	YES	YES	NO
AGAP007411	Agam:CTL24	CTLMA1	CTLMA	-	-	-	-	-	-	-	-	-	-	-	-	-	-	NO
AGAP007412	Agam:CTL3	CTLMA3	CTLMA	-	-	-	-	-	-	-	-	-	-	-	-	-	-	NO
AGAP007415	Agam:ML15	ML12	ML	tSINE_Ele2_22042	No	No	NO	0	0	7	YES	YES	YES	YES	YES	YES	YES	NO
AGAP007497	Agam:SOD5	CuSOD1	SOD-Cu-Zn	-	-	-	-	-	-	-	-	-	-	-	-	-	-	NO
AGAP007543	Agam:PRDX5	TPX3	TPX	-	-	-	-	-	-	-	-	-	-	-	-	-	-	NO
AGAP007691	Agam:SRPN20	SRPN18	SRPN-nonINHIB	-	-	-	-	-	-	-	-	-	-	-	-	-	-	NO
AGAP007692	Agam:SRPN19	SRPN14	SRPN-nonINHIB	-	-	-	-	-	-	-	-	-	-	-	-	-	-	NO
AGAP007693	Agam:SRPN8	SRPN7	SRPN-INHIB	-	-	-	-	-	-	-	-	-	-	-	-	-	-	NO
AGAP007866	Agam:SPZ1	SPZ4	SPZ	-	-	-	-	-	-	-	-	-	-	-	-	-	-	NO
AGAP007873	Agam:APHAG17	TOR	APHAG	-	-	-	-	-	-	-	-	-	-	-	-	-	-	NO
AGAP007938	Agam:TOLLPATH4	CACT	CACT	-	-	-	-	-	-	-	-	-	-	-	-	-	-	NO
AGAP007970	Agam:APHAG15	APG18A	APHAG	hAT_Ele11_15812	No	Yes	NO	0	0	7	YES	YES	YES	YES	YES	YES	YES	NO
AGAP008087	Agam:SRRP6	DROSHA	Drosha	-	-	-	-	-	-	-	-	-	-	-	-	-	-	NO
AGAP008179	Agam:SCR4	SCRBQ3	SCRB	-	-	-	-	-	-	-	-	-	-	-	-	-	-	NO
AGAP008183	Agam:CLIP26	CLIPD2	CLIPD	gypsy_Ele85_1459	No	Yes	NO	0	0	7	YES	YES	YES	YES	YES	YES	YES	NO
AGAP008354	Agam:JAKSTAT2	HOP	HOP	hAT_Ele11_20268	No	Yes	NO	0	0	7	YES	YES	YES	YES	YES	YES	YES	NO
AGAP008354	Agam:JAKSTAT2	HOP	HOP	PIF_Ele6_26483	No	Yes	NO	0	0	7	YES	YES	YES	YES	YES	YES	YES	NO
AGAP008354	Agam:JAKSTAT2	HOP	HOP	piggyBac_Ele5_1461	No	Yes	NO	0	0	4	YES	YES	YES	NO	NO	NO	YES	NO
AGAP008354	Agam:JAKSTAT2	HOP	HOP	hAT_Ele12_1076	No	Yes	NO	0	0	2	NO	NO	YES	NO	NO	NO	YES	NO
AGAP008354	Agam:JAKSTAT2	HOP	HOP	Tc1_Ele18_3796	No	Yes	-	-	-	1	NO	NO	NO	NO	NO	NO	YES	NO
AGAP008354	Agam:JAKSTAT2	HOP	HOP	Tc1-mar_Ele3_3797	No	Yes	-	-	-	1	NO	NO	NO	NO	NO	NO	YES	NO
AGAP008360	Agam:SPZ5	SPZ3	SPZ	mTA_Ele14_23959	No	No	NO	1	2	6	YES	YES	YES	NO	YES	YES	YES	NO
AGAP008364	Agam:TEP3	TEP15	TEP	-	-	-	-	-	-	-	-	-	-	-	-	-	-	NO
AGAP008366	Agam:TEP2	TEP2	TEP	-	-	-	-	-	-	-	-	-	-	-	-	-	-	NO
AGAP008407	Agam:TEP1	TEP13	TEP	m8bp_Ele6_15870	No	No	NO	0	2	7	YES	YES	YES	YES	YES	YES	YES	NO
AGAP008497	Agam:APHAG5	APG4B	APHAG	-	-	-	-	-	-	-	-	-	-	-	-	-	-	NO
AGAP008637	Agam:APHAG8	APG7A	APHAG	-	-	-	-	-	-	-	-	-	-	-	-	-	-	NO
AGAP008645	Agam:AMP9	GAM1	Gambicin	tSINE_Ele1_16019	No	No	NO	0	0	6	YES	YES	YES	YES	NO	YES	YES	NO
AGAP008844	Agam:GALE2	GALE1	GALE	m3bp_Ele11_16196	Yes	No	YES	0	0	7	YES	YES	YES	YES	YES	YES	YES	YES
AGAP008862	Agam:SRRP18	AGO3	Argonaute	Tc1-mar_Ele10_1003	Yes	No	NO	0	0	7	YES	YES	YES	YES	YES	YES	YES	NO
AGAP008862	Agam:SRRP18	AGO3	Argonaute	Tc1-mar_Ele8_24245	No	No	NO	0	0	7	YES	YES	YES	YES	YES	YES	YES	NO
AGAP008862	Agam:SRRP18	AGO3	Argonaute	PIF_Ele8_8203	No	Yes	NO	0	0	6	YES	YES	YES	YES	YES	NO	YES	NO
AGAP008862	Agam:SRRP18	AGO3	Argonaute	tSINE_Ele1_8204	No	Yes	NO	0	0	4	NO	NO	YES	YES	YES	NO	YES	NO
AGAP008862	Agam:SRRP18	AGO3	Argonaute	mTA_Ele14_4213	Yes	No	-	-	-	1	NO	NO	NO	NO	NO	NO	YES	NO
AGAP008862	Agam:SRRP18	AGO3	Argonaute	tSINE_Ele1_23336_nonREF	No	Yes	-	-	-	1	NO	NO	NO	NO	YES	NO	NO	NO
AGAP009033	Agam:PRDX9	HPX2	HPX	m3bp_Ele15_24367	No	No	NO	0	0	7	YES	YES	YES	YES	YES	YES	YES	YES
AGAP009143	Agam:SCR16	SCRAC1	SCRA	Tc1_Ele18_6102_nonREF	No	No	-	-	-	1	NO	NO	NO	NO	YES	NO	NO	NO
AGAP009143	Agam:SCR16	SCRAC1	SCRA	Tc1_Ele19_6156_nonREF	No	Yes	-	-	-	1	YES	NO	NO	NO	NO	NO	NO	NO
AGAP009166	Agam:IMDPATH4	IKK1	IKKb	otherMITEs_Eles8_9635	No	No	YES	0	0	3	NO	NO	NO	YES	YES	NO	YES	NO
AGAP009184	Agam:FREP7	FREP7	FREP	m4bp_Ele2_16422	No	No	NO	0	0	7	YES	YES	YES	YES	YES	YES	YES	NO
AGAP009184	Agam:FREP7	FREP7	FREP	mTA_Ele12_16420	Yes	No	YES	0	0	7	YES	YES	YES	YES	YES	YES	YES	NO
AGAP009184	Agam:FREP7	FREP7	FREP	RTE_Ele2_16418	Yes	No	NO	0	0	7	YES	YES	YES	YES	YES	YES	YES	NO
AGAP009184	Agam:FREP7	FREP7	FREP	RTE_Ele2_16419	Yes	No	YES	0	0	7	YES	YES	YES	YES	YES	YES	YES	NO
AGAP009184	Agam:FREP7	FREP7	FREP	tSINE_Ele2_16421	No	No	NO	0	0	7	YES	YES	YES	YES	YES	YES	YES	NO
AGAP009212	Agam:SRPN7	SRPN6	SRPN-INHIB	-	-	-	-	-	-	-	-	-	-	-	-	-	-	NO
AGAP009213	Agam:SRPN15	SRPN16	SRPN-INHIB	CR1_Ele31_24421	No	No	NO	0	0	5	YES	YES	NO	YES	NO	YES	YES	NO
AGAP009214	Agam:CLIP2	CLIPB11	CLIPB	-	-	-	-	-	-	-	-	-	-	-	-	-	-	NO
AGAP009215	Agam:CLIP36	CLIPB18	CLIPB	Pao_Bel_Ele57_16444	No	No	NO	0	0	7	YES	YES	YES	YES	YES	YES	YES	NO
AGAP009215	Agam:CLIP36	CLIPB18	CLIPB	tSINE_Ele1_16443	No	No	NO	0	0	7	YES	YES	YES	YES	YES	YES	YES	NO
AGAP009217	Agam:CLIP1	CLIPB12	CLIPB	gambol_Ele2_24423	Yes	No	YES	0	0	7	YES	YES	YES	YES	YES	YES	YES	NO
AGAP009217	Agam:CLIP1	CLIPB12	CLIPB	tSINE_Ele1_16447	Yes	No	YES	1	0	7	YES	YES	YES	YES	YES	YES	YES	NO
AGAP009221	Agam:SRPN6	SRPN5	SRPN-INHIB	-	-	-	-	-	-	-	-	-	-	-	-	-	-	NO
AGAP009316	Agam:CTL10	CTL10	CTL	-	-	-	-	-	-	-	-	-	-	-	-	-	-	NO
AGAP009509	Agam:SRRP19	PIWI	PIWI	-	-	-	-	-	-	-	-	-	-	-	-	-	-	NO
AGAP009515	Agam:REL1	REL1	REL1	gambol_Ele2_6889_nonREF	No	No	-	-	-	1	NO	NO	NO	YES	NO	NO	NO	NO
AGAP009556	Agam:FREP50	FREP50	FREP	CR1_Ele3_6326_nonREF	No	Yes	NO	0	0	2	NO	NO	YES	NO	YES	NO	NO	NO
AGAP009556	Agam:FREP50	FREP50	FREP	LTR_Ele1_6409_nonREF	No	No	NO	0	0	2	YES	NO	NO	NO	YES	NO	NO	NO
AGAP009556	Agam:FREP50	FREP50	FREP	m8bp_Ele8_6496_nonREF	No	Yes	-	-	-	1	NO	NO	NO	NO	YES	NO	NO	NO
AGAP009556	Agam:FREP50	FREP50	FREP	PIF_Ele8_6030_nonREF	No	Yes	-	-	-	1	YES	NO	NO	NO	NO	NO	NO	NO
AGAP009781	Agam:SRRP5	LOQS	Loquacious	mar_Ele29_16759	No	No	NO	0	0	6	YES	YES	YES	YES	NO	YES	YES	NO
AGAP009781	Agam:SRRP5	LOQS	Loquacious	mTA_Ele29_24635	No	No	NO	0	0	6	YES	YES	YES	YES	NO	YES	YES	NO
AGAP009781	Agam:SRRP5	LOQS	Loquacious	Tc1-mar_Ele10_16760	No	No	NO	0	0	6	YES	YES	YES	YES	NO	YES	YES	NO
AGAP009844	Agam:CLIP13	CLIPB15	CLIPB	-	-	-	-	-	-	-	-	-	-	-	-	-	-	NO
AGAP009887	Agam:SRRP9	R2D2	R2D2	mTA_Ele19_3982	No	No	-	-	-	1	NO	NO	NO	NO	NO	NO	YES	YES
AGAP009978	Agam:PRDX24	DUOX	HPX	m8bp_Ele7_24729	No	No	NO	0	0	7	YES	YES	YES	YES	YES	YES	YES	NO
AGAP009978	Agam:PRDX24	DUOX	HPX	otherMITEs_Eles25_6396	No	Yes	NO	0	0	7	YES	YES	YES	YES	YES	YES	YES	NO
AGAP009978	Agam:PRDX24	DUOX	HPX	tSINE_Ele2_24730	No	Yes	NO	0	0	7	YES	YES	YES	YES	YES	YES	YES	NO
AGAP009978	Agam:PRDX24	DUOX	HPX	m3bp_Ele21_16842	No	No	YES	0	0	5	YES	NO	YES	YES	NO	YES	YES	NO
AGAP010083	Agam:JAKSTAT1	DOME	DOME	-	-	-	-	-	-	-	-	-	-	-	-	-	-	NO
AGAP010132	Agam:SCR2	SCRBQ1	SCRB	gypsy_Ele61_3911	No	No	-	-	-	1	NO	NO	NO	NO	NO	NO	YES	NO
AGAP010133	Agam:SCR3	SCRBQ2	SCRB	copia_Ele20_24778	No	No	NO	1	2	6	YES	YES	NO	YES	YES	YES	YES	NO
AGAP010133	Agam:SCR3	SCRBQ2	SCRB	m8bp_Ele13_27052	No	No	NO	0	0	6	YES	YES	NO	YES	YES	YES	YES	NO
AGAP010133	Agam:SCR3	SCRBQ2	SCRB	m3bp_Ele3_24781	No	No	NO	0	0	3	YES	YES	NO	NO	NO	NO	YES	NO
AGAP010133	Agam:SCR3	SCRBQ2	SCRB	mTA_Ele15_23880_nonREF	No	No	NO	0	0	3	YES	NO	NO	NO	YES	YES	NO	NO
AGAP010133	Agam:SCR3	SCRBQ2	SCRB	mTA_Ele9_24780	No	No	NO	0	0	3	YES	YES	NO	NO	NO	NO	YES	NO
AGAP010133	Agam:SCR3	SCRBQ2	SCRB	mTA_Ele15_24779	No	No	NO	0	0	2	NO	YES	NO	NO	NO	NO	YES	NO
AGAP010133	Agam:SCR3	SCRBQ2	SCRB	mTA_Ele29_8338	Yes	No	NO	0	0	2	NO	NO	NO	NO	YES	NO	YES	NO
AGAP010133	Agam:SCR3	SCRBQ2	SCRB	m8bp_Ele8_6153_nonREF	Yes	No	-	-	-	1	NO	NO	NO	NO	NO	YES	NO	NO
AGAP010133	Agam:SCR3	SCRBQ2	SCRB	PIF_Ele12_3910	Yes	No	-	-	-	1	NO	NO	NO	NO	NO	NO	YES	NO
AGAP010193	Agam:CTL8	CTLGA3	CTLGA	-	-	-	-	-	-	-	-	-	-	-	-	-	-	NO
AGAP010347	Agam:SOD2	CuSOD3-A	SOD-Cu-Zn	-	-	-	-	-	-	-	-	-	-	-	-	-	-	NO
AGAP010423	Agam:JAKSTAT3	STAT1	STAT	mTA_Ele5_26914	Yes	No	YES	1	0	7	YES	YES	YES	YES	YES	YES	YES	NO
AGAP010423	Agam:JAKSTAT3	STAT1	STAT	otherMITEs_Eles3_20935	Yes	No	YES	0	0	7	YES	YES	YES	YES	YES	YES	YES	NO
AGAP010517	Agam:SOD1	MnSOD1	SOD-Mn-Fe	-	-	-	-	-	-	-	-	-	-	-	-	-	-	NO
AGAP010636	Agam:TOLL6	TOLL1B	TOLL	mTA_Ele5_8814	No	No	NO	0	0	4	YES	NO	NO	YES	YES	NO	YES	NO
AGAP010636	Agam:TOLL6	TOLL1B	TOLL	gypsy_Ele8_6187	Yes	No	YES	1	0	3	YES	NO	NO	YES	NO	NO	YES	NO
AGAP010636	Agam:TOLL6	TOLL1B	TOLL	mTA_Ele5_5280_nonREF	No	No	NO	0	0	3	YES	NO	NO	YES	YES	NO	NO	NO
AGAP010669	Agam:TOLL10	TOLL5B	TOLL	hAT_Ele11_23185	No	Yes	NO	0	0	7	YES	YES	YES	YES	YES	YES	YES	NO
AGAP010669	Agam:TOLL10	TOLL5B	TOLL	I_Ele3_23182	No	Yes	NO	0	0	7	YES	YES	YES	YES	YES	YES	YES	NO
AGAP010669	Agam:TOLL10	TOLL5B	TOLL	I_Ele4_9437	No	Yes	NO	0	0	7	YES	YES	YES	YES	YES	YES	YES	NO
AGAP010669	Agam:TOLL10	TOLL5B	TOLL	I_Ele7_14814	No	Yes	NO	0	0	7	YES	YES	YES	YES	YES	YES	YES	NO
AGAP010669	Agam:TOLL10	TOLL5B	TOLL	Jockey_Ele13_1221	No	No	NO	0	0	7	YES	YES	YES	YES	YES	YES	YES	NO
AGAP010669	Agam:TOLL10	TOLL5B	TOLL	m4bp_Ele2_14815	No	Yes	NO	0	0	7	YES	YES	YES	YES	YES	YES	YES	NO
AGAP010669	Agam:TOLL10	TOLL5B	TOLL	mTA_Ele31_23183	No	Yes	NO	0	0	7	YES	YES	YES	YES	YES	YES	YES	NO
AGAP010669	Agam:TOLL10	TOLL5B	TOLL	mTA_Ele7_23186	No	Yes	NO	0	0	7	YES	YES	YES	YES	YES	YES	YES	NO
AGAP010669	Agam:TOLL10	TOLL5B	TOLL	PIF_Ele11_14819	Yes	No	YES	0	0	7	YES	YES	YES	YES	YES	YES	YES	NO
AGAP010669	Agam:TOLL10	TOLL5B	TOLL	PIF_Ele5_14813	No	No	NO	0	0	7	YES	YES	YES	YES	YES	YES	YES	NO
AGAP010669	Agam:TOLL10	TOLL5B	TOLL	PIF_Ele6_23184	No	Yes	NO	0	0	7	YES	YES	YES	YES	YES	YES	YES	NO
AGAP010669	Agam:TOLL10	TOLL5B	TOLL	Tc1-mar_Ele8_14817	No	Yes	NO	0	0	7	YES	YES	YES	YES	YES	YES	YES	NO
AGAP010669	Agam:TOLL10	TOLL5B	TOLL	Tc1-mar_Ele8_14818	No	Yes	NO	0	0	7	YES	YES	YES	YES	YES	YES	YES	NO
AGAP010669	Agam:TOLL10	TOLL5B	TOLL	tSINE_Ele1_14816	No	Yes	NO	0	0	7	YES	YES	YES	YES	YES	YES	YES	NO
AGAP010669	Agam:TOLL10	TOLL5B	TOLL	tSINE_Ele1_14812	No	Yes	NO	0	0	6	YES	YES	YES	NO	YES	YES	YES	NO
AGAP010669	Agam:TOLL10	TOLL5B	TOLL	m3bp_Ele3_23187	Yes	No	NO	0	0	5	NO	YES	YES	NO	YES	YES	YES	NO
AGAP010669	Agam:TOLL10	TOLL5B	TOLL	m3bp_Ele3_23145_nonREF	No	No	-	-	-	1	NO	NO	NO	NO	YES	NO	NO	NO
AGAP010669	Agam:TOLL10	TOLL5B	TOLL	tSINE_Ele1_24756_nonREF	No	No	-	-	-	1	NO	NO	NO	YES	NO	NO	NO	NO
AGAP010709	Agam:CTL13	CTL2	CTL	gypsy_Ele67_9443	No	No	NO	0	0	6	YES	YES	YES	YES	YES	NO	YES	NO
AGAP010709	Agam:CTL13	CTL2	CTL	gypsy_Ele68_7975	No	No	NO	0	0	6	YES	YES	YES	YES	YES	NO	YES	NO
AGAP010709	Agam:CTL13	CTL2	CTL	gypsy_Ele85_9444	No	No	NO	0	0	6	YES	YES	YES	YES	YES	NO	YES	NO
AGAP010709	Agam:CTL13	CTL2	CTL	RTE_Ele2_9445	No	No	NO	0	0	6	YES	YES	YES	YES	YES	NO	YES	NO
AGAP010709	Agam:CTL13	CTL2	CTL	tSINE_Ele2_9446	No	No	NO	0	0	6	YES	YES	YES	YES	YES	NO	YES	NO
AGAP010709	Agam:CTL13	CTL2	CTL	mTA_Ele21_8931	No	No	NO	0	0	5	YES	YES	YES	NO	YES	NO	YES	NO
AGAP010709	Agam:CTL13	CTL2	CTL	RTE_Ele3_8930	No	No	NO	0	0	5	YES	YES	YES	NO	YES	NO	YES	NO
AGAP010709	Agam:CTL13	CTL2	CTL	CR1_Ele29_3593	No	No	-	-	-	1	NO	NO	NO	NO	NO	NO	YES	NO
AGAP010709	Agam:CTL13	CTL2	CTL	Pao_Bel_Ele53_5705_nonREF	No	No	-	-	-	1	YES	NO	NO	NO	NO	NO	NO	NO
AGAP010709	Agam:CTL13	CTL2	CTL	Pao_Bel_Ele56_3592	No	No	-	-	-	1	NO	NO	NO	NO	NO	NO	YES	NO
AGAP010709	Agam:CTL13	CTL2	CTL	Pao_Bel_Ele64_3594	No	No	-	-	-	1	NO	NO	NO	NO	NO	NO	YES	NO
AGAP010709	Agam:CTL13	CTL2	CTL	tSINE_Ele1_3591	No	No	-	-	-	1	NO	NO	NO	NO	NO	NO	YES	NO
AGAP010731	Agam:CLIP18	CLIPA8	CLIPA	-	-	-	-	-	-	-	-	-	-	-	-	-	-	NO
AGAP010734	Agam:PRDX10	HPX1	HPX	CR1_Ele23_20167	No	No	NO	0	0	6	YES	YES	YES	NO	YES	YES	YES	NO
AGAP010734	Agam:PRDX10	HPX1	HPX	RTE_Ele2_26335	No	No	NO	0	0	6	YES	YES	YES	NO	YES	YES	YES	NO
AGAP010735	Agam:PRDX25	HPX13	HPX	-	-	-	-	-	-	-	-	-	-	-	-	-	-	NO
AGAP010761	Agam:FREP17	FREP17	FREP	P_Ele5_23221	No	No	NO	0	0	7	YES	YES	YES	YES	YES	YES	YES	NO
AGAP010761	Agam:FREP17	FREP17	FREP	hAT_Ele8_23220	No	No	NO	0	0	4	NO	YES	YES	YES	NO	NO	YES	NO
AGAP010763	Agam:FREP21	FREP21	FREP	-	-	-	-	-	-	-	-	-	-	-	-	-	-	NO
AGAP010772	Agam:FREP20	FREP20	FREP	-	-	-	-	-	-	-	-	-	-	-	-	-	-	NO
AGAP010774	Agam:FREP27	FREP27	FREP	CR1_Ele19_14903	Yes	No	YES	0	0	7	YES	YES	YES	YES	YES	YES	YES	NO
AGAP010774	Agam:FREP27	FREP27	FREP	mTA_Ele21_3583	No	No	-	-	-	1	NO	NO	NO	NO	NO	NO	YES	NO
AGAP010775	Agam:FREP26	FREP26	FREP	CR1_Ele31_7988	No	No	NO	0	0	3	NO	NO	YES	NO	YES	NO	YES	NO
AGAP010811	Agam:FREP19	FREP19	FREP	mTA_Ele12_14937	Yes	No	YES	0	0	7	YES	YES	YES	YES	YES	YES	YES	NO
AGAP010811	Agam:FREP19	FREP19	FREP	mTA_Ele16_14938	No	No	NO	0	0	7	YES	YES	YES	YES	YES	YES	YES	NO
AGAP010812	Agam:TEP6	TEP4	TEP	-	-	-	-	-	-	-	-	-	-	-	-	-	-	NO
AGAP010813	Agam:TEP13	TEP6	TEP	m3bp_Ele3_6197	Yes	No	YES	0	0	4	NO	YES	YES	YES	NO	NO	YES	NO
AGAP010813	Agam:TEP13	TEP6	TEP	m3bp_Ele3_6198	Yes	No	NO	0	0	4	NO	YES	YES	YES	NO	NO	YES	NO
AGAP010813	Agam:TEP13	TEP6	TEP	mTA_Ele3_6764	Yes	No	NO	0	0	4	NO	YES	YES	YES	NO	NO	YES	NO
AGAP010814	Agam:TEP5	TEP5	TEP	CR1_Ele4_6765	No	No	NO	0	0	4	NO	YES	YES	YES	NO	NO	YES	NO
AGAP010814	Agam:TEP5	TEP5	TEP	Jockey_Ele11_6199	No	No	NO	0	0	4	NO	YES	YES	YES	NO	NO	YES	NO
AGAP010814	Agam:TEP5	TEP5	TEP	m2bp_Ele1_6201	No	No	NO	0	0	4	NO	YES	YES	YES	NO	NO	YES	NO
AGAP010814	Agam:TEP5	TEP5	TEP	otherMITEs_Eles4_6200	No	No	NO	0	0	4	NO	YES	YES	YES	NO	NO	YES	NO
AGAP010814	Agam:TEP5	TEP5	TEP	Pao_Bel_Ele29_966_nonREF	No	No	-	-	-	1	NO	YES	NO	NO	NO	NO	NO	NO
AGAP010815	Agam:TEP7	TEP1	TEP	CR1_Ele20_14943	Yes	No	YES	0	0	7	YES	YES	YES	YES	YES	YES	YES	NO
AGAP010815	Agam:TEP7	TEP1	TEP	Pao_Bel_Ele25_9452	No	No	NO	2	3	3	NO	YES	NO	NO	YES	NO	YES	NO
AGAP010816	Agam:TEP10	TEP3	TEP	m8bp_Ele7_23251	No	No	NO	0	0	7	YES	YES	YES	YES	YES	YES	YES	NO
AGAP010816	Agam:TEP10	TEP3	TEP	mTA_Ele31_14944	No	No	NO	0	0	7	YES	YES	YES	YES	YES	YES	YES	NO
AGAP010816	Agam:TEP10	TEP3	TEP	Tc1-mar_Ele8_14945	No	No	NO	0	0	7	YES	YES	YES	YES	YES	YES	YES	NO
AGAP010816	Agam:TEP10	TEP3	TEP	piggyBac_Ele5_6202	Yes	No	YES	0	1	3	NO	YES	NO	YES	NO	NO	YES	NO
AGAP010819	Agam:TEP8	TEP10	TEP	otherMITEs_Eles22_14951	Yes	No	NO	0	0	6	YES	NO	YES	YES	YES	YES	YES	NO
AGAP010830	Agam:TEP4	TEP9	TEP	m8bp_Ele6_23261	No	No	NO	0	0	6	YES	NO	YES	YES	YES	YES	YES	NO
AGAP010830	Agam:TEP4	TEP9	TEP	tSINE_Ele1_14964	No	No	NO	0	0	6	YES	NO	YES	YES	YES	YES	YES	NO
AGAP010830	Agam:TEP4	TEP9	TEP	tSINE_Ele2_14963	Yes	No	YES	0	0	6	YES	YES	NO	YES	YES	YES	YES	NO
AGAP010830	Agam:TEP4	TEP9	TEP	CR1_Ele23_14965	No	No	NO	0	2	5	YES	NO	YES	NO	YES	YES	YES	NO
AGAP010833	Agam:CLIP17	CLIPB14	CLIPB	-	-	-	-	-	-	-	-	-	-	-	-	-	-	NO
AGAP010899	Agam:PRDX18	HPX11	HPX	m8bp_Ele6_23298	No	No	NO	0	0	7	YES	YES	YES	YES	YES	YES	YES	NO
AGAP010939	Agam:APHAG6	APG5	APHAG	gambol_Ele7_23320	No	No	NO	0	0	7	YES	YES	YES	YES	YES	YES	YES	NO
AGAP010939	Agam:APHAG6	APG5	APHAG	Jockey_Ele11_20945	No	No	NO	0	0	7	YES	YES	YES	YES	YES	YES	YES	NO
AGAP010939	Agam:APHAG6	APG5	APHAG	L2_Ele3_15022	No	No	NO	0	0	7	YES	YES	YES	YES	YES	YES	YES	NO
AGAP010939	Agam:APHAG6	APG5	APHAG	m3bp_Ele24_3548	No	No	NO	0	0	7	YES	YES	YES	YES	YES	YES	YES	NO
AGAP010939	Agam:APHAG6	APG5	APHAG	m8bp_Ele7_15019	No	No	NO	0	0	7	YES	YES	YES	YES	YES	YES	YES	NO
AGAP010939	Agam:APHAG6	APG5	APHAG	mTA_Ele11_15021	No	No	NO	0	0	7	YES	YES	YES	YES	YES	YES	YES	NO
AGAP010939	Agam:APHAG6	APG5	APHAG	mTA_Ele11_20192	No	No	NO	0	0	7	YES	YES	YES	YES	YES	YES	YES	NO
AGAP010939	Agam:APHAG6	APG5	APHAG	mTA_Ele21_23318	No	No	NO	0	0	7	YES	YES	YES	YES	YES	YES	YES	NO
AGAP010939	Agam:APHAG6	APG5	APHAG	otherMITEs_Eles16_15020	No	No	NO	0	0	7	YES	YES	YES	YES	YES	YES	YES	NO
AGAP010939	Agam:APHAG6	APG5	APHAG	otherMITEs_Eles19_26360	No	No	NO	0	0	7	YES	YES	YES	YES	YES	YES	YES	NO
AGAP010939	Agam:APHAG6	APG5	APHAG	Pao_Bel_Ele73_660	No	No	NO	0	0	7	YES	YES	YES	YES	YES	YES	YES	NO
AGAP010939	Agam:APHAG6	APG5	APHAG	Tc1-mar_Ele10_23321	Yes	No	NO	0	0	7	YES	YES	YES	YES	YES	YES	YES	NO
AGAP010939	Agam:APHAG6	APG5	APHAG	tSINE_Ele2_23319	No	No	NO	0	0	7	YES	YES	YES	YES	YES	YES	YES	NO
AGAP010939	Agam:APHAG6	APG5	APHAG	tSINE_Ele1_6770	No	No	NO	0	0	5	YES	NO	YES	YES	NO	YES	YES	NO
AGAP010939	Agam:APHAG6	APG5	APHAG	piggyBac_Ele6_23322	Yes	No	NO	1	0	4	NO	YES	YES	NO	NO	YES	YES	NO
AGAP010939	Agam:APHAG6	APG5	APHAG	mTA_Ele13_6209	No	No	NO	0	0	2	NO	NO	NO	YES	NO	NO	YES	NO
AGAP010939	Agam:APHAG6	APG5	APHAG	Pao_Bel_Ele73_5179_nonREF	No	No	NO	0	0	2	NO	YES	NO	NO	NO	YES	NO	NO
AGAP010968	Agam:CLIP5	CLIPA9	CLIPA	-	-	-	-	-	-	-	-	-	-	-	-	-	-	YES
AGAP011054	Agam:PRDX4	TPX2	TPX	mTA_Ele13_6772	Yes	No	YES	2	3	2	NO	NO	NO	YES	NO	NO	YES	NO
AGAP011054	Agam:PRDX4	TPX2	TPX	mTA_Ele14_6212	Yes	No	YES	2	2	2	NO	NO	NO	YES	NO	NO	YES	NO
AGAP011054	Agam:PRDX4	TPX2	TPX	mTA_Ele9_6211	Yes	No	YES	2	2	2	NO	NO	NO	YES	NO	NO	YES	NO
AGAP011186	Agam:TOLL8	TOLL11	TOLL	-	-	-	-	-	-	-	-	-	-	-	-	-	-	NO
AGAP011187	Agam:TOLL9	TOLL10	TOLL	-	-	-	-	-	-	-	-	-	-	-	-	-	-	NO
AGAP011197	Agam:FREP13	FREP13	FREP	tSINE_Ele1_161	No	No	NO	0	0	7	YES	YES	YES	YES	YES	YES	YES	NO
AGAP011197	Agam:FREP13	FREP13	FREP	hAT_Ele11_15111	Yes	No	YES	0	0	3	YES	NO	NO	NO	NO	YES	YES	NO
AGAP011204	Agam:SRRP20	AUB	Aubergine	tSINE_Ele1_23400	No	Yes	NO	0	0	7	YES	YES	YES	YES	YES	YES	YES	YES
AGAP011204	Agam:SRRP20	AUB	Aubergine	copia_Ele21_3495	Yes	No	-	-	-	1	NO	NO	NO	NO	NO	NO	YES	YES
AGAP011204	Agam:SRRP20	AUB	Aubergine	m2bp_Ele10_3497	Yes	No	-	-	-	1	NO	NO	NO	NO	NO	NO	YES	YES
AGAP011216	Agam:PRDX17	HPX16	HPX	m3bp_Ele4_23412	Yes	No	YES	0	0	7	YES	YES	YES	YES	YES	YES	YES	NO
AGAP011228	Agam:FREP24	FREP24	FREP	m3bp_Ele15_5231_nonREF	No	No	-	-	-	1	NO	NO	NO	YES	NO	NO	NO	NO
AGAP011230	Agam:FREP58	FREP58	FREP	-	-	-	-	-	-	-	-	-	-	-	-	-	-	NO
AGAP011276	Agam:FREP29	FREP29	FREP	Jockey_Ele11_27433	Yes	No	YES	0	0	5	NO	NO	YES	YES	YES	YES	YES	NO
AGAP011276	Agam:FREP29	FREP29	FREP	copia_Ele27_20206	No	No	YES	0	1	4	YES	NO	YES	NO	NO	YES	YES	NO
AGAP011276	Agam:FREP29	FREP29	FREP	mTA_Ele15_27431	No	No	NO	0	0	3	NO	NO	YES	NO	NO	YES	YES	NO
AGAP011276	Agam:FREP29	FREP29	FREP	mTA_Ele15_27432	No	No	NO	0	0	3	NO	NO	YES	NO	NO	YES	YES	NO
AGAP011276	Agam:FREP29	FREP29	FREP	otherMITEs_Eles4_20205	No	No	NO	0	0	3	NO	NO	YES	NO	NO	YES	YES	NO
AGAP011276	Agam:FREP29	FREP29	FREP	RTE_Ele2_6222	Yes	No	YES	1	0	3	NO	NO	YES	YES	NO	NO	YES	NO
AGAP011276	Agam:FREP29	FREP29	FREP	m3bp_Ele8_26383	No	No	YES	0	1	2	NO	NO	YES	NO	NO	NO	YES	NO
AGAP011277	Agam:FREP6	FREP6	FREP	Jockey_Ele11_27433	No	No	YES	0	0	5	NO	NO	YES	YES	YES	YES	YES	NO
AGAP011277	Agam:FREP6	FREP6	FREP	RTE_Ele2_6222	No	No	NO	0	0	3	NO	NO	YES	YES	NO	NO	YES	NO
AGAP011277	Agam:FREP6	FREP6	FREP	m3bp_Ele2_5568	No	No	NO	0	0	2	NO	NO	YES	NO	NO	NO	YES	NO
AGAP011287	Agam:GALE5	GALE5	GALE	-	-	-	-	-	-	-	-	-	-	-	-	-	-	NO
AGAP011294	Agam:AMP1	DEF1	Defensin	-	-	-	-	-	-	-	-	-	-	-	-	-	-	YES
AGAP011307	Agam:FREP3	FREP3	FREP	I_Ele5_15168	Yes	No	NO	0	1	7	YES	YES	YES	YES	YES	YES	YES	NO
AGAP011307	Agam:FREP3	FREP3	FREP	L2_Ele3_23450	No	No	YES	0	0	6	NO	YES	YES	YES	YES	YES	YES	NO
AGAP011537	Agam:SRRP4	AGO2	Argonaute	-	-	-	-	-	-	-	-	-	-	-	-	-	-	NO
AGAP011552	Agam:APHAG18	DEBCL	APHAG	m4bp_Ele2_23640	Yes	No	NO	0	0	7	YES	YES	YES	YES	YES	YES	YES	NO
AGAP011552	Agam:APHAG18	DEBCL	APHAG	mTA_Ele11_15400	No	No	NO	0	5	7	YES	YES	YES	YES	YES	YES	YES	NO
AGAP011552	Agam:APHAG18	DEBCL	APHAG	mTA_Ele7_23641	Yes	No	NO	0	0	7	YES	YES	YES	YES	YES	YES	YES	NO
AGAP011582	Agam:APHAG3	APG3	APHAG	RTE_Ele1_23659	No	No	NO	0	0	7	YES	YES	YES	YES	YES	YES	YES	NO
AGAP011582	Agam:APHAG3	APG3	APHAG	RTE_Ele2_23658	No	No	NO	0	1	7	YES	YES	YES	YES	YES	YES	YES	NO
AGAP011582	Agam:APHAG3	APG3	APHAG	RTE_Ele3_15417	No	No	NO	0	0	7	YES	YES	YES	YES	YES	YES	YES	NO
AGAP011693	Agam:CASP5	CASPL1	CASPL	mTA_Ele21_6261	Yes	No	YES	0	0	4	NO	YES	YES	YES	NO	NO	YES	NO
AGAP011693	Agam:CASP5	CASPL1	CASPL	RTE_Ele2_1073	No	No	NO	0	0	4	NO	YES	YES	NO	YES	NO	YES	NO
AGAP011693	Agam:CASP5	CASPL1	CASPL	mTA_Ele19_3218	Yes	No	-	-	-	1	NO	NO	NO	NO	NO	NO	YES	NO
AGAP011693	Agam:CASP5	CASPL1	CASPL	mTA_Ele31_5654_nonREF	Yes	No	-	-	-	1	NO	NO	NO	YES	NO	NO	NO	NO
AGAP011717	Agam:SRRP3	AGO1	Argonaute	CR1_Ele12_20952	No	No	NO	0	0	7	YES	YES	YES	YES	YES	YES	YES	YES
AGAP011717	Agam:SRRP3	AGO1	Argonaute	CR1_Ele30_23711	No	No	NO	0	0	7	YES	YES	YES	YES	YES	YES	YES	YES
AGAP011717	Agam:SRRP3	AGO1	Argonaute	m3bp_Ele15_23710	No	No	NO	0	0	7	YES	YES	YES	YES	YES	YES	YES	YES
AGAP011717	Agam:SRRP3	AGO1	Argonaute	mTA_Ele23_23712	No	No	NO	0	0	7	YES	YES	YES	YES	YES	YES	YES	YES
AGAP011717	Agam:SRRP3	AGO1	Argonaute	mTA_Ele23_23713	No	No	NO	0	0	7	YES	YES	YES	YES	YES	YES	YES	YES
AGAP011717	Agam:SRRP3	AGO1	Argonaute	mTA_Ele7_15481	No	No	NO	0	0	7	YES	YES	YES	YES	YES	YES	YES	YES
AGAP011717	Agam:SRRP3	AGO1	Argonaute	mTA_Ele7_15482	No	No	NO	0	0	7	YES	YES	YES	YES	YES	YES	YES	YES
AGAP011717	Agam:SRRP3	AGO1	Argonaute	mTA_Ele7_15483	No	No	NO	0	0	7	YES	YES	YES	YES	YES	YES	YES	YES
AGAP011717	Agam:SRRP3	AGO1	Argonaute	RTE_Ele2_10240	No	No	NO	0	0	7	YES	YES	YES	YES	YES	YES	YES	YES
AGAP011717	Agam:SRRP3	AGO1	Argonaute	tSINE_Ele1_15484	No	No	NO	0	0	7	YES	YES	YES	YES	YES	YES	YES	YES
AGAP011717	Agam:SRRP3	AGO1	Argonaute	tSINE_Ele2_23709	No	No	NO	0	0	7	YES	YES	YES	YES	YES	YES	YES	YES
AGAP011717	Agam:SRRP3	AGO1	Argonaute	m3bp_Ele2_27488	No	No	NO	0	0	6	YES	YES	YES	YES	YES	NO	YES	YES
AGAP011717	Agam:SRRP3	AGO1	Argonaute	mTA_Ele3_8097	No	No	NO	0	0	6	YES	YES	YES	YES	YES	NO	YES	YES
AGAP011717	Agam:SRRP3	AGO1	Argonaute	mTA_Ele31_350	No	No	NO	0	0	6	YES	YES	YES	YES	YES	NO	YES	YES
AGAP011717	Agam:SRRP3	AGO1	Argonaute	mTA_Ele31_9535	No	No	NO	1	0	6	YES	YES	YES	YES	YES	NO	YES	YES
AGAP011717	Agam:SRRP3	AGO1	Argonaute	mTA_Ele13_6045_nonREF	No	No	-	-	-	1	NO	NO	NO	YES	NO	NO	NO	YES
AGAP011780	Agam:CLIP20	CLIPA4	CLIPA	tSINE_Ele2_23755	No	No	NO	0	0	7	YES	YES	YES	YES	YES	YES	YES	YES
AGAP011781	Agam:CLIP33	CLIPA12	CLIPA	Tc1_Ele18_26452	Yes	No	YES	0	0	7	YES	YES	YES	YES	YES	YES	YES	NO
AGAP011783	Agam:CLIP30	CLIPA13	CLIPA	mTA_Ele24_15539	Yes	No	NO	0	0	7	YES	YES	YES	YES	YES	YES	YES	NO
AGAP011785	Agam:CLIP31	CLIPE6	CLIPE	RTE_Ele3_69	No	No	NO	0	0	6	YES	YES	YES	NO	YES	YES	YES	NO
AGAP011787	Agam:CLIP22	CLIPA5	CLIPA	CR1_Ele20_20248	No	No	NO	0	0	6	YES	YES	YES	NO	YES	YES	YES	NO
AGAP011787	Agam:CLIP22	CLIPA5	CLIPA	gypsy_Ele40_166	No	No	NO	0	0	6	YES	YES	YES	NO	YES	YES	YES	NO
AGAP011788	Agam:CLIP32	CLIPA14	CLIPA	-	-	-	-	-	-	-	-	-	-	-	-	-	-	NO
AGAP011790	Agam:CLIP21	CLIPA2	CLIPA	tSINE_Ele1_5157	Yes	No	NO	0	0	7	YES	YES	YES	YES	YES	YES	YES	NO
AGAP011791	Agam:CLIP23	CLIPA1	CLIPA	-	-	-	-	-	-	-	-	-	-	-	-	-	-	YES
AGAP011792	Agam:CLIP19	CLIPA7	CLIPA	tSINE_Ele2_15540	No	No	NO	0	0	7	YES	YES	YES	YES	YES	YES	YES	YES
AGAP011824	Agam:PRDX2	TPX4	TPX	-	-	-	-	-	-	-	-	-	-	-	-	-	-	NO
AGAP011952	Agam:CASP7	CASPS3	CASPS	hAT_Ele8_1504	Yes	No	YES	0	0	7	YES	YES	YES	YES	YES	YES	YES	NO
AGAP011952	Agam:CASP7	CASPS3	CASPS	hAT_Ele8_5032	No	No	NO	0	0	7	YES	YES	YES	YES	YES	YES	YES	NO
AGAP011974	Agam:SCR1	SCRC1	SCRC	-	-	-	-	-	-	-	-	-	-	-	-	-	-	NO
AGAP012000	Agam:FREP46	FREP46	FREP	-	-	-	-	-	-	-	-	-	-	-	-	-	-	NO
AGAP012037	Agam:CLIP14	CLIPB20	CLIPB	-	-	-	-	-	-	-	-	-	-	-	-	-	-	NO
AGAP012045	Agam:SRRP16	RM62E	Rm62	m3bp_Ele1_356	No	No	NO	0	0	7	YES	YES	YES	YES	YES	YES	YES	NO
AGAP012289	Agam:SRRP2	DCR2	Dicer	-	-	-	-	-	-	-	-	-	-	-	-	-	-	NO
AGAP012326	Agam:TOLL4	TOLL7	TOLL	-	-	-	-	-	-	-	-	-	-	-	-	-	-	YES
AGAP012352	Agam:ML1	ML1	ML	-	-	-	-	-	-	-	-	-	-	-	-	-	-	NO
AGAP012385	Agam:TOLL1	TOLL8	TOLL	-	-	-	-	-	-	-	-	-	-	-	-	-	-	NO
AGAP012387	Agam:TOLL2	TOLL6	TOLL	-	-	-	-	-	-	-	-	-	-	-	-	-	-	NO
AGAP012409	Agam:BGBP7	GNBPA2	GNBPA	-	-	-	-	-	-	-	-	-	-	-	-	-	-	NO
AGAP012523	Agam:SRRP17	RM62F	Rm62	P_Ele7_4744	Yes	No	YES	0	0	4	YES	YES	YES	NO	NO	NO	YES	NO
AGAP012523	Agam:SRRP17	RM62F	Rm62	m2bp_Ele10_3409_nonREF	Yes	No	NO	0	0	3	YES	YES	YES	NO	NO	NO	NO	NO
AGAP012523	Agam:SRRP17	RM62F	Rm62	Tc1_Ele4_2145	No	No	-	-	-	1	NO	NO	NO	NO	NO	NO	YES	NO
AGAP012591	Agam:CLIP12	CLIPA3	CLIPA	-	-	-	-	-	-	-	-	-	-	-	-	-	-	NO
AGAP012616	Agam:PPO5	PPO5	PPO	PIF_Ele11_10875	No	No	NO	0	0	6	YES	NO	YES	YES	YES	YES	YES	NO
AGAP013106	Agam:ML13	ML29	ML	PIF_Ele1_3111	No	No	NO	0	0	7	YES	YES	YES	YES	YES	YES	YES	NO
AGAP013388	Agam:ML9	ML10	ML	-	-	-	-	-	-	-	-	-	-	-	-	-	-	NO
