# Supplementary material for: Transposable element variants and their potential adaptive impact in urban populations of the malaria vector Anopheles coluzzii
Source: HighWire-hosted journal article supplement (doi:10.1101/gr.275761.121), 2021-12-29
Supplement: Supplemental_Table_S13.xlsx [file Supplemental_Table_S13.xlsx]

## Sheet: S13. Comparison of landscapes
Table S13. Comparison of the TE copies age distribution (TE landscape) obtained with dnaPipeTE and estimating the identity of the insertions identified by REPET using BLAST. The distributions were compared using a Kolmogorov-Smirnov test and the p-values are reported. Significant differences between superfamilies in each strain are highlighted in yellow.
Superfamily	DLA112	DLA155B	DLA146	LBV88	LBV136	LBV11
DNA/	0.652971	0.408553	0.711235	0.652971	0.652971	0.652971
DNA/CACTA	0.00088649	1.61257e-05	0.00292721	0.00368115	0.00368115	0.177718
DNA/Gambol	0.324	0.324	0.324	0.324	0.324	0.711235
DNA/hAT	0.589101	0.408553	0.533155	0.864283	0.652971	0.589101
DNA/Helitron	0.853482	0.853482	0.853482	0.853482	0.853482	0.963945
DNA/m3bp	0.997192	0.997192	0.997192	0.997192	0.997192	0.997192
DNA/m4bp	0.864283	0.408553	0.864283	0.864283	0.864283	0.864283
DNA/m8bp	0.963945	0.963945	0.963945	0.963945	0.963945	0.963945
DNA/mTA	0.963945	0.963945	0.963945	0.963945	0.963945	0.963945
DNA/P	0.589101	0.133308	0.539999	0.652971	0.204277	0.711235
DNA/PIF-Harbinger	0.533155	0.533155	0.544143	0.544143	0.544143	0.544143
DNA/PiggyBac	0.544143	0.238091	0.471281	0.471281	0.471281	0.471281
DNA/Tc1-Mariner	0.652971	0.533155	0.533155	0.539999	0.652971	0.711235
DNA/Transib	0.213262	0.0666539	0.0793638	0.0184057	0.213262	0.392734
LINE/	NA	NA	0.27	0.00409016	0.000500172	0.00134185
LINE/CR1	0.136184	0.997192	0.213262	0.168375	0.136184	0.136184
LINE/I	0.00439081	1.8597e-06	0.711235	0.0595228	0.213262	0.0239041
LINE/Jockey	0.997192	0.997192	0.997192	0.997192	0.997192	0.997192
LINE/L1	0.999991	0.00402555	0.999991	0.999991	0.999991	0.999991
LINE/L2	0.999991	0.999991	0.999991	0.999991	0.999991	0.999991
LINE/Loner	0.224499	0.27	0.224499	0.266577	0.27	0.224499
LINE/Outcast	0.213262	0.00088649	6.64155e-11	0.102138	0.00292721	0.864283
LINE/R1	0.589101	0.589101	0.963945	0.589101	0.589101	0.963945
LINE/RTE	1	1	1	1	1	1
LTR/	0.652971	0.133308	0.652971	0.652971	0.652971	0.711235
LTR/Bel-Pao	0.997192	0.0184057	0.997192	0.997192	0.997192	0.997192
LTR/Copia	0.652971	0.00177298	0.0666539	0.405	0.136184	0.999991
LTR/Gypsy	0.963945	0.0717123	0.785468	0.963945	0.785468	0.963945
SINE/tSINE	0.997192	0.997192	0.997192	0.997192	0.997192	0.997192
